# Supplementary material for: Bladder Cancer Outcome and Subtype Classification by Gene Expression
Source: Oxford University Press journal article supplement (doi:10.1158/1078-0432.ccr-04-2409), 2005-06-01
Supplement: 10780432ccr042409-sup-classifiertavst1.xls [file 10780432ccr042409-sup-classifiertavst1.xls]

## Sheet: T1vsTa
Table. PAM classifier of pT1 versus pTa tumors. Genes are sorted according to the highest difference between classes. Clones in bold have been sequence verified.
NAME	Symbol	GenBank ID	FoldChange	UniGeneID
interferon, gamma-inducible protein 16	IFI16	AA490996	0.27475	Hs.370873
caspase 1	CASP1	T95052	0.36900	Hs.2490
hypothetical gene BC008967	BC008967	AA431770	0.41673	Hs.148258
G-protein signalling modulator 3 (AGS3-like, C. elegans)	GPSM3	AA410896	0.39790	Hs.288316
transducin-like enhancer of split 1 (E(sp1) homolog, Drosophila)	TLE1	T61445	2.35411	Hs.406491
CDC6 cell division cycle 6 homolog (S. cerevisiae)	CDC6	H59204	2.30022	Hs.405958
BRCA2 and CDKN1A interacting protein	BCCIP	T91245	2.25804	Hs.337008
lymphocyte-specific protein 1	LSP1	T90632	0.23576	Hs.56729
four and a half LIM domains 1	FHL1	AA455925	0.46154	Hs.421383
histone 2, H2be	HIST2H2BE	AA010223	2.14947	Hs.2178
cyclin A2	CCNA2	AA608568	2.15364	Hs.85137
solute carrier family 4, anion exchanger, member 2 (erythrocyte membrane protein band 3-like 1)	SLC4A2	AA026682	2.20886	Hs.433984
cell division cycle 2, G1 to S and G2 to M	CDC2	AA598974	2.05114	Hs.334562
CCAAT/enhancer binding protein (C/EBP), alpha	CEBPA	AI669881	2.08294	Hs.76171
ubiquitin-conjugating enzyme E2C	UBE2C	AA430504	2.02259	Hs.93002
serine/threonine kinase 6	STK6	R19158	2.03170	Hs.250822
utrophin (homologous to dystrophin)	UTRN	W84486	0.53086	Hs.250607
phospholipase A2, group V	PLA2G5	R32410	1.96170	Hs.319438
histone 1, H2bc	HIST1H2BC	H70775	1.92584	Hs.356901
hypothetical protein MGC5528	MGC5528	AA843451	2.05695	Hs.315167
paraoxonase 2	PON2	AA446028	0.55656	Hs.165598
growth differentiation factor 1	GDF1	AI939570	0.57128	Hs.412355
histone 1, H2bk	HIST1H2BK	N71982	1.89025	Hs.247817
mal, T-cell differentiation protein	MAL	AA227885	3.02376	Hs.80395
CD44 antigen	CD44	AA282906	0.56177	Hs.306278
serine/threonine kinase 12	STK12	H81024	1.75078	Hs.442658
Homo sapiens cDNA FLJ11472 fis	FLJ11472	AI022993	2.52800	Hs.64542
signal sequence receptor, alpha	SSR1	AA450360	2.35288	Hs.250773
activated leukocyte cell adhesion molecule	ALCAM	R39862	0.47668	Hs.10247
high-mobility group box 1	HMGB1	AI375302	1.79821	Hs.434102
centromere protein F, 350/400ka (mitosin)	CENPF	AA701455	2.03319	Hs.77204
metallothionein 1L	MT1L	N80129	0.51470	Hs.374950
trophinin associated protein (tastin)	TROAP	H94949	1.84309	Hs.171955
karyopherin alpha 2 (RAG cohort 1, importin alpha 1)	KPNA2	AA489087	1.78687	Hs.159557
sialyltransferase 1	SIAT1	AA598652	0.44008	Hs.2554
histone 1, H3d	HIST1H3D	AI399887	1.93528	Hs.239458
CTP synthase	CTPS	AA476603	1.64432	Hs.251871
protocadherin gamma subfamily C, 3	PCDHGC3	AA478467	0.59588	Hs.283794
keratin 20	KRT20	AA133469	2.65483	Hs.84905
v-myb myeloblastosis viral oncogene homolog (avian)	MYB	X82032	2.03790	Hs.407830
topoisomerase (DNA) II alpha 170kDa	TOP2A	AA504348	1.79007	Hs.156346
KIAA0186 gene product	KIAA0186	AA725561	1.74964	Hs.360033
Mdm2, transformed 3T3 cell double minute 2, p53 binding protein	MDM2	R80235	3.21834	Hs.212217
v-kit Hardy-Zuckerman 4 feline sarcoma viral oncogene homolog	KIT	N20798	0.29084	Hs.81665
methylene tetrahydrofolate dehydrogenase (NAD+ dependent)	MTHFD2	AA480995	1.71098	Hs.154672
branched chain aminotransferase 2, mitochondrial	BCAT2	AA436410	1.62313	Hs.512670
anaphase-promoting complex subunit 7	ANAPC7	T68445	0.42576	Hs.530379
chromosome 20 open reading frame 1	C20orf1	H73968	1.93714	Hs.9329
wingless-type MMTV integration site family, member 5B	WNT5B	W44518	0.49796	Hs.306051
BRAF35/HDAC2 complex (80 kDa)	BHC80	R02569	0.54708	Hs.104888
histone 1, H2am	HIST1H2AM	AI095013	1.80695	Hs.134999
kinesin family member 2C	KIF2C	AA400476	1.70405	Hs.69360
collagen, type XVII, alpha 1	COL17A1	H87536	0.40464	Hs.117938
sal-like 2 (Drosophila)	SALL2	H23254	0.50022	Hs.416358
