# Supplementary material for: Bladder Cancer Outcome and Subtype Classification by Gene Expression
Source: Oxford University Press journal article supplement (doi:10.1158/1078-0432.ccr-04-2409), 2005-06-01
Supplement: 10780432ccr042409-sup-log2ratios.xls [file 10780432ccr042409-sup-log2ratios.xls]

## Sheet: BladderLog2Ratios
Log2 ratios for 80 bladder tumors (UR), 3 normal bladder samples, and 9 bladder cancer cell lines. Data have been subarray median centered and global LOESS corrected. Gene_ID corresponds to a unique identifier for each of the features on the array; Name is the name of the cDNA or a GenBank ID. Unigene ID is the Unigene identifier for the particular cDNA clone. Cells without a log2 ratio value (bl…
GeneOrder	Gene_ID	Name	Unigene ID	UR558_T3	UR590_T3	UR496_T2_SCC	UR531_T3	UR591_T3	UR261_T3	UR437_Ta	UR534_T3	UR354_Ta	UR394_Ta	UR514_Ta	UR523_Ta	UR540_Ta	UR240_Ta	UR530_Ta	UR516_Ta	UR396_Ta	UR581_Ta	UR404_Ta	UR151_Ta	UR343_T1	UR254_T1	UR556_Ta	UR461_T4	UR286_T1	UR520_T1	UR467_T1	UR250_T1	UR477_T1	UR367_Ta	UR263_T1	UR479_T1	UR179_Ta	UR119_T1	UR325_Ta	UR468_T2_SCC	UR356_T2	UR498_T3	UR438_T2	UR445_T2	UR351_T3	UR524_T2	UR361_T2	UR449_T2	UR044_T2	UR106_T2
1	AA443547*1G1	v-rel reticuloendotheliosis viral oncogene homolog A RELA	Hs.75569						0.045769	0.500796	0.593143	-0.503622	-0.785439	-0.163349	-0.230963	0.187403		0.187514	-0.0447162	0.108683			-0.0450946	-0.373866	0.306633	-0.101614	0.447571	-0.950166	0.272474	0.255569	1.21398		-0.421121	-0.205922	0.0886576			0.0791108	0.51292	-0.128601		0.638584			0.00274865	0.945457	0.166099	0.162271	-0.48133
2	AA069596*1G5	thyrotropin-releasing hormone TRH	Hs.182231	-0.750154		-0.167841	-0.474347	-0.113412	-0.447204	0.285785	-0.804124	-0.650017		-0.380143	-0.182874			-0.372503	-0.836698	-0.321593	-0.114002	-0.692484	-0.0765709	-0.356466	0.329058	-0.249808	-0.414883	-1.81833	-1.04904	-0.667981			-1.37381	-0.329109		-0.842573	-1.09174	0.0189042	-0.409188	-1.7941		0.321136		0.343375	-0.669785	-1.56519	-1.78873	-0.952859	-0.66583
3	AA427491*1G9	T cell receptor alpha locus TRA@	Hs.74647	-0.0510152	0.180017	-0.199507	-0.428335	-0.271074	0.267037	-0.596481	-0.225047	-0.0512944	-0.382743	-0.372054	0.16468	0.156183	-1.3723	-0.198478	0.163669	0.107312	0.106265	-0.234268	-0.0418158	0.0772639	0.787161	0.0936294	0.212498	-0.32691	-0.321145	-0.159227	-0.289441	-0.0401883	-0.136993	-0.562443	0.247828	-0.207436	-0.520774	-0.0888519	0.388214	0.375978	0.486978	0.536487		0.386326	-0.418066	-0.275726	0.376624	0.201086	0.143606
4	R27585*2G1	proteasome (prosome, macropain) subunit, alpha type, 1 PSMA1	Hs.82159	-0.67859	-0.208272	-0.323357	-0.697473	0.647856	0.309886	0.124612	-0.0900332	-0.426787	-0.324682	0.0135628	-0.504657	-0.384443	-0.118641	-0.226565	-0.242715	-0.179813	-0.564549	-0.785848	-0.812353	-0.0809649	-0.603464	0.0423537	0.0383755	-0.526562	-0.530762	-0.235251	0.201361	-0.77164	-0.0334119	-0.706006	-0.160312	-0.47543	-1.02126	-0.229446	0.142658	-0.0180039	-0.153007	-0.444769	-0.354864	-0.161848	-0.303826	-0.577949	-0.0193308	0.348342	-0.536898
5	AA406362*2G5	prostaglandin E receptor 3 (subtype EP3) PTGER3	Hs.170917	-0.183941	0.521114	0.387109	0.693582	0.68589	1.30594	0.923032	0.613549		1.51285	0.681009	0.986722			0.532495	-0.153628	0.150298	-0.186342	0.600396	1.60245											1.10134		0.305365	0.251382					1.17065
6	N54494*2G9	carboxypeptidase B2 (plasma, carboxypeptidase U) CPB2	Hs.274495	-1.71948		-1.30749	-1.97156	-2.27086	-1.3377	-1.94345		-2.68737	-1.30197	-1.78931	-2.19611			-1.20156	-2.71991	-0.395045	-2.90777	-1.887		-0.181592	-0.0270377		-1.86012	-3.32795		-2.86488		-1.61213	-2.50006	-1.48601		-1.20888	-2.43039		-1.51564	-3.07815		-1.07189			-1.93043	-2.98117	-2.57917		-1.93818
7	AA455911*3G1	ATP-binding cassette, sub-family B (MDR/TAP), member 1 ABCB1	Hs.21330	0.0784332	-0.671088	-0.0878336	-0.401951	-0.0126828	0.353876	-0.350756		-0.385519	0.279613	-0.0339111	0.37686			-0.128367		-0.00743594	-0.361519	-0.469104	0.61774	-0.0431359	1.1286		0.447739	-0.580846		-0.534268			-0.210545	-0.0389593	-1.14367	-0.0159544	-0.365851		0.0238922		-0.22481	0.566214					-0.12477
8	AA075307*3G5	matrin 3 MATR3	Hs.78825						-0.48893	-0.614792	-0.173265	-0.481074	-0.497765	-0.266916	-0.153965	0.0495864	-0.380796	-0.996133	-0.0236864	-0.328932			-0.513123	-0.137355	-0.453312	0.245217	-0.586607	-0.0220574	-0.22834	-0.400953	-0.0218447	-0.574691	-0.55055	-0.819764	-0.158731			-0.50839	-0.627283	-0.501917	-0.324076	-0.786422		-0.299362	-0.800078	-0.691086	-0.198338	-0.550217	-0.464805
9	AA476241*3G9	procollagen-lysine, 2-oxoglutarate 5-dioxygenase PLOD	Hs.75093						-0.737193	-0.693383	-0.0573056	-0.953949	-0.441345	-1.00391	-0.809741	-1.01746	-0.537935	-1.12696	-1.05008	-0.635905			-0.854603	-0.725332	-0.114429	-0.455003	-0.542719	-1.5365	-0.249431	-0.377263	-1.03544		-0.490689	0.297278	-0.513954			-0.708821	0.163229	-0.517868	-0.373613	-0.544217		-0.72245	-0.309033	-0.120727	-0.445554	-0.218328	-0.310712
10	R40897*4G1	3-oxoacid CoA transferase OXCT	Hs.177584	0.47212					-0.385945	-0.0779235	-0.0447077	-1.94043	-2.08943	-2.7716	-1.18999		-2.52628	-2.87872	-0.832315	-0.918104	-1.59422	-2.26271	-1.63062	-0.383628	-1.50788	-1.16271	-0.942845	-5.12232			-0.0398382	-0.00370914	-1.83552	-1.82553		-2.16467	-3.28658	-4.03111	0.0691432	-1.16805	-1.76686	-1.00323		0.00153511	-0.580556	0.164465	-4.56143	-0.839277	-1.45134
11	H60423*4G5	solute carrier family 17 (sodium phosphate), member 2 SLC17A2	Hs.19710	0.22287		0.22575	0.303636	-0.232564		0.114325			0.95162		1.27366			0.470179	-1.30982	0.256181	-1.27556	-0.0192615	1.45547	2.24927												0.020278	-0.279303					0.584921
12	W47485*4G9	type I sigma receptor SR-BP1	Hs.24447	1.16152			-0.627119	-0.288927	-0.773042	0.150893	-0.629646	-1.043	-0.699778	-1.02569	-1.47938	-1.10169	-0.309854	-0.843284		-0.370754	-1.10423	-0.860285	-1.18247	-0.990903	-0.844879	-0.406729	-0.22525	-1.58232	0.0649495	-0.180858	-0.303907	-0.938288	-0.320551	-0.320294	-0.753058	-0.345118	-0.509745	-1.70601	0.0103546	-0.505873	-0.157346	-0.107921	-1.42724	-0.881076	0.55287	0.0410159	-0.160379	0.399525	0.754438
13	AA151065*JK200D1a	mitogen-activated protein kinase kinase kinase 5 MAP3K5	Hs.186486	0.60303	-0.11384	0.549308	0.967023	1.02282	0.290968	1.57768	1.20022	2.27278	1.71447	2.14946	3.46395	1.97376	2.29413	1.33317	2.29928	1.28003	2.73322	1.12649	2.17913	1.86325	1.73665		1.51649	1.85453	0.945251	0.849523	2.13734	1.68634	1.87854	1.84215	1.73318	1.53137	0.864119	3.39995	1.2478	1.5695	0.877961	1.4166		1.22508	1.56411	0.938429	-0.262199	1.40732	1.37808
14	H08749*JK200D9a	mitogen-activated protein kinase kinase 3 MAP2K3	Hs.514012						-0.877504	-0.193195	-0.541592	-0.0394054	0.0282968	-0.360143	-0.544427	0.511535	-0.334321	0.405866		-0.188637			0.389308	0.185607	-0.664443	0.0576437	0.728327		-0.0736251	0.901105	-0.874011	-0.0628643	0.00908625	0.184411	0.474409			-0.80605	-0.0132955	0.752071	-0.657793	-0.33093		-0.115472	-0.335866	0.0131733	0.14423	0.310071	-0.174948
15	AA608568*JK200D17a	cyclin A2 CCNA2	Hs.85137						-0.832055	-1.2083	-0.895817	-2.75752	-2.42238	-1.12586	-1.48582	-4.24775	-0.77867	-1.8013	-1.5513	-1.12			-1.73455	-1.5823	-0.574598	-0.871985	-0.986833	-0.453952	-0.0044299	-1.78619	-0.616396	-0.91843	-0.870833	-1.00628	-1.23096			-1.0824	-0.614021	-0.9295	-1.09167	-0.350561	-2.10406	-0.988753	-0.387604	-0.683862	-0.888044	-0.178314	0.256677
16	R14663*JK200H1a	zinc finger protein 217 ZNF217	Hs.155040	-0.819826		0.0854302			-0.819928	0.270983	0.256529	0.122349	0.0683094	0.434471	-0.138816		0.198907	-0.0326805	0.0440301	-0.227612	0.547512	0.351376	0.448024	0.538871	0.310474	0.883614	0.0504461	-0.0220608	-0.44325	0.546634	0.258256	0.540168	-0.0986003	0.0508518	-0.745457	0.66862	0.750147	0.71565	-0.24106	-0.04316	-0.923805	0.465616	0.266314	-0.407128	-1.27323	-0.865226	0.434213	-0.213572	0.0555212
17	T58932*JK200H9a	FOS-like antigen 2 FOSL2	Hs.220971						0.211536	1.05367	1.46672	1.22489	1.37684	1.0571	0.761797		1.82314	2.18884	0.928345	0.524448			1.75008	1.31166	1.48821	1.54103	0.764941	1.44378	0.196837	1.71819	0.359448	0.299746	1.81027	0.72366	0.604207			1.31576	1.20116	0.549097	1.50956	0.804539	1.61084	0.301438	0.371528	0.803295	2.6933	0.104668	1.66753
18	B-Myb*JK200H17a	B-Myb	Hs.531941						-1.11665	-0.395327	-0.307937	-2.31481	-1.64431	-1.35479	-2.08435	-1.10564		-1.91886	-3.15724	-1.20306		-0.639322	-1.63858	-2.83041	-0.0481101	-1.72466	-1.73785	-1.47703	0.36018	-2.64177	0.12267		-1.83177	-0.0469162		-1.24303		-1.75849		-1.65783	-1.42337	-0.0393553	-1.6272	-2.90473	-0.273742	2.58902	-1.90181	-0.236406	-0.151875
19	empty	Data not found EMPTY
20	empty	Data not found EMPTY
21	empty	Data not found EMPTY
22	H36426*JK200P1a	Data not found EMPTY
23	empty	Data not found EMPTY
24	empty	Data not found EMPTY
25	AA497055*5G1	proteasome (prosome, macropain) 26S subunit, non-ATPase, 12 PSMD12	Hs.4295	-0.619121	-0.116769		-0.727719	-0.173212	-0.221747	-0.637166	0.247976	-0.554736	-0.558035	-0.0438541	-0.41217	0.0216405		-0.564734	-0.208694	-0.243472	-0.598871	-0.418135	-0.611105	-0.112541	-0.507438	0.619395	0.227166	0.347868	0.0189273	0.619491	0.309832	0.314892	-0.329943	0.244601	0.0376666	0.0452939	-0.153791	0.591222	-0.0877714	-0.428598	-0.0316741	-0.205076	-0.473831	-0.365839	0.241888	0.0945002	-0.307316	0.259485	0.0507942
26	AA464238*5G5	platelet-activating factor acetylhydrolase, PAFAH1B3	Hs.6793	-0.126379	0.840479	-0.440562	0.231205	0.724686	0.505943	0.499861	0.298861	-0.0641772	0.902578	0.832826	0.275923	0.180894		0.377584	-0.749739	-0.199051	0.131603	1.03357	1.48048	0.902598	1.29149	0.534869		1.1095	1.46909	1.23592	1.61116		0.685703	1.90746	0.429811	0.453932	1.55024	0.781286	-0.234856	0.394412	-0.185078	0.598666		-0.8558	0.399692	1.03623	0.953496	0.286076	0.541445
27	W93413*5G9	neuronal Shc SHC3	Hs.151123	0.780813	-0.374134	0.137968	0.0498988	1.4223	0.22056	1.3163	1.36405	0.214706		0.87366	0.312401			0.532489	0.655604	0.188283	0.156793	0.226052		2.06722	1.07218		0.32003		1.1402	1.62828			0.117406	1.43455		0.541141	0.40149		0.504608	0.284045	0.911575			0.058109			1.26722	-0.826585	1.68695
28	R91264*6G1	KIAA0205 gene product KIAA0205	Hs.3610	0.281259	0.188049	-0.560187	-0.874045	0.359446	0.0746528	-0.649805	0.296554	-0.171099	0.649695	0.485965	0.15534	-0.690391	-0.148804	-0.295558	0.378939	0.397267	0.0596591	-0.263267		0.818485	0.197329	0.609217	0.745486	0.162047	-0.690908	0.702372	0.963528	-0.165391	-0.254439	-0.0481292	0.186738	0.864965	-0.00768248	0.422327	0.240137	0.110385	0.186515	-0.739667		0.134704	-0.970948	-0.259891	0.630395	0.27443	0.740572
29	R54823*6G5	SREBP CLEAVAGE-ACTIVATING PROTEIN SCAP	Hs.78442	0.531421	0.217339	-0.0905919	0.149497	0.101137	0.0752828	0.717591	0.361988	0.546924	0.685924	0.544811	0.327928	-1.16728	0.429168	0.561748		0.145266		0.255103	0.778111	0.875569	0.820046	0.0109857		0.47655	0.161613	0.752261	1.90048	0.480215	0.530731	0.954348	-0.0262488	0.590651	0.515652	0.755907	0.225908	0.251599	0.135048	0.148794		0.493907	0.284035	0.683221	1.04962	0.0464851	0.514494
30	H05099*6G9	KIAA0182 protein KIAA0182	Hs.75909	-0.303804	-0.500243	-0.998056	-0.92432	-0.216301	0.111415	0.00670062	-0.0224984	-0.423122	-0.423659	-0.328446	-0.309835	-0.442002	-0.143382	-0.0885741	0.0461145	-0.0423183	-0.534913	-0.441977	-0.218918	-0.551314	-0.256174	-0.185051	-0.318146	-0.482609	-0.579437	-0.715008	0.870688	0.0331418	-0.659591	-0.271958	-0.766476	-0.239009	-0.770491	-0.166751	-0.531386	-0.345052	-0.736268	-0.541514	-0.419594	0.0845653	-0.347293	-0.553404	-0.237317	-0.289768	-0.377172
31	H09172*7G1	dystrobrevin, alpha DTNA	Hs.54435	0.769166	0.838316	0.309599	-0.0206807	-0.304393	0.3011	-0.244673	-0.215546	-0.106658	0.229399	0.622191	-0.133767	0.413479		0.290925	0.682077	0.240376	0.0262136	-0.292223		0.273613	0.294387	0.329409	-0.267501	0.357525	0.0220326	0.048853	0.445431	-0.00120503	0.0665623	-0.148382		-0.158481	-0.0650785	-0.197381	0.479122	-0.15599	0.0459488	-0.333094		-0.418036	0.466671	-0.71809	-0.0532402	-0.0349217	0.413701
32	AA495974*7G5	Epstein-Barr virus induced gene 3 EBI3	Hs.185705	0.221173	-0.216883	0.155316	0.55296	0.2937	0.543038	0.807281	0.609894		0.700618	0.292188	0.4769			0.920842	0.0141866	0.459154	0.0674628	0.00626563		0.571425	0.391507	0.226138		0.491515		-0.0388709		0.983261	0.171615			-0.33784	0.0470529		0.778694	0.175147	0.0600497	2.07801		1.74835	0.770138
33	AA418694*7G9	ATX1 antioxidant protein 1 homolog (yeast) ATOX1	Hs.279910	-0.709112	-0.326396	-0.141829	0.0249704	-0.0720687	-0.745351	0.42408	-0.156596	-0.831676	-0.516528	-0.937888	-1.12204	-0.267351	-0.208023	-0.371638	-1.15456	-0.251435	-0.723235	-0.605476	-0.167569	-0.369888	-0.779366	-0.105564	-0.947854	-0.178897	0.477509	-0.292058	-0.584369	0.12529	-0.704522	-0.435408	-1.23612	-0.367725	-0.367706	-0.38096	0.256025	-1.14673	-0.653809	0.152442		-0.0316397	1.02292	-0.958293	-0.733614	0.0829383	-0.94531
34	AA053810*8G1	SWI/SNF related, matrix associated, actin dependent regulator of chromatin SMARCD3	Hs.71622	0.996719	0.383758	0.900632	0.234912	0.169157	2.052	0.901748	1.06944		1.15029	1.10334	0.759586		3.49602	2.24203		0.178099	0.617401	0.17592	1.81924	1.13818	2.20417	1.24908	0.718924	2.23062	1.75567	2.05056	2.2411	1.70284	1.24853	1.40967		0.332033	0.0190157	1.88193	1.62364	1.21186	1.3222	1.04962	1.20834	2.11463	2.05388	3.11548	2.51715	2.48047	2.42347
35	N73827*8G5	KIAA1504 protein KIAA1504	Hs.157426	-0.465605		-0.0760802	-0.72505	-0.0523565	-0.385386	1.55684	0.22143	0.459909	1.08135	1.24541	0.248928		0.918099	-0.0206062	-0.1529	0.856494	-0.353186	0.23095		1.1507	0.801622	0.465812		-0.280577	1.29847	1.88376	0.368785		0.0469308	0.83547		1.39917	0.599898	1.7981		-0.50571	-0.44358	1.68461	0.747517	-0.485994	-0.50553	2.30617	-0.503744		-0.441509
36	R15111*8G9	CUG triplet repeat, RNA binding protein 1 CUGBP1	Hs.81248	-0.565863		-0.080444		0.306341	0.0820043	-0.0833839	0.186447	-0.027874	0.099167	-0.387937	-0.486452	0.646127	0.83392	0.243881	0.10903	-0.134876		-0.18019	0.122035	-0.0706563	0.0502403	0.04297	0.0569915	-0.24082	0.202801	-0.273323	0.556786	-0.277379	0.261436	-0.209333	-0.200858		-0.37266	-0.109821	0.00628958	-0.0145926	-0.193003	-0.0135745	-0.1025	0.566317	0.0339931	0.153465	0.559382	0.411874	0.614771
37	R98709*45G1	EST R98709	Hs.36001						2.77241	0.402836			0.691216	1.96393	1.68533		3.10831	1.55715	1.43356	0.00366848			1.53685	0.923046	1.46036	0.07837			0.890867	2.29373	2.23762			1.33448				1.07736	1.00269	2.15228		1.86118		1.95045	1.23558	1.71035	1.47167	1.23703	2.54705
38	H65942*45G5	ESTs H65942	Hs.268887						-0.269564	-0.208628	-0.143291		-0.045826	0.175944	0.117159	0.191177	0.266492		-0.248559	0.0558242			0.935697	-0.0680963	1.11981	-0.186891	0.397688	-0.186193		-1.3276	-0.247005			0.154304				-0.962223	0.111038	0.580727		-0.014502			-0.329247	-0.215222	-0.774928	-0.212249	0.266192
39	R99004*45G9	ESTs R99004	Hs.59719						0.619478	0.435346	0.334546		0.587569		1.25894	1.40287		0.13366	1.14563	0.224867		0.191042	1.48982	0.917071	1.28389	-0.15266	1.11873	0.721862		1.06695	1.28104		0.251832	0.897464		0.304792	0.526967	0.726879	0.764201	1.36088	1.29872				0.372321	1.53608	0.960098	1.57084	1.54021
40	N64033*46G1	Homo sapiens cDNA FLJ12776 fis, clone NT2RP2001678. N64033	Hs.35982	0.629006	-0.22337	0.0863562	-0.49712	0.0757605	0.0723493	-0.285088	0.393589		-0.0962714		0.714768	-1.05622		-0.0858976	1.19664	0.205426	0.928876	0.138624	0.357723	0.0715653	1.02062	-0.216622	0.918653	0.308467		-1.11769	0.0726952			-0.202063		0.163555	0.492632		0.0109819	0.45285	0.715509	0.121956		0.818815	-0.287313	0.00763759	0.206564	-0.0962689	1.0604
41	H59141*46G5	hypothetical protein FLJ20010 FLJ20010	Hs.91816						0.0746119	0.509649	0.0961031	-0.433913	0.424618	0.0522953	-0.121965	0.14698	0.450303	0.728175	-0.274596	0.403315		0.160781	0.537486	0.173967		-0.190148				0.108635			0.0996865	0.639152		0.00125285	0.136492	0.41274	0.462712	0.247044	-0.00667541	0.199557					0.135013		0.0315884
42	H59602*46G9	ESTs H59602	Hs.37748						0.385251	0.0637538	0.252505		0.508751	0.78696	0.847045			-0.277534	0.440923	0.23691			1.20421	0.508757	1.14333	-0.265872	0.950842	-0.0536285		-0.661511	0.353057		0.305984	-0.0218521				0.652783		0.750781	0.557076	0.572337			-0.162595		0.0279621	0.429254	0.94749
43	AA151065*RJ200 AG1	mitogen-activated protein kinase kinase kinase 5 MAP3K5	Hs.186486						0.0702241	0.986857	0.71089	1.97253	1.25277	1.39023	2.58408	1.46121	1.95701	1.20064	1.95165	0.613384	2.37611	0.993258	1.59533	1.32546	1.41945	0.56917	1.6935	1.11445		0.42746	1.57387	0.81736	1.38246	1.35681	0.749337	1.25217	0.754754	2.56658	0.815866	1.16822	1.07807	1.15933	1.00091	1.00841	0.882668	0.20567	-0.8547	0.954697	1.03802
44	H08749*RJ200 AG5	mitogen-activated protein kinase kinase 3 MAP2K3	Hs.514012						0.334298	-0.747044	-0.0290366	-0.133246	-0.390654	-0.65797	-0.435126	-0.0513014	-0.427986	-0.318087	-0.280401	-0.537654			-0.378735	-0.155324	-1.09975	0.0565588	0.348237	-0.783997	-0.0485479	-0.34052	-1.29845	0.00387189	-0.397684	-0.0145139	0.0186756			-0.347493	-0.041999	-0.102938	0.0973935	0.216624	-0.106027	-0.157546	-0.657804	-0.618128	-0.644361	-0.444303	-0.335589
45	AA608568*RJ200 AG9	cyclin A2 CCNA2	Hs.85137						-0.662451	-1.7365	-1.69637	-1.10109	-2.09768	-1.60334	-1.66862	-2.04582	-1.25009	-2.04088	-1.70351	-1.47013			-1.64186	-1.25003	-1.01181	-0.996139	-1.64332	-1.33115	-0.800991	-2.23734	-1.37735	-0.480842	-1.56374	-1.0958	-1.66491			-1.26992	-1.12901	-1.18276	-0.642467	0.0330309	-1.78929	-1.45286	-1.2912	-1.72019	-1.8106	-0.906145	-0.654934
46	R14663*RJ200 AG1	zinc finger protein 217 ZNF217	Hs.155040						-0.710407	0.433401	-0.504324	-0.545515	-0.550994	-0.612079	-0.692925	-0.770631	0.0100497		-0.412081	-1.08411			-0.707606	-0.648892	-1.23662	0.251506	-0.434273	-0.0878245	-0.706767	-0.989004	-0.588114	0.338794	-0.668872	-0.163685	-0.641482			-0.666431	-0.892682	-0.129517	-1.25545	-0.554207	-0.347333	-0.917125	-1.36967	-1.19145	-0.286683	-0.733519	-0.864337
47	T58932*RJ200 AG5	FOS-like antigen 2 FOSL2	Hs.220971						-0.347998	0.62847	0.331655	0.261392	0.370079	0.190119	0.137609	0.293883	0.898127	0.98618	0.636448	-0.41906			0.615522	0.389313	0.22034	1.06337	0.320809	0.674201	-0.0713265	0.24782	-0.209436	0.182026	0.739999	0.146557	0.254504			0.259186	-0.0159854	0.350967	0.476108	0.0900438	0.746246	-0.216338	-0.459806	-0.331979	1.31463	-0.400004	0.660631
48	B-Myb*RJ200 AG9	B-Myb	Hs.531941						-0.850411	-0.134485	-0.0659508	-1.49706	-0.912205	-1.1513	-1.59453	-2.12788	-0.914796	-1.0014	-2.09701	-0.0571801			-0.83337	-1.38817	0.0532881	-1.53557	-1.50752	-0.97519	0.564391	-1.50842	0.57195	-1.21629	-1.43135	0.186587				-0.551453	-0.501784	-0.985015	-0.916906	0.201079		-1.99803	-0.372589	2.33073	-0.986932	0.219604	0.12759
49	N74018*9G1	cadherin 12, type 2 (N-cadherin 2)	Hs.44898	-0.66447	0.21974	-0.210294	-1.47406	-0.400939	-0.347648	-0.0520514	0.618131	0.576941	-0.0281675	0.298057	0.485689	0.271931	-1.22793	0.116148	1.26062	0.936697	0.367097	-0.37764	-0.451747	0.477329	0.650607	0.678005		0.442341	-0.865952	-0.467893	2.08691	0.0102146	-1.01053	-0.457156	-0.0080599	-0.151794	0.389838	-0.150636	-1.26371	-0.977238	-0.565223	-0.692976		0.384916	-0.420314	-1.71959	0.16783	-0.431134	0.117433
50	R45941*9G5	insulin-like growth factor 2 (somatomedin A) IGF2	Hs.89655	-2.46271	-5.31402	-4.66405	-3.36219	-4.23955	-4.14439	-4.0686	-4.89509	-1.43523	-0.777618	-1.16948	1.28525	-3.34	-3.90595	-3.91788	2.16138	2.90605	0.783586	1.35455	2.31254	2.2668	-3.83536	-2.1308	-4.28338	1.48595	-4.01137		2.08213	0.790172	-1.97439	-2.19456	1.00415	2.3403	0.532423	-3.5182	-4.19639	2.42771	1.0108	-3.36729	-2.8376	-4.12902	-3.13303	-5.80658	-1.85854	-3.64568	2.71625
51	R72518*9G9	secretory carrier membrane protein 3 SCAMP3	Hs.200600	-0.0546388	0.101457	-0.761254	-0.266583	-0.173258	-0.65084	0.646351	0.215902	-0.401915	0.309426	-0.0786168	-0.403557	-0.12016	0.372071	-0.122312	0.127168	0.163458	-0.390789	0.0296073	0.782463	1.2896	-0.727283	0.346134	-0.896226		0.363986	0.873863	0.237481	0.0802522	-0.427279	0.88229	-0.411193	0.296592	-0.290197	0.244697	0.064711	0.156163	-0.282537	0.148859	-0.315054	-0.457075	0.340628		-0.0380301	0.0177677	0.667848
52	R41685*10G1	delta-like 1 (Drosophila) DLL1	Hs.250500						0.597888	-0.354193	-0.381943		0.680342	-0.258257	0.768193			0.356959		0.523134				2.32956	-0.550199	0.475393		1.31448		2.0707	0.274197	0.00407438	0.173965	0.549823	-0.000795506				-0.246297	1.49902	0.431189	0.0363438			-0.268143		2.32613		1.2004
53	H99736*10G5	chromodomain helicase DNA binding protein 1 CHD1	Hs.22670						-1.1173	-0.947961	0.36575	-0.520868	-1.07771	-0.222851	0.0318721	-1.39227	-1.36278	-1.67767	-0.0359421	0.239593			-0.637078	-0.0282631	-1.23816	-0.343309	-0.253602	-0.0121869	-0.418017	-0.153042	-0.121967	-0.67324	-1.09318	-1.66447	-0.761653			-1.01607	-0.374544	-0.631076	-0.15022	-0.862145		-0.035097	-1.64817	-1.09722	-0.598624	-0.246546	0.0949175
54	H54020*10G9	splicing factor, arginine/serine-rich 7, 35kDa SFRS7	Hs.184167	-0.636657				-0.216895	-0.434659	-0.802383	-0.0940127	-0.62562	-0.345217	0.0645952	-0.0621558	-0.37048	-0.183217	-1.09231		-0.154853	-0.233456	-0.192922	-1.02047	0.127858	-0.259856	-0.339604	-0.232938	0.330654	-0.429993	-0.353789	-0.422951	-0.870451	-0.450898	-1.16889	-0.510345	-0.832215	1.05852	-0.514802	-0.492751	-0.81782	0.0145215	-0.980261		0.120383	-0.221913	-0.393948	-0.521354	0.0121319	0.200231
55	H97778*11G1	cadherin 1, type 1, E-cadherin (epithelial) CDH1	Hs.461086	0.296369	-1.31352	1.04982	0.997923	-1.86954	0.574145	0.841591	-0.43669	1.96011	1.2496	1.46345	1.09479	1.02956	2.3718	2.21662	1.06998	0.625519	1.6669	1.80125	1.83811	1.1964	2.02897	1.21897	1.5155	1.76019	0.663614	1.29184	1.03556	2.04458	1.54319	1.38382	2.0741	1.4894	1.29722	2.75053	-0.582007	1.60421	0.795612	1.83008	1.29951	0.56826	-0.694321	0.854632	1.94123	1.43226	0.56393
56	R37756*11G5	nuclear cap binding protein subunit 2, 20kDa NCBP2	Hs.240770	-1.5183		-0.748093	-0.987173	-0.294222	0.158686	-0.576838	-0.612294	-0.124152	-0.503414	-0.646659	-0.784093	-0.567253	-0.0878216	-0.565759	-0.284286	-0.388461	-0.392692	-0.967244	-0.705459	0.557945	-0.617237	-0.122444	-0.33872	-0.67761	-0.44506	-0.136409	-0.622252	-0.00178869	0.501661	-0.591155	-0.0183467	-0.619663	-0.639593	0.38469	-0.887242	-0.245548	-0.275087	-0.894532	-1.11122	-0.801194	-0.486484	-1.07143	0.0514923	-0.300442	0.00209861
57	AA454852*11G9	proteasome (prosome, macropain) 26S subunit, non-ATPase, 2 PSMD2	Hs.74619						0.181438	0.183789	0.349678	-0.903171	-0.559059	-0.750469	-0.733069	-0.727778	-0.184163	-0.407024	-1.42958	-1.24239			-0.594152	-0.284668	-0.920803	-0.672554	-0.178371	-0.991169	-0.113245	-0.258536	-0.265377	1.04929	-0.322695	0.322198	-0.879996			0.0997879	-0.292141	-0.447629	-0.952874	-0.0491872	-0.661507	-0.660783	0.0973759	-0.152617	-0.487501	0.352651	0.23653
58	H52119*12G1	flavin containing monooxygenase 5 FMO5	Hs.14286	-1.30956	-1.75827	-1.0848	-1.1813	-0.703066	-1.06507	-0.578787	-0.706498	-0.927516	-0.387194	-0.819524	-1.198	-1.95601	-1.03422	-0.267907	-0.513389	-0.435553	-0.904685	-0.642293	-0.346835	-0.759747	-0.564866	-0.543331	-1.08281	-1.65866	-1.12078	-1.07388	0.259953		-1.36245	-0.813802		-0.767044	-1.37574	-0.953382	-0.587025	-0.762177		-0.486639		-1.28522	-0.78121	-0.111569	-1.3525	-1.75699	-1.0701
59	AA443093*12G5	fibroblast growth factor receptor 2 FGFR2	Hs.278581	-0.297922		-0.407413	-0.591344	-0.496352	-0.0912304	-0.509818	-0.777278	0.170094	-0.241288	0.26864	-0.102886		0.413932	0.398467	0.451159		0.0102558	-0.00669262	-0.0961652	-0.256435		0.0209377	0.31385			0.355107		0.373234	0.226801	-0.196578	0.164598	-0.210395	-0.0124292	0.347715	0.041767	0.389597	-0.140978	0.157375					0.791301		0.00794887
60	T64893*12G9	ferrochelatase (protoporphyria) FECH	Hs.26	-0.191237		-0.267981		0.0430629	0.628646	0.277292	-0.728013	-0.336794	0.0398197	-0.336435	0.142506	0.575815	-0.0317458	-0.15652	-0.029319	-0.131263	-0.0941103	-0.459665	0.215155	-0.763967	-0.4133	-0.137808	-0.722105	-0.364854	-0.0157187		-0.363895	0.0937851	0.248344	0.217355		-0.230308	-1.12015	-0.0579323	0.841693	-0.174266	-0.442008	-0.170905			0.216864		1.10684	-0.397572	0.342766
61	R02059*13G1	cholinergic receptor, nicotinic, epsilon polypeptide	Hs.278295						-0.108117	1.21499	0.350196	0.648177	0.403224	0.672042	1.1251	0.0840643	-0.251993	0.780003	0.300344	0.2023			1.22735	1.47657	0.0280422	0.368088	1.07743	0.0812312	0.571529	1.2275	-0.101531	0.776007	0.505643	1.15707	-0.193926			0.262622	1.0893	1.04227	0.464605	0.689402		0.336928	1.02928	0.200306	0.730442	0.0897769	0.0251068
62	R09220*13G5	Charcote-Leyden crystal protein CLC	Hs.889	-2.18942		-0.37358	-1.18651	-0.285021	-0.64831	-2.3916	-3.35426	-3.15381	-1.92734	-2.77916	-2.23657			-1.38689	-2.09234	0.195833	-3.25502	-1.26649		-2.50158	-1.744	-0.810371	-1.17898			-2.90695		-2.75372	-2.62732	-2.26855		-1.61258	-2.54223	-1.57132	-0.826112	-1.97985	-1.60128	-1.34465		1.35295	-3.08303	-4.30226	-4.13428
63	H94487*13G9	cathepsin E CTSE	Hs.1355	0.150659		0.0519479	-0.546887	0.569945		2.40308	0.761498	7.0638	5.25421	4.71374	4.40277	2.63941	3.50168	-0.638497	5.65934	0.653177	5.05686	4.48806	4.69617	4.4677	-0.249742	5.36591		1.33899		4.94156		3.47058		4.2937	1.36099	2.88513	4.47611		-0.486718	3.54997	-0.186589	0.308607			-0.792053		-1.19246
64	AA453776*14G1	alcohol dehydrogenase 5 (class III), chi polypeptide ADH5	Hs.78989						-0.0626782	-0.176948	-0.623972	0.604341	-0.569362	0.222795	0.40927	0.694491	-0.667016	1.13137	0.121993	0.0954573			0.0322316	-0.254896	0.711019	0.571498	-1.33694	0.495547	-0.445868	-0.413832	-1.40642	0.0288318	0.553179	-0.394935	-0.337147			0.832115	0.646628	-0.0543708	-0.245881	-0.559708		-0.441676	-0.766027	-0.803058	1.02983	-1.70103	-0.0963818
65	AA455931*14G5	adenylosuccinate lyase ADSL	Hs.75527							-0.684514	-0.280973	-0.246778	-0.028962	-0.562414	-0.191736		-0.165108	-0.212834	-0.477623	-0.095623			0.0360119	-0.774438	-0.72232	0.126503		-0.346956	0.178915	-0.021694	-1.35655	-0.476035	-0.489232	-1.37049	-0.269829			-0.0322728	-0.277843	-0.432757	-0.731116	-0.334873		-0.440989	-0.126594	-1.3718	-0.368505	-0.612388	-0.466965
66	H95792*14G9	acyl-Coenzyme A dehydrogenase, short/branched chain ACADSB	Hs.81934						-0.563203	-1.62879	-1.56205	0.112069	-0.31548	-0.72701	0.188184		-1.79257	0.827698	-0.213585	0.227114				-0.468748	-0.0335878	-0.467879	-0.913013	-0.453561	-1.9227	0.132058		-0.0192939	-0.0718698	-0.268981	0.436082			0.0278578		0.204332	-1.16452	-0.387909			-1.67926	-0.543155	0.163905	-1.25432	-0.227545
67	AA598572*15G1	ubiquitin-conjugating enzyme E2H (homologous to yeast UBC8)	Hs.344165	-0.224151		-0.712027	-0.0358777	-0.0619421	-0.0845371	0.167848	-0.201773	-0.278049	-0.116885	-0.51102	-0.331064	-0.00952758	-0.950572	0.498938	0.158768	-0.427095	-0.181926	-0.488111	-0.238425	-0.546135	0.0235573	0.624213	-0.0476798	-0.230206	-0.451809	-0.237651	0.679551	0.0425408	-0.205	-0.595677	-0.306459	-0.0931979	-0.737849	0.146618	0.268063	0.288543	-0.0588349	-0.215874	-0.19298	-0.0418602	-0.887289	-1.18056	-0.0973184	0.214452	-0.152017
68	AA599116*15G5	Secretoglobin, family 1A, member 1 (uteroglobin) SCGB1A1	Hs.523732	0.264446			0.938193	0.0552989		0.583483	0.0871827		0.189736	0.120959				0.356484		1.0958	0.0965044	0.129472		0.532862		-0.280134	-0.100029						0.0257176			0.533518	-0.107915					0.200646		7.2857	5.19189
69	AA450360*15G9	v-myb avian myeloblastosis viral oncogene homolog-like 2 MYBL2	Hs.179718	-0.794695	-0.449415	-0.82347	-1.26006	-0.794257	-1.25034	-0.534477	-0.239612	-3.7962	-1.92052	-1.54118	-2.33886	-3.42909	-4.25046	-1.74544	-3.22695	-1.53997	-4.12268	-0.472161	-1.69232	-2.66728	-0.0951608	-1.37431	-1.8169	-1.12051	0.595516	-1.83195	0.355459	-1.31603	-1.89226	0.152733	-2.27771	-1.48368	-0.770308	-1.35236	-1.21051	-1.4801	-1.52562	0.241508		-1.73531	-0.303718	2.62218	-1.44904	0.0277667	0.0466345
70	T49540*16G1	platelet-derived growth factor beta polypeptide PDGFB	Hs.1976	-0.569666	-0.457659	-0.645805	-0.823104	-1.07842	-0.726712	-0.650971	-0.833029	-0.33967	-0.109363	-0.111099	-0.505622	-0.11119	-0.205877	-0.194752	-0.457352	0.700548	-0.667936	-0.683987	-0.327435	0.0888437	-0.0877471	-0.109839	-1.04911	-0.44691	-0.518991	0.0875074	0.141128	-0.419117	-0.252214	-0.575709	-0.0420622	-0.663986	-0.678489	0.48887	-0.71275	-0.298331	-0.596132	-0.6883	-0.383611	-0.275472	-0.571372	-0.819563	-0.116479	-0.907644	-0.918124
71	AA151486*16G5	phosphoribosyl pyrophosphate synthetase 2 PRPS2	Hs.2910						-0.0730608	0.149654	0.142666	-0.0270179	0.574474	0.145385	0.577286	-0.427232	-1.07078	-0.406781	-0.184688	-0.335634			-0.354956	-0.169425	-0.236556	0.41851	0.112992	0.173452	-0.712521	0.274603	0.85091	-0.216964	0.32939	-0.0679678	0.505199			-0.126581	-0.796102	-0.557368	-0.41	0.123563	-0.590298	-0.426714	-0.291024	0.103642	0.158888	-0.545542	-0.873445
72	AA488373*16G9	phosphoglucomutase 1 PGM1	Hs.1869	-0.641789	-0.233827	-0.832334	-0.823657	-0.725732	-1.11669	-0.268344	-0.577706	-2.20569	-1.33516	-1.18689	-2.08452			-1.2695		-0.929979	-2.31433	-0.315609	-1.12178	-1.89787	-0.133341	-0.541459	-1.45269	-1.0679	0.725862	-1.68404		-0.857423	-1.01541	0.168204		-0.83848	-0.326451	-1.5433	-1.41251	-1.05096	-1.22417	0.0717751			-0.136786	2.35045	-1.13795
73	AA497029*17G1	lactate dehydrogenase A LDHA	Hs.2795	-1.23232		0.434896	-0.154959	0.647816	-0.533707	-0.492931	0.0677372	-0.475917	-0.52772	-1.26618	-1.03768	-1.63458	-0.53438	-1.46368	-1.70696	-1.93731	-1.97512	-0.871702	-1.11042	-0.806747	-0.708071	0.0638119	-0.0389283	-1.21034	-0.978589	-0.945774	-0.669444	-1.04953	-0.664323	-0.935899	-1.08538	-0.513589	-1.51525	-0.199345	0.412179	-1.53101	-0.553935	-0.622593	-0.368377	-0.186955	-0.665078	-1.36641	-0.369049	-0.0338346	-1.71989
74	T71363*17G5	serine dehydratase SDS	Hs.76751						-0.896409	-0.375769	-0.335989	-0.431162	-0.80634	-0.623161	-0.634808	-0.501075	-0.223702	-0.832027	-1.04484	-1.35125			-0.0292698	-0.878287	0.0192727	-0.507884	-0.340532	-0.0658021	0.46231	-0.734448	-0.469046	-0.677866	0.440898	-0.419885				-0.73604	-0.300177	-0.578395	-0.26746	0.222405	-0.503319	-1.0828	-0.160769	0.558495	-0.632292	0.0786264	-0.713347
75	AA488336*17G9	developmentally regulated GTP binding protein 1 DRG1	Hs.115242						-0.147234	-0.526616	0.604438	-0.653369	-0.439027	-0.448178	-0.475895	-0.432004	0.742634	-0.42811	-0.521461	-0.54327			-0.193131	-0.250831	-0.0917391	-0.129458	-0.0265971	-0.373877	-0.460016	-0.383934	-0.316258	0.45635	-0.077283	0.0833362				0.126751	0.0187518	-0.733374	-0.0460436	-0.31195	-0.673898	-1.03373		-0.523012	-0.148681	-0.0218452	0.548439
76	AA521469*18G1	GTP binding protein 1 GTPBP1	Hs.283677	-1.07694	-0.517705	-1.20836	-1.11047	-0.540962	-0.597441	-0.0698653	-0.625083	-0.293026	-0.126577	-0.562213	-0.207727	-0.0742407	-0.185422	0.133166	-0.0674423	-0.0654281	-0.118773	-0.80747	-0.61801	-0.618189	0.412289	0.484047	0.0778539	-0.379064	-0.400718	-0.153029	0.602065	-0.167593	-0.377717	-0.285658		-0.502415	-0.133639		-0.520462	-0.545814	-0.349201	-0.469806	-0.342465	0.00882114	-0.947844	-0.056642	0.203335	-0.624328	-0.534975
77	AA460827*18G5	protein phosphatase 1, regulatory (inhibitor) subunit 1A PPP1R1A	Hs.76780	-1.25981	-0.743137	-0.409901	-0.8708	-0.534287	-1.0724		-1.17737	-0.782403	-0.233197	-0.987672	-1.41037	-0.120166	-0.040624	-0.247693	-0.350387		0.180391	-0.393813	0.0234683	-0.579492		-0.318203	-0.419908	-0.868169	-0.296888	-0.783465	-0.482665		0.974175			-0.539358		0.728673	-0.981614	-0.403927	-1.00685	-0.662612		0.829649	-1.63961	-0.537337	-1.15531	-1.91968	-1.42538
78	AA598817*18G9	preferentially expressed antigen in melanoma PRAME	Hs.30743						-0.688063	-0.162631	-0.326504	-1.61157	-1.08444	-0.744899	-0.768481	-1.02548	-0.328772	0.306857	-1.025	-1.26429			-1.60336	-0.799188	-1.3268	-0.494737	-1.28833	-0.346936	-0.394129	-0.514832	-1.1164	-0.876844	-0.874473	-1.52031	-1.40557			-0.0539952	-0.112888	-1.33146	-1.31851	-1.3059	-1.50124	-1.21101	-0.58132		-0.923185	-0.918718	-1.05061
79	AA451891*19G1	guanine nucleotide exchange factor for Rap1 GFR	Hs.80620	0.129673	0.117577	0.43597	0.913144	0.667715	0.64268	-0.241477	-0.340844		-0.451683	0.266803	-0.193189	-0.830746		-0.0765528	-0.376377	-0.0815042	-0.42946	-0.131007		-0.421438	-0.400867	0.214505			0.461158	0.514877		0.366842	-0.101049	-0.509448		-0.281802	-0.0123758	-0.0833501	-0.228517	-0.877416	-0.201337	-0.374199		0.0959879	0.420148		-0.96875		0.734655
80	AA429602*19G5	KIAA0268 protein KIAA0268	Hs.241552						0.235385	0.0327376	0.0697874	-0.0357055	-0.301848	0.58249	0.111127		-1.9069	0.558674	0.0728847					0.358018	-0.18422	-0.155802	-0.319905	0.118568	-0.219152	0.355764		0.222877	0.765467	-0.335075				0.144271	0.00621357	-0.116602	-0.343734	-0.117857		-0.2459	0.357337	-0.815943	0.822587	-0.875395	-0.0425895
81	R42815*19G9	stabilin 1 STAB1	Hs.84753						-0.607351	-0.366316	-1.06652	-0.0275642	-0.139193	-0.262738	-0.903655		-0.506436	-1.62811	-0.24697	-1.74245			0.688915	0.0126257	-0.404528	-0.0945105	-1.34105	-0.128676	1.29989	-0.613624	-0.597103	0.711774	0.109247	0.482813	-1.14609			-0.696648	-1.15913	0.225154	-0.680945	-0.886023	-1.72338	-1.76213	-0.726701	0.0149101	0.190021	-0.289336	-0.0854566
82	AA480859*20G1	pleckstrin homology, Sec7 and coiled/coil domains 1(cytohesin 1) PSCD1	Hs.1050						0.382086	0.461256	0.835363	-0.182884	0.379962	0.212057	-0.24284	0.524347	0.454897	0.36341		-0.214616			0.566743	0.536504	0.451788	0.863107		-0.131053	-0.101608	0.633773	0.0763029	-0.0887287		0.24058	-0.542142			0.573007	1.28773	-0.296517	-0.13703	0.247324	0.0495211	0.562402	0.624416	1.44424	0.500085	1.35903	0.213784
83	T70037*20G5	histidyl-tRNA synthetase-like HARSL	Hs.278507						-0.0626789	0.799575	0.30157	0.531135	0.438119	0.875524	0.46478		-0.16442	0.185257	0.333006	-0.286701				0.76101	-0.0656749	-0.0884772		1.45671	0.448783	0.998312	-1.18716		0.092542	0.313431				0.611081		-0.0775349		-0.209449		-0.631667	0.151782		0.317633	-0.541795	-0.449383
84	T50313*20G9	mitogen-activated protein kinase kinase kinase kinase 1 MAP4K1	Hs.95424							0.197223	-0.889424		-0.0166757	-0.43745	0.163918			-0.146491		-0.145615				0.0932863	0.256524	-0.503003								0.187933				-0.515068	0.330961			0.953146	-0.634427
85	T60070*21G1	GTP-binding protein homologous to Saccharomyces cerevisiae SEC4	Hs.302498						2.23195	0.440874	0.471832	0.325397	0.856976	0.244513	0.710828	0.537795	0.630674	1.02426	0.507137	-0.301223				0.101194	0.794581	0.893577	-0.242261	-0.0612429	0.5783	0.349122	0.283182	0.452333	1.0368	0.762906	0.506434			0.563959	0.761967	0.648066	0.832094	0.375525	0.110904	0.530814	1.16791	-0.106402	0.719022	0.392873	0.0618015
86	AA425947*21G5	dickkopf (Xenopus laevis) homolog 3	Hs.4909						0.440034	-1.39987	-2.72078	-2.33085	-1.09223	-1.02309	-1.93496	-2.16459	-1.58334	-2.12298	-0.269782	-0.99518			-0.658278	-1.59316	-1.18731	-1.4458	-1.69183	-1.40435	-1.17809	-1.82881	-2.10353	-1.51539	-1.09257	-0.627027	-1.80182			-1.24697	-0.69169	-0.290972	-0.711132	-1.40906	-0.951132	-0.655355	-1.50907	-1.17901	-1.83201	-0.740642	-1.46832
87	AA452826*21G9	Purkinje cell protein 4 PCP4	Hs.80296						0.828453	-0.529719	-0.763778	-0.69966	-0.538747	-0.443492	-1.15056	-1.25517	-1.32704	-0.703103	-0.965961	-0.668229				-0.972008	-0.958507	-0.353139	-0.924385	-1.39245	-0.143066		-1.21798	-0.93683	-0.314942	-0.657593	-0.212674			-0.825313	-0.709699	-1.25758	-0.746569	-0.733707		-0.497407	-0.999404	-1.25564	-0.680231	-0.219469	-1.18446
88	AA446028*22G1	paraoxonase 2 PON2	Hs.169857						1.22554	-1.17121	1.90545	-0.67842	-0.0884069	-0.546956	0.507568	-0.0280866	-0.788763	-1.34419	0.384622	0.152593			-0.340613	-2.23063		0.0718945	0.367416	-1.16331	0.139633	-0.410046	-3.17828	-0.959193	0.497196	-0.719314	-1.73117			0.454909	-0.464953	-0.118822	-0.182346	0.424235		-0.489417	-0.314508	0.27615	0.288077	0.694308	0.495842
89	AA457238*22G5	calpain 6 CAPN6	Hs.169172						-0.449818	-0.953493	-0.221037	-1.69	-0.764157	-1.44569	-1.12617				-1.5169	0.60118				-1.70239	-1.11148	-0.63397	-1.50538	-1.96409	-0.867913	-0.941836	-1.79789	-1.21644	-0.781975	-1.01236				-0.77562		-1.91181	-1.54077	-0.944437			-1.39408	-0.314389	-2.141		-0.976512
90	AA251527*22G9	karyopherin (importin) beta 1 KPNB1	Hs.180446						-0.956278	-0.841753	0.578812	-1.10189	-0.905098	-1.2554	-0.975775	-1.02303	-0.965038	-1.33609	-0.891915	-0.826015			-1.44634	-0.741529	-1.07769	-0.285032	-0.778342	-0.493555	-0.221735	-0.751049	-0.64049	-0.878151	-1.2078	-1.59757	-0.792625			0.152316	-0.598554	-1.22412	-0.93552	-1.00679	-1.14001	-0.918613	-0.397598	-0.861153	-0.835528	-0.0644174	-0.240039
91	AA282134*23G1	glutaminyl-peptide cyclotransferase (glutaminyl cyclase) QPCT	Hs.79033						-0.419735	-0.163032	0.083631	1.01873	2.80377		-0.293912	0.501525	0.896536	-0.686086					0.8295	2.11253		0.0713419		0.351495	-0.466388	1.3326	0.174596	1.00955		0.280151				2.13343	-0.800395		1.44582	1.54591	0.663394	-0.223021	0.22057	2.15771	-0.911928	-0.849133
92	AA102257*23G5	alkylglycerone phosphate synthase AGPS	Hs.331666						0.0650306	-0.202679	0.0673925	-0.221847	0.0474776	-0.0637316	-0.127343	-0.0363677	-0.35288	-0.324006	-0.00105963	-0.394006			-0.15626	-0.265521	0.0334227	-0.026488	0.19444	-0.373684	-0.208875	-0.235925	-0.10518	0.026744	-0.326068	0.115067				0.10694	0.0100614	-0.0700778	-0.0800765	-0.207534	-0.3947	-0.304275	-0.186056	0.224643	0.0137049	0.289832	0.0564849
93	AA452556*23G9	translocating chain-associating membrane protein TRAM	Hs.4147						0.0208829	0.0440997	0.0104374	0.390611	-0.253507	0.616531	0.23081	0.31976	-0.387925	-0.673816	0.488263	-0.73831	-1.08554		-0.582269	1.83198	0.299486	0.420817	0.020671	0.0757218	-0.613707	0.779625	1.02968	0.0389093	-0.155234	-0.32093	0.805347			0.731445	-0.398405	0.195129	0.506881	0.0246486	0.693296	0.929423	-0.158665	0.762176	0.00135283	0.296749	-1.01504
94	H56918*24G1	Human clone 23933 mRNA sequence H56918	Hs.239483						-0.250215	-0.374468	-0.983132	0.214466	-0.205747	0.137992	0.264163	1.17737	0.396753	1.2833	0.791837	0.97916			0.776091	0.800138	0.507382	0.896928	0.244153	-0.0458054	-0.411326	0.417702	-0.394421	0.187192	0.340626	0.810491	-0.297661			0.378656	0.280226	0.410417	0.106957	-0.0621041	-0.611496	-0.154979	0.375727	-0.20703	0.566548	0.0177987	-0.872612
95	AA461108*24G5	ephrin-B2 EFNB2	Hs.30942						0.407568	-0.275336	-0.203606	-0.449162	-0.210699	-0.140152	-0.028502	0.487038	1.43961	0.523136	-0.059144	0.0123014			0.0375323	-0.315189	0.0421007	0.28069	0.144711	-0.266849	0.100578	-0.1072	-0.0628616	-0.139625	0.374255		-0.237117			0.290661	0.789031	0.0305252	0.576409	0.345382	0.331231	0.257439	0.337385	0.364685	0.100672	-0.166682	-0.235849
96	T57919*24G9	electron-transfer-flavoprotein, alpha polypeptide (glutaric aciduria II) ETFA	Hs.169919						0.00898819	0.16151	-0.55232	-0.0278646	-0.0691074	0.0120637	0.0543683	0.341488	0.193067	0.293192	-0.450749	-0.0917613			-0.342443	0.0352118	0.112537	0.716902	-0.402881	-0.209722	-0.547977	-0.0438587	-0.341725	-0.0452313	-0.319413	0.259577	-0.0988173			0.264294	0.183126	0.436441	-0.225695	-0.442026	-0.262392	-0.811423	-0.00930683	-0.128043	0.0186834	0.0891248	-0.211466
97	AA425217*25G1	cadherin 3, type 1, P-cadherin (placental) CDH3	Hs.2877							-0.800944	0.673108	-0.853153	-0.0174757	0.329646	0.577289	-0.421748	-0.955237	-0.16846	-0.02688	-0.0784137				0.521102	0.192015	0.481633	2.1844	-0.601958	-0.596485	0.457695	-1.44371	-0.0867014	0.413371	1.02259				1.26519	1.78989	0.284392	-0.125486	-0.0022422	-0.00437125	-0.549213	0.923593		0.332647	0.901495	0.258231
98	AA452909*25G5	nuclear receptor subfamily 2, group F, member 1 NR2F1	Hs.519445						-0.494734	-1.07598	-0.406339	-0.98165	-0.791741	-0.428058	-0.262322	-1.66852	-0.711546	-1.04516	-0.154681	-0.240038				-0.449699	-0.658768	-0.578274	-0.447636	0.13342	-0.288853	-0.337445	-1.42895	-0.749597	-0.272548	-0.653527				-0.305606	-0.804473	-0.35344	-0.182664	-0.989411		-0.550781	-0.278538	-1.18337	-0.341539	-0.669973	-0.430387
99	AA449742*25G9	coagulation factor XIII, A1 polypeptide F13A1	Hs.80424						5.45695	3.54043	5.14763		3.1088	2.59146	4.00516	4.97558		3.08935	4.41142	0.451852				4.4124	4.07035		4.83635	3.04272	1.52386	4.26363		2.47841	2.62536	2.68669	1.52454				4.91815	3.78423	3.50106	3.17343	1.70316	3.07541	1.92005		3.14766	3.23103	2.45672
100	T68092*26G1	RNA binding motif protein 10 RBM10	Hs.154583						-0.952615	-0.417493	0.0570533	0.429589	0.228754	0.0940953	0.144067	0.162332	-0.0625423	0.00999292	0.150048	-0.310884			0.251314	0.525542	-0.177042	0.172119		-0.1935	-1.03638	-0.541337	-1.81261	-0.293039		-0.454503	-1.1547			-0.108782	0.277233	-0.825282	-0.906016	-1.5707	-0.0493864	-0.536164	-1.04832	-1.2671	0.24093	1.02226	-0.189206
101	AA487590*26G5	hypothetical gene CG018 CG018	Hs.22174						0.511586	1.24875	0.508147	0.988897	0.763547	0.931499	1.14366			0.942706	1.19589	0.0800542				1.16251	0.888523			0.378963		0.8174	2.35051	1.21688	-0.0344677	0.611633	-0.829543			0.838825	0.936757	-0.190162		0.899289
102	R95740*26G9	paraoxonase 3 PON3	Hs.296259						-0.10795	-1.08186	0.371663	-0.418328	0.0986296	-0.459051	-0.523221	-0.240214		0.0586647		-0.179625				-0.208323	0.660091	-0.555551		1.02301		-0.504333	-0.571328		0.067702	-0.433016	0.239015				0.234317	-0.518911	-0.216387	-0.474901		-0.66857	-0.720231	0.572344	-1.56626	-0.194074	0.401875
103	T64930*27G1	hypothetical protein IMPACT IMPACT	Hs.284245						1.04544	-0.00648276	-0.168162	0.604247	0.192453	-0.16061	0.32738	-0.0210252		-0.798579	0.241239	0.00851549				-0.448396	0.25225	0.258817				-0.873277	-2.12957	0.462838	0.519525	-0.582244					-0.761576	0.114832	-0.545785	-0.683051		-0.350493	-0.370664	-1.9269	-0.0119789	-1.09461	0.821091
104	R99331*27G5	similar to F10G7.10.p KIAA2024	Hs.318402						0.325321	-0.423148	0.196678	0.577047	0.0246359	0.452988	0.483462		-0.0826621	-0.317142	0.22793	-0.0984324				0.16286	0.346516	-0.00599092	-0.388019			-0.13342	-0.777286	1.20072		0.316948	0.273131			0.870627	0.815702	0.487583	0.456524	-0.490482			0.269778	0.581844	0.648625	-0.210017	0.394789
105	N69388*27G9	chromosome 14 open reading frame 133 C14orf133	Hs.16157						0.17789	1.14649	0.401695	0.884551	0.848605	0.57828	0.827421		0.630465	0.385918	0.319379	-0.159532				0.264859	0.175809	1.0514	-0.331318	0.233602	-0.134787	0.291834	0.0338445	0.50973	0.396474	0.517387	-0.242093			0.856271	0.477741	0.245946	-0.222914	0.325068		0.0392198	-0.1185	-0.0733514	0.567498	-0.861806	0.200852
106	T98298*28G1	putative membrane protein LOC54499	Hs.93832						-0.0420451	0.416039	0.11778	0.60836	0.200493	0.818308	-0.166066	0.520024	0.139697	0.223374	0.206348	0.214354			-0.247387	1.09843	0.271297	0.723761	-0.184694	0.631742	-0.638632	0.90383	0.491713	0.187104	-0.226173	0.000554551	-0.113669			0.892936	0.116488	0.00477517	0.0260368	-0.0987394	0.0170962	-0.265013	0.454493	1.56403	-0.0778063	-0.0426801	0.338629
107	R33005*28G5	likely ortholog of mouse polydom POLYDOM	Hs.271350	0.0936872	-1.3243	-0.264299		0.403962	0.668222	0.29462	-0.0735818	1.01216	0.871378	0.112093	1.06014	-0.425128	-0.170282	0.00536685	0.341324	0.571637	0.677032	0.336821	0.949872	1.14928	0.899486	1.32456		0.562842	-0.891341	0.653364	-0.215835	0.609161	-0.692712	0.0174829		0.823985	0.103252	0.865896	0.57828	1.25277	0.118989	0.49082		0.723944		-0.38771	1.45336	0.961221	0.508497
108	T97900*28G9	Wolf-Hirschhorn syndrome candidate 1-like 1 WHSC1L1	Hs.27721	0.0171879	0.200819	-0.364475		-0.0333993	0.390625	0.618859	0.301731	0.468596	0.157296	0.328185	0.511159	0.290496	0.057336	0.00894704	0.724349	0.266283	0.326781	0.311386	0.110383	-0.0696788	-0.255091	0.757896	-0.346716	0.304575	0.0998549	0.0635084	0.289	-0.474333	-0.331244	0.517708		0.274157	0.675607	0.120359	-0.0157354	-0.240869	-0.269196	0.447352		0.209376	-0.125268	0.17759	0.436895	-0.0525166	0.803223
109	R73402 | AI668571*29G1	R73402 | AI668571	Hs.64173																																										0.00958764
110	R00047*29G5	prothymosin, alpha (gene sequence 28)	Hs.250655	-0.584798				-0.169906	-0.167355	0.0378276	1.74985	-0.10156	-0.195236			0.103123				-0.0850569		-0.604047		0.0596918				0.0225499	0.143273	0.0532107	-0.067478			0.087719		-0.800628	-0.433879	-0.810215	-0.529317	0.554069	-0.214621	-0.407449	-0.0559519	0.684289	-0.341704	0.0284248	0.389559	0.0126406	-0.716642
111	T98394*29G9	solute carrier family 7 , member 7 SLC7A7	Hs.194693	0.477671	0.135706	0.157222	1.78898	1.20564	0.418569	0.948114	0.136899	0.716132	0.25348	0.89504	0.847953	0.936446	1.2178	0.97939	0.547785	-0.13382	0.32706	0.401038	0.9981	0.615497		-0.300204		0.447139	1.29987	1.02543	0.903334	0.740822	0.586727	0.62894		0.1617	0.545425	0.940333	0.770918	0.818199	1.04216	1.8834	1.32107	1.5935	0.834976	0.89796	0.420564	-0.220504	0.288185
112	N66852*30G1	ESTs, Highly similar to 2206380B origin recognition complex subunit N66852	Hs.47501											-0.440094	0.155641		1.73861	0.498536																0.753275													0.688454	0.639807
113	N20036*30G5	ATPase, H+ transporting, lysosomal 70kDa, V1 subunit A, isoform 1 ATP6V1A1	Hs.281866	0.257786	0.324592	0.0338837	0.268479	0.0948897	0.59247	0.0484497	-0.121915	-0.263468	-0.0804571	-0.264706	-0.283098	-0.216776	-0.0902781	-0.439503		-0.523797	-0.452496	-0.43144	-0.309447	-0.0160147	-0.0754887	-0.233597	0.059219	-0.418514	0.604036	-0.206052	0.457431	0.253792	0.0622763	-0.299033	-0.567155	-0.240888	-0.777232	0.254849	0.180807	0.4001	0.251105	0.127637	0.21289	0.389806	-0.00250614	-0.0709952	-0.0901178	-0.199113	0.0674738
114	AA070026*30G9	potassium large conductance calcium-activated channel KCNMA1	Hs.89463	0.109239	0.389756	0.0458926	-1.31359	-0.167738	-0.216711	0.689487	-0.113516	0.115656	1.57112	0.323796	-0.290111	0.231375	0.412565	0.152615	0.296907	-0.378348	0.000698576	0.150951	-0.176767	1.09324	0.917331	0.41431	-0.321216	-0.540711	1.04108	0.841506	-1.41752	-0.28725	0.264515	0.133005	-0.400217	0.331167	-0.525335		-0.868068	0.147223	0.227	1.02032	-0.0807637	-0.245329	-0.170555	0.240106	-0.775725	-0.41204	-0.631019
115	T70346*31G1	DEAD/H (Asp-Glu-Ala-Asp/His) box polypeptide 16 DDX16	Hs.12797	-0.387257	-0.103857	-0.530901		-0.37805	-0.743866	0.58598	0.141985	-0.212363	0.41029	-0.107728	0.0153665	-0.31408	0.0162241	-0.666908		-0.463311	-0.152397	-0.303947		-0.027957	-0.316738	-0.131643	-0.261246	-0.337476	-0.375415	0.237362	-0.469838	0.316271		0.0402352		-0.371524	0.0142066	0.0137315	-0.0351512	0.0519049	-0.271959	-0.0632712	-0.522244	-0.34099	0.243167	-0.558161	-0.267525	-0.123482	0.065442
116	N78843*31G5	peptidylprolyl isomerase E (cyclophilin E) PPIE	Hs.33251	-0.381464	0.00605822		0.0397207	-0.0115536	0.235954	0.143121	0.823431	-0.227187	0.0988649	0.460927	-0.256839		0.0798373	0.470848		-0.112833	-0.318978			0.166224				-0.253189	0.428869	0.192787	-0.213133	-0.153997		0.00971613		-1.13808	-0.248972	-0.324383	-0.150258	0.0848159	1.03268	-0.191409		0.480494		0.107893	-0.0995363	-0.147662	0.115514
117	R63543*31G9	p75NTR-associated cell death executor; ovarian granulosa cell protein (13kD)	Hs.17775	0.110292	0.227713	-0.0333755	-1.35582	-0.131301	-0.221555	0.958448	0.0394145	0.123902	1.77202	0.511622	-0.258982	0.55633	0.568439	-0.292364	0.309696	-0.484905	0.000915701	0.0669186	-0.239059	1.29449	0.81816	0.876552	-0.524568	-0.586621	0.951951	1.11646	-1.89317		0.165371	0.0378301	-0.378806	0.217691	-0.717262	0.421715	-1.47631	-0.0165764	0.13577	1.0573	-0.0444008	-0.19638	-0.225225	0.277198	-0.987386	-0.41871	-0.579809
118	T64878*32G1	peanut-like 2 (Drosophila) PNUTL2	Hs.307091						-0.435121	-0.364726	0.260741	0.0474543	0.224794	-0.377959	-0.464785			-0.207719		-0.220651				-0.238595				-2.63071		-1.20432				-0.649926				-0.0154889	0.126387	-0.167671	-0.286665	0.13334					-1.37052		-1.26495
119	N69291*32G5	scavenger receptor cysteine-rich type 1 protein M160 M160	Hs.49636						-0.197171	0.637312	2.38718	-0.638128	0.20502	-0.408063	-0.0106993	0.89128		0.072605	-0.770735	0.261671				-0.267345	0.340674	-0.397363		-0.731979	-0.117604	0.375347	-0.465919	-1.19434	0.0942933	0.285368				0.903895	-0.689387	0.488025	-0.220907	-0.142434		1.54223		0.433316	-1.18612	-0.171515	-0.130533
120	R99935*32G9	3'-phosphoadenosine 5'-phosphosulfate synthase 2 PAPSS2	Hs.274230						0.405617	0.416433	0.218361	-0.0442446	0.419937	0.125129	0.110053	0.550923	0.659593	0.508561	0.414605	-0.0371977				0.493437	0.275615	0.0164837	0.902015		0.67537	0.802869	0.252396	0.242731		0.332879				0.337212	0.509872	0.430093	0.685277	0.48791	1.14188		0.415539		0.11958	0.975715
121	R33103*55G1	KIAA0610 protein	Hs.118087						-0.00587157	0.0360911	-0.468178	0.381461	-0.142943	0.337272	-0.208651	0.683255	0.667077	0.0967385	0.585889	0.253795				-0.361954	0.527903	0.18763	-0.0877	-0.0208579	0.259732	-0.745294	0.774678	-0.0183663	-0.315442	-0.0025185	-0.187927			-0.622475	0.757215	0.630747	0.531082	-0.296352		0.580317	0.55652		-0.594983	0.400313	0.186009
122	W73811*55G5	PCF11p homolog PCF11	Hs.123654						-0.38049	-0.0821032	0.341006	0.522484	-0.212338	0.593304	0.0891127	0.446141	0.547791	0.263699	0.588074	0.214315				0.357603	0.539319	-0.378403	-0.170684	0.321628	0.18352	-0.262651	0.413835	0.110205	0.710412	0.328663	-0.443549			0.105268	-0.448799	0.381017	-0.36312	-0.220651		0.544964	0.271335		0.473412	0.461526	0.436578
123	W04668*55G9	hypothetical protein FLJ14600 FLJ14600	Hs.100861						0.0387288	-0.340394	-0.00761094	0.379413	-0.200499	-1.12713	0.38668	0.337405	-1.92928	-0.103908	0.650437	0.51821			-0.103657	-0.0110235	0.258658	-0.253562	-0.314657	0.0147513		0.493283	-0.221679	0.296069	0.230087	-0.116331				-0.136676	0.0964531	1.07711	0.136372	-0.387224			-0.0847052	-0.300036	0.86214	0.550726	0.477513
124	AA431206*56G1	amyloid beta precursor protein (cytoplasmic tail) binding protein 2 APPBP2	Hs.84084						-0.00220805	-0.230197	-0.357462	-0.273337	-0.189433	0.51464	-0.238626	-0.35542	-0.441496	-0.39321	0.200515	0.419116			-0.479812	-0.188982	-0.20867	-0.270612	-0.648194	0.105199	-0.175264	-0.510388	0.0220966	-0.252194	-0.0583977	-0.624321	-0.226183			0.296268	-0.566137	-0.242264	-0.0528894	-0.7298	-0.461316	-0.504172	0.185886	-0.327797	-0.558907	-0.486703	-0.173325
125	H82532*56G5	ESTs, Moderately similar to FRG1_HUMAN FRG1 protein H82532	Hs.288925						-0.627207	-0.0980761	-0.177137	-0.14654	-0.829775	-0.185894	-0.436257	-0.226147	-0.454789	-0.423705	1.15754	0.248113			-0.397741	-0.360259	-0.0218073	-0.312363	-0.569732	-0.232078	-0.050257	-0.453685	0.65909	-0.914138	-0.0937863	-0.520266				-0.554193	-0.228548	-0.632955	-0.199716	-0.806795		0.353588	0.375073	-0.681024	-0.232885	0.0506684	-0.0585501
126	N29431*56G9	NY-REN-18 antigen	Hs.279780						-0.0389199	1.23718	0.735002	0.787337	0.558627	0.56107	1.06348	0.898359	0.593455	0.561072	0.749789	0.369749			0.612703	0.248804	0.743786	-0.211905	0.0720054	0.425264	0.49874	0.840513	0.977155	0.687965	1.00754	0.260547				0.546776	1.21954	0.777307	1.11793	0.882855		1.13854	0.539944	-0.162974	0.534283	0.639855	0.558775
127	W88572*57G1	erythrocyte membrane protein band 4.1-like 2 EPB41L2	Hs.7857						-0.312757	-1.33865	-0.459721	-1.41266	-1.27116	-1.44985	-1.56666	-0.974289	-1.17809	-1.31221	-0.585188	-0.132264			-0.486287	-0.795015	-0.464833		-0.760377	-0.432608	0.0274183		-1.74641	-1.33293	-1.17154	-1.02203				0.137252	-0.142619	-0.772594	-0.024665	-0.585797	-0.60258	0.0217143	-1.07181	-1.61228	-1.2638	0.364806	-1.24247
128	N72215*57G5	prosaposin PSAP	Hs.78575						0.196717	0.197101	-0.38372	0.329239	0.141217	0.398262	0.450867	0.859009	0.376105	0.685317	0.879481				0.571063	0.532083	0.335417	-0.026825		0.277798	1.23854	0.63209	-0.014615	0.833912	0.257125	0.319632				0.512504	0.764476	1.20151	0.47196	1.7931	1.30704	1.19896	0.509386	0.515641	-0.0319413	0.473596	0.00151938
129	W86431*57G9	serine (or cysteine) proteinase inhibitor, clade A , member 5 SERPINA5	Hs.76353							-1.8339		-2.06984	-1.97067	-1.88404	-2.56812	-1.9291	-3.18481	-1.18008	-2.04759	-0.397723			-1.25758	-0.266978	-1.03435	-0.792066	-1.73315	-2.62203	-1.35579	-2.55175	-3.57393	-2.5305	-2.43814	-1.51207				-1.48116	-1.05287	-1.88475	-2.18691	-1.93828	0.123444	-2.43419	-1.72156	-3.2242	-3.71811	0.698143	-2.4845
130	T69709*58G1	T69709							0.238232	-0.649711	-1.15524	-0.419922	-0.406748	-0.419103	-0.648216	-0.389999			0.163069	0.194081			-0.232605	-0.506307	0.0727009		-0.565961	-0.403256	0.267741	-0.467688	-0.377391	-0.82862	-0.417362	-0.479085				-0.277719	-0.0492892	0.18671	-0.540831	-0.352472	-0.629742	-0.771779	-0.11711	0.30791	-0.703835	-0.551866	-0.179567
131	N29545*58G5	chromosome 20 open reading frame 155 C20orf155	Hs.3569						0.71829	-0.154632	-0.311721	-0.340355	-0.162782	0.269682	0.00306683	-0.209432	0.247869	0.069038	-0.110194	-0.176787			-0.387723	0.383099	0.445428	-0.225042	-0.0894235	0.445159	0.27983	-0.333335	-0.140182		0.143107	0.195458	-0.30247			0.239296	-0.277636	-0.380977	0.433414	-0.287678	-0.119829	-0.0841177	-0.0937456	0.424252	-0.00562259	-0.153066	-0.447975
132	H96990*58G9	ESTs H96990	Hs.3772						-0.183136	-0.063983	-0.368909	0.167474	-0.362528	-0.225555	-0.167334	0.181989	-0.0871821	0.237592	0.463921	0.218128				-0.202612	-0.185758			-0.245869	-0.329888	-0.332377	-0.104608	-0.755145	0.108028	-0.808199				-0.631707	0.276622	0.383281	0.884702	-0.334111		0.295124	1.25933	-0.110677	-0.902769	-0.401447	-0.669062
133	N52970*83G1	chromosome 14 open reading frame 24 C14orf24	Hs.281434						0.806944	0.750686	0.731042	0.496443	-0.173808	-0.0814197	0.201552	-0.198812	-0.208172	1.61385	0.886756	-0.1744			0.281453	-0.607901	0.217688	-0.186616	0.588224	-0.274693	-0.321708	-0.661108	0.935736	0.223618	0.981017	0.28204	0.138258			-0.166402	0.787012	0.868612	0.313962	-0.257255	0.0351224	0.187179	0.000188593	-0.637671	0.402841	0.445323	-0.170821
134	R74478*83G5	ESTs, Weakly similar to POL2_MOUSE Retrovirus-related POL polyprotein R74478	Hs.107205						-0.326548	-0.89715	0.220032	-0.0396769	-0.607322	-0.583543	-0.156672		-0.347681	-0.455326	0.925386	0.0383687				-0.314495	0.187243		-0.0488242	-0.244962	-0.761805	-0.661317	0.358037	-0.689487	-0.105883	-0.596774				-1.6615	-0.156316	-0.592237	-0.204088	-0.80301		0.413222	0.454311	-0.535858	-0.271051	0.112275	0.0428627
135	N40959*83G9	CSRP2 binding protein CSRP2BP	Hs.301532						-0.317354	-0.00229743	-0.129279	-0.510539	-0.55581	-0.238868	-0.419695	-0.2515	-0.148441	-0.350696	-0.575237	-0.531596			-0.888594	-0.546956	-0.213064	0.175106	-0.432218	0.00359889	-0.112635	-0.51891	-0.207732	-0.143289	-0.227871	-0.259032	-0.202097			0.106714	-0.167625	-0.568676	-0.448798	-0.59092	-0.367152	-0.378326	0.2837	0.127746	-0.0127686	-0.161504	-0.215565
136	H71230*84G1	KIAA1321 protein KIAA1321	Hs.24336						-0.930951	-0.404782	0.945335	0.0985424	-0.733063	-0.348881	-0.0163941	-0.258989	-0.461912	-0.69107	0.0833785	-0.200468			-0.785596	0.0452147	-0.170587	-0.196304	0.126893	0.213211	-0.683626	-0.218062	0.606183	-0.17284	-0.00203524	-0.533641	0.262798			0.318345	-0.43821	-0.396135	0.196285	-0.403085	-0.399713	0.11919	-0.0937815	-0.335364	-0.210004	0.000899253	-0.0340686
137	H93115*84G5	H93115	Hs.269020						0.729596	-0.0271722	1.08665	0.758875	0.604872	0.862683	0.763995			0.873714		0.332572					0.933941	-0.154834	0.867633	0.847263	0.0503001	0.583462	1.33959	0.601953	0.0167871	-0.48417	0.76074					-0.120565	0.610487	-0.377549		0.88292	0.357576	1.61679	1.14282	1.38962	0.975595
138	N38787*84G9	ESTs N38787	Hs.108029						-0.338281	0.0632631	-0.0282521	0.0128071	0.00422969	0.559207	0.26167	-0.157891	-0.0585881	0.0158878	-0.0716512	0.37664	0.579977			0.114589	0.662795	-0.369309		0.289768	-0.232578	-0.0226805	0.454746	-0.160506	0.266912	-0.0778577	0.645619			-0.196824	0.50738	-0.311907	0.864752	-0.057787		-0.0540533	0.0602348	0.135895	0.100558	0.00271693	0.55879
139	H92965*85G1	ESTs H92965	Hs.134463						-0.256683	-0.13455	0.307833	0.323429	-0.0244284	0.28903	0.384741	0.188961	-0.465316	0.282994	0.220276	-0.00159533				0.322071	0.19914		0.561147	-0.0102427	-0.105916	-0.0268945	0.473298	-0.265467	0.849343	-0.325777	0.206991			0.0292973		-0.0323375	0.621463	0.0646843		0.103116	-0.816387		-0.739783	-0.240097	-0.0865798
140	H94063*85G5	chromosome 13 open reading frame 1 C13orf1	Hs.44235						0.652659	-0.605904	-0.951925	0.298737	-0.094618	0.0431685	-0.751343	-0.742142	-0.197536	-0.116938	0.207114	0.109353				0.27789	0.076266	-0.398234	-0.219615		0.169393	0.466343	-0.0836437	0.474618	1.17059	0.256645	-0.336669			-0.38805	0.623699		-0.121034	-0.25553		-0.457103	-0.0468089	0.211268	0.281362	-0.29551	-0.283258
141	H94739*85G9	DKFZP566C0424 protein DKFZP566C0424	Hs.226770						-0.0294201	0.301052	-0.451825	-0.589313	0.24441	-0.171916	-0.278532	0.162617	0.365852	0.406333	-0.0138354	-0.491546			0.181927	0.0492656	0.391725	-0.168829	0.10542	-0.359813	-0.152381	0.182074	0.10058	-0.231555	0.692993	0.565107	0.00184763			0.682208	0.322616	-0.0664207	0.13354	0.153966	0.0422531	0.219058	0.016368	0.385335	0.0911735	0.126441	0.0901198
142	R91570*86G1	signal transducer and activator of transcription 4 STAT4	Hs.80642						-0.431106	-0.424581	-0.158334	-0.369467	-0.204253	0.0818672	-0.00151148	-0.075544	0.0612436	-0.000102577	-0.25057	0.0228677			-0.0396584	0.228557	0.0162339	-0.239033	-0.658767	-0.218308	0.0954269	-0.25107	0.0859611	-0.591742	0.840564	-0.341214				-0.173517	-0.196575	-0.130447	0.0747134	-0.219668		0.0501564	-0.363811	-0.41042	-0.195986	-0.249647	0.111627
143	AA663884*86G5	synaptosomal-associated protein, 25kDa SNAP25	Hs.84389						-1.26984	-2.29577	-1.52575	-0.0563845	1.33314	0.246932	1.5725	0.945006	1.8648	1.16061	-0.358415	0.209834			-0.359203	-0.312116	-0.629704	-0.0225902	0.236536	-0.984721	0.668581	0.661512	-0.333372	-0.521575	1.11765	-0.192677	0.809535			2.05518	-0.444217	-0.157721	0.524837	-0.86162	-0.496642	-1.13285	0.112016	0.23132	0.382224	-0.297811	0.205204
144	H95960*86G9	secreted protein, acidic, cysteine-rich (osteonectin) SPARC	Hs.111779						-0.232469	-2.26118	-3.02598	-3.53738	-1.92792	-2.41337	-2.86226	-2.98127	-1.17196	-2.88135	-0.719678	-2.16745			-2.13356	-2.00285	-2.9366	-1.63856	-2.06376	-2.16204	-1.50143	-2.95844	-2.63566	-2.54271	-1.23781	-1.33962	-1.50841			-1.16992	0.211632	-1.39886	0.232899	-0.492269	-0.719432	-0.93575	-1.08611	-2.02928	-2.64228	-1.95968	-2.20997
145	AA425450*87G1	glycoprotein (transmembrane) nmb GPNMB	Hs.82226						1.6312	-0.305668	-0.528566	-2.52269	0.879432	0.995838	-0.17626	-1.56764	-0.298894	0.722173	-1.17304	-0.282095			-1.38364	-0.806151	-0.841412			-1.77415	1.16386	0.070411	-1.67625	-1.12475	-1.10727	-0.257961				3.58673	0.495607	0.63899	2.57507	1.73961	3.75998	1.73342	2.21309	-0.695376	-1.85955	-0.796372	-0.185878
146	AA401428*87G5	nucleoporin 214kDa NUP214	Hs.170285						-0.0334863	0.400324	0.523369	-0.61426	-0.476164	-0.545982	-0.752058	-0.277292	-0.81759	-0.434027	-0.425517	-0.478122				-0.556075	-0.293429			-0.687035	-0.30167	-0.158689	0.109427	-0.391289		0.0942464				-0.256126	-0.0601297			-0.0170261	-0.220565		-0.222542		-0.112518	-0.416451	0.34387
147	AA703058*87G9	myeloperoxidase MPO	Hs.1817	-5.97219	-5.48604	-4.77332	-5.31496	-5.74947	-4.76303	-4.75839	-5.92299	-5.78133	-5.36111	-5.3372	-6.17367	-5.41412	-5.34795	-4.87327		-4.06058	-6.72109	-5.97613	-4.77472	-5.73768	-4.01667	-1.91655	-4.09885	-5.65807	-5.32832	-5.94636	-5.81106		-4.80226	-4.48579	-5.10156	-5.91012	-6.32459	-6.36401	-5.13377	-5.2381	-4.96113	-5.46117	-4.73684	-5.67638	-5.09981	-5.41916	-5.92798	-5.21163	-5.19709
148	AA670215*88G1	tumor susceptibility gene 101 TSG101	Hs.118910	-0.753394	0.428489	-0.23447	0.170923	0.21942	-0.259277	1.09864	0.124226	-0.418829	0.356699	-0.180251	-0.791616	0.125722	-0.103565	0.116136		0.113417	0.107167	-0.670387	0.0640869	-0.0826252	-0.406922	-0.0697407	-0.21869	-0.715057	-0.207347	0.189719	0.754803	-0.431633		-0.490764		-0.243931	-1.09534	-0.888876	-0.0501568	-0.104115	-0.282939	-0.599244	-0.597781		0.144692	-0.140538	-0.138426	0.130957	-1.20764
149	AA099534*88G5	activated RNA polymerase II transcription cofactor 4 PC4	Hs.74861	-0.157459	0.880017	-0.573077	-0.606816	-0.570043	-0.324661	-0.313352	-0.269067	-0.49398	-0.441555	-0.358451	-0.466344	-0.276536	-0.179678	-0.831774	0.401762	-0.414161	-0.260914	-0.627559	-0.66506	-0.535766	-0.385411	0.0962811	0.166749	0.0840237	0.376077	-0.566666	0.0613666	-1.15899	0.804432	-0.60721	0.316945	-0.544688	-0.242282	-0.384314	-0.23938	0.115074	0.026446	-1.01278	-0.79561	0.0258775	-0.252116	-0.488254	-0.724584	-0.0969093	-0.841815
150	T72202*88G9	signal transducer and activator of transcription 6, interleukin-4 induced STAT6	Hs.181015	0.0902597		0.392233	0.538896	0.547078	0.0137146	0.448478	0.195178	-0.462921	0.28962	0.128906	0.00751688	0.339409	0.5189	-0.416348	0.108865	-0.392476	-0.0826438	0.179434		0.362719	0.572466			0.459162	0.388435	0.519059	0.520274	0.488744	0.472559	0.831575	0.0803732	0.0699851	0.27789	0.0373959	0.216612	0.377364	0.114431	0.363657	0.152613	0.256272	0.646492	0.773076	0.21618	0.406492	0.290248
151	W80637*89G1	W80637		-0.879348		-1.00717	-0.994175	-0.0956326	-0.852139	-1.99001	-1.15115	-2.3095	-1.56605	-1.7738	-2.03439	-2.85879	-2.38383	-0.805081		-0.729666	-2.30164	-1.34092		-1.89057	-3.02998	-0.357791		-1.24928	-1.56779	-1.28216	-2.03805	-1.03381		-0.47467		-1.37697	-0.537036	-2.76525	0.0830155	-1.45357	-1.68772	-1.89219		-2.40139	-0.0996316	-1.81802	-1.50514	-0.609084	-1.15039
152	R48132*89G5	SH3-domain binding protein 2 SH3BP2	Hs.167679	-1.25656				-0.451981		0.142604	0.0154573	0.0636862	-0.341717	-0.62069	0.410301			0.150734		-0.222239	0.864787	-0.293651		0.114633	-0.63239			0.416788	0.296374	0.433568	0.104123	0.00615884		-0.572443		-0.220674	0.536969	-0.128084	-0.503965		0.453595	-0.766997		0.134814	0.838679		0.348245	0.43447	-0.351306
153	AA426039*89G9	KIAA0391 gene product KIAA0391	Hs.154668	-0.898345	-0.253233	-0.461796	-0.843203	-0.102446	-0.367146	-0.420616	0.460482	-0.0684787	-0.892338	-0.955393	-0.390542	-0.119541	-1.87089			-0.175782	-0.158451	-1.24988		-0.744266	-1.14637			-0.337507	-0.766079	-0.757603	0.235681	-0.222288		-1.3468		-0.169978	-0.51156	-2.57989	-0.633141		0.210647	-0.888199		-0.556	-0.389515	-0.222976	0.245574	-1.02208	-0.436547
154	AA427561*90G1	heparan sulfate proteoglycan 2 (perlecan) HSPG2	Hs.550478		-0.629531			0.378292	0.0912157	0.769493	-0.2343		1.24861	0.23151	-0.0437366	-0.00652341	1.2403	-0.590883			0.334011	1.66701						-0.548445	0.835704	1.01092	-0.208446	-0.411246				1.03443	0.915318		1.61665	0.391989	-0.119905	1.58207		0.244591	-0.0710739	0.222538	0.28646	0.382562	-0.0452418
155	R44776*90G5	glutamate receptor, ionotropic, kainate 1 GRIK1	Hs.181581						-0.598111																			0.588399		2.00671												-0.287689					1.13272
156	AA630298*90G9	PTK2 protein tyrosine kinase 2 PTK2	Hs.740	0.363995	1.25652			0.275071	-0.0190234	0.623284	0.229625	1.06177	0.94481	1.12396	0.353866	1.1132	0.705357	0.842923		0.0986786	1.23785	0.537424	0.630338	1.39662	1.22471	1.3651	0.61761	1.08791	0.999158	1.62649	1.76528	0.856145		1.10424	1.825	0.582612	1.24114	1.43827	-2.85e-05	0.83973	1.07755	0.491082	-0.097016	-0.304263	0.0416557	0.624843	0.899217	0.280056	0.480613
157	H25510*91G1	H25510	Hs.278468	0.389801	0.38244	-0.370712	0.104061	-0.267157	0.508885	0.0405422	-0.51318	-0.114381	-0.353849	0.402233	0.617646	0.293154	0.200036	0.182169	0.265917	-0.334645	0.70277	0.0948843	-0.730099	-0.125647	0.0958448	0.271975	0.440434	-0.314648	-0.669734	-0.560358	0.412652	-0.388338	-0.14648	-0.660983	-0.203406	0.0578306	0.291643	-0.0163108	-0.515713	0.11373	0.0282879	-0.831185	-0.378216	0.664503	0.471928	-0.670898	-0.32889	0.0176778	0.228485
158	R70505*91G5	purinergic receptor P2Y, G-protein coupled, 2 P2RY2	Hs.339	-2.29193			-0.0233082	0.497353		-0.838658	-1.53667	0.228953	0.280183	-0.508569	-0.258559		-0.200707	-0.368305		0.628157	-0.991359							-0.787129		0.8737	-0.349165	0.797825		-0.871995			0.222547		-1.77381	-0.0368097	1.05798	0.903037			-0.736668		-1.51901	1.06993	-1.30677
159	AA679278*91G9	nuclear factor of activated T-cells, cytoplasmic, calcineurin-dependent 1 NFATC1	Hs.96149	-0.123662	0.496339	0.324739	0.243952	-0.0373909	-0.21301	0.17604	-0.136692		-0.253154	-0.259954	-0.0830745			0.0954933		-0.0646302	-0.129936	0.0746937		-0.108956	-0.482869					-0.0116721		-0.599065		-0.505438		0.172222	0.145599	-0.56203	0.475283		0.278583	0.516246		-0.0325111	-0.218837		0.251519		-0.0796681
160	W86860*92G1	nuclear VCP-like NVL	Hs.58927	0.260682	0.334849	0.24033	-0.204692	0.248626	1.35762	0.600547	0.447462	0.367091	0.686606	0.630069	0.125438		1.06771	0.781864		0.167191	-0.0610942	0.130559		0.670188	0.774264	0.549129	-0.0290623	0.308175	0.349927	0.557904	0.650933	0.268027	0.516968	0.3725		0.112775	0.0562201	0.0461985	0.506556	0.266761	0.322374	0.152551		0.0639542	0.55839	0.640662	0.144969	0.290821	0.360476
161	AA496565*92G5	plexin B1 PLXNB1	Hs.278311	-0.0538915	0.382361	-0.170987	0.652248	-0.0167181	0.238069	1.35201	-0.330592	0.495264	0.731635	1.24561	0.501028	0.716098	1.54855	0.449584		0.265723	1.90787	1.07499	0.682388	2.24257	-0.0814486	0.230107	0.663547	0.457342	0.657219	1.16569	0.754895	1.30834		0.98565		1.26363	1.04541	0.494042	0.191309	0.304581	0.638262	0.60762		-0.73655	-0.221715	0.878675	1.23826	0.0464968	-0.612811
162	AA421783*92G9	zinc finger protein 263 ZNF263	Hs.182528	-0.462637	-0.200277	0.91833	-0.577267	-0.820169	0.818942	0.561045	-0.347224	-0.338725	-0.249345	0.507633	-0.177632	-0.246945	1.00849	-0.395158		0.248121	-0.180085	-0.166398	0.0822237	-0.258303	0.104715	0.184621	-0.74091	-0.0399406	0.0706699	0.336074	0.468125	0.321405	0.141953	0.321459		-0.167935	-0.432242	0.251509	-0.095267	0.0769502	0.176834	-0.373741			-0.0718337	0.729096	0.139492	0.400612	0.145126
163	AA045436*93G1	tripartite motif-containing 29 TRIM29	Hs.252229	0.859239	1.1648	3.02566	4.40531	2.11389	2.62977	0.864843	1.23452	2.07584	1.93649	2.21008	2.78595	3.33063	2.59163	3.01851	3.39597	0.85951	3.54272	2.8755	2.70219	2.4079	1.93385	0.786378		2.98789	2.41268	2.0827	2.11621	1.93582	2.23144	2.75275		3.11245	2.81078	1.3394	2.93566	3.19888	2.19775	2.88885	1.61801	2.48078	3.22122	2.52801	3.9915	1.60806	2.43702
164	N34974*93G5	ARP3 actin-related protein 3 homolog (yeast) ACTR3	Hs.5321						0.421902				-0.135938		-0.304792	0.667221		0.108159		-0.162019			0.141609	-0.171128						0.733284				0.0660266					0.559239	0.843246					0.432595
165	AA621019*93G9	Tax interaction protein 40	Hs.112933	0.0797932	0.611005	0.00093147	0.435179	-0.0992075	-0.0055683	0.133592	0.68752	0.089033	0.459624	0.576458	0.129866				0.317557	0.0362503	-0.243775	0.585684	0.473993	0.283323	0.548469	-0.198253	0.747066						0.476829	1.11242		0.105568	0.336166	0.359404	0.354596	0.484289	0.395721	0.348512	0.125993
166	AA669750*94G1	Homo sapiens (clone FS1) mRNA fragment. AA669750	Hs.283742	-0.0514461	0.474893		-0.748847	-0.731822	-0.113795	-0.910826	-0.387061	0.10905	-0.500545	-0.0734408	0.0895778				0.964447	0.0989173	0.555056		-0.53837	-0.00725002	0.152327	-0.187079	0.335476						-0.244272	-0.982888		-0.231676	-0.223209	-0.509746	-0.195752	-0.511036	0.104646	-1.11426
167	H03504*94G5	protein tyrosine phosphatase, non-receptor type 21 PTPN21	Hs.155693	0.479692	0.085726	0.504472	0.408663	0.908724	0.0615059	0.323132	0.306687	0.974013	0.266511	0.821346	0.739079	0.475732	0.537549	0.817492	0.855586	0.0122977	0.783512	0.558484		0.140217		-0.233428			0.335019	-0.120331	1.53607			0.501589		0.152294	-0.18787	0.0559227	0.0884386	0.664972	0.677237	0.659783			0.12388		0.913973		0.243641
168	AA291490*94G9	glucosidase I GCS1	Hs.83919	0.326167	0.095797	-0.0621364	0.344834	0.0709533	0.374416	0.61069	0.269803	-0.149798	0.134177	1.02248	0.290538	0.0029142	0.0238712		0.962718	0.269921	0.277749	-0.44645		0.281956		-0.285696		0.306944	0.61776	0.813063	0.393736	0.195757		0.592771		-1.21168	-0.0115463	0.226217	0.167954	0.313219	0.0521575	-0.0710848	-0.168083	-0.194566	0.308993	-0.0610348	0.112261	0.45158	0.658462
169	AA151065*SPADESD1	mitogen-activated protein kinase kinase kinase 5 MAP3K5	Hs.186486				-0.594877		-0.654902	-0.148054		1.53724	-0.0246374	-0.029677	1.07705	0.655452	0.742889	0.258666			1.51347								1.28187	-0.900507	0.508429	-0.301923												0.936396	0.0382948	0.505229	-0.572888	0.489398	0.0536463
170	AA608568*SPADESD9	cyclin A2 CCNA2	Hs.85137	-1.65248	-0.0562869	-1.08223	-1.3502	-1.02654	-1.22685	-1.24665	-0.965561	-3.3273	-2.93449	-1.27482	-1.39625	-3.69353	-2.38166	-2.61684	-2.98682	-3.71764	-3.91118	-1.08816	-2.32931	-1.83144	-0.781731	-0.899742	-0.962826	-0.67647	-0.251922	-2.06485	-0.811524	-1.30923	-0.904985	-0.971861		-1.27213	-0.80271	-1.73948	-0.879736	-1.04003	-1.32328	-0.559867	-1.79745	-2.08167	-0.536094	-0.803767	-1.39515	-0.225413	0.0378009
171	AA447515*SPADESD17	MAX dimerization protein 4 MXD4	Hs.102402	-0.197482	0.0579405		-0.207013	-0.474214	0.390872	0.164802	0.073094	0.17219	-0.00737282	-0.918792	0.567389			0.874295			1.00854	-0.224807		0.239584						-0.246874		-0.277522		-0.30233			0.83883		-0.0704332	0.304064	-0.1884	-0.81212	-0.0874598
172	R14663*SPADESH1	diphtheria toxin receptor (heparin-binding epidermal growth factor-like growth factor) DTR	Hs.799
173	N49284*SPADESH9	v-myb myeloblastosis viral oncogene homolog (avian) MYB	Hs.1334	-1.03914	-0.563375	-0.543457	-1.07101	-0.805068	-1.57597	-0.482418	-0.590303		-1.73172	-1.99939	-2.73292			-1.06612						-2.62152	-0.441926	-0.190341			0.551582	-1.79719	0.013507	-1.54145		-0.267858			-0.730534	-3.12715	-2.76527	-1.78164	-1.5792	0.0646848			-0.58433	2.48142	-1.4015		-0.385007
174	FK505*SPADESH17	FK505		-0.247045	-0.465651		0.0330148	0.468965	0.20885	-0.49586	-0.0838009	-0.33596	-0.427133	0.341424	-0.400661	-0.535766	0.699525	-0.645209			0.135321	0.263534	-0.360186	-0.210666	-0.706463	0.00332224		0.238559	-0.306492	-0.414138	-0.996876	-0.172657		-0.178165		0.0752577	-0.14745	-0.754572		-0.103128	0.537374	-0.0760277	0.36858	-0.865493	0.148546	-1.10944	-0.166341	-0.581642	-0.142354
175	T99653*SPADESL1	wingless-type MMTV integration site family member 2 WNT2	Hs.128553	0.919018	0.413134	0.0429298	1.30858	0.870959	0.615155	0.475485	0.177195	0.175595	0.409434	0.343513	0.0554529			0.302542	0.0127426	0.0620285	0.345241	0.780845	0.47459	0.874682	0.205586			0.222108		0.314752	0.354259	0.214534	0.482185	0.12336		-0.015269	0.129415	0.141153		0.228358	0.940058	0.875362		0.00220024	-0.196313	-0.261132	0.580561	-0.923861	0.466113
176	AA464630*SPADESL9	thrombospondin 1 THBS1	Hs.164226	-0.118602	-2.93624	-1.33322	-0.549757	0.13871	-0.159021	-2.18064	-1.57993	-2.06195	-1.84249	-2.66886	-2.83378	-1.92981	-1.87717	-2.22569	-1.5864	-1.9027	-2.48694	-0.607938	-1.01432	-2.85316	-2.42168	-1.64398	-0.662579	-3.09805	-1.80239	-2.61272	-2.18289	-2.84505	-2.20706	-1.36435	-0.479336	-1.68193	-2.62035	-1.7379	-0.855428	-1.60244	-1.14018	-1.30271	0.299382	-0.254408	-2.03348	-2.09642	-0.110062	1.01226	-1.68295
177	AA453789*SPADESL17	PTK7 protein tyrosine kinase 7 PTK7	Hs.90572	1.01743	1.30814	0.33707	0.500246	0.640908	0.554082	-0.0538815	-0.200652	-0.029412	0.105154	0.526851	0.0706596	-0.380639	0.319172	0.157314	0.335939	-0.50366	0.277458	0.872908		0.0407364	-0.074073	1.29958	0.119857	-0.252568	-0.751471	0.00122282	-0.650522	-0.567312	-1.07409	0.56761	-0.393298		0.291035	0.376315	0.0965888	0.389799	0.4023	-0.811723		-0.391454	-0.415159	-0.436449	0.698142	0.19586	-0.306217
178	empty	Data not found empty
179	empty	Data not found empty
180	empty	Data not found empty
181	AA018457*95G1	glutamate decarboxylase 1 (brain, 67kDa) GAD1	Hs.324784	0.874513	-0.530893	0.452959	-0.240469	-0.403388	-0.103747	0.0231704			-0.344738	-1.57946		-0.0109739	0.279622	-0.427513	0.161085	-0.312773	-0.617526	-0.307865		-0.696814	0.46271	-0.339424			-0.0313066	-0.207696		-0.295108	0.0552811	0.127656		-0.115036	-0.629237	-0.456894	-0.0181093							-0.360317	-0.931594	-0.0304815	-0.0706045
182	N62394*95G5	gap junction protein, beta 1, (connexin 32) GJB1	Hs.2679	-1.55588	1.22466	-0.15777	-0.706848	-1.40286	-0.544569	-0.162589	-1.84595	-1.55928	-0.256389		-0.83316	-1.66545	-1.51545	-0.441109	-0.917845	-0.0994813	-1.83261	-1.17788		-0.465832		0.0372376		-2.25773	-1.24374	-0.612883	-1.78699	-0.791056		0.156086		0.557218	-1.66845	-0.64571	0.974822	-0.752641	-0.106069	0.544065			0.645705	-0.239305	-0.790003	-1.4433	-0.680443
183	AA496032*95G9	phosphorylase, glycogen; muscle PYGM	Hs.154084	-0.486138	-0.100206		-0.189548	-0.0314011	0.0350505	-0.337224	0.214828	1.17525	0.278859	0.20432	-0.117149	0.145485	0.31803	-0.676182		0.370162	0.404894	0.267277	1.12869	0.201239					0.276375	-0.384427	-0.136248	0.288162		0.733192		0.151432	-0.306588	0.0129969	0.957346	0.0937664	0.383967	-0.466483		-0.374687	0.0594094	0.339627	0.0323654	1.45793	0.787097
184	W95001*96G1	cell division cycle 25C CDC25C	Hs.656	-1.11121	0.309913		-0.574938	-0.153697	-0.43716	0.172883	-0.0273207	-1.09983	-0.238374	-0.609372		-0.281388	-0.101502	-1.26605		-0.302054	-1.64693	-0.535284	0.300657	-0.259787		-0.385299		-0.0877376	0.253683	-0.60495	0.45292	-0.200253		0.449954		-0.623239	-0.737105		-0.236343	-0.538194	-0.793709	-0.0266493		-0.790746	-0.38204	-0.143063	-0.731691	-0.184207
185	AA644088*96G5	cathepsin C CTSC	Hs.10029	-0.144759	-0.26115	0.817722	1.42423	2.73395	0.861216	-0.311735	1.70373	0.171986	1.1176	0.375665	0.864989	0.618591	-0.203458	0.142343		1.12089	0.828207	0.276687	0.00213643	2.55472		-0.213559	2.21116		2.06785	1.11561	-0.178874	1.36658	1.06673	0.644391	0.0855583	1.71191	0.744614	1.36273	2.06078	0.0459993	1.31024	1.27595	0.830648	2.50265	1.17994	0.228574	0.171034	0.592131
186	AA625758*96G9	acidic (leucine-rich) nuclear phosphoprotein 32 family, member B	Hs.84264	-0.522429	-0.315968	0.845167	0.315391	0.134289		-0.602699	0.322527	0.557008	0.149321	0.16521	0.171099	0.55366	0.54847	-0.231977		-0.219221	0.686168	-0.474082	-0.34382	0.852389	-0.484412	0.491589	0.428702	0.636085	-0.261489	0.127005	0.159153	0.310128	0.470856	-0.548561	0.545724	0.0933143	-0.327458	0.759862	1.05032	-0.16226	-0.043742	-0.508455	-0.522085	0.112635	0.744424	-0.523075	0.24112	-0.124996	-0.249939
187	AA444009*97G1	glucosidase, alpha; acid GAA	Hs.1437	-0.217193	0.433466	0.282132	0.128534	-0.112154		0.270005	0.151002	-0.149806	0.198489	0.116551	-0.179832	-0.176132	0.135315	0.324189	-0.134083	-0.232597	-0.30523	0.131133	-0.18794	0.40426	0.37748	-0.138455	0.100559	-0.0305974	0.326392	0.327213	0.3579	-0.0951706	0.271457	0.114618	0.359985	-0.0565399	0.129252	0.425132	0.119577	0.0631539	0.038767	-0.0652614	0.51716	0.0541617	0.317898	0.219334	-0.179696	0.0336366	0.0233248
188	AA598814*97G5	ATPase, Na+/K+ transporting, beta 1 polypeptide ATP1B1	Hs.78629						-0.0785664	0.179914	-0.0553391	0.100926		-0.545782						-0.038922			0.061905	0.14828										-0.269157						-0.702675	-0.216042	0.0532838
189	H29521*97G9	ATP-binding cassette, sub-family A (ABC1), member 3	Hs.26630	-0.0531327	0.31449	-0.406775	-0.351069	-1.0705	-0.14148		-0.377555	-0.717867	-0.763091	-0.195367	-0.850092	-0.936518	-0.300577	-0.0608137	-0.548736	-0.614971	-0.827629	-0.35754	-0.47072	-0.491931	-0.620486	-0.369497	-0.544069	-0.433936	0.0224174	-0.528641	-0.285317	-0.0953188	0.0242347	-0.66829	-0.118007	-0.91941	-0.346716	-0.599668	-0.491833	-0.865126	-0.661662	-0.00778845	-0.281056	-0.644507	-0.274663	0.136365	-0.539296	-0.72743	-1.082
190	H12338*98G1	TYRO protein tyrosine kinase binding protein TYROBP	Hs.9963	1.15084	0.380502	1.05084	3.50987	2.4262	2.7537	1.2738	1.9717	-1.97091	-0.294486	-0.157533	1.39303	1.16303		-0.281417			-0.638916	1.5463	-0.211523	0.393322	0.0528904		1.6747	-0.970944	2.79424	1.04769	-0.646161	0.211771	0.276812	0.150599	0.0668902	-0.509423	-0.225035	0.690853	2.78225	1.28955	2.08942	3.19522	2.59455	4.00926	2.53811	1.71942	0.345009	1.69116	-0.0867072
191	N71695*98G5	NIMA (never in mitosis gene a)-related kinase 1 NEK1	Hs.48332	-0.0345803	0.894147	0.240546	0.0759404	0.121073	0.820632	0.423722	0.135227	0.65458	0.170843	0.37086	1.17435		0.542012	0.632394	1.22531	0.0171674	0.447931	0.0891388		-0.142599	0.585883	-0.16315	0.343183	0.515987	0.0358882	-0.0418075	-0.200597	0.0143423	0.724342	-0.179957		0.181782	0.549442	0.944541		0.746476	0.636887	0.351102		0.584935	0.566548		0.467521	0.543229	1.03487
192	AA446013*98G9	ribosomal protein L27a RPL27A	Hs.76064	-0.696115	-0.468436	-1.5352	-0.1855	-0.923901	0.0568557	-0.00971453	0.250651	-1.3677	-1.06765	-0.821698	-1.18082	-0.8284	-0.803874	-0.0793972	-1.40696	-0.362709	-0.909499	-0.843283		-0.62927	-1.26358			-1.58726	-0.860039	-0.57005	-1.18388	-0.654135		-0.596522		-0.889597	-1.14528	-0.849197	0.00619543	-0.921435	-1.00295	-1.0851			0.272039	-0.0248174	-1.07434	-0.539895	-0.513198
193	AA486765*107G1	Human DNA sequence from clone RP11-383C12		-0.0560275	-0.443086	0.140365	-0.451076	-0.139706	0.0605443	1.89005		2.37859	-0.15416	0.0691074	1.54759	2.33916	2.20347	1.46221	1.89505	0.35378	0.128433	-0.527843		-0.726163	-0.000414442			0.25466	1.15933	-0.179116		-0.317547	1.3816	0.386618		-0.242279	-0.474132		-0.520532	2.06097	0.966861	0.00570432					1.84248	-0.713689	0.229611
194	R53059*107G5	KIAA0972 protein KIAA0972	Hs.75264	0.251145	0.724982	0.0635486	-0.259121	0.0416429	0.0482261	-0.0224646	0.842854	0.724655	-0.726211	-0.471566	0.0428912		-0.436406	-0.341906	-0.0542212	0.319932	0.446987	-0.248258		-0.052708	-0.594515	-0.315512	-0.169262	-0.106673	0.16079	-0.908948		-0.0521242	0.287992	-0.585942		-0.144349	0.225776	-0.753919	-0.16369	-0.0218276	0.379149	-0.958822		0.0243726		-0.83933	0.150174	-0.51521	-0.600155
195	T48767*107G9	interleukin 10 receptor, beta IL10RB	Hs.173936	0.50153	-0.142302	0.322213	0.120585	0.369726	-0.328735	1.14835	0.0531098	0.482928	-0.2793	0.406062	0.78305	0.336481	-0.0798219	0.164798	0.237435	0.159798	0.768095	0.407984		0.696804	0.43973	0.0711181	0.834578	-0.260044	0.773022	0.840986	1.37279	0.0353299	0.439629	0.66217	-0.44591	0.873416	-0.0907849	0.127697	0.325158	0.311254	-0.0397571	0.661007	0.386789	0.774986	-0.470202	0.537235	-0.103077	0.0315879	0.43413
196	H29013*108G1	seizure related 6 homolog (mouse)-like SEZ6L	Hs.194766	-0.669531	-0.296718	-0.533787		-0.351984	0.121568	0.282714			-0.408634		-0.2905				-0.868093	-0.342229	-0.596505			-0.0466809				-0.0734739	0.403764	1.53167										0.587291		0.234431	-0.247962				0.24125
197	T49657*108G5	potassium channel, subfamily K, member 3 (TASK-1)	Hs.24040	0.240011		0.64436	0.147701	0.220283	-0.580171	0.178088	-0.0960243	-0.210977	-0.00914117	-0.28048	0.302203		0.399135	-0.0410459	-0.675934	0.110263	0.481499	0.408324		0.372219	0.497951	-0.242808	0.280505	0.0956751		-0.00660795	-0.158073	0.0814398	0.885501	0.421928			0.598178	-0.664476	0.200385	0.622046	0.18737	0.0381786			0.106083	-1.01257	-0.557087	-0.261373	-0.340443
198	T71889*108G9	seven in absentia homolog 1 (Drosophila) SIAH1	Hs.295923	-0.209372	-0.359915	-0.527184	0.00711121	-0.710923	-0.707593	0.0508318	-0.725907	0.807112	0.279391	0.981616	0.357583	0.119751	0.595179	1.265	0.904963	0.515638	0.92549	0.399008		0.203973	0.243804	0.812784	-0.0797604	0.437183	-0.468755		-0.126594	0.448798	1.1569	0.601394		0.913856	0.41552	0.309575	-0.162792	0.676688	-0.285562	0.647384		0.0696013	-1.11111	-1.01156	0.725638	-0.415258	-0.442942
199	AA680322*109G1	NADH dehydrogenase (ubiquinone) 1 alpha subcomplex, 4 NDUFA4	Hs.50098	0.225939						0.147525	-0.104147	0.653049		-0.0283917						0.144869	0.430238			0.331823						1.12688			-0.68064	0.643864								0.349244
200	AA419143*109G5	JTV1 gene JTV1	Hs.301613	0.455847	-0.228101	0.327516	-0.772111	0.675705	0.0619754	1.10371	1.61451	0.407392	2.04082	0.457484	0.65864	1.16572	1.03023	-0.00924109	0.346129	0.305631	0.993119	0.135031	1.35492	1.27277	-1.52437		0.293468	-0.0372203	-0.145373	1.85948	-1.40276	0.379089	-1.13428		1.31456	0.637048	0.554325	1.72898	1.16393	1.37283	0.864818	0.317165	1.0658	0.687491	0.569272	0.361431	0.576083	0.826602	0.381522
201	N26148*109G9	zinc finger protein 148 (pHZ-52) ZNF148	Hs.380334	-0.527056	-0.10333	-0.198748	0.0196656	-0.226803	0.158681	-0.896546	0.0620277	0.417362	-0.196947	0.031364	0.200483	0.195338	-0.0409999	-0.31889	0.612719	0.0588578	0.296903	-0.648511	-0.160602	-0.406607	-0.403421	0.154841	0.6836	-0.0912175	-0.0597494	-0.617535	-0.347648	-0.815676	0.247989	-0.184298	0.461162	0.00761676	-0.415258	0.37431	-0.0624807	0.342595	0.026398	-0.436404	-0.324101	0.35378	-0.241815	-0.952397	0.181079	0.0311443	0.0191189
202	AA401397*110G1	kallikrein 13 KLK13	Hs.165296	0.288907		1.49998	0.593425	0.575136		0.342153	0.513591		0.482596		0.313946				0.395679	0.184038	0.43867	0.29673				-0.547184				1.16658		-0.025547	0.571319	0.605742		0.667883	0.233739	0.333156	-0.367057			-0.0210157			0.555734
203	AA191019*110G5	putative DNA binding protein	Hs.31016	0.371424	0.812751	1.21242	0.487516	0.633224	1.61689	0.770468								1.36614		0.240362	0.420269			0.522811		-0.505486		3.36115		3.12106		1.87501		0.193365								0.702302				2.97824
204	AA133632*110G9	hypothetical protein FLJ21156 FLJ21156	Hs.26058					0.373311		0.383853	0.466957	0.656273				1.57399		0.502264		0.394302	0.240181		0.046131	0.1801		-0.431716			0.349559	1.0176	0.634914	-0.0375498		0.565223		0.746879						0.533144		0.231557	1.10871	1.83828	1.0774	1.00216	0.455808
205	H68838*177G1	nuclear receptor subfamily 2, group C, member 1 NR2C1	Hs.108301	0.243977	-0.00823359		-1.36402	-0.725798	-0.776339	-1.1213	0.38691	-0.0541733		-0.374228	0.598744	-0.147034		-0.571152		-0.0633078	0.0836696	-0.542224	-1.46012	-0.100193	0.131369		-0.145062	0.0671903	-1.01592	-0.508327	1.074	-0.207559	-0.911109	-0.836114		-0.441801	0.130353	-0.377625	-0.623883	-0.295516	-0.00888976	-0.520032		0.134485	-0.839089	0.281687	-0.368091	-0.520731	-0.647493
206	N55461*177G5	erythrocyte membrane protein band 4.9 (dematin) EPB49	Hs.274122	0.781886	0.122187	-0.848986	-0.236696	-0.204384	-0.359191	-0.288501	-0.104976	0.27098	0.0661463	0.197016	0.351602			-0.0881995		-0.0491123	0.706816	-0.196982	-0.28785	0.501465		-0.390961		0.60247		0.788337	1.19977	0.171925	-0.099759	-0.518786		-0.00639025	0.543293				-0.273263	-0.617007		0.0967853	0.727157		0.347373		0.725109
207	R72366*177G9	ORF LOC51035	Hs.77868	0.520135	0.255263	-0.298925	0.0727295	0.571724	-0.0331045	0.674765	0.595554	-0.163873	0.384299	-0.487543	-0.502945	0.451684	-0.184615	0.936767		-0.154443	0.300881	-0.00123749	0.732367	0.258189	-0.423231	0.630167	-0.250006	-0.757964	0.771635	0.460425	-0.647339	-0.106085	0.147327	-0.169748		-0.0533251	-0.628899	-0.329914	-0.265669	0.0338261	-0.953199	0.369731		-0.247212	0.217385	0.377315	-0.198066	-0.266225
208	AA707545*178G1	transition protein 1 (during histone to protamine replacement) TNP1	Hs.3017	1.55282	0.679893	0.0258936		0.0886682	0.264084	0.608689	0.26762	0.188693	0.251592	0.144577	0.119342			0.298713	-0.84179	0.230953	0.0582653	0.291823		0.767793				-0.220028		-0.00219975		0.237379	-0.111438	0.752125		0.342404	0.0507122			0.356405	-0.560564	0.468219		-0.513705	0.351436		0.837672		-0.523593
209	AA758082*178G5	YY1 associated factor 2 YAF2	Hs.180324	0.398093	0.3413	-0.510162		0.168114	0.61363	-0.704352	0.640652	0.67263	-0.0989974	0.586887	0.0533577			-0.0190139		0.00532551	0.126143	0.127677		1.11955	0.261709			1.26543	0.31268	0.935412	1.42545	0.604948		0.464115		0.851261	0.0787675		0.265076		0.965047	-0.0810526		0.644502	-0.027714		0.0446337		0.679783
210	AA725641*178G9	WD-repeat protein HAN11	Hs.176600	0.154681	0.740271	-0.458056	-0.119583	-0.23028	0.208869	0.739359	0.125484	0.182429	0.383083	0.0581697	-0.00853688	0.1186	0.457653	0.0266603	0.0836166	-0.0871378	0.0233116	0.231162	0.735329	0.369429	0.19996	0.888173		0.448428	0.102771	1.14036		0.912881	-0.128228	1.16911	0.136684	0.361159	0.0236564	0.959229	0.0953807	0.0284522	0.215898	0.651635	1.48681	0.360435	-0.242806	0.323268	0.603959	0.0368109	0.317574
211	AA016973*179G1	AA016973		-0.202093	0.516876	-0.819298	0.399624	-0.0889033	-0.436429	0.0435892	-0.685426	0.24589	0.461111	0.0963806	-0.443526	-0.783896	-0.370817	0.341542		-0.339996	-0.627271	0.703606		0.220751	0.653891	0.452949	-0.0624586	-0.106531	0.669667	0.456779		0.611664	0.0693468	0.145585	-0.020019	-0.428744	0.821062	-0.625026	-0.682936	-0.0283754	0.841298	1.71092	-0.828538	-0.409541	-0.649888	0.0263814	0.532627	-0.723615	-0.340653
212	AA708279*179G5	KIAA0426 gene product	Hs.97476	0.380512	1.44468	0.245417	0.385117	0.0938219	0.211645	1.21627	0.49159	0.0698164	0.16261	-0.250841	0.269157	1.51968		0.356231		0.300563	0.196984	0.23262		0.470723	0.578489		-0.485653	0.0889518		0.486895		0.40525		-0.611118	-2.11314	0.035895	0.579676			-0.77453	-0.670234	-0.242956		0.253063			1.46485		1.7111
213	AA291494*179G9	hypothetical protein FLJ11560 FLJ11560	Hs.301696	1.01568	-0.172857	0.244778	0.371296	-0.057888	0.300016	0.706566	0.0187235	1.02637	0.325352	-0.324965	-0.762744	-0.149061	0.753268	0.247001		0.195632	0.461241	0.0707852		-0.43337	-0.451863			-0.576206	0.522774	0.879581	-0.0441985	-0.0251699	-0.187612	-0.296592	-0.753096	1.76031	-0.510119	-0.571671	0.074948	0.385073	0.0562892	0.0512824		0.330048	1.11425	0.523408	0.140353	-0.163764	-0.105444
214	AA704613*180G1	MYC-associated zinc finger protein (purine-binding transcription factor) MAZ	Hs.7647	0.428376	0.397654	-1.21607	-0.379149	-0.401603	-0.813264	0.284801	0.58975	-1.22812	-1.06388	-1.06555	-1.00178	-1.22042	-0.21617	-0.428112		-1.83862	-1.1791	-0.744661	-0.597667	-0.759143	-0.346095	-0.614065		-1.11787	0.0802582	-0.748542	-0.976574	-0.735148	-0.804828	0.336166	-1.94294	-0.983586	-0.744095	-0.69509	-0.746438	-1.28955	-1.6586	-0.610299	-1.59424	-1.4831	-0.193341	-0.607454	-0.358403	-0.996718	0.678376
215	AA706935*180G5	exostoses (multiple)-like 3 EXTL3	Hs.9018	0.446859	0.044347	0.358964	-0.609673	-0.278619	-0.023066	-0.488371	-0.26593	0.0376841	0.774309	0.351511	-0.201166		-0.0954444	-0.456946		-0.255322	0.300114	0.055686	0.319124	0.566879	-0.683037		-0.374738	-0.533888	-0.125538	-0.0061506	-0.82989	-0.503039	-0.416331	0.688115	-1.86536	0.975641	0.766632	0.834141	0.301161	-1.28735	-0.763769	-0.460044	-0.741488	-1.24651	-0.347254	-0.336124	0.18097	-0.252447	0.087674
216	AA779079*180G9	DnaJ (Hsp40) homolog, subfamily C, member 3	Hs.9683	-0.591478	0.402278	-0.537755	-0.627284	0.151203	0.424398	0.0345308	0.497683	0.0266195	0.356363	-0.316565	-0.536897		0.468491	0.523602		-0.206106	0.0804132	-0.372572		0.152186	0.159967	1.19214	-0.0712857	-0.463473	-0.170747	-0.139325	0.756669	-0.202104	-0.00317871	-0.210712	-0.337816	0.098542	-0.420505	-0.418305	-0.0866483	-0.391278	-0.630592	-0.394355	-0.356711	-0.216003	-0.307479	0.198372	0.809317	0.360482	0.668927
217	AA872402*181G1	eukaryotic translation initiation factor 4B	Hs.93379	-0.812399	-0.558773	-1.51761	-1.19282	-1.07524	-1.09483	-1.10368	-0.610609	-0.107115	-0.461907	-0.622916	-0.131145	0.073467	-0.317946	0.0325465	-0.0982284	0.0217424	0.096865	-1.31226	-0.458334	-0.333085	-0.557816	0.633672	-1.1578	0.189521	-0.763047		-0.625821	-0.891748	-0.129405	-0.71964	-0.569388	-0.69486	-0.947287	-0.645888	-0.610099	-0.368015	-0.937242	-0.919265	-1.2478	-0.455889	-0.894885	-1.31446	-0.321409	-0.351038	-0.827868
218	AA857015*181G5	ephrin-A1 EFNA1	Hs.1624	0.217415	0.635759	0.106098	0.687165	1.41835	0.588053	1.79077	-0.225688	-0.54471	0.416529	0.91661	0.600556	-0.60573	1.83328	1.56477	-0.180573	-0.285607	-0.637862	0.225165	0.113211	0.940672	0.280826	1.05889	1.09116	0.539262	0.226509	0.676818	1.4206	0.634787	-0.229123	0.988806	-0.627864	0.190776	-0.164715	-0.00180673	1.6213	-0.106784	0.961595	1.48047	0.306623	-0.132763	0.996523	2.272	0.525133	-0.0299065	-0.0421542
219	AA251457*181G9	paired basic amino acid cleaving system 4	Hs.170414	-0.723654	0.277426	-0.662065	-0.229874	-0.240732	0.421805	0.931153	0.16601	0.483886	-0.532171	0.296255	-0.0802274	0.379581	0.0110844	-0.535471	1.13172	0.216163	0.479835	-0.225065	-0.114179	0.265243		0.620891	0.197087	0.538093	-0.0922252	0.134353	1.09526	0.708346	-0.274048	-0.106755	0.146428	0.845442	0.0303582	-0.967313	-0.538285	-0.0522085	0.313908	-0.888671	-0.704463	0.0381148	-0.113575	-0.599063	0.397391	-0.276656	0.125374
220	R96914*184G1	thymidine kinase 2, mitochondrial TK2	Hs.274701	0.378708	-0.285281	0.0218887	0.179681	0.290817	0.274229	0.817415	0.367072	0.717824	0.942555	0.806032	1.13346	0.503595		0.48891		0.285041	1.26735	0.800073	1.311	0.525509				-0.191417	-0.206094	0.448143	-0.189088		-1.35341	0.390731		1.0247	0.126856	0.732048	0.902526	0.151989	-0.0671239	0.179994			-0.464457		0.475303
221	R96579*184G5	CGI-30 protein CGI-30	Hs.19978	-0.586562	-0.383183	-0.339861		-0.235055	-0.473362		0.791135	0.270361	0.496627	-0.245675	0.425311	0.138538		0.58257		0.507804	0.138695	-0.138512		0.242615	0.359902			0.423568	0.0581749	0.494317	0.0970771	-0.150179		-0.0822566		0.144303	0.0210874	-0.115756	0.0879432	1.05665	-0.589679	-0.405637		-0.362404	0.00786441	0.811856	0.351796	0.679492	0.225315
222	H54701*184G9	KIAA1712 protein KIAA1712	Hs.29798	-0.142929	0.536885	-0.0260488	-0.413792	-0.427457	-0.0266365		-0.0539225		-0.192784	2.53059	0.45989	0.178351		0.206587	0.578702	-0.121468	0.211519	-0.24105	-0.723959	0.285543	0.308612	0.890048		0.613116		-0.0252748	0.436912	0.600964	-0.123839	-0.461936	-0.236717	1.41248		-0.568754	0.0105758	-0.423394	0.331893	-0.578135			0.263334	0.276649	0.88698	0.231231	1.1356
223	N50834*182G1	mevalonate (diphospho) decarboxylase MVD	Hs.3828	-0.272277	-0.0702838	-0.430465	0.198079	-0.74642	0.314961	0.537629	-0.880689	0.0455371		-0.127943	-0.872253	0.0876294	-0.94916	0.216971		-0.276892	-0.410709	-0.0169402	0.786585	0.370774	0.28459	0.867509		-0.728866	-0.0583332	1.32501	-0.230145	0.219604	-0.336762	0.310726	-0.601511	0.759624	-0.855118	0.102652	-0.818879	0.272471	-0.871836	0.234079		-0.886281	-0.366283	0.520036	0.0184228	-0.0255737	0.0458554
224	AA455652*182G5	arginyl-tRNA synthetase RARS	Hs.180832	-1.23243	-0.380486	0.069356	-0.354603	0.222248	-0.716556	-0.169325	0.228487	-0.136017	-0.398045	-0.101208	0.182444	-0.109684	-0.30773	-0.769202	-0.172648	-0.527877	-0.396013	-0.59826	-0.717297	0.233873	-0.851889	-0.357783	-0.313458	0.162691	0.303161	0.0115541	-0.517873	-0.434706	-0.21072	-0.729572	-0.156477	-0.17175	-0.199502	-0.0467976	-0.64975	-0.151734	-0.763137	-0.459787	-0.872995	-0.477906	1.13893	-0.968267	-0.623677	-0.0758825	-0.168277
225	AA465223*182G9	mannose-6-phosphate receptor (cation dependent) M6PR	Hs.75709	-0.260305	-0.416072	-0.403687	-0.563587	-0.284872	0.366409	-0.30613	1.61859	0.266625	-0.290082	0.25917	0.166732	0.233487	0.153787	0.104373	0.0226242	-0.0447144	-0.0383119	-0.478464	-0.204828	-0.434341	-0.273897	0.461449	0.133419	0.34229	0.0906729	0.238167	0.368029	-0.135551	-0.305298	-0.37768	-0.634815	-0.594372	-0.51373	0.610774	-0.274565		-0.0622524	-0.105927	0.177566	0.550599	0.0952038		-0.097007	-0.094366	-0.332896
226	R11498*183G1	ESTs, Weakly similar to B28096 line-1 protein ORF2 [H.sapiens]	Hs.300070	0.584198	0.0185701	0.576011	-0.129877	0.113552		-0.294796	0.701086	1.3483	0.247358	0.425499	1.04333			-0.203669	0.297784	0.00805592	0.881189	0.476651		1.22549									-0.831924			0.730787	0.568416				0.531772	0.196611		0.57262					1.25699
227	R16837*183G5	R16837		0.876266	0.942396	0.70555		0.792777		-0.00988046	0.473884		0.574512	0.457278	0.81862			0.289182	0.719401	0.0515381	0.845264	0.272295		0.68442			0.634703	0.418858								0.248651	0.450702				0.49757	1.44614
228	R12665*183G9	Homo sapiens, clone IMAGE:5227850, mRNA R12665	Hs.11594	0.764552	0.136598	1.08375	0.690837	0.718298		0.825629			0.502328	1.17744	1.47602			0.785833	-0.0291268	0.181476	0.501516	0.564531		2.24859				1.09737				1.12268				0.383102	0.555775			1.07707	2.34152	1.23996				5.19401
229	AI025015*220G1	neural precursor cell expressed, developmentally down-regulated 5 NEDD5	Hs.155595	-0.536564	-0.549803		-0.425554	-0.535879	-0.521087	-1.42513	-0.0052077	0.358922	-0.0376415	-0.0302851	0.386314	0.44219	-0.0731002	-1.37735		-0.0796178	-0.407805	-0.206928	-0.442965	-1.20584	-0.27481	0.337013	0.293111	-0.481857	-1.02447	-0.863953	-0.335743	-1.06313	0.147063	-0.499075	-0.195116	0.116923	-0.402008	0.0398483	-0.199708	-0.0288388	-0.0820922	-0.293321	0.0750529	-0.154571	-0.895297	-0.849424	0.317141	-0.3607	-0.0323049
230	AI005197*220G5	myosin light chain 2 HUMMLC2B	Hs.50889	0.0901012	-0.331698		0.0686434	0.069623		0.662928										0.148669	0.363916													1.46146
231	AI016039*220G9	plexin B2 PLXNB2	Hs.3989	0.403278	-0.297503		0.893633	0.0012119	0.20977	1.90057	0.0354634	0.715714	1.85784	0.89541	1.17393	1.43126				0.0850472	1.86414	1.76494		1.29572	-0.152329		0.436809	1.23718	0.949803	2.3111		1.10786		0.712285	0.448378	1.14369	1.59766	1.66809	0.900465	1.17827	-0.0279391	0.876012	0.386647	0.406838	0.522569		2.20072		1.35476
232	AA282230*221G1	proteasome (prosome, macropain) 26S subunit, ATPase, 3 PSMC3	Hs.250758		-0.00800923	0.502278	-0.0921668	0.300142	0.961768	-0.138439	0.142505		-0.00838896	-0.588249	-0.847585		2.50512	0.772335	-0.176843	-0.328458	-0.725283	-0.216152		0.74135	0.515427	1.22393		1.04727	1.47271	0.747891	2.04114	1.04215	-0.00817743			0.204331	-0.664281	0.762022	0.00640469			0.722452		0.957546	0.60543	2.65122	0.924917	1.84616	1.2763
233	T62963*221G5	vesicle-associated membrane protein 8 (endobrevin) VAMP8	Hs.172684	0.470213	-0.163113		1.74805	0.838336	1.64142	0.726257	1.19918	-0.204565	0.128736	-0.238826	0.256998		1.05679	0.633341		-0.150768	0.0318928	0.603506		-0.586065			0.31523	0.66057				0.151797		0.285639		0.37696	0.116211	-0.603164		-0.0372139	0.945635	1.75864			1.38223		0.397668	0.942115
234	AA599007*221G9	hypothetical protein FLJ13868 FLJ13868	Hs.9003	0.28618	0.111261		-0.176097	0.256405	-0.167144	1.12087	0.48752	-0.226403	0.421728	-0.464875	-0.177145		0.14097	0.0337989		-0.338596	-0.0216948	0.112481		-0.0720559	0.340224	0.637346		-0.582048	-0.171681	0.59297	0.0146059	-0.114886	-0.00833628	0.409159		-0.131458	-0.44584	-0.00781318	-0.414688	-0.000180014	-0.88141	-0.37562	-0.404728	-0.438918	-0.305959	0.350137	0.543786	-0.153887	0.253797
235	AA706094*222G1	ESTs, Weakly similar to 2109260A B cell growth factor AA706094	Hs.194305							-0.413657	-0.0305232												0.901906	-0.430564																		0.0881973
236	AA035130*222G5	hypothetical protein, similar to (U06944) PRAJA1	Hs.16537	0.589513	0.329943		-0.689687	-0.000489655		-0.215099		-0.687864	-0.15354		-0.599911			-0.0891882		0.202735	-0.241808		0.0555166	-0.179395						0.197965		-0.346159		0.348229		-0.272198	-0.5803		-1.05994		-0.0336652	0.240335		0.317257			-0.684045	-0.334095
237	AA040861*222G9	UDP-N-acteylglucosamine pyrophosphorylase 1 UAP1	Hs.21293	0.0148728	0.0200543	-0.39996	-0.935203	-0.0442221	-0.766625	-1.24731	0.234317	-1.16981	-0.90794	-0.733023	-0.199241	-1.0105	-1.48772	-0.875188		1.54139	-1.50216	-0.839568	-1.44183	-1.77105				-1.2111	-0.90846	-0.597639	-0.60112	-1.14196	-1.14827	-0.93887	-0.766003	-1.04034	-0.893094	-1.79719	-0.352135	-0.555378	-0.739264	-0.835781	-0.857595	-0.656413		0.678294	-1.48921	-0.541495	-0.433121
238	AA708441*223G1	hypothetical protein FLJ20761 FLJ20761	Hs.107872	1.02112	0.478944						1.36898	0.870143	0.223145		1.2968			0.821283		-0.714847			1.08066											1.14527						0.572311	0.67075	0.620867
239	AA706132*223G5	hypothetical protein FLJ20270	Hs.14606	-0.146047	-0.407658	2.28132	0.040001	0.62097			0.0923444		0.772232	0.0381028	2.28667	3.10022	2.53898	2.73051		0.400862	0.549342	0.658359		2.50259	0.328871			0.894826		0.713881	1.86797	0.791436	2.88532	2.36341	-0.26601	1.11023	0.670405					0.101441				2.75463	0.698763
240	AA709322*223G9	ESTs, Highly similar to Human Pancreatic Alpha-Amylase From Pichia Pastoris, Glycosylated Protein [H.sapiens]	Hs.180149	-0.191214			-0.35691	0.0862133	-0.363774		0.50161	0.84989		-0.0308451	0.868938					0.130418	1.39114			1.62884		-0.423642						1.08881										0.25807			5.07299
241	AI005572*288G1	AI005572		2.98277			3.1418				-0.488597	-0.802007		-0.290626	0.958041					0.455789	0.386721		-2.10831	1.57064		-0.57531		1.91536				-0.207991		3.25387					3.92532			-0.605354			0.959402				0.0665749
242	AI005637*288G5	KIAA1043 protein KIAA1043	Hs.11390	1.20737	-0.195514	-0.168265	-0.544771	-0.706417	-0.290934	0.0745145	-0.710279		0.0400632	0.474496	-0.223857	-0.235634		1.06198		0.274639	0.0415044	-0.30235		0.0583728	-0.4328			-0.19912	0.0218388	0.375363	-0.264237	-0.0459835		0.0484127		-0.695365	-0.42142	-0.497204	-1.64681	-1.01152	-0.46532	-0.351645		-0.359367	0.244849	0.227973	-0.096213	-0.437996	0.109194
243	AI005668*288G9	ESTs AI005668	Hs.130673	0.454788	0.12373	0.821666	0.100866	0.429349												0.110243	1.43537			0.852877													0.835462
244	AI022380*289G1	Homo sapiens cDNA FLJ36194 fis, clone TESTI2027615. AI022380	Hs.36962	-0.812261	0.065199	0.43543		0.00990443	0.655345	0.563953	-0.2673	0.139904	-0.124485	-0.953927	-0.705249					-0.414421				-0.516486				0.761116		1.21203		0.0810148								0.026778	1.34784	-0.285634
245	AI023472*289G5	hypothetical protein BC011406 LOC113763	Hs.123177	-0.071962	0.772411	0.425796	0.261209	-0.0365087		0.855298	0.162696		0.31942	-1.1007	-0.176256		0.723101			-0.148121	-0.014143	-0.0616217		-0.453957	0.339308			0.434001		-0.191874	0.423228	0.230378		0.126694		-0.308557	-0.0241091				0.269852	0.158096	0.923056	-0.0982731	-0.23336		0.907206	0.554947	-0.304984
246	AI022437*289G9	ESTs, Moderately similar to neuronal thread protein AI022437	Hs.269795	0.199773		0.660223	0.0156762	-0.116383		-1.6279		1.51211	-0.828243	-0.745702						0.140153	0.80029															-0.385964	0.368822								0.0480651
247	R45026*290G1	tumor necrosis factor receptor superfamily, member 7 TNFRSF7	Hs.180841	0.550652			1.20591	1.16595					0.635098	0.633137	0.874516					0.162156																					0.729812	2.19013	0.985063
248	T54621*290G5	T54621				0.197928		0.334744		-0.126686			0.198614	0.0499988						-0.0731575				1.52612	2.07412																	-0.192673
249	R66383*290G9	ClpX caseinolytic protease X homolog (E. coli) CLPX	Hs.113823	-1.21585	-0.60941	-0.711533	-0.263568	-0.243485		-0.328204	-0.717086	0.0835008	-0.0973014	-0.0272267	0.141234	-0.0902466				-0.121413	-0.266934			0.0551927	-0.388111			0.505734		0.508438	0.126987	0.309742		-0.314554		-0.333458	0.352814	-1.8432	-1.12087	-0.303932	-0.222914	-0.0944254			0.0870248		-0.0740573
250	AA453995*291G1	ATP synthase, H+ transporting, mitochondrial F0 complex, subunit f, isoform 2 ATP5J2	Hs.155751	-2.0865	-0.350342	-0.059265	0.0940338	-0.324978	1.03799	0.226001	-0.351484	-0.369028	-0.144813	0.164909	-0.729769	-0.171471	0.217782	-0.149058		-0.722272	-0.728155	-0.283427	-0.585241		-0.125463	0.130409	-0.453963	-0.371175	-0.308559	-0.136631	-0.261782	-0.279521	0.186743	0.30052	-0.326744	0.109049	-0.212668	0.0417163	0.223188	0.279951	-0.0598109	-0.419631	-0.339265		-0.530391	-0.396385	-0.0461146	0.0219573	0.176226
251	AA416757*291G5	programmed cell death 5 PDCD5	Hs.166468	-0.604532	1.60886	-0.185707	-0.637439	0.301911	-0.458955	-0.791095	0.43323	-0.788406	-0.628386	-0.222329	-0.573342		-0.440807	-0.409514		-0.399219	-0.701792	-0.00644123		-0.140936	-0.501687	0.0559435		0.247949	-0.56532	-0.0430355	0.59972	-0.23647		0.324771	-0.738446	-0.530977	0.420961	-0.50448	0.0107263	-0.352553	-0.622058	-0.527299	-0.59434	-1.00136	-0.101632	-0.0423044	-0.263715	0.347668	0.329693
252	AA456142*291G9	hypothetical protein FLJ22028 FLJ22028	Hs.192570	-0.695663	-0.570543	-0.212619	-0.489549	-0.502554	-0.258393	-1.43228	2.61116	-0.565493	-0.953922	-1.35495	0.0372781	-0.917027	-2.01214	-1.68322		-0.0149323	-0.471566	-0.695162		-0.815631	-1.78856	-0.418905		0.643068	-0.583622	-0.493314	0.240843	-0.648898		-1.86303		-0.137399	-0.270345	-1.92346	-1.07554	-0.757303	0.101677	-0.851461	-0.622199	0.299894	-0.146618	-0.413169	-0.213727	-0.15819	0.394688
253	AA620511*292G1	heat shock 70kDa protein 8 HSPA8	Hs.180414	-0.356319	0.347006	0.31423	-0.300805	0.557886	-0.61615	0.312633	-0.078952	0.508587	-0.296772	0.368838	-0.00366929	0.548544	0.267937	-0.606981	-0.0658769	0.268841	0.167236	0.06008	-0.270295	0.584884	-0.905558	0.443787	0.242154	0.0912978	0.955576	0.13864	-0.415136	-0.0771909	0.960728	0.410171	0.232456	-0.588414	0.488029	0.700216	-0.196852	0.256677	-0.0526976	-0.22762	-0.498673		0.676678	0.0988357	-1.55617	0.635591	0.0920509
254	AA071537*292G5	AA071537		-0.837177	-0.361973	-0.15795	-0.114055	0.59875	-0.510271	-0.213743	1.21937	-0.348011	0.087769	0.14218	-0.181562	-0.117973	0.125412	-0.779448	-0.186275	-0.251164	-0.357562	-0.249182	-0.720437	-0.847166	-0.0900924	-0.391534	1.1069	0.229519		-0.6667	-0.400423	-0.700485	0.231523	-0.528783	0.30849	-0.285651		0.308579	-0.271718	-0.182538	-0.00880645	-0.794952	-0.575828	-0.310305	-0.333293	-0.462923	-0.129403	0.257481	-0.62939
255	AA171948*292G9	splicing factor (CC1.3)	Hs.145696						-0.594335	-0.55974	-0.182711	-0.335222	-0.737608	-0.316809	-0.382802	-0.214157	-0.215778	-0.548393	0.0195864	-0.289009			-1.43476	-0.104444	-0.0178723	-0.4391	-0.285158	0.0834102		-0.849051	0.205554	-0.618601	-0.353622	-0.764652	-0.542365			-0.835055	-0.628554	-0.658324	-0.91237	-0.711752	-0.963099		-0.262541	-0.943681	-1.19716	-0.38721	-0.605677
256	AA279025*293G1	lipin 2 LPIN2	Hs.166318	-0.11457	0.368366	-1.1146	-1.22421	-0.637714	-1.30213	0.853563	-0.213054	-1.49193	0.0556336	-0.195033	-0.658233	-0.70164	-0.908503	1.02919		-0.418297	-1.11285	-0.856022	-1.21843	-1.08431	-1.20258	-0.383465	-0.731207	-1.91036	-0.834909	-0.523374	-0.052358	0.206231	-1.81162	-0.451921		-1.54958	-0.625316	-1.12707	-1.42856	-1.71077	-1.05979	0.0727622	-0.410652	0.479087	-0.868839	-0.379241	-1.58831	-0.842501	-2.12614
257	AA521239*293G5	polymerase (RNA) mitochondrial (DNA directed) POLRMT	Hs.153880	0.0642037	0.0221354	-0.342663	0.153201	0.0937806	-0.760901	0.469631	0.510525	-0.00817363	0.327849	0.169757	-0.17002	0.562486	0.376722	0.608718	0.130025	-0.432402	0.502997	0.329624	0.158397	0.582637	-0.0296085	-0.114142		0.240882	0.276551	0.391673	-1.21806	0.199356	0.226124	0.473202	0.240939	-0.0169184	0.509032	-0.0733228	-0.555501	0.440655	-0.406621	-0.345171		-0.637681	0.636587	0.359018	0.630272	-0.388157	0.890493
258	AA281731*293G9	natural killer-tumor recognition sequence NKTR	Hs.241493	-0.523694	-0.997228	-0.750491	-1.06507	-0.434297	-1.27654	-0.742543	0.174752	0.456618	-0.197168	0.463314	0.754592	-0.412378	-0.627409	-1.10572		-0.123327	0.410603	-0.412147	-0.50474	0.933436	-0.264258	0.210509		0.281603	-1.19903	-0.281707	0.557934	-0.46021	-0.485003	-0.861876	-0.163645	0.0142826	0.255407	-0.635693	-1.61002	-0.610443	0.2459	-1.00476	-0.887824	0.115464	-0.918768	-0.963098	0.527024	-0.162589	0.504339
259	AA971746*294G1	cyclin C CCNC	Hs.118442	-0.425725	-0.665298	-0.0499519	-0.29999	-0.458733	-0.472921		-0.121658	0.328592	-0.617994	-0.299276	0.00690908		-0.239063	-0.559251	0.34703		-0.366143	-0.379896	-0.413757	-0.262841	-0.43979	0.531015	0.0405882	0.517231	0.41861	-0.222709	-0.106564	-1.01352	0.135993	-0.0577568	0.233794	-0.214234	-0.186981	0.418623	-0.481657	0.0470427	-0.234561	-0.461178	-0.774282	-0.319722	-0.50086	0.146045	0.0318626	-0.184875	-0.42686
260	AA974773*294G5	acetyl-Coenzyme A acyltransferase 1 (peroxisomal 3-oxoacyl-Coenzyme A thiolase)	Hs.166160	0.0041076	-0.698741	-0.315539	0.0791522	0.359654	0.0672893	0.843612	-0.190309	1.44088	1.22482	0.364242	0.043321		1.00633	0.676287	0.546375	1.39336	0.923226	0.331581	0.754055	1.14855	1.10842	-0.0536338	0.729669	0.675754	2.38997	0.961186	1.45849	0.173362	0.910135	1.23443		0.897529	0.633152	0.741263	-0.0174277		-0.0363674	0.0914354		-0.26459	-0.319802	1.89784	0.197528	0.681064	1.11647
261	AA953249*294G9	H factor 1 (complement) HF1	Hs.250651	0.377707	1.22865	0.29405	0.323166	0.699196	0.442804	0.220807	1.65116	0.699604	0.673295	1.1522	0.99274	1.35642	0.996328	0.853732	1.29901	0.411208	0.724171	0.368483	0.45347	0.199604	0.183824	0.825059	1.16758	1.16151	2.12549	0.729241	0.760939	0.354835	1.62065	1.89287	0.748494	1.67629	1.17021	1.96259	1.59247	0.524915	0.942194	0.424981		1.0282	1.04897		0.621686	1.26194	1.07599
262	AA962013*295G1	TIA1 cytotoxic granule-associated RNA-binding protein	Hs.239489			-0.0892689	-0.0508027		0.186591	-0.255355	0.215732	0.369627	0.801996	0.714365	0.304044	0.372461	0.542095	-0.422631	0.0155285	0.149761	0.638995		0.347627	0.525956	0.191278		0.241587	0.972649		0.523893		-0.182369	0.91127	0.460052			2.15258			0.859131	0.689598	-0.375024			0.256166		0.220309	0.62187	0.269784
263	AA029069*295G5	fatty acid desaturase 1 FADS1	Hs.132898	-0.296202	-0.362302	-0.273845	0.051312	0.28319	-0.588594	-0.276161	-0.116475	1.06161	0.338682	-0.385435	-0.249721					0.394037	0.403587		-0.386692	0.4135								0.0374985		0.534944			0.403003			0.139813	-0.252796	0.0500814						0.0363329	0.022216
264	AA774104*295G9	A kinase (PRKA) anchor protein (yotiao) 9 AKAP9	Hs.58103	0.162027	0.448849	0.28563	-0.000484353	-0.175553	0.966471	0.538696	0.0825615	0.0810127	0.337358	0.140275	0.326685	1.30016		0.847424		0.189533	0.00877958	0.181748	1.08266	0.562433	0.76337		0.448277	0.321015	0.214214	0.25406		-0.442237	0.885519	1.05218	0.116214	0.579078	0.295542	-0.515767	0.758927	0.930411	0.349259	0.578506	-0.106314	0.38027	0.329445	0.61092	1.06875	0.560701	0.17757
265	AI198629*296G1	ovo-like 1(Drosophila) OVOL1	Hs.97905			1.78198	0.346265	0.734392		1.35766	-0.615448	2.80512	2.29155	2.28986	1.11192					0.847446	3.0661	1.55484	1.85655	2.62699	3.00417					3.52862		1.74689		2.42464		2.70895	1.96851			3.28967	0.056589				2.0919				3.29378
266	AI200114*296G5	granzyme B GZMB	Hs.1051	0.662249	0.396223		1.4646	3.02884		-0.0670073										0.51817	0.0148526																					4.08463
267	AI222468*296G9	protein-kinase, interferon-inducible inhibitor(P58 repressor) PRKRIR	Hs.177574	-0.054954	-0.299616	-1.12701	-1.51451	-0.472716	-0.184359	-2.07517	-0.376692	-1.25148	-1.0443	-0.85964	-0.0546502					-0.673319	-1.09057	-0.917959			-3.9797					-1.2046	-0.606237	-0.882084		-1.5674		-1.83984	0.020053	-2.28772		-1.0364	-1.14398	-1.5274					-0.757981	-0.503969	-0.742665
268	AI308855*297G1	arginyltransferase 1 ATE1	Hs.301497	0.430438	0.517548	0.0912244	0.31117	-0.453592	0.467628	-0.466608	-0.217346		-0.00414115	-0.168519	0.56117	0.584179	0.299016	1.05462	0.715414	0.912295	0.584282	-0.0872221	0.295836	0.244129	0.416047	0.691871		0.256955		0.350546	0.423844	0.338594	1.09625	-0.414418	0.215069	0.49998	3.18897	-1.59655	0.266845	0.716068	-0.433213	0.0512403		0.959559	-0.0508982	0.794402	0.95019	0.11623	-0.331631
269	AI311932*297G5	glia maturation factor, gamma GMFG	Hs.5210	-0.458492	-1.27376	-0.516982	0.144112	-0.29791	-0.752307	-1.40865	-1.47655		0.675702	-2.59742	-1.15881	1.5729		0.405184		0.114379	1.67803			1.84392		0.0985616				-0.332003		-0.932334		0.610855			-1.16807	1.70134	-1.75082	-3.20573	-1.51292	0.557365		1.56584			-1.7853		-1.81747
270	AI347629*297G9	AI347629		0.956924	0.565002					-1.12233	-0.145022			-0.751346	-0.645312					0.152904				-1.20045										-0.270246			0.557816				-0.315506	-0.511945					-0.158335
271	AI359169*298G1	neuronal Shc SHC3	Hs.151123	-0.562031	0.590924	1.42228	0.824145	1.62809	-0.171509	0.429171	0.646348	1.35663	0.789218	1.3723	0.0807152	1.18429	1.16379	0.173527		0.372524	0.394772	0.764692	0.831291	1.13358	1.01742			0.87343	1.60133	1.33694	-0.0730472	0.605868	1.46085	1.21532	0.32476	0.517581	1.04446	0.79207	1.09117		1.56378	0.748435			2.19134	0.663415	0.521228	0.419572	0.96509
272	AI359699*298G5	triple functional domain (PTPRF interacting) TRIO	Hs.171957	0.151454	-0.372371	0.222411	-0.542339	0.692301	-0.620911	-0.150949		-1.13778	0.280519					0.196353		0.025801	-0.0978587	0.369206		-0.285143	0.034524			-0.388283		-0.462802	0.682874	-0.670818	0.471347			-0.236915	0.0210874					-0.420767			-1.56056	-0.841188	-0.323414	0.147167	-0.390649
273	AI362029*298G9	nuclear receptor subfamily 2, group F, member 1 NR2F1	Hs.144630	0.613807	-0.923548	-0.998783	-0.665218	-1.03125			-1.38808		-1.18294	0.0847198		-0.637016		-0.400499		0.223429	-1.48841	-0.752823		-1.02801	-0.743994			-0.6822	-1.94547	-0.507401	-1.14868	-1.0093	0.390211	-0.398573		-1.05966	-0.789706	-1.87575	-4.46989		-1.13322	-1.57536		0.00468716	-1.43828		0.0241918	-1.25491	-0.947173
274	AI262140*299G1	dehydrogenase/reductase (SDR family) member 4 DHRS4	Hs.153937	-1.54775	-2.19313		-2.23803	-2.54266	-2.55595		-3.3316		-2.24568	-2.99437					-2.20492	-0.0672709	-2.54392	-2.6627	-1.77879	-2.26482						-2.23415						-2.24043	-2.31119			-2.58752		-2.74809			-3.64039	-1.8596	-2.62883
275	AI253052*299G5	protein tyrosine phosphatase, non-receptor type 9 PTPN9	Hs.147663	0.0377783	0.223862		0.180971	0.385093	-0.379855	0.530428	0.5101	-0.0656704	0.0013368		0.104683						0.832839					-0.596325								0.801969		-0.0330498	0.295879			0.260263		0.43592			0.467881
276	AI364951*299G9	AI364951		-0.57342	-0.725888		1.09408	-0.719348		0.741338	-0.927081	0.995244	-0.0296094	0.94382	-0.246122		0.640779			0.164762	-0.00542915	0.0691778	-0.3595	0.317049	-0.480424			1.7347		0.306868	1.9021	0.644178		-0.738117		-0.309529	0.872878	-1.26582	-2.83836	1.53763	-0.0299081	-0.691421						-0.507526	1.06807
277	AA865039*324G1	Data not found AA865039	Hs.124346					-0.0633072			-1.05048			-0.285165						0.626978			-1.21398																			0.316016
278	AA897338*324G5	Homo sapiens, clone IMAGE:5271578, mRNA AA897338	Hs.148190	0.0305987	0.0118801	0.433776					-0.442211		0.305695	1.02335	0.127035					0.210232	0.137951	-0.34411			0.714026			0.710213				0.384379				-0.966919	-0.24829			0.194007	-0.0143847	-0.0130784			0.288644		0.0122682
279	AA897405*324G9	ESTs AA897405	Hs.148200	0.849474		0.769825	0.27871	0.584329												0.982538	0.337221											1.23826				0.173381	0.277402
280	AA070434*325G1	KIAA0683 gene product KIAA0683	Hs.226275	-0.839167			-0.301205	-0.450079	-1.04296	-0.150216	-0.4948	-1.38504	-1.29571	-0.911571	-1.28574	-1.40152					-1.28526		-0.683157	-1.30967	-1.4284			-1.16949		-0.470476		-1.01961		-0.693721		-0.705554	-0.667997		-0.531533	-1.34925	-0.394306	-0.256021	-0.531891				-0.907052		-0.814445
281	AA873792*325G5	small inducible cytokine A5 (RANTES)	Hs.241392	0.825802	-0.0437129	-0.166752	-0.079064	0.413163		-0.0868126	0.0668593	0.193768	0.289655	0.658571	0.500723	-0.0074057	0.84505	0.721664		-0.0418788	-0.187911	0.371366	0.0846305	0.326072	-0.685728	0.267975	-0.116995	0.2847	0.419037	0.857798	-0.378502	0.716166	0.168441	-0.047436	-0.304297	-0.0423551	0.279642	0.0382114	0.1646	0.423389	-0.0270199	0.7426	0.670047	0.766657	0.300973	-0.354077	0.495337	-0.450026	1.25818
282	AA292063*325G9	glutathione S-transferase pi GSTP1	Hs.226795	0.630747	0.175152	1.46382	1.75114	1.40429	1.52183	-1.75904	-0.219339	0.975708	0.77652	1.31071	0.950851	1.75095	1.45187	0.508592	1.08414	0.0526157	1.41698	1.16453	1.39381	1.09575	0.948567	1.08325	0.909514	0.377267	0.801383	1.29046	0.277249	1.13626	1.74559	1.19114	0.503515	1.54676	0.779159	0.985867	2.24488	0.727809	-0.856488	0.481	-0.366772	0.289254	0.644926	0.215861	1.66372	1.69978	0.916985
283	AA936138*326G1	coat protein gamma-cop	Hs.102950	0.255112	0.206574	1.02626	0.15293	0.00378116	1.17893	0.203668	-0.211599	0.275708	0.247786	0.891986	0.373178					0.367838	0.290106	-0.0900082		0.284927	0.68018					0.704088		0.367683		0.097597			0.0714138			0.827819	0.313001	-0.395796	-0.187551		0.316261				0.516643
284	AA928611*326G5	CD3-epsilon-associated protein; antisense to ERCC-1 ASE-1	Hs.211956	-0.624452					0.344895	-0.263394	1.0645		0.309557	0.248378	0.506683			-0.00208684		0.135166	-0.374114						0.222201			1.42989		0.401162		0.0334328		0.22402					0.574926	-0.369199	-0.284968
285	AA947176*326G9	nuclear receptor coactivator 2 NCOA2	Hs.29131	0.142725	0.663716	0.58611	0.582329	0.309092	1.19377	1.0981	0.0973663	1.10467	0.729695	0.922961	0.785373	1.0192	1.37006	1.03005		-0.0561764	0.617691				1.77911			0.683978		1.25948	2.51316	0.801397	1.37145	0.741376	1.50022	0.0829569	0.509102	0.472653		0.507126	0.892644	0.360508			0.610842		0.775081	1.09155	0.38318
286	AI218581*327G1	ATPase, aminophospholipid transporter, Class I, type 8A, member 1 ATP8A1	Hs.144931	0.0971142	-0.0519727	0.00569287	0.252858		0.604208	0.0471936	-0.237454	0.123932		0.738795	0.194161			0.376537		0.389961	0.136826	-0.00720085			-0.232627			0.890943			1.07962	-0.0459421				-0.761685	0.0160846			-0.117451	0.119392	-0.168911	-0.0712826		0.139311				0.437571
287	AI240562*327G5	cytokine receptor-like molecule 9	Hs.7120	-0.878562	0.698016	1.39205	0.191097	0.0366529	-0.00103889	0.425029	-0.798479	-0.206988	-0.0389742	-0.573033	0.749986	0.492507	0.417894	0.611753	0.465266	0.0753346	-0.863295	-0.657757	-0.0639804	-1.67753	-0.191667	-0.173595	-0.441013	-1.44324	-0.111222	-1.01744	-0.308143	-0.693836	-0.232955	-0.0963904	-0.734855	-1.73354	-1.56461	1.12284	0.0896472	-0.180827	0.4517	1.71309	0.415348	0.131262	-0.470214	-0.331537	-0.190892	0.971417	-0.569327
288	AI241419*327G9	ESTs AI241419	Hs.252180	0.204512	0.213606	0.4449	-0.162592	-0.240147	-0.405178	-0.815301	-0.292218	0.559119	-0.590216	-0.814883	0.376541	0.170015				0.197687	0.408555	-0.0899612		-0.372607		-0.161059		0.3289	0.276521	-1.01849	-0.174802	-1.49738	0.336261	-1.22678	-0.642007	0.220114	0.380151				-0.0875043	-0.248963		-0.264076	-0.126178		-0.686162
289	AI304577*328G1	interleukin 12A IL12A	Hs.673						-0.683321		-0.25434	0.678091	0.0794666							0.238435	0.16141																-0.182896					0.636739
290	AI311391*328G5	prostate androgen-regulated transcript 1 PART1	Hs.96744	-0.526498	-0.351146			-0.438158			0.211168	-1.34878	-0.0359337	-0.761144	-1.12609						-1.24397													0.383325		-1.27556	-0.988979					-1.08436					-0.252188
291	AI344565*328G9	DKFZP586K0524 protein	Hs.27239							0.135206
292	AA928454*329G1	keratin 16 (focal non-epidermolytic palmoplantar keratoderma) KRT16	Hs.115947	1.1833	-0.760914	5.6071	5.0247	2.89561	3.51114	0.600521	0.926807	2.57385	1.67404	1.70365	2.00841	3.10079	2.65428	2.58792	2.26975	1.61097	1.89852	1.28924	3.13323	1.16062	1.70859	1.38517	4.30723	2.863	0.804386	2.96909	1.04989	2.79288	3.46264	1.84482	1.33556	2.8012	1.6752	1.92216	5.07572	2.26325	2.59381	0.38688	0.177392	0.48542	4.94464	3.37505	2.4149	2.11969	2.91286
293	T95879*329G5	PERB11 family member in MHC class I region HCGIX	Hs.511741	-0.162453	0.0481456	0.11697	0.325779	-0.175588	-0.120987	0.399246	0.415335		0.592565	0.452956	0.34467	0.964385		-0.277525		0.776154	0.713866	0.014808			0.613245			0.417338		0.696591		0.265261	-0.284958	-0.115087		0.297858	0.1741				0.136431	0.179453			0.379382		1.70446		0.252022
294	H92070*329G9	KIAA0508 protein KIAA0508	Hs.270010	0.341766	0.0364514	-0.00820049	0.226131	-0.0296406	-0.242753	-0.227079	0.142949	0.0983289	0.251053	0.0440777	0.144615			-0.497704		0.3181	0.614287	0.387975	0.276317	0.330988	0.0354008	0.313984		0.174396	0.0610472	0.0606164	0.325652	-0.0686729	0.230383	0.11041		0.324069	0.0802331		0.153897		-0.243387	-0.324783			-0.877323		0.894063	-1.16772	-0.348288
295	AI203028*330G1	H.sapiens MADM gene (exon 1)	Hs.307205	0.0561303	-0.581163	0.375683	1.56706	2.00078	1.2871	0.356965	1.12758	-1.25042	0.0948404	-0.162036	0.956674			-0.442648	-0.229293	0.316567	-0.98114	-0.0602682	0.339207	-0.350458	0.244529	-0.149807		-0.00205813	1.2547	0.125815	-0.423483	-0.347341	-0.0490596	0.059069		-0.159822	-0.366686		1.60423	-0.140708	1.02177	2.20505	1.4628	2.84693	0.995776	1.64458	0.343184	0.112525
296	AI341065*330G5	RCE1, prenyl protein protease (yeast homolog B)	Hs.288626	0.0471357	0.293771		0.178742	0.663857		0.453234	1.22589	-0.00042496	0.106581	-0.330209	-0.482759			-0.279316	-0.357418	0.213822	0.0643641	0.199006	0.376861	0.443089	0.200056			0.199731		0.875297		0.361211					0.283764					0.460371			0.372321		-0.105819	1.42342	-0.156579
297	AI493478*330G9	collagen, type IX, alpha 2 COL9A2	Hs.37165	1.66755	2.82894		-0.679113	-0.647321	0.0278499			1.17246		0.229973	-0.546323					0.424718	1.32229			-0.556627				0.445038	1.89686	0.52393						0.487067				0.480204	1.62247	0.94771			0.0709772				1.67334
298	AI473373*331G1	glioma-associated oncogene homolog (zinc finger protein) GLI	Hs.2693	0.755904	0.193714	0.504472		-0.0498724	0.939731	0.906564	0.722567	0.294749	0.861895	0.541458	0.384936					0.0874549	0.121467	0.160769	1.23912	0.620236	0.844595	-0.0934167		0.433474		0.966744	2.77824	0.312491	1.00422	0.789198	0.676922	0.456922	0.264976				0.356942	0.550767							0.387635
299	AI434448*331G5	galactosamine (N-acetyl)-6-sulfate sulfatase (Morquio syndrome, mucopolysaccharidosis type IVA)	Hs.159479	1.28933	0.2054	0.65771	0.600054	0.761232	1.27515	0.742753	0.0413067	0.112581	0.302451	0.718359	0.409498	0.662315				0.159488	0.194498	0.186015	0.599344	0.162186	0.703451	0.237536	0.434886	-0.0979736	0.371426	0.455655	0.168152	-0.0235514	0.27671	-0.0542054		-0.669146	0.0774971	0.512249		-0.191829	0.119088	0.170078	0.246575	1.08613	0.362128		0.181321	0.21814	0.404251
300	AI470777*331G9	PDZ domain containing guanine nucleotide exchange factor(GEF)1 PDZ-GEF1	Hs.154545	0.0725979	-0.052728	-0.480374	-0.269892	-0.265392	-0.161695	0.340298	-0.618222	0.714107		-0.438057	-0.273368	-0.592365		0.289639		0.031147	0.313218	-0.2226		-0.303396	0.114999			-0.150693		0.102571	-0.254827	-0.234432	0.0784179	-0.61818		-0.187537	0.0120651	0.790172	-0.489109	-0.904908	-0.970583	-0.443303		-0.167105	-0.659382		-0.652389	-0.642037	-0.83679
301	AI681787*332G1	apyrase, lysosomal	Hs.201377	-0.474781	-0.583254	-0.664094	-0.930413	-0.759764	-0.464962	-0.551789	-1.06591	0.484983	-0.188356	0.0632632	-0.164708	0.194947	0.23375	-0.345934	0.423635	0.150951	0.397927	-0.404988	0.231332	-0.208907	-0.866272	0.339652	-0.0970192	0.140585	0.0020575	-0.731885	-0.446056	-0.943285	-0.275681	-0.87803		0.441023	0.678086	-0.128302		-1.04995	-0.709145	-0.694064	-0.287737	0.319642	-0.849487	-0.128521	-0.378748	-0.466567	-0.379347
302	AI630817*332G5	cadherin-like 22 CDH22	Hs.264157	0.392301	0.227816	0.947151	0.0659376	-0.14528	0.865791	-0.128377	-0.416561	0.199404	-0.0303969	0.817867	0.208382	0.27198	0.0424973	0.451477		0.428554	0.00474662	-0.50182		0.0654291		0.0568752		0.256325	0.420905	0.253235	0.145184	0.0213902	0.640507	-0.30774		-1.01594	-0.184384				-0.105075	-0.232047	-0.171785		0.00483603	0.787826	-0.0406856	0.120628	0.403872
303	AI631014*332G9	potassium voltage-gated channel, shaker-related subfamily, member 4 KCNA4	Hs.1854	0.552762	1.15434		0.251023			0.782445				-0.522179				1.06348		0.00879645	0.0459334	0.0208053				-0.769176		2.15212			2.2064	0.923564	0.917847				0.378654								0.671003	4.21961	3.78883	1.72613
304	AI669875*333G1	Autosomal Highly Conserved Protein	Hs.95260	0.967763	-0.756336	-0.659788	-0.496806	-1.37574	-0.676569	-0.543997	-1.01357	-0.314041	-0.718901	-0.656344	-0.789085	-1.08311		-0.813689	0.245848	0.0402769	-0.539026	-0.790084	-1.8054	-0.538655	-0.50272			-0.0832234			-0.425204	-0.264362		-1.10381		-0.486547	-0.160534			-0.59555	-0.634847	-1.70057			-0.706079		-0.483029	-1.20306	-0.665815
305	AI668897*333G5	protein tyrosine phosphatase, non-receptor type 18 (brain-derived) PTPN18	Hs.278597	0.704402	2.20546		0.119198	0.406813	-1.10634	0.766796			-0.0877894	-0.846973	-0.0444661					0.058548	1.09185			-1.4466										-0.933856			0.299775												-0.0045245
306	AI675394*333G9	chloride channel, calcium activated, family member 2 CLCA2	Hs.241551	0.48945	0.293046	4.20931	1.98176	0.316286	1.48331	-0.429486			0.172273	1.11286	1.94866					0.547654	0.180726	1.30717	1.94741		1.25918		3.00807			1.21425		0.491673		3.1878		1.84564	0.257778	4.68678	5.92996	0.96455	0.00507734	-0.44837		3.8231	1.22021
307	AI167675*334G1	glial cells missing homolog 2 (Drosophila) GCM2	Hs.227098				0.52547	0.568084	2.52795	0.588466			0.676219		0.871728			0.919761		0.146625				0.290132				1.59674		1.72129		1.37896	1.19343	0.146258														2.45553	1.2618
308	AI214706*334G5	phosphatidylinositol glycan, class N PIGN	Hs.108787	-0.0749823	0.483135		1.12216	0.497804	0.98559	0.631593		1.33796	1.16252		0.344745	1.22162		0.78747		0.195632	1.0828			-0.460467				1.35093		1.01129	0.935406	-0.00884479		0.919547		0.633994	0.387524		1.19419			0.254497			0.145562		1.70646		0.782772
309	AI201654*334G9	T-box, brain, 1 TBR1	Hs.210862	-0.0946797	-0.175804		0.787495	0.426978		0.0461128			0.100393	-0.350595	1.07778					0.298688	0.0845263	0.616144										-0.447384	-0.239724				0.212156
310	H11430*335G1	ESTs H11430	Hs.522029	-0.314132	1.0034		-0.0071416	0.374806	1.19103	0.353301	0.23764	0.521551	0.159202	0.196591	-0.636683	1.23377	0.730795	0.560384		0.246094	0.79076	-0.168735	0.080248	0.056521	0.605582			0.27841		0.57926	0.929526	0.181736	1.18052			-0.268461	0.0981447	-1.0381	0.471523	0.714835	0.785422	0.024186		0.463043	0.0716578		0.125333	0.796694	-0.199838
311	AA486794*335G5	AA486794		-0.3757			0.0784332	-0.970852	-0.364131	-0.203706	0.727768		0.55449	0.313033	0.0803782					0.204302	-0.0715281		0.252034	-0.335664				0.114596				0.101944				-0.392193				0.681734	-0.22631	-0.392669					0.0553127
312	AA192725*335G9	cyclin-dependent kinase inhibitor 1B (p27, Kip1) CDKN1B	Hs.238990	0.367535	1.14847		0.240747	0.00890766		0.666858	1.23105	0.442633	-0.0163164	0.17261	0.0871878					0.134859	0.328892			0.247116	0.612895					0.401775		0.573401		0.557534		0.529779	0.062953			0.606238	-0.295817	0.49938			0.256206		-0.139811	-0.7781	0.430951
313	AA151065*JK200D1b	mitogen-activated protein kinase kinase kinase 5 MAP3K5	Hs.186486	0.806839		0.37348	1.12942	1.40339	0.344865	1.24711	1.12054	2.99403	1.7596	1.66977	3.23136	1.55572	2.1216	1.32716	1.98439	1.35433	2.80529	1.1345	1.99671	1.72811	1.73457	2.8888	1.61684	1.45901	0.588237	0.704192	2.1362	1.10699	1.65654	1.44749	0.193274	1.46154	0.866353	3.30352	0.75312	1.02407	0.788181	1.06709		1.00585	1.63503	1.04254	-0.0519972	1.09848	1.12018
314	H08749*JK200D9b	mitogen-activated protein kinase kinase 3 MAP2K3	Hs.514012	-0.240507		0.181096	-0.442965	-0.14466	-0.797029	0.0180116	-0.453524	0.0470507	0.0354008	-0.438784	-0.657376	0.191421	-1.40663	0.23261	0.0434903	-0.158356	0.207845	-0.313817	0.576175	0.261506	-0.427139	-0.0141855	0.872143	-0.350689	-0.0137356	0.877034	-1.49437	-0.115289	0.123282	0.368492	0.286149	0.479891	0.350782	-1.50516	-0.125793	0.353375	-0.721973		-0.228378	-0.348898	-0.349054	-0.00787187	0.080108	0.156479	-0.194878
315	AA608568*JK200D17b	cyclin A2 CCNA2	Hs.85137	-1.41329	-0.100569	-0.792565	-1.24243	-0.995463	-0.688866	-1.17995	-0.795246	-1.44901	-2.19557	-1.21105	-1.44239	-1.42985	-0.634086	-1.8678	-1.89107	-1.0555	-3.53915	-0.984454	-2.36309	-1.49829	-0.546878	-1.04638		-0.492282	-0.0318971	-1.57835	-0.589499	-0.927095	-0.998149	-0.884241	-1.20408	-1.11971	-0.78489	-1.34772	-0.683818	-1.15577	-1.06863	-0.438082	-1.6148	-1.1487	-0.28595	-0.300695	-0.776243	-0.00978844	0.233343
316	R14663*JK200H1b	diphtheria toxin receptor (heparin-binding epidermal growth factor-like growth factor) DTR	Hs.799	-0.677385	-1.38864	0.138838	-1.01441	-0.172557	-0.758333	0.408825	0.266513	0.328669	0.318861	0.342349	-0.137505	0.0677152	0.295186	-0.112507	0.15233	-0.0369632	0.629721	0.253927	0.462299	0.622556	0.406321	0.814532	0.126523	-0.0940241	-0.286085		0.33151	0.61723	-0.297551	0.181398	-0.498876	0.640836	0.698858	0.787615	-0.219893	-0.396586	-0.983442	0.617088	0.217764	-0.31458	-1.0556	-0.391351	0.422152	0.0239633	0.135075
317	T58932*JK200H9b	FOS-like antigen 2 FOSL2	Hs.220971		-1.46517	0.778937	1.63071	0.890159	0.358885	1.07108	1.39018	1.21524	1.49389	1.08857	0.816341	1.23341	1.78572	2.14575	1.16203	0.503675	1.01574	0.942053	1.92797	1.49785	1.46079	1.66328	1.02874	1.34228	0.449075		0.372565	0.528061	1.39243	0.705988	0.925304	1.05898	1.04056	1.40463	1.4837	0.519502	1.53266	0.722747	1.60282	0.375792	0.661466		2.55181	0.127015	1.87685
318	B-Myb*JK200H17b	B-Myb	Hs.531941	-0.744642	-0.16223	-0.732817	-1.16611	-0.770899	-0.96142	-0.34804	-0.0879251	-4.79625	-1.95445	-1.16871	-1.9818	-3.76054	-0.575779	-2.25234	-2.45493	-0.53346	-3.76814	-0.513725	-3.66537	-2.25648	-0.126626		-1.00137	-1.23973	0.433919	-2.09609	0.255177	-1.53465	-1.79452	0.159781		-1.3129	-0.864398	-3.26363	-1.31876	-1.63557	-1.32853	0.138973	-0.848352	-2.70938	-0.231802	2.88627	-1.24313	-0.0821424	0.0967007
319	empty	Data not found EMPTY
320	empty	Data not found EMPTY
321	empty	Data not found EMPTY
322	H36426*JK200P1b	H36426		0.656393		0.863787	0.284111	-0.132202		0.0412082			0.842647					1.21417		0.480695	0.552307							1.81416	1.54289			2.48435				0.682417	0.348544										2.33065
323	empty	Data not found EMPTY
324	empty	Data not found EMPTY
325	AA026644*1E1	transcription factor 3 (E2A immunoglobulin enhancer binding factors E12/E47) TCF3	Hs.101047	0.559431	0.185359	-0.421475	-0.113907	-0.308379	-0.10096	0.232571	0.372953	0.0684718	0.0317044	0.0820249	-0.0479102	0.202516		0.295593		0.0890021	0.552853	0.0781498	0.186106	0.415789	0.241633	0.583002	-0.048745	-0.143801	0.0892512	0.257459		0.284164	0.547545	-0.236225		-0.110427	-0.16624	0.359285	-0.0154842	0.275924	0.0161718	0.117203		0.300601	-0.444834	0.134211
326	H80215*1E5	Data not found EMPTY							-1.10205											-2.16741						-0.15724
327	H59861*1E9	thrombomodulin THBD	Hs.2030	-1.19062		-0.819333	-1.56432	-1.91739	-1.26192	-1.28714	-2.25617	-0.954892	-0.624604	-0.137969	-0.979938	-3.12452		-1.26039		-0.342217	-1.14872	-1.362	-1.00645	-1.025	-0.247665	-0.940192	-1.11581	-0.849212	-1.87005	-0.938118	0.210523	-1.19146	-0.233553	-1.62262		-0.219886	-1.22265	-2.0693	-0.959539	-0.725415		-1.66759		-2.25853	-1.68764	-2.42264	-1.2444	-3.28028	-0.595735
328	H93459*2E1	RAB4A, member RAS oncogene family RAB4A	Hs.119007	-0.319871			-0.13962	0.036757	0.184424	0.217397	0.112977	-0.716787	0.394046	-0.745722	-0.338388	-1.26687		-0.452916	-0.37198	-0.207701			-0.0512958	0.504422	-0.489317	0.281124	0.24485	-0.265419		0.0969753		0.543817	-0.617949	0.290781		0.205648	-0.360923	0.0998797	-0.221169	-0.152918	-0.115863	0.491236		-0.308765	-0.173097	-0.421034	-0.926545	-0.519546	-0.701691
329	R08829*2E5	pyruvate kinase, liver and RBC PKLR	Hs.95990	-1.03264	-0.721701		-0.394286	-0.81287	-0.46001	0.164654	-0.0572314	-0.704575	0.0861974	0.127241	-0.168336	-1.71332		-0.973453		-0.197892			0.185665	-0.0340432	-0.225372	-0.188594	-0.692797	-1.16548		-0.774593		-0.132284	0.210659	-0.502287		-0.0285011				-0.318884	-0.597974	-0.401032			-0.785532		-0.484445		0.0573376
330	R38343*2E9	protein tyrosine phosphatase, receptor type, G PTPRG	Hs.89627	1.16231	-0.726601		0.49126	1.16604	0.246763	-1.10543	-0.799723	-1.63855	-0.884675	0.0866223	0.406076	-0.188281		-1.10418		-0.105223			0.0343203	-0.589509	-0.526692	-0.555402	0.421498	0.155029	-0.526658	-1.16487		-1.00556	-0.460552	-0.547675		-0.263888		0.157703	0.792066	-0.840574	0.678532	1.13541		1.97842	0.360612	-0.412687	-0.479793	0.523667
331	H17080*3E1	myelin basic protein MBP	Hs.69547	0.627362	-0.111291		2.38264	4.50241	1.50853	3.58158	1.24447	1.8204	2.12238	0.674952	0.574253	2.06154		0.399662	0.183191	0.340601			1.10515	0.841558	0.292551	0.49854	4.03274	0.273307	0.615228	1.4014		0.53137	0.586459	4.68323	3.77701	4.4429		3.26164	0.90995	0.447683	0.172377	0.159452	2.09421	3.31398	1.19597	1.48433	-0.249063	3.8881	0.718989
332	R55046*3E5	MpV17 transgene, murine homolog, glomerulosclerosis MPV17	Hs.75659	1.20439	-0.816933		-0.895127	-1.16414	0.0977792	0.304868	-0.0108415	-1.12719	-0.239434	0.670925	-0.183393				0.318917	-0.242246			-0.440678	0.481298	-0.0231144	-0.0334395	0.288572			-0.301706			-0.0829572	-0.0628471		-0.661773		0.119786	-0.087028	-0.16684	-0.338672	-0.576307		-1.25092	-0.300208
333	AA411642*3E9	met proto-oncogene (hepatocyte growth factor receptor) MET	Hs.285754	-1.36149	-2.60222		-1.60582	2.08416	-0.228209	0.296939	1.2278	-0.0779452	1.12104	0.294482	0.538748	0.164756		0.0612525	-0.159729	0.477171				1.51984	0.0206458	0.581861	1.78341	-1.97503	-1.09138			0.302295	-0.77079	0.666299		1.33135		1.15075	-1.43878	-2.42033	-0.959133	0.576467		1.10579	-1.57949	0.26288	-0.262185	5.01944
334	H45668*4E1	Kruppel-like factor 4 (gut)	Hs.7934	2.90278	1.35569		2.83814	1.01036	0.775871	0.947241	1.8247	1.28227	1.90857	1.15852	0.223973				0.407013	0.332218			0.841481	1.78443	0.722799	1.11333	2.01093						2.10123	0.310404	1.88877	0.624735			0.314908	-0.151517	0.938657	0.619789
335	N62620*4E5	potassium channel, subfamily K, member 1 KCNK1	Hs.79351	1.94669	-0.192577		1.03367	1.56575	1.71745	1.28837	1.17198	0.843633	1.72498	1.50538	0.682572				1.05131	0.105843			1.08725	1.50498	1.30316	1.27727	1.26458						1.69769	1.67115		1.21733		1.33702	2.1476	1.24642	0.668658	0.773614
336	R97066*4E9	transglutaminase 2 (C polypeptide, protein-glutamine-gamma-glutamyltransferase) TGM2	Hs.8265	0.539058	-1.70365		0.240106	2.583	0.495306	-0.551781	3.79517	-2.75411	-0.644911	-0.566078	-0.240915	-1.17275		0.108281		-0.555836			-0.336129	0.382002	-1.06677	-1.28349	1.12153	-1.14691	-0.00200086	-0.00742145		-0.678736		-0.446527		0.751511		-0.800512	-0.804121	0.450532	-0.861334	0.319072		1.60053	-0.814143	0.00106848	-0.152775
337	H90415*JK200C1a	breast cancer 1, early onset BRCA1	Hs.194143	-0.0927282	-0.00321834		-0.764557	-0.0591881	-0.922234	0.00749554	1.28706	-1.30192	-0.783326	-1.01961	-0.442286	-1.58104				0.151344			-0.24581	-0.365893		-0.542442		-0.212387	-0.368486	-0.738793		-0.349684		-2.09938		-0.143775				-0.19256	-0.412229	-0.72893		-1.87018	-1.132		-0.314526		-0.0481391
338	AA443351*JK200C9a	v-erb-b2 erythroblastic leukemia viral oncogene homolog 2 ERBB2	Hs.446352	-0.756672	-0.680042	-0.600764	0.648519	0.111791	-0.497733	3.60638	0.58098	1.80907	2.37906	1.6158	1.59321	1.3059				0.817899			2.2421	1.44988	2.71037	0.824316		1.71285	3.09896	2.19904		2.64234		2.22271	0.890417	0.933757		1.22138	-0.882378	2.11934	-0.441307	-0.326044		-0.0570154	0.0785026	3.46944	1.75848
339	empty	SSC blank							-4.22928							-5.51892			-4.19691	-3.54053						-3.65618		-5.88223	-6.42256	-5.62934		-4.60318													-5.71538	-5.50816	-6.09114
340	AA862999*JK200G1a	calcium-sensing receptor CASR	Hs.435615	-0.182264	-0.576503	-0.332444	-0.284137	0.0154216	-0.810424	-1.43422	-0.936135	-1.40332	-2.25273	-0.565817	-1.09436				-0.488819	0.339809			-0.549521		-4.6876	-0.610097		-0.906651		-1.06866		-1.25684	1.66573	-1.18512		-0.0599631		-1.67139	-1.37233	-1.11252	-2.04294	-0.235817		-1.2426	-0.922521
341	AA877845*JK200G9a	LIM domain kinase 2 LIMK2	Hs.474596	0.0192343	-0.566809	0.0818424	0.576443	-0.0535565	-0.236948	-0.111876	-0.63832	0.0189942	-0.043485	0.24079	-0.00609707	0.060425			0.0571581	-0.321788			0.585762	-0.331772	0.625207	0.0890066	-0.133044	-0.449275	0.544429	0.336315		0.167066		0.186627		0.151847		0.342159	0.410852	-0.252992	-0.0289915	-0.442856	0.0787208	-0.30356	0.136212	-0.0429108	-0.416231		-0.767272
342	AA040703*JK200G17a	profilin 2 PFN2	Hs.91747	0.907738	-0.863351	-0.0844558		-0.697324	0.723984	-0.190573	-1.0003	-0.228837	0.184938	-0.357521	-2.03303	-0.596606		0.0183286	-0.26172	-0.275835			-0.890549	-2.15627	0.407428	0.904516	-1.05768	-0.82495	-0.397158	-0.0239181		-1.43838	-1.95404	-0.272404		-1.41636		0.00768628	-0.254783	-0.801426	-1.04068	-2.97665	-1.35894	-1.84134	-0.449109
343	empty	Data not found EMPTY
344	empty	Data not found EMPTY
345	empty	Data not found EMPTY
346	T43086*JK200O1a	T43086			0.191508	1.46394	0.786911			0.426554										0.649918																0.911582						1.5355
347	empty	Data not found EMPTY
348	empty	Data not found EMPTY
349	AA457726*5E1	myeloid leukemia factor 2 MLF2	Hs.79026	-0.624173	-0.341796	-0.480734	-0.634512	-1.02665	-0.22448	-0.491893	0.635268	-0.560638	-0.312324	-0.454828	-0.452143	-0.33209			-0.526151	-1.07833	-0.259637	-0.173067	0.0168746	-0.186393	-0.828475	0.01868	-0.349403	-0.213751	-0.148664	0.0355252		-0.242822	-0.213878	0.348163	-0.545871	0.190063	-0.196936	0.204045	0.131044	-0.315117	-0.0974753	-0.676839	-0.35994	-0.698966	-0.612386		0.0130771
350	H54686*5E5	H54686		-0.679251	-1.4827	-1.03037	0.168685	-0.173076	-0.272804	0.41045	0.222108		-0.380576	-0.592921	-0.450747				-0.663899	0.0918001	-1.35839	-0.0695311		-0.185158	-0.0282798	-0.474365	-0.222863	-0.926569	-0.516679	-0.216926		-0.895401	-0.61219	0.49897		-0.139204	-0.691325		-0.219581	-0.390022	0.229222	0.825995		-0.219769	-0.956938	1.0102	-1.20811
351	H72937*5E9	2,4-dienoyl CoA reductase 1, mitochondrial DECR1	Hs.81548	0.687442		0.242716	0.0330831	0.360275	0.495752	0.959324	0.746021	1.27575	1.03391	0.798057	0.497527				1.23494	0.733322	1.14542	0.646475	1.19798	1.36265	1.19463	1.60826	0.694269						1.2831	0.829831	1.4145	0.822734	0.923828	1.67573	0.859856	1.49007	0.33755	0.322508	0.248968
352	N59851*6E1	WAS protein family, member 1 WASF1	Hs.75850	0.460952	0.60388	-0.319034	-1.32892	-0.524673	0.661361	0.0297939	0.0137637	-0.278287	-0.124648	0.533291	-0.118159				-0.110033	-0.0139445	-0.532451	-0.562893	-0.191175	0.479789	-0.128354	-0.214034	-0.000729994						0.155648	-0.165123		-0.505754	-0.0899231	0.246133	-0.034552	-0.0461076	-0.294541	-0.579292
353	N80922*6E5	KIAA0260 protein	Hs.82635	0.109106	-0.385535	0.446977	-0.364982	0.277031	0.543932	-0.427338	0.731582	1.08301	1.06622	0.632411	0.792872	1.5002			1.2689	0.224916	0.785057	0.582458	0.329693	0.851617	0.594148			0.518315	0.265179	0.538448		0.619681	0.277581	0.245578		1.54381	0.584966	1.90988	0.810005	0.576662	-0.258653	0.121258		0.979864	0.835972		0.539844
354	T90118*6E9	KIAA0250 gene product	Hs.15087	0.579973	0.297142	-1.08681	-0.627095	-0.317291	-0.116752	0.137275	-0.0912392	-0.383818	-0.0347407	-0.215685	-0.47627				-0.214098		-0.445749	-0.403895	-0.0599382	0.273705	-0.850522	-0.220016	-0.236579						-1.02844	-0.266109	-0.836962	0.628293	0.0562608	-0.528921	-0.360586	-0.517208	-0.989376	-0.180303		-0.696777	-0.468117
355	AA428321*7E1	N-deacetylase/N-sulfotransferase (heparan glucosaminyl) 2 NDST2	Hs.78473	0.610476	0.518918	0.0761469	0.335603	0.773734	0.0645538	0.420596	0.255596	0.68924	0.374972	0.586326	0.647433	0.334664			0.752974	0.403415	1.05216	0.374616	0.774797	1.03802	0.182064	0.680274		0.0395843	-0.227054	0.514325		0.466727	0.0345118	0.377816	-0.572482	-0.0431027	0.139004	0.0828262	0.591462	0.574666	0.329266	0.300463		0.438704	0.278633	0.0837867	0.654701		0.315479
356	AA012882*7E5	RAB interacting factor RABIF	Hs.90875	-0.335261	0.12673	0.048094	-0.0885955	-0.0135213	-0.0502779	0.107898	0.0365304	0.0295103	-0.00481747	0.0761975	-0.00387405				0.250121	0.0581615	0.00359456	-0.159763	0.0874197	0.493138	-0.13084	0.0382381							0.0558402	0.154052	-0.276249	0.119885	0.169244	0.0701205	-0.00264035	0.161772	0.0541899	0.075613
357	AA411679*7E9	glycogenin GYG	Hs.174071	-0.529342		-0.303088	-0.228965	0.162904	0.432711	0.286042	0.107181	0.711178	0.00253003	-0.450114	-0.547483				0.225408	-0.128129	0.411651	0.220614	0.305163	0.675923	-0.256247	0.561424	-0.275112						0.473514	0.35902	-0.0239617	0.402889	-0.0974618	0.415098	-0.526426	0.65786	0.729842	0.412014
358	H45618*8E1	H45618		0.458918	-0.000371938	0.0270265	0.171476		0.394537	0.660196	0.504605	0.699125	0.390736	0.103161	0.301548				0.418316	0.28234	0.413301	-0.0933774	0.898573	0.357111	0.103792	0.467092							0.347158	0.339883		0.215357	0.0925806	1.10306	0.0208646	0.343443	-0.172855	0.123016
359	AA451741*8E5	ilvB (bacterial acetolactate synthase)-like ILVBL	Hs.78880	-0.684246	-0.308899	-0.362975	0.39314	-0.220772	-0.892923	0.603784	0.345455	0.706608	1.36774	0.265261	-0.0707978				0.0796732	0.0387963	0.637806	0.170047	1.46435	0.729644	1.00534	0.77766	-0.46631			1.02175			0.109643	0.928603	0.135981	0.283329	0.195849	0.360409	-0.0245799	0.127472	-0.343526	-0.02751		-0.766604	0.598161				0.216999
360	R55789*8E9	amyloid beta (A4) precursor protein-binding, family A, member 2 (X11-like) APBA2	Hs.26468		0.287456	-0.155437	0.189241	0.13252	0.48601	1.32686	0.483445	1.08245	0.496022	0.341224	0.21731				0.923655	0.566527	1.42046	0.492974	1.07049	0.840835	0.188795	1.08086	0.839088						0.97574	0.308854	0.476997	0.738338	0.567137	0.633586	-0.0548349	0.67441	0.212993	0.498477
361	N66843*45E1	ESTs N66843	Hs.35608	0.667505	0.680449	0.591104	0.413669	0.452579	0.414147	0.515255	0.437836		0.506295	0.696863	1.26928				0.540457	0.258492	0.57298	0.451769		0.827126		-0.298489							0.340675	0.0487791		0.757254	0.888199			1.29173	1	0.897343
362	R97234*45E5	ESTs R97234	Hs.35701	0.702934	0.0192311	0.594542	0.517143	0.865993	0.923576	0.663817	0.440652		0.812605	0.883531	0.765765				-0.44822	1.59902	0.230332	0.736213		0.859227	0.921382	-0.682125	0.804354	0.423325					1.05769	0.892063		0.864687	0.454259	1.03858		1.26009	1.21618	1.26373		0.105547	0.461123
363	R97986*45E9	ESTs R97986	Hs.330992	0.769202	0.721106	0.823178	0.42297	0.282767	0.0970033	0.287449	0.0042405		0.220158	0.423584	1.18526				1.02398	0.223263	0.923918	0.615004		0.952911	0.560284	-0.534183							0.232377			0.473524	0.987935			1.09256	0.801924	0.75756		0.203749	0.142527
364	H55897*46E1	ESTs, Weakly similar to hypothetical protein FLJ20489 H55897	Hs.268947	0.0879956	0.279437	0.138897	-0.316003	-0.177137	-0.41084	-0.242449	-0.0892161		-0.0525637	0.00177572	0.200679				0.393111	0.515022	0.639736	0.140376		0.238924	0.14504	-0.702551		-0.100264	0.132672	-0.943818			-0.187926	-0.623103		-0.0642303	0.542726		-1.24267	0.232414	0.382973	-0.31126		-0.0978847	-0.247788
365	H56424*46E5	ESTs H56424	Hs.295050	0.133668	0.0396545	0.146301	-0.0327674	0.12292	-0.0469514	-0.254142	0.0124356	0.436251	-0.236809	0.219346	0.467752	-0.80559			0.384515	0.259802	0.176324	0.107283		0.345781	0.79533	-0.102164	-0.277153	0.244581	0.110375			-0.158809	-0.167419	-0.399054		0.24982	0.393922		-0.875004		0.597084	0.4157		-0.227737	0.0626684	-0.0879587	-0.0403587		0.218277
366	H95358*46E9	hypothetical protein LOC199920 LOC199920	Hs.145526	-0.122041	0.294096	0.706368	0.80161	1.11221	-0.164802	0.643649	0.322097	1.21662	0.734121	0.720705	0.710516				0.684421	0.335806	0.846235	0.780403		1.11277	0.491483	0.0781457	0.3774						0.793567	0.697972	0.372282	0.794599	0.657293		-0.00219323	1.82101	0.435696	0.424291		0.101808	-0.0521965
367	H90415*RJ200 AE1	breast cancer 1, early onset BRCA1	Hs.194143	-0.0603466	-0.140533	0.149817	-0.194469	-0.00733459	0.0278624	-0.110388	0.483559	-0.183033	-0.223692	-0.199274	0.266168				0.103536	0.384011	-0.298444	0.234844		0.211571	0.166968	-0.0805056	0.122487						0.0808333	0.0655127	0.0531441	0.349672	0.218428	-1.29692	-0.195545	0.159531	0.101089	0.154295
368	AA443351*RJ200 AE5	v-erb-b2 erythroblastic leukemia viral oncogene homolog 2 ERBB2	Hs.446352	-0.0141702	-0.191453	0.66082	0.237629	0.648467	0.0158608	0.489337	0.347438	0.204983	-0.608674	-0.661356					-0.595706	-0.450138	-0.0114181	0.526522		0.220967			0.745664	-0.0406758	0.454616	0.437647			0.360203			0.162706	0.146979		0.548648		0.126527	0.322344		-0.527542	-0.189569				-0.114142
369	EMPTY	Data not found EMPTY
370	AA862999*RJ200 AE1	calcium-sensing receptor CASR	Hs.435615	0.928489	0.58896	0.986046	0.741343	0.650896		0.661671	0.235211		-0.528657	1.55946	1.64088				-0.0221755	0.304502	0.189121	2.20282		1.24531									3.18475			0.842381	0.743795				0.700157	1.44769
371	AA877845*RJ200 AE5	LIM domain kinase 2 LIMK2	Hs.474596	-0.125796	-0.4792	0.281285	0.803528	-0.247482	-0.024642	0.085273	-0.634581	0.411412	0.101627	0.413164	0.571357				-0.147591	0.20455	0.353576	0.45196	0.535166	0.0581796	1.31462	0.405109	0.179834						0.351913	0.696084	-0.561327	0.039054	-0.0709361	0.721698	0.32021	0.41676	0.209257	-0.261261	0.783741
372	AA040703*RJ200 AE9	profilin 2 PFN2	Hs.91747	1.03416	-0.900808	0.0631359	-0.834646	-0.654208	0.795231	-0.159178	-0.818997	-0.107548	0.281825	-0.278974	-1.57003				-0.23575	0.217613	0.0790147	-0.178165	-0.752951	-1.89847	0.765032	0.877176	-1.09456						-1.39423	-0.131026	-0.383787	-1.16315	-0.913862	0.100292	-0.229542	-0.340626	-0.743779	-2.4821	-1.17089
373	T81033*9E1	zinc finger protein 148 (pHZ-52) ZNF148	Hs.380334	-0.730798	-0.216689	-0.896623	-0.847209	-0.595202	-0.164298	0.809772	-0.351115	0.441147	0.112819	0.168163	-0.103481				-0.13643	-0.220369	-0.543186	-0.124098	-0.0696498	0.409873	0.742946	0.367714	-0.933399						-0.280156	0.246812	0.450743	-0.0977121	0.703129	0.0945033	-0.828097	-0.448888	-0.299245	-0.721216	-0.297772
374	H09111*9E5	hypothetical protein CG003 13CDNA73	Hs.181304	-2.168	-4.83479	-4.34221	-3.04112	-4.08033	-3.37371	-3.90652	-4.77857	-1.22301	-0.800096	-1.33374	1.13028				2.68034	3.34659	0.963131	1.44187	2.53125	2.98641	-2.63133	-1.24431	-3.94195						-1.93127	-1.73957	1.24618	2.50682	0.356569	-2.58086	-4.08956	2.66241	0.765055	-3.59898	-2.864
375	R50953*9E9	mitogen-activated protein kinase kinase kinase kinase 2 MAP4K2	Hs.82979	0.760555		-0.467591	0.535119	0.0591286	0.735726	0.262669	-0.0350743	-0.214833	0.20466	-0.213524	0.121475				0.410601	-0.0452556	0.0554325	0.356215	1.10387	0.751011	0.336644	0.60444	-0.621786						-0.137196	0.352242	-0.0421366	0.65548	-0.107807	-0.0726099	0.718361	0.352644	0.268708	1.20744	0.894948
376	AA032090*10E1	DEAD/H (Asp-Glu-Ala-Asp/His) box polypeptide 11 DDX11	Hs.27424	-0.361252	-0.623477	-1.25353	-1.74108	-1.26187	-0.996854	-0.773651	0.47015	-0.850361	-0.793801	-0.648723	-0.0461299				-0.706833	-0.862631	-0.491931	-0.547241	0.126092	0.442226	-0.881408	-0.524625	-0.737972						-0.958194	-0.419199	-1.31494	0.0104381	0.0596424	-1.03161	-0.909458	-0.676799	-0.549483	-0.691382	-1.0256
377	H67086*10E5	similar to S. cerevisiae SSM4 TEB4	Hs.20141						-1.46803	-0.541483				-1.70745						0.0562858			1.30475
378	R60723*10E9	purinergic receptor P2X, ligand-gated ion channel, 4 P2RX4	Hs.321709	-0.69468	-0.0564444	-0.691385	-0.522884	-0.718634	-0.782681	-0.0780194	-0.319072	-1.0689	-0.201866	-0.139294	-0.663737				-1.0214	-0.717791	-1.35819	-0.484978	-0.507728	-0.383026	-0.0244976	-0.879433	-0.676924						-0.615672	-0.152143	-0.306433	-0.826567	0.187055	-0.556817	-0.736046	-0.882282	-0.227594	0.260325	-0.103845
379	AA417881*11E1	bleomycin hydrolase BLMH	Hs.78943	-0.547074	0.00252863	0.499981	-0.323489	-0.561873	-0.325971	-0.351002	0.509184	-0.993402	-0.722937	-0.954142	-1.08244				-0.242903	-0.420613	-0.70782	-0.477508	-0.559205	-0.629071	-0.996525	-0.0590289	-0.880068						-0.0141735	-0.690723		-0.471494	-0.529402	-0.324178	-0.731282	-0.715066	-0.181062	-0.41662
380	H15707*11E5	translocating chain-associating membrane protein TRAM	Hs.4147	-0.699451	-0.471905	-0.691523	-0.203999	0.748879	-0.35633	0.0611147	-0.138196	0.129093	-0.125379	0.299459	-0.576668				0.343672	-0.667358	-0.34535	0.324616	-0.434313	1.89658		-0.0997641	0.0966171						-0.161207	-0.362931	0.801625	-0.42294	0.498661	0.449654	-0.46651	0.397604	0.152703	-0.264153	0.334299
381	AA025059*11E9	RAB11A, member RAS oncogene family RAB11A	Hs.75618	-0.72974	-0.0287634	-0.543886	-0.361188	-0.167855	-0.231443	0.777169	-0.356289	1.52206	1.07802	1.12045	0.950089				1.20031	0.571029	0.935094	-0.231027	0.804348	0.876523	0.237365	0.879826	0.0723534						0.571778	0.560882	1.21281	0.44186	1.05955	0.0699848	-0.378482	0.855867	0.981329	-0.0782176	-0.115408
382	R50407*12E1	GRO2 oncogene	Hs.75765	-0.965046	-2.13754	-1.4246	0.165232		0.0370644	-2.54203	-0.172942	-4.18798	-2.66602	-2.74723	-3.63801					-2.05124	-3.31373	-0.0969636	-2.59301	-3.55815	-3.27378	-3.06027	-1.42624						-2.60153	-2.55926	-2.20488	-1.91286	-2.73557	-3.08423	0.369067	-1.83477	0.171514	-0.565597	-0.378529
383	H56069*12E5	glutamate-cysteine ligase, catalytic subunit GCLC	Hs.151393	-0.76454	-0.111436	-0.258954	-0.625116	-0.482149	0.132212	-0.563957	-0.784575	1.35327	-0.233817	0.725585	0.609994				1.14607	0.27243	0.793853	0.0724706	0.526077	0.0765558	0.414897	1.01834	0.115079						-0.183261	0.186625	0.0538739	-0.0179274	-0.108867	0.733542	0.732936	1.134	0.344733	-0.125694	-0.504617
384	H72028*12E9	gelsolin (amyloidosis, Finnish type) GSN	Hs.290070	2.36302	-0.136086	-0.668261	2.9527	0.296777	1.46776	0.166934	-0.216008	-0.180107	-0.119021	-0.753284	-0.127113	-0.598263		0.309804	0.266628	0.109189	0.0269179	-0.0115112	-0.24074	-0.111696	-0.756276	-0.169978	0.117788	-1.59843	0.312365	-0.858354			-0.125204	0.12822	0.392689	0.174485	-1.1456	-0.496436	1.24103	-0.309683	-0.547243	0.188683	0.695888	0.363507	-0.1944				-1.31655
385	R07167*13E1	cystathionase (cystathionine gamma-lyase) CTH	Hs.19904	-0.224139	-0.357693	0.0540391	0.0138905	-0.619586	0.128296	0.72353	1.13639		-1.20696	-0.20785					-1.00695	0.571208	-1.32266	-0.613794		-0.466308	-0.243134	-0.063092	-1.57358						-0.813122	-0.451981		-0.303905	-1.19431			-0.479099		0.156781
386	H82536*13E5	H82536		0.71777	-0.512443	0.986366	1.14476	1.07014	0.723389	-0.0680594	-0.381556		-1.11208	-0.122674	0.0906623			-0.26287	-0.125355	0.161198	-0.907639	0.660669		0.0198951		0.077957		-0.189277	0.31848	-0.239411		-0.100284	-0.322536			0.0823086	-0.429789				1.29488	0.517002			-0.597819		-0.427455	-1.06595
387	R38995*13E9	contactin 1 CNTN1	Hs.143434	3.53262	0.594177	2.23664	2.38936	2.57095	2.23369	2.57302	1.16695	1.53891	1.81435	0.570955	0.868351		1.33652	1.44333		0.815414	1.04302	1.5783		0.744986	1.05499	1.37376	1.11804	1.04799	1.55122	0.942629	1.45393	0.964796	1.23048	1.63023	0.51196	0.76077	1.1215		1.77017	1.59275	1.52824	2.30918	2.68162	2.89809	0.975694	1.95697	1.29599	0.764255
388	N53169*14E1	apolipoprotein C-III APOC3	Hs.73849	-0.282912	-0.126436	-0.799543	-0.355106	-0.927073	-0.52777	0.0644822	-0.552483	0.0127774	0.327476	0.193062	-0.315118	-0.231697	-0.761961	-0.356284	0.295429	-0.0625707	0.362802	0.274252	0.215861	0.671142	0.221573	0.319612	0.0606031	-0.540791	-0.463085	0.100246	0.463692	0.620351	-0.812381	0.779601	-0.685267	0.328614	-0.0224275	0.599507	-0.187935	-0.33623	-0.658556	0.366614	-0.0881583	-0.481973	-0.532359	-0.0469892	-0.305316	-0.728841	0.428284
389	AA102646*14E5	aldehyde dehydrogenase 7 family, member A0	Hs.74294	0.258513	1.20678	0.0872347	-0.472606	-0.950785	0.10956	-1.57509	0.241645	1.23675	1.17732	0.610128	0.117514	1.1454	2.0675	1.27931		0.562704	1.17731	0.454099	1.35567	1.4129	0.45498	1.23152	0.437196	0.706635	-0.955629	1.21802	-0.22235	1.13554	0.340413	1.10837	-0.135343	0.878676	0.657513	1.26764	-1.44509	0.98764	-0.15123	-1.37028		-0.534321	-0.564099	-1.00889	1.73922	-1.73013	-0.326386
390	H15446*14E9	annexin A7 ANXA7	Hs.78637	-0.54053	1.9982	-0.875081	-0.598664	-1.30869	-0.644912	-1.08771	-1.27667	0.155526	-0.1886	-0.956355	0.126627			0.734555		0.502957	-0.395873	-0.561621		1.30713	-0.457691		-0.673381	-0.41695	-1.38977	0.00285445	-0.818584	0.328875	0.417396	-0.202523		-0.801939	-1.28379	-0.0104862		0.582858	-1.0879	-0.772301		-0.698262	-1.38447	-0.814058	-0.00864507	-0.850031	0.121577
391	AA432062*15E1	tyrosine kinase with immunoglobulin and epidermal growth factor homology domains TIE1	Hs.78824	-1.34038	-0.252907	-3.11891	-2.2672	-2.68588	0.11444	-1.91361	-1.84202	-3.6778	-4.36778	-3.52823	-3.25357	-4.10382		-2.05245	-3.11003	-1.73385	-4.59939	-2.1132	-3.21574	-3.82306	-2.66137	-2.62886	-2.14681	-3.18317	-2.16696		-2.40907	-3.33805	-2.73083	-3.1026	-2.51562	-2.87026	-3.41739	-2.47741	-1.33597	-2.96277	-2.62461	-1.51919	-0.690462	-2.17294	-2.17473	-2.11964	-2.73524	-2.32981	-2.58122
392	AA180742*15E5	thromboxane A2 receptor TBXA2R	Hs.442530	-0.25905	0.132236	0.00198248	-0.145656	-0.685882	0.170026	-0.957325	-0.742163	-2.92086	-1.96894	-1.82888	-1.1359			0.113871		0.684415	-0.339512	0.157684		-1.42372	-1.14167	-0.533219	-0.963903						-0.0103477	-1.49605		0.508172	-0.126687		-0.943522	-0.891005	-1.46887	0.0849735
393	T61445*15E9	topoisomerase (DNA) II alpha (170kD)	Hs.156346	-0.969589	0.540357	-2.06069	-1.92222	-0.965991	-1.16213	-0.919267	0.317737	-3.00969	-1.92818	-1.18124	-1.09611	-3.92099	-3.06427	-2.98495	-2.46335	-1.58575	-3.80604	-1.09498	-2.16331	-1.1156	-0.458555	-1.86179	-0.916516	0.289307	-0.281101	-2.12246	0.609532	-0.966236	-1.81397	-1.17726	-0.827793	-1.49966	-0.850668	-0.313608	-0.950776	-2.03728	-1.13994	-0.705911	-2.26895	-1.93587	-0.448339	-0.367582	-1.16097	-0.720644	-0.588273
394	AA405562*16E1	protein phosphatase 4 (formerly X), catalytic subunit PPP4C	Hs.2903	-1.16457	-0.695494	-0.0384224	0.0997539	-0.836708	-0.146262	-0.434637	-0.792032	0.104626	-0.108948	0.306411	0.279949	-0.112981	0.0847687	-0.162876		0.862639	-0.0117638	-0.528475	-0.112412	0.16895	-0.332151	0.483304	-0.240023	0.746404	-0.188312	-0.546519	-0.00973895	-0.530804	-0.541206	-0.486233	-0.578922	0.648274	0.818831	0.341448	-0.0893223	-0.970653	-0.202923	-0.436749	-0.652605		-0.192904	-0.196561	0.399357	-0.254132	-0.550162
395	AA180007*16E5	protein kinase, cAMP-dependent, regulatory, type II, beta PRKAR2B	Hs.77439	-0.331001	1.0423	-1.64357	-0.722836	-1.66014	-1.06704	-1.71972	-1.46786	-2.44038	-2.47005	-2.01362	0.054222	-1.33498	-2.19787	-1.66713	-1.00769	-0.259572	-2.4931	-1.64275	-0.696366	-1.87667	-1.71899	-2.55923	-1.17589	-1.47384	-0.236369	-2.686	0.223644	-2.76683	-0.362306	-0.210981	-1.15278	-1.24644	-1.80168		-2.40641	-1.73899	-2.48666	-1.99856	-0.616959	-0.12108	-2.02554	-0.182396	-2.2969		-2.02872
396	AA485909*16E9	prostatic binding protein PBP	Hs.80423	0.381763	1.34712	-1.38788	-2.04043	-1.26801	-0.619208	1.59373	-0.436881	0.37313	0.148409	0.0242009	-0.819406	0.266794	0.279044	0.60262	-0.108482	0.233794	0.401082	-0.331271	-0.27871	0.678347	-0.757553	0.370862	-0.981497	0.449063	1.07932	1.00146	1.07897	0.235341	0.325715	0.772429	-0.224348	-0.684384	1.96885	-0.10656	-0.638016	0.0119107	-0.344902	0.612993	0.13577	-0.906064	-0.748177	0.612423	0.0623952	-0.402319	0.206287
397	AA486532*17E1	major histocompatibility complex, class II, DP beta 1 HLA-DPB1	Hs.814	3.38667	2.65924		4.52336	4.73937	3.27717	3.4013	2.89902		2.65193	1.04685	4.12019	3.08832	2.89831	1.57444		0.27722	1.22489	2.64757	1.66627	1.83791	1.35836	1.29077	2.86633	-0.226808	3.70865	1.82761		2.70239	1.23348	1.65674	1.09486	0.549059	1.03419	2.88983	4.52241	2.716	3.19501	4.71414	4.60771	5.44866	2.13313	4.26818	2.32965	2.80801	1.07209
398	AA283744*17E5	MADS box transcription enhancer factor 2 MEF2A	Hs.182280	0.0385721	0.676599	-0.186026	0.258839	0.151402	0.711632	-0.0203205	0.222176	0.0593744	0.318896	-0.061667	0.77873		-0.81366	-0.716905		-0.164366	0.00737238	-0.131954	-0.143854	0.502718	0.16305	0.520958	0.205257	0.0453472	-0.793024	-0.0194918	0.140459	-0.00137695	-0.367969	-0.248767	0.0359123	0.24604	0.101059		0.550144	0.652576	0.30377	0.612234	0.715971	0.106668	0.396722	-0.387181	0.542469	-0.709332	0.210669
399	AA458472*17E9	major histocompatibility complex, class II, DQ beta 1 HLA-DQB1	Hs.73931	2.673	0.736499	2.15749	3.72426	4.73763	2.56813	1.2755	0.546468	-0.132026	0.244837	0.978681	0.619779	0.517786	-0.00198535	0.87387			0.919406	1.59224	0.336756	0.845408	0.502167	0.424479	1.87291		1.27748	0.0785024	0.074866	0.246121	0.671219	-0.0440895	0.391186	-0.685584	0.516644		1.623	0.396154	0.318009	1.49821	1.86571	3.68145	0.177884	2.18523	0.417756	0.713463	0.616247
400	AA455925*18E1	four and a half LIM domains 1 FHL1	Hs.239069	-2.10222	-1.16015	-2.54967	-2.26606	-1.97602	-0.385304	-1.53197	-2.34238	-3.69644	-2.6719	-2.77769	-2.7555			-2.27234	-1.83009	-0.895405	-1.89653	-2.0088	-1.98411	-3.91554	-2.94694	-2.07383	-2.72202	-3.39346	-4.49958	-4.68678	-5.85224	-3.26966	-2.9077	-2.69918	-2.00664	-3.87396	-3.7533		-2.85044	-3.4409	-2.60946	-1.87212	-1.05396	-1.29956	-4.49693	-3.72353	-5.91084		-3.41659
401	AA488622*18E5	signal transducing adaptor molecule (SH3 domain and ITAM motif) 1 STAM	Hs.153487	-0.489054	0.142768	-0.200899	-0.177728	-0.596684	-0.133182	-0.802358	0.136216	0.299622	0.753315	-0.294941	0.0316106			-0.459028	0.223358	0.350941	0.370811	0.392413	0.822889	0.47104	-0.421741	0.113186	-0.135404	-0.502215	0.0368323	0.164308	-0.99274	0.0742258	0.199257	0.273276	-0.290712	0.251902	-0.122564	-0.542321	-0.227253	-0.108261	-0.274362	0.259938	-0.0164478	-0.112565	-0.144968	-0.59727	-0.431153	-0.345272	0.526142
402	AA196465*18E9	sarcolipin SLN	Hs.334629	0.269071	0.739999		1.73048	2.24491	0.54614	0.766494		0.116511	0.388804							0.305784	0.514237					0.35922										0.267887						1.38325	1.45903
403	AA490617*19E1	vaccinia related kinase 2 VRK2	Hs.82771	0.206809	0.830084	-0.311291	-0.0966859	0.505923	0.695902	0.0740641	0.536206	0.0199668	0.326018	0.111836	0.305979				0.671763	0.0885904	-0.105386	-0.124704	-0.21317	0.99055	0.211692	0.146677	0.534521						-0.429677	-0.316107	-0.473429	0.223291	0.65175	-0.0855368	0.412436	0.00377442	0.608975	-0.274252	-0.210645
404	R45235*19E5	stromal cell-derived factor 2 SDF2	Hs.118684	0.409555	0.519912	-0.153058	0.194419	0.197563	-0.570321	1.07994	1.88644	0.400266	0.354667	-0.0774611	-0.235412	0.300549	0.294924	0.705264		0.383927	0.395771	0.433806	0.598766	0.548743	0.340455	0.37054	0.243508	0.0206902	-0.451323	0.223773	0.256277	1.0431	-0.390871	0.7364	0.017563	0.0656433	0.0527038	0.703636	0.31975	0.236858	-0.0282008	0.603867	0.102749	-0.328512	1.30894	0.917388	0.115121	0.747439	0.10183
405	AA192422*19E9	fucosyltransferase 8 (alpha (1,6) fucosyltransferase) FUT8	Hs.118722	0.25777	-0.584189	1.16047	0.42427	2.13614	0.535781	0.176421	1.07592	-0.535142	0.738829		0.296043			-0.247336		0.544792	-0.0860989	1.16673		0.681626				-0.786239	0.0415936	0.72847	0.401214	0.0144952				0.746434	-0.0539196			-0.292104		1.22167	0.800756	2.31044	0.0844701		-0.0828253	4.11401	-1.12948
406	AA454572*20E1	AA454572		-0.239534	0.080154	-0.442517	-0.991528	-0.301181	-0.111502	0.703715	0.671974	-1.61391	-0.797071	-1.08519	-1.00394			-1.62018	-0.493542	-0.805695	-2.5067	-0.260472		-0.949608		-0.830884	-1.37621	-1.73791	0.648054	-1.47778	-0.497173	-0.696148	-0.560566	0.082859	-1.68402	-0.66013	-1.05849		-0.761766	-0.880613	-1.36086	-0.188898		-2.01685	-1.49854		-1.52607	-0.997849	-0.329897
407	AA482228*20E5	24-dehydrocholesterol reductase DHCR24	Hs.75616	-0.474785	-1.25439	-1.52746	-0.207122	0.286483	-0.769918	1.51545	-1.44274	-1.96846	-0.432328	-0.125869	-0.463878	-2.95666	-2.26474	-1.77044	-1.70985	-0.82691	-3.56278	-0.961105	-1.93488	-0.784592	-1.04494	-2.33868	-1.28013	-1.57129	0.337343	-0.919945	0.605381	1.1444	-1.57591	-0.131882	-2.33677	-1.19536	-1.13415	-0.202411	-1.44031	-1.89624	-1.07432	-0.557412	0.181108	-1.72657	-0.0841892	1.10564	-2.14003	-0.466147	-0.487459
408	AA428029*20E9	KIAA0005 gene product	Hs.155291	-1.03655	-0.720522	-0.930966	-0.210945	0.193367	-0.234089	-0.510427	1.02449	-0.120237	-0.264341	-0.0115299	-0.41397	-1.99601	-0.255085	-1.58612	-0.228663	-0.506016	-0.546349	-0.467252	-0.98929	-0.690353	-0.0548319	0.406856	0.555399	-0.00392048	-0.143779	-1.06357	-0.779615	-0.82373	-0.628896	-1.00112	-0.301778	-0.0276711	-0.564267	-0.044456	-0.495703	-0.586929	-0.17642	-1.30809	-0.650613	-0.549987	-1.17062	-1.20481	-0.0430057	0.0318376	-0.0491579
409	AA485653*21E1	mannosyl (alpha-1,6-)-glycoprotein beta-1,2-N-acetylglucosaminyltransferase MGAT2	Hs.172195	-0.546301	-0.564936	-0.340401	0.127583	0.294398	-0.150281	-0.0138782	0.127073	0.241664	0.00908859	0.00168674	-0.105675	-0.717112	-0.507322	0.11708	-0.211066	-0.0775142	-0.162775	-0.0147375	0.222502	0.0224186	-0.251747	0.306284	-0.186972	-0.195896	-0.544649	-0.266083	-0.569879	0.0978534	-1.02401	0.208784		-0.352448	-0.22553	-0.0555689	0.0591178	-0.0994985	-0.294099	0.158695	0.0982369	0.0307133	-0.733466	-0.477063	0.0560439	0.179961	-0.264117
410	AA450227*21E5	proteasome (prosome, macropain) 26S subunit, non-ATPase, 3	Hs.148495	1.7662	0.328258	0.114928	0.846723	0.855689	0.653686	0.918767	0.0753865	0.318228	0.200895	0.241235	-0.116124	-0.939878	0.138137	0.844819	-0.242	0.345086	-0.0689552	0.54654	0.243535	0.576661	0.216059	0.252148	0.67431	-0.133334	0.259276	0.508935	0.30388	0.126096	-0.0343787	0.177163	-0.20103	0.0653819	-0.109005	0.364736	0.534226	-0.0952921	-0.107927	0.300681	0.205281	0.36585	0.0599321	0.670578	-0.137563	0.229008	0.346987
411	AA460823*21E9	sarcoglycan, alpha (50kDa dystrophin-associated glycoprotein) SGCA	Hs.99931	0.592676	0.382576	0.324214	0.182343	0.58419	0.655445	0.888119	0.513286	0.512766	0.266151	0.654796	0.0783632			0.0731896	-0.912559	0.502909	0.434305	0.717361	0.891202	0.647051	0.0623183	0.331116	0.472078	0.264995	-0.11767	0.842985		0.398538	0.621521	0.582479		0.465616	0.32897		0.588656	0.339458	-0.116327	0.705883	-0.0425289		-0.0567962			-1.26081
412	AA458994*22E1	polymyositis/scleroderma autoantigen 1, 75kDa PMSCL1	Hs.91728	-1.4335	-0.097215	-1.04662	-1.05883	-0.972472	-0.944748	-0.907274	-0.468089	-1.31595	-1.8007	-1.03087	-1.1032	-2.06497	-2.51353	-1.31084	-1.36403	-1.12562	-1.62687	-0.693311	-1.15407	-1.049	-0.897768	-0.798594	-0.931519	-0.429397	-0.339591	-1.47143	-0.808878	-0.945424	-0.844629	-0.90931	-1.25903	-0.566705	-0.346159	-0.928528	-0.544387	-0.947882	-1.0348	-0.52136	-1.58229	-1.69318	-0.836702	-0.770044	-0.83531	-0.402933	0.305341
413	AA459100*22E5	tumor protein D52 TPD52	Hs.2384	-0.510939	1.53689	-0.28056	0.378253	-0.539055	-0.262329	-0.747957	-0.216632	0.0793471	0.0497424	0.913482	0.0542046	-0.157746	0.147433	-0.78796	-0.351841	-0.132938	-0.439377	-0.284936	-0.690308	-0.148001	0.355151	0.887675	-0.77422	-0.169375	-0.0775363	0.447031	1.41035	-0.147414	1.07466	-0.0353713	0.829696	0.355102	0.35538	0.542585	-0.453971	-0.0620156	0.18736	0.0684255	-0.386586	-0.0524271	0.159254	-0.883135	-1.54263	-0.103486	-0.640305
414	AA521422*22E9	HRIHFB2206 protein HRIHFB2206	Hs.82508	-0.238873	0.819016	-0.802859	0.433348	-0.457627	-0.110162	0.214499	0.109229	0.0438327	0.172498	-0.22258	-0.155181	0.139006	-0.0891727	0.553741	-0.0436961	0.150946	-0.0581973	0.265033	0.728842	-0.317008	0.511854	0.316748	-0.096453	-0.525931	-0.585862		-0.851435	0.385014	0.0448367	0.022619	-0.768749	-0.0628178	-0.295318	0.208323	0.134619	0.108341	-0.334957	-0.125774	-0.303627	-0.614261	-0.082822	-0.166684	0.0544401		-0.551686
415	AA487434*23E1	monocyte to macrophage differentiation-associated MMD	Hs.79889	-0.384167	-0.572907		-0.749944	-0.514849	-0.435619	-0.972417	-0.155906	-1.17154	-0.214103	-0.83487	-0.631746	-1.06772	-1.19768	-1.1413	-0.67835	-0.788226	-1.31871	-0.401216	-0.890879	-0.785029	-1.08624	-0.42218	-0.234267	-1.10427	-0.172807	-0.687651	-0.970403		-1.1688	-0.729307	-0.596686	-0.573808	-0.615326	-0.612917	-0.621824	-0.398516	-0.137854	-0.455951	-0.38684	-1.03746	-1.15205	-0.559636	-0.77307	-0.364575	-0.30852
416	AA449234*23E5	smoothelin SMTN	Hs.149098	0.136273	-0.178244	0.321909	-0.39453	-0.128707	0.108566	-0.781379	-0.0492701	-0.75972	0.228648	-0.170277	-0.681878		-0.855709	-0.49028	-0.408086	-0.324984	-0.929313	0.588004	0.104336	-0.241405	0.556399	0.160557	-0.182929	-0.387039	0.0671904	0.30213		-0.415501	-0.459471	0.507062	-0.242225	-0.330744	0.35908	-1.01475	0.1962	-0.311938	-0.209066	0.365782	-0.273345	-0.52834	-0.729567	-0.896444	0.225337	-0.585037	-0.338565
417	AA406613*23E9	Ras-related GTP-binding protein RAGA	Hs.57304	-0.385514	0.419838	0.54174	0.0642094	0.532857	0.0971252	0.826506	-0.307691	0.494949	0.322451	-0.25698	-0.779996	0.922068	0.616223	0.871883	0.568684	0.298961	0.526148	0.418953	0.474429	0.0488957	0.744783	0.199337	0.58373	-0.239358	-0.437651	0.433931	-0.245119	-0.0771687	0.468402	0.155955	0.00805416	0.284252	0.062648	-0.0715902	0.557566	0.404706	0.312397	0.23896	-0.0964418	-0.330288	0.553326	0.493703	0.231167	-0.542965	-0.475023
418	AA278698*24E1	DNA segment, numerous copies, expressed probes (GS1 gene)	Hs.78991	0.387652	0.0191868	0.502411	1.08438	0.913486	0.580956	0.301348	0.53518	-0.205059	0.24709	0.0574246	0.0550003	0.184387	-0.283569	0.400552	0.35138	0.179929	-0.415779	0.705759	0.503163	0.13193	0.392958	0.422756	0.395161	0.0811763	0.195414	0.177691	0.214083	0.0146457	0.0404373	0.332921	0.17982	0.0425915	-0.0238519	0.327202	1.17524	0.326112	0.790117	0.699054	0.594331	0.0561824	0.175404	0.981743	0.635964	0.0364724	-0.178958
419	AA150687*24E5	gamma-glutamyltransferase-like activity 1 GGTLA1	Hs.1675	1.20256	-0.096902			0.501134	0.407187	0.15074	0.157984	-0.00986655	0.508575	0.356781	-0.153102			0.379819	0.626813	0.358142	-0.0719055	0.799053		0.137654	0.564524	0.642195	0.508319	0.042477	-0.018127	0.394894		-0.319175	0.055399	0.580449		0.630641	0.155186		1.35015	0.601368	0.847566	0.989836	0.598471	0.835344	1.51905		0.622189		0.245384
420	AA458992*24E9	follicular lymphoma variant translocation 1 FVT1	Hs.74050	-0.285957	0.240473	0.0103741	0.537397	1.07606	0.744062	0.670872	0.599271	-0.0990977	0.106505	0.0997858	0.32753		-0.790885	1.27777	0.403171	0.0224227	0.0921204	0.0463771	0.333169	-0.0747671	0.446902	0.589783	0.420972	0.12868	-0.187116	0.428766	-0.105038	-0.162881	0.175582	0.426885		0.397682	0.219282	-0.222823	0.734862	0.428824	1.28768	-0.485929	-0.0463695	-0.515308	0.5938	0.292817	0.244751	-0.303737	0.0309821
421	AA293218*25E1	cleavage stimulation factor, 3' pre-RNA, subunit 2, 64kDa CSTF2	Hs.693	-0.423818	0.548831	0.351515	-0.321718	0.206937	-0.119112	0.522795	-0.0302548	0.0984981	0.121444	0.899623	0.112858	-0.269971	-0.3328	0.821959	0.546446	0.284631	0.106507	-0.284471	-0.264037	0.744719	0.175746	0.159317	0.402467		0.286717	0.0779624	0.219332	-0.159911	0.561192	-0.0644408		-0.449512	-0.145519	0.371438	0.349695	0.0250389	-0.166547	0.10352	-0.286633	-0.576571	0.188067	-0.101117	-0.162589	-0.0975967	0.455668
422	AA598668*25E5	chimerin (chimaerin) 1 CHN1	Hs.169965	1.13302	1.57075		0.947977	0.942595	-0.218542	0.251244	0.993137	-0.983161	0.0511961	0.12694	-0.232512		-0.385235	-0.620531		-0.0294098	-0.187959	-0.142832	-0.0976641	0.122156	-0.141585	0.282569		0.548894	0.150335	0.511277	-0.300659	-0.151223	0.204183	0.552574		0.251556	0.304381		0.264864	0.894023	1.41007	0.704374		0.607568	1.01027	-0.0928827		-0.64806	-0.341773
423	H59260*25E9	cell division cycle 25A CDC25A	Hs.1634	-1.82417	0.0675211	-1.01813	-1.10994	-0.685122	-1.04528	0.0430949	1.04932	-1.1805	-0.450947	-0.435918				-1.31266	-0.190996	-0.348702	-2.14678	-0.43571		0.278752	0.518459	-0.980444	-0.552228	-1.1051	-0.0910271	-0.976231	-0.584025	-0.711724	-0.279526	0.344843		-0.506447	-0.616172	-0.68982	0.235757	-0.364163	-0.287394	0.0561202		-2.69266	-0.889377		-1.30831	-0.057175	0.820841
424	AA452541*26E1	lysosomal apyrase-like 1 LYSAL1	Hs.201377	-0.602408	-0.779552	-0.371491	-0.511941	-0.861039	-0.347702	-0.494121	-0.670481	0.366227	-0.157991		-0.0217802	0.0457355	0.365444	-0.0246303	1.0036	0.0293489	0.649341	-0.738262	0.361574	0.111709	-0.612216	0.571189	-0.531913	0.548019	-0.524287	-0.286559	-0.484728	-0.310185	-0.426263	-0.875392		0.403984	0.732739	-0.172704	-0.278274	-0.35181	-0.459498	-1.02696	-0.270374	0.33741	-0.859971	-0.0667644	0.125396	-0.127197	0.0955813
425	AA102035*26E5	ESTs, Moderately similar to hypothetical protein FLJ20234 AA102035	Hs.300974	0.0787066	0.150336	0.0296456	0.0709836	0.0575732	0.0618797	0.810571	0.281545	0.198156	0.226535		-0.0405831		-0.632505	-0.611633	0.595896	-0.0821762	0.14778	-0.0687459		0.797649	-0.472634	-0.146508	0.28667	-0.336262	-0.16522	0.312348	0.422379	0.613581	0.127288	0.779524		-0.294615	0.00408301		0.120327	-0.174512	0.415539	0.236789	0.254492	0.283427	0.231148	0.0834857	-0.0699019	0.0150061	0.298933
426	AA456439*26E9	MAD, mothers against decapentaplegic homolog 4 (Drosophila) MADH4	Hs.75862	-0.110611	1.11688	-0.599058	0.14782	0.344729	0.572119	0.570475	0.0165291	0.624777	-0.193478	0.307908	0.0719525	0.190807	-0.414838	0.701192	0.466035	0.0910347	0.291389	-0.724227	0.0353768	-0.316045	0.59887	0.448004	-0.18254	0.591948	-0.0785103	-0.275975	0.384926	-0.311206	0.19271	-0.0520942	-0.314947	-0.26051	0.26456	-0.519681	-0.0826034	0.122207	-0.181957	-0.745697	-0.779125	-0.299242	-0.285634	0.190273	0.394078	-0.458631	0.175605
427	AA487191*27E1	myosin regulatory light chain interacting protein MIR	Hs.20072	0.385413	0.209977	-1.37096	-0.185097	-1.02476	-1.12866	1.55773	-0.666932	1.72462	0.461031	1.90714	1.12274		1.72003	1.24072	0.603651	1.05012	1.22703	0.38442	1.47501	1.78257	1.15517	0.581254	-0.836474	1.56223	-0.567391	1.97313	2.10843	1.42921	0.626396	0.502759		0.185916	1.22826	1.43948	-0.994053	0.643677	0.450317	1.04991	-0.0913432	-0.351817	0.435911	1.04797	0.321088	-0.981957	0.673521
428	T87139*27E5	ESTs, Weakly similar to no similarities to reported gene products [H.sapiens]	Hs.300657	-0.220334	-0.170549	0.0391416	-0.548405	-0.300665	-0.649029	-0.364794	0.596157		-0.227558	0.500282	0.598067			0.0056286	-0.00722245	0.125523	0.160661	0.00689362		0.350164	0.290247	0.249236	0.302455	0.809161	-0.875366	0.209369	0.671396	0.298692	0.0190796	0.182901		0.243556	0.23772	-0.347723	0.112675	0.0052853	0.295091	-0.181469	-0.324358	0.170758	-0.112066	-0.432458	0.59509	0.201159
429	H53291*27E9	H53291	Hs.268892	0.273943	0.359859	1.00511	0.72805	0.658804		0.097441	1.15245		-0.0468404	0.423907	2.59283			0.421866	0.283083	0.268574	0.488447	0.642526		1.31625		0.00873815	1.97197	1.512				0.72983				0.988004	0.41614						-0.0357066	0.758116	1.46892
430	N79037*28E1	hypothetical protein MGC4276 similar to CG8198 MGC4276	Hs.177776	0.124211	0.90037	-0.112948	-0.340681	-0.141399	-0.569946	0.301521	1.36836	0.51076	-0.590187	-0.866339	-0.530566	0.427083	-1.71435	0.463453	0.133045	-0.103072	0.0465979	-0.583332	-0.686997	-0.463397	-0.305661	0.2801	-0.395998	-0.333191	0.0142823	-0.842521	0.0364324	0.412108	0.350406	-0.257535	-0.361272	-0.242519	-0.0368364	-0.108002	0.193274	-1.02454	-0.14856	-0.577689	-0.331042	-0.696247	-0.150572	0.36301	0.608547	-1.12807	-0.123407
431	R94693*28E5	LIS1-interacting protein NUDEL; endooligopeptidase A NUDEL	Hs.3850	0.0611481	-1.49885	-0.23248	0.222564	0.0423094	-0.0600056	0.0799608	-0.633231	0.46991	0.143795	0.259909	0.282854	-0.179935	-0.360875	0.307518	-0.0252129	0.157641	0.762829	-0.27605	0.548578	0.776174	-0.0381168	1.0394	0.516449	0.171138	-0.374726	-0.0543013	-0.13923	0.0890631	-0.884347	-0.35198	0.174811	-0.00952987	-0.0860126	0.00516116	0.451554	0.851342	-0.407735	-0.419885	0.299004	-0.192588	-0.398135	-0.457941	0.849729	0.277388	0.210587
432	R22316*28E9	KIAA1320 protein KIAA1320	Hs.117414	0.956291	1.28307	0.314397	0.197353	-0.333374	-0.608751	0.455937	0.445884		-0.0932754	0.0585127	0.659498	-0.32504	-0.834314	-0.439832	0.462611	0.0530267	0.251686	-0.095019	0.408264	0.0264132		0.310399	-0.03415	0.346048	-0.608222	0.176413	0.847222	-0.819638	0.452319	-0.282695	-0.269555	0.315295	-0.0149812	0.18221	0.301478	0.169008	-0.0197145	-0.23771	-0.0727729	-0.209021	-0.310717	-0.0238645	0.547449	-0.590572	-0.128725
433	H52361*29E1	H52361					-1.04716		-0.746721	-1.2669	-1.96222		-1.16854	-1.58598						-0.000788569												-1.88007					-0.429091			-1.4006		-1.49922					-0.965256		-0.414768
434	N52958*29E5	lymphocyte cytosolic protein 2 (SH2 domain containing leukocyte protein of 76kDa) LCP2	Hs.260872	0.924394	0.812563	1.77806	1.43449	1.53	1.7229	0.568738	0.738333		0.487834	0.731022	1.4246		3.17546	1.98313		0.00969378	-0.301547	0.667847		0.874466	1.5926	1.12505		1.25956	1.13958	1.66237	2.1103	1.56347	0.75915	0.502918		0.746926	0.278524			1.42495	1.97107	1.83243	1.67159	1.97824	1.1487	1.71311	1.14826	2.08156	2.2348
435	AA031284*29E9	src homology three (SH3) and cysteine rich domain	Hs.56045	0.171388	0.432562	-0.23185	0.256897	0.405141	-0.331479	-0.061923	-0.0790899		-0.0221637	-0.27424	0.501786			-0.129543		0.135884	0.161607	0.141177		0.248108		-0.314856		0.861323		2.98876		0.341999	0.924916	-0.0100184		0.131305					0.2906	0.67058		-0.0163825					0.876885
436	R95887*30E1	ATPase, Class VI, type 11B ATP11B	Hs.75478		-0.295162			-0.046179		0.214959	0.274745	0.86794	0.532755	0.208903	0.492872	0.677479	0.0787888	-0.277483		-0.0135177	0.705518	-0.380073		0.108721	0.890544	0.325328		0.235516	0.767355	0.496233	1.18602	1.01077		0.0603497		0.0124847	0.0402611			0.64653	0.0848957	-0.206649	-0.00125611	0.791143	0.843799		0.461851	0.227471	0.852755
437	T95504*30E5	vanin 3 VNN3	Hs.183656	-0.547709	-1.34927	-1.15164	-0.876494	-0.401186	-1.01412	-1.9954	-0.373754	-2.37674	-2.27732	-2.12213	-1.81771	-1.89491	-1.75408	-1.85666	-1.35323	-1.40007	-2.43409	-0.848377	-2.0282	-2.42006	-1.52071	-1.95769	-1.18619	-2.08534	-1.14822	-1.98385	-1.65287	-1.61588	-1.81536	-1.76436	-1.55514	-1.57841	-1.66626		-1.54469	-0.711517	-0.455071	-1.14955	-1.21371	-1.00246	-1.39799	-1.33038	-1.71221	-0.439203	-1.36518
438	H53620*30E9	Homo sapiens, Similar to DKFZP564M2423 protein, clone MGC:684, mRNA, complete cds	Hs.324067	-0.702054	-0.348005	-0.471005	-0.608733	0.040434	-1.0949	-0.530242	0.132309	-0.463244	-0.234398	-0.236961	-0.0900008	-0.163997	-0.752676	-0.114213	-0.1421	-0.349145	-0.641497	-0.672295	-0.372261	-0.0468841	-0.471273	0.0418041	-0.0306316	-0.414287	-0.126359	-0.435615	0.000223444	-0.396932	0.244256	0.0585027	-0.188344	-0.209423	-0.354845	-0.492822	-0.0829757	0.0189445	-0.865908	-0.786045	-0.919184	-0.763058	-0.040572	-0.393846	-0.506597	-0.147171	-0.554209
439	T99192*31E1	T99192		-0.44472	-0.0572018	0.0830472	-0.323791	-0.276572	-1.10386	-0.560055	0.327602		-0.426214	0.130127	0.271512			-0.670292	0.698759	-0.244495	0.900844	-0.313065		0.129439	-0.0945113	-0.148164		0.0868353		-0.578474			-0.263271	-1.09803		0.124692				-0.453314	-0.0403792	-0.991751			0.0307007		-0.301993		0.57108
440	R78586 | R78585*31E5	calumenin CALU	Hs.7753	-0.615142	-1.59967	-1.53271	-1.12596	-0.513953	-1.2964	-2.20134	-0.187201	-2.55046	-2.64549	-2.74142	-2.22989	-2.63946	-3.2236	-2.46694	-1.79162	-2.05245	-2.61616	-1.15535	-2.62022	-2.56206	-1.78394	-2.32954	-1.52644	-2.46326	-1.38173	-2.33895	-1.77899	-1.76203	-2.52477	-2.02206	-1.96661	-2.00657	-1.89909	-1.94627	-1.76579	-0.993438	-0.960878	-1.41897	-1.74434	-1.25552	-1.83468	-1.64716	-1.91563	-0.452143	-1.42436
441	N93392*31E9	CATX-8 protein	Hs.150826	1.45167	0.807993	0.499853	1.67453	0.964354	-0.00307354	2.99646	0.326258	2.33838	2.42199	2.35849	1.84507	2.38676	1.88867		1.34452	0.926576	2.04832	1.40873	2.80675	2.25907	1.67257	1.94648	1.34007	2.08385	1.62673	2.93559	1.27246	2.25796	1.99796	2.86714	1.39744	2.14365	1.77537	1.16012	0.311052	2.38496	1.0319	1.00938	0.995554	0.119517	1.83895	2.1954	1.80919	1.12573	2.34746
442	AA027950*32E1	ESTs	Hs.61459		0.150625		-0.518842	-0.653165		1.07278		0.0753434	0.48641	0.543593	-0.241673	0.485471	0.410076	0.805374			-0.140024	-0.602522		0.486453		0.141123		0.479771	0.0918838	0.597347	0.651046	0.133396	-0.391474	0.893251			-0.0159452			0.73352		-0.195805		-0.590562	0.369631	0.333007	0.641418	0.134814	0.279058
443	R73539*32E5	formin 2 FMN2	Hs.24889	-2.46487	-1.8387	-0.839165	-1.09258	-1.89678	-0.901832	-0.952148	-0.940375	-1.40135	-1.3284	-1.69965	-1.00519			-0.728109	-1.35255	-0.179682	-1.77363	-0.960272		-1.6554	-1.66476	-0.943292		-1.04931	-0.680495	-1.23267	-1.44245	-1.65255	-0.442639	-1.5941		-0.921071	-1.60163			-0.952181	-1.49901	-1.2197			-1.06001	-1.13195	-1.73755	-0.792157	-1.25458
444	T63321*32E9	hexosaminidase B (beta polypeptide)	Hs.51043	-0.590827	-0.306218	-0.149652	-0.126939	-0.316205	0.106558	0.117925	-0.203291	0.0806076	-0.0254884	-0.0899222	-0.102577		0.293028			0.0438438	-0.27451	-0.299637		0.012113	-0.183457			-0.152857	0.698143	-0.607954	-0.325628	-0.518567	0.222695	-0.0587798		-0.288146	-0.00359758	-0.731944	-0.723583	0.726711	-0.0286844	-0.11364		-0.589114	-0.523844	-0.364148	-0.0325611	-0.514535	-0.611779
445	N30706*55E1	neuralized-like (Drosophila) NEURL	Hs.172700		0.253103	0.602212	0.0984161	0.0416342	-0.23024	-0.286814	-0.247113	0.518535	-0.237792	0.0291285	-0.00971506	-0.227804	-0.186931	0.174234	0.149983	0.387974	0.524449	0.238874		0.0583331		-0.681062	0.0565195	0.246512	-0.155516	-0.653889	-0.429713	-0.476508	-0.474052	-0.183238		0.0905955	0.401594			0.351651	0.32854	-0.382317		0.265508	-0.119042	-0.765117	-0.556584	-0.0210144	0.0628643
446	AA004671*55E5	GK001 protein GK001	Hs.8207	-0.189083	-0.128084	0.48174	0.0353836	0.413459	-1.09482	0.309348	0.30048	0.415471	-0.144463	0.185277	-0.0999128	-0.871833		-0.200267	-0.631333	0.0749476	0.13876	0.518167		-0.0541966	-0.791619	-0.436525	0.221255	0.195806	-0.0193942	-0.482089	-0.339016	-0.147663	0.708825	-0.29888	0.271541	0.0620245	0.669406		-0.753261	0.249858		-0.159762		-0.692577	-0.130675	-1.18636	-0.784661	0.0103172	0.084288
447	AA431199*55E9	uncharacterized hematopoietic stem/progenitor cells protein MDS029 MDS029	Hs.43549	-0.53804	1.06894	0.373771	0.147462	-0.188884	0.762759	-0.40024	-0.347417	-0.530705	-0.56694	-0.0329462	-0.0373015	-0.172721	-0.545394	-0.0130084	0.0836939	0.0226465	-0.332178	0.420887	-0.147128	-0.0331019	-0.594019	-0.287927	-0.174715	-0.183463	-0.889347	-0.0466693	-0.659763	-0.271593	0.389274	0.0646426	-0.134345	0.0809677	0.116724	-0.207226	0.322525	0.793836	-0.357481	-0.161754	0.322146	-0.07632	0.123266	-0.210328	-0.5191	0.170103	-0.0350321
448	AA150741*56E1	gene with multiple splice variants near HD locus on 4p16.2	Hs.325987	0.558591	0.417241	0.383616	-0.206369	-0.240186	-0.640193	-0.28438	-0.257717		-0.00139427	0.565712	0.30181	-0.231995		-0.257061	0.101631	0.0775979	0.671603	0.161804	0.285966	0.061035	0.352373	-0.477306	-0.197171	0.303718	-0.192966	-0.492382	-0.703127	-0.447108	0.146362	0.0827559		0.142379	0.438118	0.630204	-0.247506	0.137259	0.233161	0.164233		-0.145001	0.153256	-0.886991	-0.975556	0.333245	0.506442
449	N73611*56E5	transcription factor Dp-1 TFDP1	Hs.279576	-1.17807	-0.685518	-0.0229765	-1.05032	-0.973332		-1.52917	-0.397746	-2.06742	-1.24654	-1.06836	-0.739533	-1.65777	-1.7699	-1.42299	-1.90589	-0.4209	-1.14961	-0.388309	-0.624011	-0.921866	-0.00357639	-0.842069	-0.987991	-0.870191	-1.018	-2.15495	-1.70461	-1.01613	-1.1001	-0.461329		-0.754937	-0.830461	-0.798292	-0.631999	-0.908705	-0.448396	0.436093	-0.610495	-1.28758	-0.645966	-1.34094	-1.38774	0.231475	-0.254144
450	AA151930*56E9	proteasome (prosome, macropain) 26S subunit, non-ATPase, 11 PSMD11	Hs.443379	0.00545749	-0.164917	0.171071	-0.179569	-0.470804		-0.601995	-0.481946		-0.134987	0.381347	0.647969			0.00452995	0.123539		0.456086	0.117622	0.329106	0.11234		-0.510493	0.0674789	0.479172	0.146405	-1.0684	-0.347219	-0.301394	-0.180808	0.373714	-0.179385	0.200602	0.414371		-0.136534	0.421977	0.316538	0.157728	-0.186761	0.408502	0.609785			-0.0450926	0.159211
451	AA047443*57E1	LIM domain containing preferred translocation partner in lipoma LPP	Hs.180398		1.01842	0.490843	1.03702	-0.0685372	0.195554	0.88746	0.227055	0.542152	1.27797	1.21865	0.879426	0.505887	1.36826	1.12385	0.88165	0.231384	1.60077	1.34027	1.36891	1.52972	1.69493	0.0992769	0.480421	1.59734	1.7148	1.69633	0.712728	1.20088	0.921336	1.42758	0.77409	1.2498	1.75418	0.359145	0.260577	1.0211	0.291191	1.1451		0.394514	0.59884	1.11788	1.07613	0.306126	1.38417
452	W44518*57E5	wingless-type MMTV integration site family, member 5B WNT5B	Hs.306051	0.749346	-1.46244	-0.881856	0.056596	-0.557486	0.169261	-1.50665	-1.77004	-0.288852	-1.23333	-0.922355	0.84683	-0.952716	-0.890819	-0.151445		1.67349	-0.656689	-0.605534	-0.0390638	-1.45094	-0.494247	-0.702101	-0.710309	-0.984953	-0.649304	-1.88692	-2.23592	-1.78908	0.38101	-0.884674		0.000731373	-0.894995	-0.912332	-0.035053	-0.227377	-0.204152	-0.368568			-1.48128	-1.16977	-0.0373867	-0.809522	-0.97579
453	W84524*57E9	transmembrane 4 superfamily member 5 TM4SF5	Hs.184194	-1.69691	-1.1529	-0.737181	-1.05395	-1.42524	-1.1924	-0.585841	-0.680362	-1.05133	-1.10323	-0.894614	-1.06466	-1.27133	-1.73654	-0.758532	-0.366813	-0.0938068	-0.934999	-0.606632		-1.09357	-1.32811		-0.903114	-1.24274	-1.05081	-1.13336	-2.67874	-1.20914	-1.18025	-0.684451		-0.312292	-0.825281	-1.71165	-0.983316	-1.345	-0.922924	-1.36226	-1.12966	-1.26733	-0.709758	-2.6232	-1.56253	-0.798059	-0.758733
454	AA043494*58E1	CCAAT/enhancer binding protein (C/EBP), delta CEBPD	Hs.76722	0.712324	-0.183869	0.23825	0.157384	0.216868	-0.623587	0.317573	-0.446556	-0.34135	0.0247964	-0.290383	-0.363746	-0.114226	-0.73214	0.178842		-0.125919	-0.0809566			0.0753023	-0.200631	-0.567047	0.0525765	0.12803	0.285582	0.613344	-0.34514	-0.145187	0.45429	0.495674		0.98293	-0.358809	-0.959366		0.225578	-0.108	0.291211		-0.544757	0.247171	0.033276	-0.272352	-0.0170884	-0.0307502
455	AA431433*58E5	ATP synthase, H+ transporting, mitochondrial F0 complex, subunit e ATP5I	Hs.85539	-0.804182	0.401422	0.526041	0.887582	-0.895378	1.48149	0.669924	-0.173663	-0.277242	0.0996947	0.566442	-0.225205	0.345244	0.163572	1.01789	0.237436	0.322905	0.0986186	0.385138	-0.0875611	0.195507	0.492002	0.203551	-0.170165	0.737783	1.09636	0.0387028	-0.434816	1.77642	1.16189	0.474323	0.452055	0.283454	0.5864	0.397074	0.609533	0.410016	0.437758	-0.160664	-0.356172	-0.427158	0.0723198	0.274542	0.572729	0.186511	0.390838
456	AA609880*58E9	solute carrier family 4, anion exchanger, member 3 SLC4A3	Hs.1176	1.16915	0.233507	1.02948	0.13463	0.432277	1.30135	0.364794	0.0818556		0.595195	0.57775	0.102971	1.96869	1.91461	1.33022		0.293116	0.107011	-0.0977584		0.148628	1.10724	0.260253	0.415972	1.4325	1.58692	1.00726	0.692319	0.885603	1.15928	0.714048			0.56552	0.0701165	0.700838	0.909038	0.704125	0.0735265	0.423545	1.50413	1.03729	1.66562	1.78287	1.3372	1.69733
457	AA476273*83E1	KIAA0963 protein KIAA0963	Hs.7724	0.373771	0.483283	1.27588	1.09428	1.24535	0.386519	0.716847	1.17697		0.237006	0.312549	0.489148	-0.591981	0.388847	0.472099	0.00509134	-0.0134832	0.638559	0.90072		0.435482	0.459777			0.198572		1.2199		0.8546	0.198386	0.589205		0.904773	0.497847			0.838093	0.822811	0.844363		1.07819	1.30077	0.224331	0.273282	0.493741	0.280472
458	AA448486*83E5	Homo sapiens, clone IMAGE:5225154, mRNA, partial cds AA448486	Hs.169850	0.312395	0.353715	1.03108	0.484977	0.82428	-0.247817	0.512114	0.185242	-0.0791714	0.273052	0.331185	-0.325201	0.777322		0.125265	0.463879	-0.337634	0.546156	0.286739				-0.430788		0.59404	0.808303	1.01316	0.0832956	0.60613	0.545882	0.790711		0.237599	0.122486			1.20157	-0.240582	0.439953		-0.0885755	0.105519	0.274489	0.287439	0.680036	0.120083
459	AA431408*83E9	DKFZP566D193 protein DKFZP566D193	Hs.106909	-0.665434	-0.118129	-0.241275	-0.168487	-0.215828	-0.464307	0.0672398	-0.00511867	-0.589689	-0.672547	-0.669915	-0.334194	0.182273	-0.479245	-0.34888	-0.0862092	0.0675331	-0.15636	-0.416306	-0.657038	0.0187599	-0.236755	-0.58466	-0.41203	-0.208366	-0.604714	-0.445903	-1.2647	0.338591	0.321901	-0.260682	-0.608652	-0.195084	-0.423695	-0.0764328	-0.752617	-0.179642	-0.411397	-0.866831	-0.450019	-0.27019	-0.713615	-0.0867741	-1.09429	-1.06753	0.200796
460	N72878*84E1	KIAA1249 protein	Hs.10669	-0.367179	-0.241044	-0.59735	-0.608585	0.172172	-0.600906	-1.0493	1.12255	-1.53744	-0.785429	-0.617376	-1.06661	-1.45679	-1.61568	-0.909951	-0.640173	-0.732899	-1.18702	-0.508719	-0.901524	-0.201327	-1.0236	-1.00505	-0.25019	-1.13032	-0.426303	-0.639698	-0.536463	-1.0237	-0.711052	-0.270014	0.177886	-1.03973	-0.156698	-1.44952	-0.702567	-0.896791	-0.183649	-0.427642	-0.38737	-0.246629	-0.724866	-1.41448	-0.935171	-1.25025	-0.687868
461	N59335*84E5	neural polypyrimidine tract binding protein	Hs.34956		1.16176	-0.243814	-1.04443	-0.518075	-0.295748	-1.08204	0.455722	-1.01624	-1.02121	-0.799354	-0.480032	-0.244591	0.209757	-0.449634	-0.10394	0.0328008	-0.614335	-0.727521	-0.582131	-1.09851	-0.351967	-0.583026	-0.415959	-0.160801	-0.0943484	-0.712592	0.228581	-0.7917	-0.865725	-1.11203		-0.352592	-0.177384	-2.65896	-1.04295	-0.547227	-0.403663	-1.15432	-0.672914	-0.0391659	-0.340372	-0.0924895	-0.341841	0.200025	0.41138
462	N39542*84E9	ESTs,similar to hypothetical protein FLJ20489 N39542	Hs.332635	-0.271792	-0.213449	0.0865187	-0.521071		-0.5601	-0.50922	-0.229956	-0.575795	-0.205327		0.0490093	-0.858775	0.635466	0.246881	0.557692	0.0764987	0.468824	-0.401086	-0.207261	-0.468802	0.281927	-0.488356	0.0764211	0.0793801	-0.370784	-1.26907	0.140122	-1.112	0.388111	-0.275225	-0.0543056	-0.0597223	0.521544			0.0140398	-0.299911	-0.58007		-0.269568	-0.445083	-1.51219	-0.968121	-0.107439	0.108716
463	H79319*85E1	ESTs, Highly similar to Y136_HUMAN HYPOTHETICAL PROTEIN KIAA0136 H79319	Hs.268997	0.378916	0.559343	0.905793	0.0830356	0.418172	-0.309687	0.607722	-0.0236288	0.480973	0.25953	0.468655	0.243457	-0.00257405		0.352119	0.113127	1.21638	0.800329	0.340883	0.174899	0.633767	0.707941	0.370597	0.431485	0.156381	-0.299397	-0.176743	0.830968	-0.249955	0.602656	-0.0297761	0.73173	0.770991	0.646843		-0.0895045	0.460296	0.454843	0.214791		0.152674	-0.0824023	-0.116679	0.169467	-0.0824567	0.524846
464	N52482*85E5	ESTs N52482	Hs.108479	0.699093	0.346981	0.764074	-0.201316	0.172632	-0.270024	0.253882	-0.392673	0.102726	0.120586	0.0189485	-0.355395	-0.266722	1.0675		0.198926	-0.087314		0.349403	0.0418624	-0.0739861	0.376016	-0.634911	-0.345456	0.0942782	0.150335	-0.546384	0.0668709	-0.389113	0.256435	0.317633	0.305629	0.0772525	0.292699	-0.0406444	-0.824666	0.675668	0.0990558	-0.254174		-0.391622	0.00991587	-0.663176	0.243646	-0.151059	0.4519
465	H81907*85E9	ankylosis, progressive homolog (mouse) ANKH	Hs.168640	0.23948	-1.59912	-1.20534	-1.35224	-1.22844	-0.983158	-2.71102	-1.57837	-1.47675	-0.93585	-2.22644	-2.23113	-2.16362	-2.24081	-2.44843	-1.51375	0.430628	-1.31941	-1.50527	-1.97165	-2.9244	-2.41771	-1.58227	-0.817189	-2.24586	-2.67494	-1.9882	-1.20245	-3.16202	-1.39448	-1.76638	-2.47013	-0.654369	-1.80635	-1.44703	-1.20047	-2.26208	-1.93657	-2.14677	-1.13631	-0.377507	-1.85223	-3.35797	-2.05976	-2.23137	-2.3395
466	AA496283*86E1	Thy-1 cell surface antigen THY1	Hs.125359	1.1383	0.16327	-0.00484538	1.20733	0.202801	0.0459905	-0.243523	-1.34046	-1.73395	-0.53138	-1.50295	-2.07474	-1.51329	-0.568032	-1.12936	-1.01102	-0.837381	-1.69515	0.616995	-0.244524	-0.782304	-1.10468	-0.967351	-0.996047	-1.51805	0.0339932	-1.53791	-1.96559	-1.4698	-0.315798	0.0156233	-0.889051	-1.42805	-0.372557	-0.784033	0.640234	-0.146041	0.456846	0.3974	-0.16046	-0.0931329	-0.271434	-0.667862	-1.18547	-0.663788	-0.595066
467	AA629692*86E5	CD3D antigen, delta polypeptide CD3D	Hs.1600	-0.802392	-0.49328	-0.912742	-0.603193	-0.289753	-0.890278	-0.857059	-0.388085	-1.37471	-0.224763	-0.897852	-1.259	-1.41552	-1.40397	-1.66007	-1.42746	-0.712142	-1.38212	-0.600594	-1.28889	-0.505995	-1.15571	-0.651016	-0.430818	-0.795619	-0.281076	-1.23707	-0.312201	-1.01045	-0.449695	-0.907216	-0.484033	-0.965578	-0.713685	-1.13268	-0.207405	-0.43856	-0.665326	-0.726212	-0.913639	-0.216368	-0.481459	-0.918142	-0.909478	0.0905666	-0.916016
468	AA699560*86E9	surfeit 1 SURF1	Hs.3196	-0.16854	0.491373	0.092576	0.144097	0.275612	-0.381358	0.962528	0.712361		-0.275518	-0.327215	-0.368726	0.253447	-0.389716	0.200349		0.111243	0.487388	-0.0167859	0.0647024	-0.165119			-0.288281	-0.53126	0.366191	-0.0507644	-0.285244	-0.0329915	0.759058	-0.12631	0.67813	-0.29733	-0.704642		-0.235447	0.184427	-0.290221	0.109907		-0.118857	0.106955	-0.0519652	-0.0426174	0.125391	-0.202095
469	H60824*87E1	protein kinase C, theta PRKCQ	Hs.211593	0.25572	-0.178031	0.246571	-0.158406	0.310712	0.255396	0.0666115	-0.401593		0.205359	0.348337	0.91185	1.52579		-0.0317437	0.824018	0.844326	-0.312629	-0.0941704	0.610367	-0.324058	0.373069			0.363685	1.0469	-0.430174	-0.725883	-0.654791				0.192321	0.153488			0.24908	0.697665	0.797707		0.853208	0.0724725	0.369221	0.802931	-0.0538493	0.0523765
470	AA443908*87E5	ubiquitin specific protease 8 USP8	Hs.152818	-1.01342	-0.822683	-0.23805	-0.515418		-0.195438	-0.774522	-0.769727		-0.462107	-0.438533	-0.225687	-0.235882	-0.999495	-0.190265	-0.178133	0.230347	-0.313565	-0.236073	-0.16719	-0.475336	0.184433	-0.389985	-0.490637	-0.139739	0.224865	-1.10728	-0.838277	-0.746179	-0.293094	-0.491828	0.25603	-0.0420253	0.275081		-0.362788	0.375627	-0.0408934	-0.322417		-0.20732	-0.482073	-0.393202	-0.657301	-1.33736	-0.439658
471	H99681*87E9	DNA segment, single copy probe LNS-CAI/LNS-CAII (deleted in polyposis	Hs.178112	-0.472221	0.214817	0.277436	0.828943	1.09734	-0.289253	0.697249	0.374412	0.993202	0.622717	0.598579	0.512474	0.74466	0.352472	0.981313	0.815316	0.444961	0.879217	0.538048	1.09	1.29312	0.774094	0.580713	0.333863	0.629059	0.625467	0.629456	0.249017	0.985392	0.867119	0.614566	0.877337	0.765505	0.472397	0.749371	0.368018	1.73949	0.189066	0.0478233	0.196121	0.547901	-0.341704	0.214592	0.605774	0.739975	0.501292
472	AA424695*88E1	integrin, alpha 3 (antigen CD49C, alpha 3 subunit of VLA-3 receptor) ITGA3	Hs.265829	-0.597305	-1.16389	1.27298	-1.02843	1.51083	-0.0656732	0.360745	2.4266	0.453569	1.15108	0.0491622	0.454476	0.911838	0.489575	0.356213	1.34559	0.0630401	1.73904	0.897929	1.71525	1.20159	1.09765	1.0365	2.54406	0.0514193	-0.0469009	0.923777	-0.0343873	0.894113	0.181336	0.80659	-0.229478	1.93442	0.68541	1.9782	0.77597	0.636479	-0.502356	-0.930556	0.313003	0.389536	-0.859799	-0.113329	-0.0905175	1.56955	0.0999206
473	AA460841*88E5	insulin receptor substrate 1 IRS1	Hs.96063	0.096558		0.246894	0.160302	0.342334	0.44157	0.242213	0.992572	0.89395	0.985585	0.383196	0.72034	0.69682	0.791994		1.29875	0.23091	1.01845	0.552781	1.06251	0.95729	0.640335	0.561423		0.378426		0.580288	-0.00808085	0.479359	0.337253	0.98998		0.619705	0.330088	0.53683	0.580079	0.613481	0.228417	0.204798		0.173543	0.0898328	0.216071	0.810512	0.486728	0.705374
474	AA018683*88E9	ISL1 transcription factor, LIM/homeodomain, (islet-1) ISL1	Hs.505	0.721318			0.400256	0.628353	0.747961	0.271853	1.77033				0.37251	2.04958	3.64606	1.384		-0.167161						0.233679		1.33024		1.01871	3.58651	1.18569													0.804553	1.63373	1.11244	1.58982	0.810082
475	AA400476*89E1	kinesin family member 2C KIF2C	Hs.69360	-1.23817	0.236448	-1.28192	-1.19147	-0.14857	-0.725208	-0.732949	-0.315751	-2.35753	-1.21551	-0.981575	-1.33874	-1.838	-1.2994	-2.03862			-3.14746	-0.965109	-1.45309	-1.26698	-0.0245474	-0.828017	-0.913353	-0.593755	-0.00527158	-1.38151	-0.0540381	-1.04169	-0.990976	-0.313633		-1.35541	-0.929129	-1.14228		-1.06137	-0.832896	-0.257717	-1.46555	-1.75642	-0.303841	-0.661376	-1.0488	0.475375	-0.0224363
476	T56281*89E5	RNA helicase-related protein	Hs.8765	0.633325	1.14695	0.854582	1.63148	1.99036	1.91134	-0.46811	0.369954		-0.659831		-0.169196	1.15198	1.70116	0.528934		-0.0724199				-0.471245		-0.2175		0.546393	0.620135	0.857085	1.40519	0.574959	-0.0291401			-0.0854717					1.05659	0.849031		1.13012	1.66726	1.22382	-0.394707	1.72179	0.927869
477	H22922*89E9	manic fringe homolog (Drosophila) MFNG	Hs.31939	-1.47486	-1.32735	-0.920284	-0.893931	-1.11737	-0.955137	-1.43282	-2.28195	-2.45781	-2.53682	-2.6668	-2.12849	-1.01101	-1.22636	-0.524135	0.0157558	-0.161519	-1.98222	-1.74375		-2.7923		-0.712306		-1.71056	-1.06232	-1.31331	-1.82141	-1.31785	-1.78793	-1.70691		-2.11042	-2.018			-1.78869	-1.83365	-0.44332		-0.426139	-1.54268	-0.912642	-1.86341	-0.0148357	-2.00369
478	AA180013*90E1	hyaluronan-binding protein 1	Hs.241363				0.819476			-0.185308	0.275972	0.828172		0.532166							0.927497			1.2746				1.64256		1.9833		1.8771	1.33775	1.35978			0.724132					0.515343
479	AA485371*90E5	bone marrow stromal cell antigen 2 BST2	Hs.118110	0.0897048	-1.68163	0.0924619	0.368973	2.26317	1.31635	-0.110387	1.4667	-1.03357	-1.7986	1.75983	1.90304	2.8406	1.55588	-0.330348		-0.430538	1.79932	1.84954	1.31679	-0.604883	2.04291	0.377521	1.30697	-1.45295	1.71943	3.07509	1.20053	0.763478	-1.52314	-0.0723134		1.94175	-1.03799	0.770085	2.36574	2.16905	2.80735	2.60323	1.47438	2.0408	2.66778	1.82654	2.62875	2.5636	2.29374
480	H99588*90E9	lymphoid nuclear protein related to AF4 LAF4	Hs.38070	-0.872966	-0.842844	-0.526929	-0.697297	-0.672937	0.0593707	-0.824444	-0.531192	-0.947115	-1.10252	-0.186829	-0.108228	0.613891		-0.0843192		-0.255878	-0.273053		-0.300668	-0.773781		-0.406894		-0.240318	-0.345522	-0.162101	-0.844032	-0.359157	-0.826977	-0.445571	0.029365		-0.984102			-0.0390141	0.218416	0.525036		-0.0502832	0.0211386	0.558091	-0.186627	-0.0629169
481	N57553*91E1	adenosine A2a receptor ADORA2A	Hs.1613	0.208715		-0.106626	0.109447	0.738945	0.210087	2.27028	-0.173886	1.80384	1.74765	1.64673	0.900484	3.28169	1.73328	3.68766	2.55475	0.215558	1.99395	2.4436	2.21409	2.05443	1.93267	2.36271		2.13036	1.43949	2.69914	2.3106	3.11378	2.14652	2.50413	2.40865	1.46234	1.3298	1.45585		3.01466	0.531845	2.03417	1.24414	0.383784	0.0761972	3.02956	2.89857	1.32619	2.8791
482	AA426341*91E5	von Hippel-Lindau binding protein 1 VBP1	Hs.198307	0.546099	0.565818	-0.265323	-1.07346	-0.597902	0.133568	-0.539472	-0.295156	-0.532686	-0.140451	-0.369805	-0.801876	-0.0568513	-0.720331	-0.716322	-0.0931201	0.301767	-0.56982	-0.799519	-0.613252	0.169645	-0.101677	0.0380114	-0.517818	-0.136688	-0.261558	-0.280804	-0.146129	-0.197678	-0.204978	-0.542155	-0.0419193	-0.534098	-0.379169	-0.538399	-0.361245	-0.00606087	0.211331	-0.75978		-0.529333	-0.373914	0.0781662	-0.0571691	-0.165971
483	AA134814*91E9	TRAF family member-associated NFKB activator TANK	Hs.146847	-0.529163	-0.249741	-0.422487	0.135245	0.411043	0.32174	-0.479564	-0.0147516	0.20248	-0.18155	-0.377775	0.448246	0.417842	-0.565275	-0.339398		-0.17486	0.38039	-0.371432	0.0904016	-0.886235	-0.0402645	0.0624862	0.449389	0.0668039	-0.00396582	-0.85452	-0.808663	1.77944	-0.0522678	-0.570472	-0.195681	0.441165	-0.500352	-0.0282709	-0.134815	0.249555	0.122072	-0.202923	0.323526	0.576315	0.345461	0.0712733	-0.0190682	-0.0321851	-0.559416
484	AA406064*92E1	variable charge, Y chromosome VCY	Hs.170076	0.230176	0.618379	0.0425855	-0.237096	0.34161	0.136352	0.738937	0.234842	-0.219381	0.536202	-0.0258277	-0.608887	-0.290561	-0.103515	-0.0586979		-0.540825	-0.158812	0.0896005	0.235067	0.0680776	-0.258593			-0.526975	0.185271	-0.136944	-0.47336	0.103804	-0.0867828			0.0108773	0.104862	0.541431		-0.384298	0.265603	0.213489	-0.0678377	-0.0941061	0.0978574	-0.167848	-0.350375	-0.0288305	-0.50679
485	N63567*92E5	pyruvate dehydrogenase kinase, isoenzyme 3 PDK3	Hs.444422	0.134699	-0.0928153	0.411857	-0.556729	-0.701779	0.76705	0.243907			0.308125	1.1799	0.0480889	0.257232	0.657134	0.611618	0.145637	-0.215361	0.334076	-0.271093	0.0429038	0.476704			-0.183579	0.589081	0.326224	0.584534	0.754505	0.657418	1.275	0.182926	0.0698888	-0.369398	0.346711	0.0463672	-0.0404795	-0.75333	0.137956	-0.0693271	-0.337689	0.40748	0.344322	0.489718	-0.486879	-0.221017	-0.104169
486	N90783*92E9	purinergic receptor (family A group 5)	Hs.189999	0.796275	-0.0803125	1.53848	1.17836	1.20077	1.82209	-0.473974	0.298144	0.86294	1.85561	2.0288	1.37772	3.36259	2.17123	1.58941	1.57752	0.735305	1.8945	1.93289	0.72795	1.65064	0.205808	0.612042	1.7708	1.94961	0.451112	1.11392	0.631743	0.864534	1.63941	1.01117	1.60131	3.95861	0.781686		2.63234	0.761216	1.77455	0.802141	2.54122	2.49101	1.82643	1.28631	0.525249	1.07981	1.07851
487	H78349*93E1	Homo sapiens clone FBA1 Cri-du-chat region mRNA	Hs.102238	0.224475	0.299473	0.333194	-0.0960447		0.401593	-0.01964	-0.288413		0.512656	0.519905	0.465743		1.61876	-0.0451335	0.446832	0.373817	0.346201	0.11509		0.276616	0.493251	-0.502465	0.841331	0.464604	0.490624	-0.099413	0.969734	-0.390364	0.64328			0.432749	0.538394		0.234581	1.07574	0.742732	0.150505		0.838424	-0.127501	0.46223	-0.399111	0.715169	1.24893
488	R41996*93E5	Homo sapiens clone 23798 and 23825 mRNA sequence R41996	Hs.167036	-0.366692	-0.268624	1.32325	2.03713	0.296833	1.16561	0.499327			0.0457291	-0.146802	-0.255205	-0.737207	0.878087	-0.114441		-0.53746	-0.593287	-0.0995657	-0.358883	0.443983	-0.0973522		1.07083	0.015296	0.414789	0.490483	0.512104	0.137103	0.181493	0.883216		-0.185515	-0.580389		1.74886	-0.256113	1.6605	0.136467	0.3704	0.0848655	1.53109	0.787936	-1.0017	0.325712	-0.0776481
489	AA676234*93E9	chromosome 1 open reading frame 21 C1orf21	Hs.12532						1.83077				1.26228						1.76315	0.307083						0.0891631
490	R48320 | AI732309*94E1	EphB0	Hs.78436	-0.570269	1.06269	0.399084	0.190945	-0.197023	1.60885	-0.236588	-0.355251		0.179639	0.771082	0.29078				0.466796	0.302375	0.311486	-0.132992		0.874904									1.10784				-0.568435			0.745182	0.483368	0.618621
491	AA683219*94E5	human immunodeficiency virus type I enhancer binding protein 2 HIVEP2	Hs.75063	-0.745406	0.0130649	-0.25345	-0.0196967	0.312791	0.657565	0.0625763	-0.222027	0.382774	0.173392	0.0485742	0.0888965		0.186122	0.00977791	0.245825	0.293031	0.322292	-0.400268	-0.736775	0.0114428	-0.00245616	-0.233843			0.544962	0.2693	-0.163048	-0.0812886	0.25366		0.208791	0.201484	0.137671		-0.0352132	0.938232	0.617393	-0.265728			-0.288975	0.096776	0.0491911	0.282551	0.465629
492	AA634028*94E9	major histocompatibility complex, class II, DP alpha 1 HLA-DPA1	Hs.914	2.38922	1.1903	1.69888	3.56355	3.82913	2.38403	3.12402	1.48531	-1.08447	1.85371	0.36451	3.35944		1.77631	0.79208	1.19384	0.149668	0.808776	1.90348		1.08687	0.822354	0.0863494	2.07763	-0.255615	2.49942	1.37601	-0.00750632	1.84641	0.969063	0.622951	1.1868	-0.334193	0.59518	1.83677	3.35281	2.12754	2.59605	4.13634	4.42825	4.93034	0.942968	3.47612	1.19381	1.84032	0.138138
493	lambda DNA*SPADESC1	Data not found lambda DNA							0.940246																																		0.302883
494	AA488721*SPADESC9	Transferin receptor (p90, CD71) TFRC	Hs.529618	-5.38856	-5.1352	-4.64096	-5.3785	-6.24943	-4.30891	-6.40957	-7.4564	-5.72201	-6.04498	-6.37034	-6.43087		-6.61237	-5.17668	-4.92415	-3.61197	-6.96174	-5.79406	-6.48419	-6.95168	-6.1868	-3.90803	-5.73871	-5.50777	-6.9393	-5.83154	-0.690889	-5.3878	-6.68483	-6.13785	-5.91323	-5.51154	-6.68275			-6.87555	-4.93059	-4.88804	-5.15638	-5.0792	-5.59706	-4.92853	-6.78569	-5.48641	-6.6154
495	AA496013*SPADESC17	protein tyrosine phosphatase, non-receptor type 11	Hs.506852	-0.146545	-0.3043	-0.100633	0.00906169	0.217611	-0.133558	-1.63029	1.09518	-1.07236	-1.37815	-0.844087	-0.450504		-1.17437	-0.629434	-0.388713	-1.45805	-0.632541	-0.741227	-1.41978	-1.01326	-1.11536	-0.946776	0.139664	-0.52503	0.139496	-1.1915	-1.14946	-0.952537	-0.460549	0.832697	-0.561639	-0.374867	-0.827564	-1.22542	-0.414865	-0.371609	0.320726	-1.33433	-0.552335	-0.451776	-0.00529658	-0.850845	-0.120104	-0.344647	-0.617659
496	AA862999*SPADESG1	calcium-sensing receptor CASR	Hs.435615	-0.0869665	-1.23442	-0.159269		-1.11711	-0.295631	-1.64811	-1.1867			-2.2263	-1.05514			-0.256114	-0.975196	0.281134	-1.44227	1.49464				-0.37928				-1.27874	-1.11777	-1.68253	1.4227	-0.204765			-1.13136					-0.784686			-1.7902		-0.411431
497	AA040703*SPADESG9	profilin 2 PFN2	Hs.91747	0.96922	-0.932533	0.191549	-0.882723	-0.613557	0.611313	-0.468136	-1.34521	-0.251326	0.0138273	-0.375396	-2.10091		-0.509295	0.0197327	-0.3702	-0.144644	-0.0379394	-0.248992		-2.4512	0.193904	0.596904	-1.49905	-0.940104	-0.637932	-0.468649	-0.808753	-1.69143	-1.86769	-0.326342	-0.63009	-1.87038	-1.06188	0.0072394	-0.412577	-0.75547	-1.14587	-3.43912	-1.64599	-1.75418	-0.379637	-0.00728406	-0.541672	-0.528634	-0.810952
498	R62612*SPADESG17	fibronectin 1 FN1	Hs.287820	-1.07434	-2.65422	-1.6818	0.164227	0.204107	0.065016	-3.33143	0.0663149	-5.26692	-3.27834	-3.61881	-4.76336		-3.3853	-4.18516	-3.12453	-4.19112	-4.9737	-0.131933	-4.45087	-4.65153	-3.78204	-3.54197	-1.64481	-3.13119	-0.831888	-4.9395	-4.59427	-2.99013	-3.16247	-2.822	-2.83872	-2.25641	-3.26728	-3.33225	0.112095	-2.04115	0.240753	-0.709219	-0.361414	-2.77117	-1.48623	-3.99285	-3.48716	-2.61941	-2.56875
499	AA666180*SPADESK1	nuclear receptor subfamily 2, group F, member 6 NR2F6	Hs.466148				-0.102161	0.0172355	0.249005	-0.600635	0.377943	-2.22638	-1.227	-1.6277	-2.10329		0.0137292	-0.473762			-0.672078			-1.83806		-1.18074	-0.560688	0.0653817	0.348534	-0.129259	-0.165662	0.253572	-1.22062				-1.14449	-2.03894		-1.0561	0.351799	-0.364028	-0.136946	-1.20423				-0.217106
500	AA464525*SPADESK9	interleukin 1 receptor, type I IL1R1	Hs.516249	0.851383	-1.30467	0.634627	1.07379	1.16903	1.22349	1.10837		0.889895	-0.206095	0.239493	-0.19666		0.361602	1.22433	0.169532	0.666416	0.368452	1.06655	-0.0624906	-0.847664	0.282783	-0.44823	1.62728	-0.485387	1.21831	0.703959	0.993269	1.28026	-0.0948739	0.779799	1.03737	0.249811	0.262498	-0.0388728	0.609855	0.972316	1.62489	0.874073	2.64001	0.758511	0.829242	2.1436	0.700003	-0.588597	0.0930121
501	AA877595*SPADESK17	breast cancer 1, early onset BRCA1	Hs.194143	0.0255777	-0.247893	0.2538	-0.0724437	0.134667	0.801262	0.0568243	0.844442		-0.393739	-0.55181	-0.149839	0.686901	0.707259		-0.0814956	-0.284796	-0.350134	0.109787	-0.191897	-0.3127	0.0851998	0.00885337		0.805505	0.86827	0.473107	0.546366		0.159882	-0.200314		0.133437	-0.0561575		0.384294	-0.352532	0.041464	0.0867364		0.613686	0.600193	1.11626	0.798423	0.687679	0.793871
502	empty	Data not found empty
503	empty	Data not found empty
504	empty	Data not found empty
505	AA676470*95E1	membrane component, chromosome 17, surface marker 2 (ovarian carcinoma antigen CA125) M17S2	Hs.277721						-0.301421	-0.421018					-0.0576155						0.199231
506	AA625628*95E5	accessory protein BAP31 BCAP31	Hs.291904	-0.29202	-0.266298	0.228208	0.257425	0.327038	0.516527	1.29552	0.470437	1.14256	1.79034	1.08154	0.176998	1.46984	1.96685	1.02936		0.244492	1.16354	1.00908	1.46418	1.83445	1.54009	0.517491	0.391961	1.09759	1.00287	1.95052	0.253556	1.31733	1.75421	1.98471	1.02976	1.07852	1.10472	0.942135	0.464112	0.941834	0.750409	0.595603	0.429922	0.315767	0.984422	0.815723	0.810929	0.798391	0.145969
507	AA071330*95E9	guanine nucleotide binding protein (G protein), alpha inhibiting activity polypeptide 2 GNAI2	Hs.77269	0.0651157		0.189083	0.337871	0.584272	0.194384			0.351334	0.708035	-0.210974	-0.453806	0.379227	0.413145	0.0791306		-0.286761	0.744979		0.92118	0.265328	0.201363	0.027806	0.436298	-0.403331	0.308387	0.0618937	-0.135695	0.186009	0.160475	0.33491		0.303847	-0.468949			0.394877	0.252351	1.05806	0.514612	0.555576	-0.285991	0.824304	0.410509	0.243029	-0.308393
508	T69603*96E1	complement component 1, r subcomponent C1R	Hs.1279	1.32715	0.220233	0.706212	1.36203	1.37167	1.21516	0.28082	1.2744	-0.416065	0.330124	-0.166767	0.00607874	0.191601	0.315096	0.133318		-0.217574	-0.0628644	1.08342	0.462484	0.27898	0.443301	-0.309598	0.500819	0.156136	0.411225	0.235011	-0.317976	0.313447	0.433784	-0.0987342	0.516964	-0.41569	0.229051	0.211702	0.987404	0.661858	1.25248	0.688083	1.27401	1.76581	0.84788	1.20432	0.126618	0.0351434	0.392052
509	AA284954*96E5	colony stimulating factor 1 receptor CSF1R	Hs.174142	2.95433	1.47807	2.40443	4.30938	4.14073	3.27523	1.87635	1.95176		1.14604	1.0676	2.16373	3.15752	2.55185	1.93799		0.261823	1.88802	2.46817	1.73858	1.34045	1.0772	0.818881	2.43542	1.67985	2.04622	2.4661	2.79917	2.60505	1.47023	1.59539		1.1632	1.41569	1.12509	2.75183	2.3186	2.34123	3.30222	2.97576	3.87495	2.89069	1.93731	2.28387	2.19644	2.09624
510	AA680136*96E9	coagulation factor V (proaccelerin, labile factor) F5	Hs.30054	-0.723291			-0.883985	-0.812377	0.888633							0.609086	1.48269	0.763952		0.143651						-0.132515	0.693438	0.906174	0.683434	0.365862	1.34813	0.824179	0.386177									0.876123				0.731389	-0.378382	0.736772
511	AA150487*97E1	Alkaline phosphatase, placental (Regan isozyme) ALPP	Hs.284255	0.223115	0.270452	0.919046	0.0906131	-0.0109065	0.603547		0.0107918		0.215724	0.900088	0.0878708	0.00827548	0.606129	0.651247		-0.0763027	0.355705	-0.519175		0.336965	0.677286	0.0546786	0.817041	0.341296	0.525463	0.617175	0.477806	0.244108	1.03919	0.125785		-1.19147	-0.137369		0.390066		0.29909	0.163848	-0.0501985	0.0829378	0.170766	-0.174152	-0.168596	0.407921	0.423623
512	AA664101*97E5	aldehyde dehydrogenase 1 family, member A1 ALDH1A1	Hs.76392	2.07933	0.530155	-1.75188	2.76184	-1.75644	-0.996229	-1.57382	-3.00919	-2.60422	-2.63955	-2.25663	-0.81357	-1.75237	-1.39982	2.4905		-0.425326	-3.39413	-2.46888	-1.99704	-3.12259	-2.1022	-0.993424	-1.80956	-2.29436	-0.297235	-2.29556	-2.59536	-1.26652	-2.68806	-2.27377	-1.64238	-2.89257	-3.40289	0.907069	-1.30771	-1.68104	-1.02317	3.93838	-0.414386	0.452384	-1.31653	0.485908	-2.46135	0.216428	-2.2608
513	W74536*97E9	advanced glycosylation end product-specific receptor AGER	Hs.184	0.091663	0.578681	0.509392	0.250712	-0.585485	0.845078	0.0722981	-0.211961		-0.154871	0.371349	0.0142589	1.237	0.569437	0.873673	1.06248	0.349952	0.786284	0.197115		-0.106749	-0.0304267		-0.0589527	0.30889	0.177976	0.582145	0.606507	1.59753	0.0940517	-0.121202	0.974773	0.2772	0.669876	0.0611293	-0.113027	0.590603	0.384871	1.45611	0.101706	0.458145	0.396114	0.243158	0.419261	0.847	1.19859
514	R44357*98E1	hypothetical protein FLJ20736 FLJ20736	Hs.48712	-1.04086	0.486342	-0.740333	-0.697889	-0.0400567	-0.238302	-0.519051	0.627076	-0.403246	-0.46201	0.00911022	0.0684104	-0.091675	-1.38957	-0.688985	-0.707449	0.414424	-0.684479	-0.0800034		-0.224668	-0.00632082	-0.498566		0.0832347	3.62666	-0.469138	0.332889	-0.437166	0.0829181	-1.03059	0.445826	-0.620504	-0.776756	-1.24933	-0.507507	-0.35034	0.388585	0.518856	-0.136958	0.443096	0.382134	-0.612895	-0.473488	-0.0521456	0.244617
515	T58441*98E5	T58441		1.27614	0.97736	1.23898	0.992177	0.650654	2.28448	0.704613	0.252854		0.314781	1.00783	0.77276	2.13733	3.84802	2.08018		0.150914	0.533499	0.270681	0.864468	0.679788	0.721811	0.314295	0.739615	1.93993	1.75845	2.22842	2.90112		1.15383		-0.100024	0.957282	0.771829	0.075249	0.502012	1.37271	1.17559			1.47773	1.82834	1.81436	2.30946	2.08415
516	AA488087*98E9	FK506 binding protein 9, 63 kDa FKBP9	Hs.302749	1.0887	0.478801	-0.225406	-0.425297	-0.220895	0.327234	-0.220707	0.0562176	-0.710324	-0.528739	-0.390775	-0.553035	-0.155743	-0.770481	-0.0561263	0.425014	-0.795266	-0.094537	-0.110916	-0.0214383	-1.34476	-0.774829	-0.410535	-0.352401	-0.926206	-0.430913	-0.901176	-0.361774	-0.984322	0.191453	-0.331723	-0.36745	-0.377634	-0.62341	0.0703938	0.179194	-0.354686	-0.128675	-0.871699	-0.757989	-0.488566	-0.291513	-0.694905	0.300668	-0.331006	0.178611
517	AA488177*107E1	dynactin 4 (p62) DCTN4	Hs.180952	-0.480351	0.646524	0.0251543	-0.159411	-0.0674421	0.536456	0.671929	0.0348465	0.524448	-0.170913	0.272436	0.231255	0.0653167	-0.29383	0.547501	0.477156	0.0733239	0.283295	-0.39843	0.000133851	0.513063	-0.353486	-0.1253	-0.167875	0.620943	-0.0375912	-0.368733	-0.0112074	0.552927	0.0444909	-0.866294	0.0618128	0.231529	-0.164676	0.0944589	0.194285	0.398476	-0.0278282	-0.26427	-0.24929	-0.346107	0.787952	-0.730726	-0.266706	-0.528053	0.388231
518	R41730*107E5	Homo sapiens clone 23700 mRNA sequence R41730	Hs.66187	0.605261	0.931734	0.582522	-0.9479	-1.47549	0.575134	-0.929433	-0.794917		-0.889251	-1.81016	-1.1634		-0.730386	-0.460433	-0.880696	-0.0186626	-1.81165	-0.41051	-1.53113	-0.837339		-0.370182		-2.4013		-2.51927	-2.08478	-2.48612	-0.82416		-1.27386	-0.940753	-1.69625	-1.01847				-0.992165	-0.740998		-0.160013	-3.1072		-1.15983	-2.12345
519	AA425682*107E9	likely ortholog of mouse gene trap locus 3 GTL3	Hs.279818	0.0203532	0.862507	-0.774862	-0.431188	-0.707282	-0.0289449	-0.683638	-0.725923	-0.543592	-0.555547	-0.530193	-0.983223	-0.823387	-0.532134	-0.320295	-0.690654	0.73353	-0.606727	0.082679	-0.0502215	-0.719571	-0.466831	-0.499437	-0.954417	-0.604001	-0.850294	-0.734478	-1.1097	-0.0181052	0.415007	-0.400409	-0.547221	-0.133956	-0.255659	-0.399159	-0.29018	-0.765181	-0.923435	-1.15368	-0.914886	-1.02617	-0.772578	-0.662389	-0.183011	-0.409176	-0.872146
520	R55705*108E1	hypocretin (orexin) receptor 0	Hs.150968	0.475949	0.109634	0.238841	-0.151323	-0.367341	-0.100895	0.247729	-0.373502			-0.0598091	0.206999	-0.115661		0.165487	-0.979795	0.191299	0.330184	0.246218		0.278725		-0.37134	-0.525865	-0.10449	-0.161393	-0.834332		-0.218777			-1.64572								0.427708	-0.509652	0.139733	-0.75553	-0.7776	-0.326097	-0.660086
521	H10939*108E5	FAT tumor suppressor (Drosophila) homolog 1	Hs.158159	0.12984	-0.0274902	3.23523	2.91081	0.781705	1.35948	-0.161359		0.558304	0.895633	1.0143	1.6384	0.490966	2.57265	0.16576	1.90599	1.03376	1.47197	-0.327596	1.06928	1.17179		-0.300672	3.42456	0.456898	0.207296	1.04002	0.0314529	-0.0982839		0.965734		2.54753	-0.103606	2.55518	4.26297	0.440752	1.19541	1.75861	0.0929905	-0.0559038	2.36438		-0.644892	-0.00465239
522	H18927*108E9	ESTs	Hs.322922		0.596534	0.522091	0.129173	-0.010931		-0.574432					-0.50971			-0.119843	-1.28311	0.475013	-0.328082	0.578012		-0.455747		-0.258952	0.428168	0.158287								0.491579	-0.0158426						0.14838					-0.276576
523	AA434088*109E1	ribosomal protein L15 RPL15	Hs.74267	0.138204	-0.0495577	-1.07166	-1.62367	-0.272151	-0.43966	0.146157	-0.133956	-2.05895	-3.0439	-2.89706	0.227229	-1.92804	-3.32119	-2.49754	-0.72162	-1.314	-0.0837715	-1.49063	-3.10548	-4.11761	-0.776834	-1.54928	0.0765681	-2.5847	-2.00601	-1.18376	0.54906	-3.36744	-1.78381	-3.25646	-0.525296	-1.77183	-1.30753	-2.70777	-1.45698	-3.39064	-1.10222	-1.58293	-0.472038	0.920943	-2.17091	-1.20241	-2.68143	-0.196462	-1.0359
524	R94175*109E5	R94175		-0.245146	0.138855	0.351578	0.10092	-0.0199401		0.014299	-0.0409348		-0.61929	-0.0296327	0.59842	-0.685614	-0.173778	-0.282236	0.0321944	0.160228	0.386115	0.00932939		-0.352691	-0.477688	-0.33673		-0.0301238	-0.114872	-0.706863	0.385453	-0.685145	-0.0667133	-1.09922		-0.381718	0.149773			0.161613	0.217092	-0.511349		0.654876	-0.650131	-0.706546	0.0950773	0.117788	0.0165075
525	AA176688*109E9	ESTs AA176688	Hs.269284	0.092288	0.305392	0.078637	-0.013369	0.309235	0.0222369	0.63131		0.175348	0.02803	0.0836266	0.126953	-0.176247	-0.0942067	0.320635	-0.0996971	0.0632832	0.12395	0.0463214	0.0784478	0.296882	-0.132565	-0.369731	0.354181	0.198632	0.62084	0.0303436	0.0439139	0.345701	0.213873	0.00328041	0.521705	-0.06192	0.249968	0.427124	0.137956	0.431057		-0.0480255	0.249138	-0.265011	0.619071	0.345926	0.250111	0.0892338	0.154782
526	AA460968*110E1	protein kinase, interferon-inducible double stranded RNA dependent activator PRKRA	Hs.18571	0.072272	0.489604	0.0280373	-0.528066	0.0280456	0.885708	-0.605272	0.234384		-0.72083	-0.192623	0.195292	-0.447568	0.0415644	-0.832218	0.416922	0.0635459	0.00625233	-0.133082	-1.36431	-1.63232		-0.473789	-0.35726	-0.235603	-0.3851	-1.41568	-0.716153	-0.761059	-0.0501677	-0.961782		-0.040488	-0.680545	-1.67062	0.335476	-0.727552	1.10686	-0.465974		0.357275	-0.446001	-1.08072	-0.541533	0.26823	0.0465822
527	AA085713 | AI732405*110E5	ESTs, Moderately similar to T17242 hypothetical protein DKFZp586B1417.1 [H.sapiens]	Hs.146245	0.578554	0.452892	0.485441	-0.17	0.180082	-0.696504	-0.845938	0.454902				-0.78999	-1.15344	0.0319544	0.0172409	-2.21133	0.148274	-0.246369	-0.400004				-0.686946	-0.666314	-0.349599	-0.675019	-0.98545		-1.34197	-0.00708866				-0.703859				-0.494365	0.0432413		-0.17975	-0.518153	-0.369462	-1.23166	-0.379713	-0.834267
528	AA187979*110E9	ESTs, Moderately similar to RUXG_HUMAN SMALL NUCLEAR RIBONUCLEOPROTEIN G [H.sapiens]	Hs.192032	2.13175	1.81898	1.45986	1.3241	1.59987	3.88033	1.41672	1.34882			2.55124	2.61179	4.4557	4.65286	3.58328	3.54839	0.329917	1.10582			2.28649	4.53204	0.20642		4.43942	4.27183	3.60949	3.59834	3.35347	2.18291	2.60157						3.71165	2.62877	2.28868		3.73047	3.42151	4.13735	3.93961	3.2395	3.61254
529	AA858175*177E1	runt-related transcription factor 2 RUNX2	Hs.121895	0.877355	1.32851	-0.554311	-0.643176	0.371093	-0.611937	-0.113097	1.03071		0.33822	-0.522837	0.0964514	-1.11826		-0.766207		-0.152216	-0.828473	-0.331759		-0.107047		-0.623107	0.150029	-0.787651	-0.358299	0.207311	-1.28887	-0.649402		0.0788259		-0.111712	0.106143		-0.729065	-1.33244	0.258771	-0.383597		0.149688	-0.879178	-0.349176	-1.0901	-0.149994
530	AA916327*177E5	protective protein for beta-galactosidase (galactosialidosis) PPGB	Hs.118126	0.773275	-0.952737	0.134746	0.675953	0.377561	0.558194	1.13376	0.161856		0.158791	-0.350135	0.409743	0.23845	0.327023	0.378438	0.0572943	-0.550196	-0.272683	0.280692	0.699983	0.409913	-0.46546	-0.335916	0.375221	0.213679	0.369173	1.48949	0.957471	0.390789	0.282177	1.17642	0.101124	0.320288	-0.287195	0.906912	0.450745	0.423807	-0.21095	0.928834	1.77712	0.714368	0.730242	0.480482	0.0720311	0.733491	0.466103
531	AA916908*177E9	KIAA0368 protein	Hs.3852	-0.381169	-0.589555	-0.282106	-0.5942	0.496698	0.0410922	0.445508	0.822604		-0.520104	-0.543146	-0.0112481	0.100846		0.00455443		-0.023908	0.576872	-0.44286		-0.0990813	-0.0324758	0.300978	0.253156	-0.374653	-0.601959	-0.294005	0.279108	0.112755	0.288223	-0.174192	0.176073	0.0272843	0.224203	-0.949357	-0.303304	-0.722306	-0.13261	-0.35383	-0.0622558	-0.0422948	-0.15571	-0.596553	-0.122968	-0.120674	0.211125
532	AA705225*178E1	myosin, light polypeptide 4, alkali; atrial, embryonic MYL4	Hs.298161	-0.681424	0.0248657	-0.112942	-0.40374	-0.558931	-0.424502	0.0576861	0.25702		0.131476	-0.0116143	-0.490554	-0.0733857	0.438733	0.15388	-0.771601	-0.232599	-0.369672	-0.162065	0.445599	-0.126745	0.181969	-0.195966	-0.0655588	0.0264746	-0.546076	0.405822	-0.389423	0.286148	0.366823	0.498336		0.523251	-0.664039	-1.33849	-0.354851	-0.472249	-0.338479	-0.141705		-0.91814	-0.567119	-0.327261	0.0439465	0.445159	-0.788395
533	AA045508*178E5	adenylyl cyclase-associated protein 2 CAP2	Hs.296341	-1.93869	-0.843347	-0.908354	-1.23835	-1.20886	-0.990131	-2.44948	-0.387806	-1.81481	-0.844123	-1.52922	-2.40756	-1.45952		-1.88388		-0.934238	-2.03912	-1.36223	-1.72361	-1.61027		-0.898699	-0.450777	-2.21203	-0.691301	-1.59231	-2.815	-1.92372	-2.29673	-1.52641	-1.86477	-0.740818	-1.78443			-2.14676	-1.59149	-0.819067			-1.32648	-2.10083	-1.53321		-2.00514
534	AA043280*178E9	fasciculation and elongation protein zeta 2 (zygin II) FEZ2	Hs.103419	-1.17861	-0.684429	-0.595833	-0.319186	0.0920938	0.926213	0.0148735	0.227206	-0.0850174	0.102251	-0.0513978	-0.216644	-0.28224	-0.373084	-0.118275		-0.326029	0.0905803	0.301854	-0.517708	0.204814	-0.210752	0.784908	0.0955181	0.377392	-0.598588	0.00289098	-0.853593	-0.0531731	-0.853479	-0.814012	-0.573415	-0.10422	0.346232	-0.419488	-0.544023	-0.732922	0.242224	-1.26063	0.141814	-0.0362247	-0.0677099	0.297697	-0.472447	0.167033	-0.0425906
535	H90287*179E1	ubiquitously transcribed tetratricopeptide repeat gene, X chromosome UTX	Hs.13980	0.0764867	0.0664642	-0.517337	-0.628719	-0.0401167	0.40634	-0.0553757	-0.00227658		0.474128	0.489302	0.239703	0.8535	0.845054	0.889452	0.19741	0.20716	0.0555134	-0.0392906	-0.447418	0.877937			0.272901	0.616303	0.761561	-0.0478996	0.743684	0.168288	2.02354	-1.36867		0.176685	1.01068	0.127915	1.01415	-0.532379	0.417788	0.0579249	0.379312	0.603221	-0.422672	0.606107	1.34805	-0.0638321	-0.310295
536	N51014*179E5	apoptotic protease activating factor	Hs.77579	0.711724	1.00645	1.09397	0.328688	0.72339	1.3675	0.764279	0.367961	1.19095	0.692959	0.655007	0.309394	1.57907	1.54385	1.22821	1.24046	-8.72e-05	0.734672	0.42747	0.787254	0.338473	1.39834	1.42703	0.611576	1.33135	0.874708	1.33979	1.51483	1.05263	0.337635	0.737103	0.485949	0.841482	0.212559	0.611355	0.308473	0.853644	0.328005	0.549365	0.449528	0.997676	1.00166	1.87739	1.61302	1.07462	1.28845
537	R26707*179E9	Human Chromosome 16 BAC clone CIT987SK-A-363E5	Hs.24103	0.567595	0.319232	1.03357	0.209763	0.71023		2.45655			0.410463	0.806627	1.89447			0.384968		0.114377	0.688988	1.65392		1.36169		0.87488		0.404653		1.06299		-0.0797896				0.494162	0.88361							0.73682		1.2505
538	AA676223*180E1	acyl-Coenzyme A oxidase 3, pristanoyl ACOX3	Hs.12773	-0.0923306	-0.186031	-0.426682	0.210387	0.123301	0.622641	2.70417		2.52972		0.85013	0.927648	1.16704	0.888082	0.928563		0.523776	2.16746	0.796402	2.89589	2.29139	1.66578	1.21903	1.79898	1.18507	2.21113	1.70237	0.813964	1.59463		1.65246	1.52003	0.847605	1.04241			1.35162	1.26565	1.09774	0.910862	0.279416	1.14441	1.38539	1.06935	-0.166235	0.444615
539	AA701944*180E5	transformer-2 alpha (htra-2 alpha)	Hs.24937	-0.00626588	0.584529	0.0436535	-0.0849696	-0.203021	-0.781682	0.316849	0.20738	0.637298		0.49663	0.286558	0.218389	-0.00928144	-0.114655		-0.00672146	0.96044	0.20409	0.468109	0.417523	0.409039	0.430023	0.39497	0.753465	-0.272258	0.207116	0.784768	-0.181265	0.0973026	0.200136		0.354505	0.552587	-0.298416	-0.198408	-0.0715617	0.54866	-0.27811	-0.0480587	-0.110627	-0.0120644	-0.459216	0.43872	0.798942	0.88348
540	AA701981*180E9	C2f protein C2F	Hs.12045	-0.962671	-0.222539	0.0663257	-1.03954	-0.47793	-0.0840721	-0.307858	1.4742	-0.116824	-0.252398	-0.167949	-0.660099	-0.145067	0.0129291	0.1088		-0.134522	-0.321822	-0.301096	-0.284002	-0.260236	-0.245069	0.445641	-0.150932	0.179533	0.248993	0.246632	0.182147	-0.0969328	-0.563852	0.176209	-0.281856	-0.34016	-0.434389	-0.131693	-0.299873	-0.328966	-0.284172	-0.141624	-0.747662	-0.925907	0.759058	0.259429	-0.0804191	0.505045	0.416829
541	AA775355*181E1	X-ray repair complementing defective repair in Chinese hamster cells 5 XRCC5	Hs.84981	-0.823205	0.185294	-0.972705	-0.415016	-0.64482	-0.575838	-1.55324	0.0322429	0.216258	0.081758	-0.270386	-0.00229623	0.102273	0.260177	-1.1337	0.341491	-0.156778	0.115392	-0.458414	-0.137883	-0.218141	-0.387707	0.471247	-0.0431848	0.123023	-0.444569	-0.742853	-0.647881	-1.04542	-0.124014	-0.615324	0.13325	0.197456	-0.446363	0.326453	-0.517908	0.173192	0.00747934	-0.314291	-0.643905	-0.481978	-0.818929	-0.962907	-0.0231748	-0.34105	-0.316352
542	AA676664*181E5	doublecortex; lissencephaly, X-linked (doublecortin) DCX	Hs.34780	-0.309503	0.616918	-0.0112205	-0.485562	-0.1433		-0.179803	0.329656	0.177394	0.259668	0.268931	0.329081		1.1198	0.0131467		0.0360541	-0.0386637	0.0722872		-0.140315	-0.103322			0.342782	0.469647	0.345891	0.446395	0.326298	0.257968	-0.15863		0.423442	-0.200525	0.0283268		0.660765	0.216765	0.281373		0.0736263	0.28939			0.219814	0.628735
543	R43532*181E9	neurexin 1 NRXN1	Hs.22998	-0.0270519	0.740635	-0.0591776	0.424252	0.107195	0.770309	0.554633		-0.117123	-1.89653	0.0149719	-0.339142	-0.43483	-0.405749	0.0301654		-0.312575	-0.452215	0.24501	-0.103788	-0.0970917	0.320821	-0.0245003	-0.603171	-0.00955529	0.18955	0.145957	0.145207	0.283142	-0.343834	0.70551	-0.556842	-0.275389	0.00684874	0.177135	0.875477	0.0612894		0.980516	0.0936549		0.234188	1.05143	-0.162069	0.219437	-0.351242
544	R92812*184E1	ESTs R92812	Hs.34024	0.476946	0.431606	1.03338	0.273479	0.567867		0.514041	0.839454	0.732194	0.604527	0.694353	1.06386			0.964685		0.551549	0.784986	0.626638			1.64261			0.486729						2.04138			0.280087								0.736877	7.2363
545	R92773*184E5	ESTs R92773	Hs.105791	-0.158403	-0.291208	0.0520127	-0.785174	-0.372619		0.441616		0.898198	0.591023	0.932751	0.471285	2.1768		0.593413		0.0548004	0.206814	0.618779		1.64268	1.59093	0.672904		0.701484	0.393322	1.26232	1.41461	1.14426		1.09305		0.307102	0.884764			0.594899	0.401301	0.537446		0.0890867	-0.0221798		1.18159	0.365076
546	R94495*184E9	ESTs, Moderately similar to hypothetical protein FLJ20489 ] R94495	Hs.237306	0.144109	0.51769	-0.0677902	0.107971	0.331991	0.0217943		0.283343	0.644577	-0.00950629	0.0860159	0.238881	0.422387	-0.208712	0.373315		0.298473	0.605592	-0.188766		0.685496	0.336993			0.545882	-0.0802162	0.394894	0.687976	0.212987	-0.367428	0.044854		0.0581666	0.358251				0.135038	-0.316805		0.325986	0.16479		0.754299	0.374455	0.574978
547	AA521015*182E1	DnaJ (Hsp40) homolog, subfamily C, member 4 DNAJC4	Hs.172847	0.95248	0.259438	0.0179762	0.0565911	0.219368	0.76397	0.824431	0.565072	0.561837	1.07119	0.566142	0.491796	1.37266	1.14646	1.03464		-0.142352	0.980646	0.414757		0.956245	0.685823	0.93415	0.256418	0.73536	0.248676	1.56308	0.810244	0.95008	0.322635	0.620701	0.101496	0.696732	0.0647901		0.663699	1.16585	0.243674	0.934229	0.655216	0.333303	0.361888	1.63012	1.39472	0.922866	0.707646
548	AA451900*182E5	protein predicted by clone 23733 HSU79274	Hs.150555	-0.272584	0.176647	-0.263322	0.0737518	0.041381	-0.0257361	0.284642	0.185717	0.163141	0.338647	0.418849	0.0651288	0.201631	-0.109557	0.0941671	0.0712256	0.096077	0.064471	0.374202	0.415985	0.32293	0.121447	0.29835	0.389973	0.305177	0.170623	0.580171	0.0453294	0.175106	-0.218921	0.186889	0.250187	0.36163	-0.0331189	-0.121549	-0.0859497	0.754033	0.0888129	0.401431	0.347881	0.732183	-0.081001	0.5501	0.0132496	0.0313082	0.199715
549	AA598982*182E9	trophinin TRO	Hs.259802	-0.402948	0.284632	-0.259581	-0.320337	-0.342743	-0.156516	-0.2604	0.679716	0.31793	0.0107353	0.352315	-0.127832	-0.0514792	-0.213878	0.1134	0.0791113	0.0259521	0.281216	0.104123	0.14864	0.749956	-0.12687	0.218733	-0.10115	0.550526	0.145341	0.241858	-0.175535	0.0769643	0.0241664	0.199727	-0.197073	0.189606	0.424031	-0.12	-0.155047	0.12264	-0.116607	-0.325271		0.0488725	-0.0368354	0.134773	0.259617	-0.0181478	0.150757
550	AA775364*183E1	KIAA0699 protein	Hs.17411	-0.565308	-0.672387	-0.998396	-0.0977391	-0.429402	-0.638801	-0.15367	0.0519014	0.0519126	0.154639	-0.0359194	-0.180255	-0.0290289	-0.516621	1.06845	-0.509466	-0.138551	0.212449	-0.45805	-0.749972	0.703289	0.105186	0.77108	-1.14046	0.197123	-0.20475	0.687845	0.327359		0.450084	-0.189554	0.569785	-0.753781	0.0327864	-0.012437	-0.802431	0.0881192	-0.370325	-0.554748	-1.33834	-0.358627	-0.270131	-1.12343	0.024656	-0.594905	-0.420677
551	AA279990*183E5	transforming, acidic coiled-coil containing protein 2	Hs.104019	-0.904874	0.228781	-0.559156	-0.632811	-0.654282	0.0684175	0.202468	-0.050147	-0.707627	1.61309	0.538706	-0.113116	-0.732017	-1.21422	0.39292		-0.391281	-0.859657	1.67637	-0.769214	0.213815	0.0333843	-0.260859	-0.235742	-0.124027	0.119064	-0.185207	-0.352418	-0.144233	-0.0976238	0.772106	-0.736694	-0.819518	-0.36394	2.03076	-0.483966	-0.203443	-0.214163	-0.338254	-0.744264	-0.838717	-0.311417	-0.597916	-0.104352	-0.339206	0.103257
552	R05307*183E9	ribosomal protein S4, X-linked RPS4X	Hs.446628	0.909121	-0.101732	0.515534	0.0972169	0.0128857	1.37748	0.539361	0.774131	0.211226	1.22535	0.317523	0.51701	1.7165		0.508003		0.280142	1.48605	0.74846	0.892677	0.861484	0.715101	0.111657	0.12067	0.814375	-0.0882431			0.356578	0.127513	0.768155			0.0484108			0.0581197	0.0916104	-0.196898		0.0708018	0.197692
553	AA983462*220E1	lamin B1 LMNB1	Hs.89497		0.870466	-0.806035	-1.18013		-0.692515	-0.48569	-0.520797		-0.897394	-0.222636	-0.697814	-1.3937	-1.50436	-0.950372		-0.168071	-1.52545	-0.821391	-3.18239	-1.06414	-0.787881	-0.978903	-1.10015	-0.36697	0.151601	-0.91684	-0.339443	-0.114049				-1.89876	-0.442437		-2.04609				-1.20498	-1.15634	-0.719712	-1.41902	-0.887844	-0.88913	-0.602123
554	AA985442*220E5	mannosidase, beta A, lysosomal MANBA	Hs.115945	1.54429	0.204114	0.177429	0.435256	0.342362	0.340773	0.890881	0.0912917	0.779529	0.649817	0.567963	0.221007		0.877665	0.662702	0.754593	0.351256	0.568871	0.423247	1.16405	0.718956	0.927424	0.529259		0.345463		0.826318	0.169784	0.662289	1.23884	0.88199	0.893917	0.234358	0.05925	0.499265	0.0229127	0.969893	-0.393355	0.675462	0.670985	0.227791	0.439597	0.275492	-0.286847	-0.174438	1.20252
555	AA988798*220E9	signal recognition particle 14kDa (homologous Alu RNA binding protein) SRP14	Hs.180394	-0.121479	0.147507	-0.392082	0.0854151	-0.580764	-0.123818	0.437418	-0.385266	0.0926776	0.627883	-0.202613	0.246671	0.349869	0.313818	0.0968064	0.38863	0.0236123	0.522398	-0.0453967	-0.263387	0.56586	-0.212389	0.459609	-0.239592	0.210369	-0.235162	0.107901	-0.115088	-0.0554801	-0.228214	-0.764724	0.15817	0.107847	0.176827	0.250935	-0.194661	0.182025	-0.729311	-0.321306	0.000998636	-0.353343	-0.255626	-0.104875	-0.0909453	-0.162708	0.182205
556	AA917769*221E1	Homo sapiens cDNA: FLJ21847 fis, clone HEP01909	Hs.306813	0.0735647	0.560779		0.565868							0.626748		1.00659	0.836544			-0.125028	0.382544			0.635157				0.828419	0.736263	0.58371	0.527703	0.512205	1.60273		0.497872	0.474979						0.359241	0.249956	0.217824	0.903363	0.808316	1.37492	0.673643	0.411193
557	AA962407*221E5	GW128 protein GW128	Hs.182238	-0.0924642	0.926628	0.461013	0.0196736	0.393346	0.568276	1.09987	0.506895	0.837666	0.83642	0.547035	0.216139	0.870459	0.75776	0.524264		-0.136693	0.733249	0.643765		0.778699	0.597762	0.818944	0.644158	1.21295	0.458899	0.979381	0.958031	1.14464	0.847009		0.933954	0.135743	0.737743		0.230157	1.32486	0.464044	0.0377676	0.223816	0.357814	0.469061	4.08332	-0.12501	0.365457	0.0756644
558	AA983888*221E9	semaphorin 6C SEMA6C	Hs.54937				1.60354	0.31923												0.0801417		0.410773															0.0956705
559	AA705409*222E1	ESTs, Weakly similar to T23762 hypothetical protein M142.5 - Caenorhabditis elegans [C.elegans]	Hs.57844						0.652418											0.251889	0.457329									0.753757		0.317657
560	AA705528*222E5	ESTs AA705528	Hs.190381	-0.357816							0.416448			0.470529	0.976056					-0.407819	1.65023			0.202977						0.673496	0.793877	0.558563					-0.149304					0.956701			1.06691		1.36897
561	AA699888*222E9	ubiquitin specific protease 20 USP20	Hs.5452	0.0727745	0.299556	-0.448812	-0.202901	-0.131786		1.08929	0.495026		-0.216955	-1.04343	-0.512189		0.0376727	-0.507651		-0.0466926	0.770055	-0.62552		-0.0878602				0.146934	-0.365449	1.28761	0.448525	0.1359	-0.741664			-0.285756	-0.462834				-0.514942	-0.086656		0.258476	-0.352118		0.373976		-0.401031
562	AA150505*223E1	complement component 1, q subcomponent, receptor 1 C1QR1	Hs.97199	0.857195						1.02959	1.7546				0.494659					0.768599	0.980756											1.16111					1.30151						0.667848		0.908715	2.52176	0.917075
563	AA156935*223E5	hypothetical protein CAB56184 CAB56184	Hs.241575	-0.206426	0.133969	0.581096	0.704207	0.727409	0.274116	1.14654	0.240551	0.411338	0.716998	0.515548	0.612145	0.851189	0.665605			0.391842	0.765666	0.485186		0.42779	0.272118	0.254479	0.591404	0.0271948	0.479841	1.17028	0.140428	0.123519	0.40354	0.576525	0.275277	0.499329	-0.237683	0.978331	0.189975	1.04596		0.293862	0.70375	0.278554	0.029888	0.988238	0.152731	0.406494	0.29125
564	AA156964*223E9	neuropilin 2 NRP2	Hs.17778		-0.446977	-0.349554	-0.153961	0.127051		-0.4501	-0.624259				-0.340148					0.0767425	-1.32231	-0.108057		-0.939224								-0.303209					-1.15962					0.168665			-0.271175			-0.442015
565	AI015437*288E1	Homo sapiens IMAGE:729984 clone, mRNA AI015437	Hs.186927																	0.654386
566	AI016238*288E5	calcium channel, voltage-dependent, L type, alpha 1C subunit CACNA1C	Hs.89925	0.306189	-0.497733	0.132274	-0.779569	-0.435352		-1.13583	-2.07433		-0.792065	-0.507254	-0.919002	0.292078	0.488458	0.24758	1.05918	0.413011	-0.400216	-0.135782		-1.03014	0.0173906	0.717677	-1.29896	-0.370618	0.858224	-0.951013	0.162395	-0.44762	-1.24361	-1.23744	-1.43749	-0.789931	-0.765048			-1.42429	-0.401899	-0.832318	-1.13306	-0.397128	-0.251826	0.814037	-0.253757	0.0525134	-0.0134118
567	AI015254*288E9	ESTs AI015254	Hs.122384	0.258014	0.107864													0.264114		0.496837																	1.6931
568	AI026073*289E1	ESTs AI026073	Hs.24198	-0.931843	0.113385	-0.753253	-1.35355	-1.74155	-0.579906	-1.94548	0.672045		-0.618657	0.0621022	-0.093861			-0.328099		-0.168077	-0.416124	-0.818818		-0.859628				0.277059	-0.0385394	-0.485292	-0.395964	-0.135463	-0.550136		-0.690898	-1.15196	-0.726901			-0.300465	-0.47226	-2.02482		-0.260229	-0.321803	-0.00849534	0.612543	-0.552392	-0.0776478
569	AI023136*289E5	KIAA1074 protein KIAA1074	Hs.129218	0.297726	0.541776	0.940906	0.156322	-0.0435572	0.913058	0.0149348	-0.209058		0.238155	0.864464	0.248351	0.170546		0.744006		0.538288	0.235693	-0.485741	-0.29667	0.295629	0.108439	-0.155151		0.391913	0.521248	0.145886	0.166486	-0.0153083	1.01656	-0.0249015	-0.112511	-0.774129	0.254152	-0.280841	0.0583145	0.645801	0.28605	0.13479	-0.431991	-0.333745	0.166235		0.0960921	-0.0459223	0.70484
570	AI022821*289E9	ESTs AI022821	Hs.131393	0.161353	0.422646		0.132395	0.389805	0.426766	0.41343	0.217116		0.347138	0.861441	0.101022		0.70715	0.606836		0.102467	0.248016	-0.150781		0.0170515				0.736457		0.764469	0.0769425		0.278166			-0.501398	-0.0635886				0.52177	-0.151029		0.195552	1.14954	1.05791	0.249361	0.170955	0.604213
571	AA458825*290E1	mitochondrial translational initiation factor 2 MTIF2	Hs.149894	-0.759895	-0.203002	-0.0243103	-0.169532	0.243811							0.343229	0.537679	0.476793	0.256289		0.275076	0.0730929	-0.388582		0.504772		-0.136221		1.35531	0.423199	0.57706	0.613871		0.797641				0.652526					-0.0498092				1.36103	0.262811	0.293254	0.833897
572	AA490613*290E5	H2A histone family, member X H2AFX	Hs.147097					-0.648937		-0.645362	0.49442	-0.22991			-0.527552	-0.12519	0.511492	-0.0282784		0.289355	0.135769	-0.356192		-0.35622			0.0266686	0.312397	0.221843	-0.0974513	0.0168983	-0.122904	0.356949	-0.0529943	-0.508137		-0.142201			0.490238	-0.0967727	-0.594408		-0.21249	-0.152566	0.726517	-0.184401	-0.296946	-0.0587608
573	H69878*290E9	retinoic acid receptor, beta RARB	Hs.171495	-0.255682	-1.30404	-1.43037	0.364478	-1.42344		-1.91893		-1.09725	-1.06323	-0.174958	0.477983	-0.243004	-0.470377	-0.165272		-0.0560322	-0.172138	-0.605819		-0.708345	-0.167148	0.070114	-1.06639	-0.00534291	-0.185941	-1.07483	0.176242	-0.701257	-1.20494	-1.19802	-0.925321		-0.334059		0.37864	-0.998936	-0.673552	-1.3429			-0.79091	-0.0639131	-0.615396	-1.07034	-0.634591
574	AA443087*291E1	Homo sapiens, Similar to CG2245 gene product, clone MGC:4293, mRNA, complete cds	Hs.91103	-0.0612717	-0.0420691	0.115518	-0.0625836	0.0906603	-0.181337	-0.444036		0.402515	0.327605	0.141609	-0.0525201	0.733422	-0.353672	-0.329795		0.0844748	0.133198	0.13393	-0.711918	0.250994	-0.697383			0.298307	0.0809215	0.191945		0.43946	0.335725	-0.0842111	-0.0294159	0.16215	0.274133	1.42946		0.0538745	-0.705567	-0.453357	-0.0743225	-0.345062	0.118391	-0.0601915	0.338826	-0.350866	0.126905
575	H98855*291E5	Homo sapiens clone 23785 mRNA sequence	Hs.184697	0.725371	0.586682	0.215668	1.66633	1.3682	1.05732	0.127516	0.530574	-0.366924	-0.69827	-0.0798389	0.919102	-1.14998		-0.235145		0.180033	-0.136593	0.306567	0.127318	-0.0260484		0.224757		-0.11723	0.701569	0.0301932	0.241274	0.145881	-0.448722	-0.253694	-0.297298	0.0359955	0.392598			0.0454079	1.02236	1.44618	1.60714	1.58562	0.65077	0.499823	0.157544	-0.0725231	-0.127956
576	N30042*291E9	clathrin, heavy polypeptide (Hc) CLTC	Hs.178710	-0.506314	-0.851466	-0.676904	-0.535377	-0.917855	-0.844943	-0.218935	0.2176	0.113343	-0.408343	-0.206227	-0.158815	-0.227396	-0.452553	-0.968434	-0.163577	-0.600137	-0.649952	-0.426531	-0.644235	-0.0842751	-0.233689	-0.356057	-0.104687	0.393069	-0.130065	-0.194198	-0.0465266	0.594343	-0.425565	-0.610134	0.295236	-0.0677055	-0.3189	0.558174	-0.452896	-0.116423	-0.234576	-0.308326	0.0343666	-0.308352	0.653366	-0.0648759	0.163237	-0.0137652	-0.403439
577	AA180004*292E1	kinesin family member 5B KIF5B	Hs.149436	-0.239396	0.616112	-0.172001	-0.287978	-0.568019	0.249073	-1.04973	0.117928	0.254964	0.0840045	0.322943	0.0503104	0.571208	-0.272214	-0.539245		-0.0491703	0.24208	-0.0689137	-0.400093	-0.0670699	-0.0545411	0.275289	0.164058	0.949925		0.149847	0.761458	0.605124	0.473947	-0.835557	0.799382	-0.509895	0.367997	-0.96971	-0.84249	0.785789	-0.212932	-0.509362	-0.637794	-0.198594	0.909071	0.401085	-0.186908	-0.0219078	0.754234
578	AA099408*292E5	AA099408			-0.0915379		0.312935													0.0589685	0.242769		-0.184173	0.625897				1.87739									0.327012
579	AA135422*292E9	KIAA1007 protein KIAA1007	Hs.279949	-0.393382	0.182137	-0.681547	-0.119823	-0.941722	-0.499444	-0.492128	-1.15537		-0.297562	-0.140152	-0.0617009	0.0420372	0.0393756	-0.221013		-0.230872	0.128307	-0.172202	0.244327	-0.473217	-0.696057	0.279144	-0.343706	0.37045	-1.03817	-0.228916	-0.565013	-0.241352	-0.375244	-0.594512	0.0701849	-0.0752729	-0.294321	0.195567	-0.467738	0.272875	-0.619901	-0.737652	-0.548925	-0.149312	-1.30344	-0.93192	-0.270168	-0.663315	-0.288351
580	N63783*293E1	polymerase (RNA) II (DNA directed) polypeptide B (140kD)	Hs.296014	-0.935858	0.842685	-0.606557	-0.455697	-0.501811	0.156091	0.192007	-0.79049	0.283746	-0.0369766	0.109097	0.0967317	0.298386	-0.183906	-0.527748	0.651346	0.0875725	0.168745	-0.0174148	-0.100501	-0.0149595	-0.164005		-0.0952586	0.390153	-0.174665	-0.000348492	-0.542669	-0.169951	0.236602	-0.252287	0.279097	0.0457435	0.418724	-0.0836985	-0.145498	0.22565	-0.22179	-0.494497	-0.514909	-0.335548	0.0176188	-0.00749267	0.0933949	-0.401397	-0.485504
581	AA699408*293E5	prp28, U5 snRNP 100 kd protein U5-100K	Hs.168103	-0.0934068	0.831212	0.173603	-0.321963	0.106357	-0.438707	0.714215	0.34297	0.250581	0.119719	0.258364	-0.0025197	0.23222	0.730505	-0.0106614		-0.102102	0.304369	0.396468	0.610541	0.169448	0.499867	0.41513		0.724697	0.474716	0.593275	0.504	0.379905	-0.173073	1.00105	0.140705	0.39191	0.000620364		0.128716	0.376463	0.727824	0.327903	-0.200086	-0.0333674	-0.161492	0.218807	0.648728	-0.063413	-0.372139
582	R17767*293E9	CDC37 cell division cycle 37 homolog (S. cerevisiae) CDC37	Hs.160958	-0.300432	-0.0967656	0.074997	0.00240569	-0.0474132	-0.682951	0.566051	0.0315451	-0.127502	-0.141083	-0.296513	-0.056115	0.287016	-0.212152	-0.0158999		-0.350704	0.65503	0.278853	0.200603	0.366317	-0.303147	-0.105922	-0.0108062	-0.16667	-0.259125	-0.0578401	-0.650156	-0.221993	-0.220012	0.102541	-0.371161	-0.133758	0.20749	-0.356321	0.258103	-0.314115	-0.193154	-0.453597	-0.824519	-0.113195	0.285702	-0.559342	0.147177	0.0240579	0.591691
583	AA774740*294E1	arginyl-tRNA synthetase RARS	Hs.180832	-1.4512	-0.241203	0.205664	-0.355849	0.138393	-0.714037	-0.280948	0.0920252	-0.0519832	-0.357971	-0.140946	-0.0990085	-1.28029	-0.566743	-0.502118	0.250061	-0.285732	-0.199048	-0.460388	-0.497804	0.413873	-0.231474	-0.422853	0.140918	0.269512	0.202317	-0.220278	-0.321786	-0.396525	-0.199991	-0.704516	0.167597	-0.195153	-0.0195467		-0.655623	0.196032	-0.497212	-0.396745	-0.357305	-0.795698	0.93027	-0.557522	-0.752231	-0.0123273	-0.0173285
584	AA904965*294E5	Burkitt lymphoma receptor 1, GTP binding protein (chemokine (C-X-C motif) receptor 5) BLR1	Hs.113916	-0.411767	-0.424552	-0.0513195	0.00312053	-0.0087085	0.739194	0.30592	-0.174558	0.0774636	-0.0292657	-0.225509	-0.386371	0.54377	0.131039	0.793287		0.128687	-0.222219	-0.0716062		-0.170566	0.493251	0.653165	0.122254	0.264732	0.681748	0.32729	0.794993	0.31267	0.275866	0.376947	-0.0427018	0.193973	-0.0883836	-0.369118	-0.416007	0.218055	-0.188134	0.848715		0.235244	-0.158532	0.894847	-0.0574158	0.1902	0.374888
585	AA928017*294E9	POU domain, class 2, associating factor 1 POU2AF1	Hs.2407	0.559271	0.126386	0.170087	0.330261	0.122884	0.645148	0.442449	-0.0666266		-0.0868459	0.0861143	0.23343	1.26319	0.989503	0.899474		0.230546	0.228966	-0.146881		0.284029	1.82819	0.0895189	0.806158	0.709538	0.430489	0.276017	1.01303	0.523767	0.787332	0.858073	0.828225	-0.347206	0.211574		1.38906	1.27497	0.557748	1.09477		1.12121	0.410812	1.09801	0.600375	0.36022
586	R51300*295E1	ATPase, Class II, type 9B ATP9B	Hs.91471	0.0977592	0.668803	0.00136148	0.0259223	-0.0170609	0.303897	1.17117	-0.431571	0.780471	0.61377	0.746749	-0.0238527	1.31956		1.0614		0.163278	0.660991	0.276466		0.0827487				1.12043		0.566808	0.652391	0.432384				0.277938	0.829839					0.652743			0.84425			0.351919	0.57108
587	R16078*295E5	R16078		-0.254647	-0.298848	0.00923031	-0.88421	-1.03237	-0.65466	-1.32622	-0.226857	-0.340553	-0.952601	-0.112444	-0.383506		-0.344461		0.739555	-0.115793	0.686239	-0.334601		-0.306764		-0.481525	-0.232522	0.496957	-0.811339	-0.452224	-0.0789794	-0.977529	-0.519557			-0.257859	-0.110743					-1.94714		0.176901	-0.148859		-0.775832		-0.15228
588	H94475*295E9	serine (or cysteine) proteinase inhibitor, clade F SERPINF2	Hs.159509	-1.33663	-0.454342	-1.04242	-1.56814	-1.78962	-1.41661	-1.29776	-2.04842	-2.41108	-1.53559	-0.966408	-1.37316			-0.994205	-0.691849	-0.173076	-1.73157	-2.03158	-1.90583	-1.16574		-0.711672	-1.14527	-1.63594	-1.39972	-1.56249		-1.61446	-1.01182			-0.867067	-1.80242			-1.66639	-2.41158	-1.925		-1.15945	-0.967449	-0.467099	-1.33182		-1.94256
589	AI148490*296E1	KIAA1504 protein KIAA1504	Hs.157426	-0.033124					-0.65576	-0.35332				0.588842						-0.155416	0.633457			0.190015				0.874168	0.694644	0.633676							-0.0809005										0.620847
590	AI190798*296E5	keratin, hair, acidic, 2 KRTHA2	Hs.41752		-0.336178		-0.36826			0.269215			0.479109	0.652136	0.264761					0.753977	0.522707	0.0217394		0.717421			1.47103										0.238387				-0.103431				1.40581		1.45156	-0.483881	1.28462
591	AI138404*296E9	B melanoma antigen	Hs.2355		0.69642		0.23359	-1.1924	-1.41753	0.316999	-0.295039	0.503913		0.270169	-0.00917683			-0.192312		0.186474	0.0878799	-0.147016		-0.313116					-0.237265	-0.233275	0.1612	-0.31066					-0.0797459					-1.03886		-0.206068	1.32284		0.0418988	-0.652906	-0.405909
592	AI340031*297E1	Homo sapiens ankyrin-like with transmembrane domains 1 ANKTM1	Hs.326646	1.23883			0.309263	0.997784	-0.359936											0.117381	0.294994	-0.249927								0.224636					-0.502907								2.03192	1.05823			0.280289		0.303968
593	AI299601*297E5	hypothetical SBBI03 protein SBB103	Hs.153639	-0.85406	0.420612	-0.647475	-0.881558	-0.886641	-1.07339	-0.353641	1.07517	-0.235369	-0.942796	-0.941913	-1.24503	0.377643		-0.388122		-0.117733	0.147273	-0.548956	-0.921209	-0.882125		-0.0849036		-0.0997514	-0.59984	-0.14459	-0.589035	0.0501478	-0.666786	-0.61125		-0.0689419	-0.211028			-0.337682	-0.933335	-1.18889	-0.557203	-0.616055	-0.485023	-0.0865772	-0.306137	-1.00948	-0.568718
594	AI300687*297E9	potassium channel, subfamily K, member 5 KCNK5	Hs.127007	-0.970739	-0.637		-1.09021	-0.96124									0.786142	0.549016		-0.00477513	-0.544915	0.0515419						0.686246	0.496856	-0.153721	0.768704	0.0540595					0.483412					0.100462		-0.342513		1.45483	-0.073802		0.145634
595	AI341099*298E1	AI341099		0.256054	0.352269	0.919571	0.503248	0.551293	1.33127				0.493897	1.3261	0.298482	0.424207				0.388575	0.541453	-0.070247	-0.576684	0.606323		0.0367105				0.338676	0.637339	0.266762				-1.11997	0.185385	0.115568			0.0510096	0.236147		0.548208	0.322827		0.217251	0.732774	1.24787
596	AI337169*298E5	testes-specific heterogenous nuclear ribonucleoprotein G-T HNRNPG-T	Hs.121605				0.0692036								0.236013					0.0193898	0.369791									-0.0492185		0.345767													-0.0305797
597	AI341605*298E9	PTPRF interacting protein, binding protein 1 (liprin beta 1) PPFIBP1	Hs.133207	-0.292881	-0.694712	-0.105045	-0.718622	-0.181237	-0.0736303	-1.45993	1.46317	-0.327565	-0.28558	-0.471106	-0.868945	-0.44882	-1.16072	-0.79326		0.0872428	-0.579256	-0.129909	-0.839455	0.246517		-0.242655		-0.319186	-1.11578	-0.462616	-0.831324	-0.044661	-0.888439	-0.898095		-0.0931458	-0.480491	-1.37618		-1.31206	0.287425	-1.17754		-0.650108	-0.573757	-0.650124	-0.792055	-0.761642	-0.674016
598	AI364655*299E1	AI364655			-1.04781		-0.488096	-0.406999						-0.801385				0.251801		0.189554	-1.14061									-1.23998						-0.652365	-0.861941
599	AI365424*299E5	Homo sapiens TR00071289_m (RAB4B), mRNA	Hs.279771	-0.0522404	0.469792	0.0467022	0.716265	0.36748	-0.349608	1.26978	0.160371		0.697092	-0.109319	0.0234676	1.09089	1.15439	0.770314		-0.137608	1.18551	0.586381	0.678057	0.793159				0.962869	1.39906	1.14651	0.693848	1.02789				0.425391	0.255809				0.312701	0.408113		0.813681	0.694436		0.312301	-0.0964985	0.23849
600	AI356363*299E9	stratifin SFN	Hs.184510	2.62165	-0.257508	6.33909	4.89387	4.94849	3.73622	2.19796	1.61901	1.91568	2.8286	3.42711	2.76978	2.42605	3.60345	3.69838	1.5341	0.913176	2.32029	3.85628	2.5267	3.16294	3.33787	1.16621	4.58986	2.91665	3.10901	2.95117	1.89269	3.54178	3.74961	3.73993	2.28743	3.49336	2.54753	3.29517	7.04586	1.35221	2.67436	1.82592	3.54332	1.3724	5.26991	2.95359	2.71979	2.49578	2.92661
601	AA827297*324E1	ESTs AA827297	Hs.124291	0.72055	0.593793		0.80612	0.349921		0.00913777				0.32611	0.495797					0.136651	-0.092977										1.3883	0.691111				0.751449									1.16002		1.85187	0.400469
602	AA857526 | AI732901*324E5	Data not found AA857526 | AI732901	Hs.124649	0.228822	-0.0838106	0.582306	0.0568952	0.653536	0.379867											0.0113907	-0.80736					-0.395691
603	AA863025*324E9	AA863025		-0.0380745																0.203462
604	N74677*325E1	HLA class II region expressed gene KE2 HKE2	Hs.205736	-1.23689	0.544896	0.139858	-0.476315	-0.321088	-1.29531	0.444762	0.0912077	-0.6282	-0.131015	-0.253489	-0.783135	-0.154472	0.0500393	-0.332451		-0.277076	-0.245629	-0.169154	-0.505257	-0.352782	-0.380002	-0.206469		-0.105944	0.394504	0.0730923	-0.394796	-0.0775671	0.099593	0.137897		-0.142456	0.0352612	-0.770477	0.338485	-0.680018	-0.991087	-0.429853	-0.981842	-0.817091	1.05589	-0.0948249	-0.457902	-0.296929	-0.463031
605	N79823*325E5	lipocalin 2 (oncogene 24p3) LCN2	Hs.204238	0.0615123	0.323753	0.36204	0.981563	0.0649533	-0.0665612	2.57161	1.44922	-0.0142568	0.730912	0.56147	0.64731	0.478896	0.71303	1.89536	0.830274	0.150707	0.215767	0.691868	0.369284	0.598247	-0.0777756	0.281735	2.20628	0.3148	0.209336	1.78484	0.205622	0.556195	0.696339	0.598849	0.633844	0.193897	0.88611	1.35559	0.476351	0.338317	0.19041	0.709729	1.18771	-0.109198	0.51403	1.77541	0.534045	0.122802	0.517758
606	H49983*325E9	S100 calcium binding protein A1 S100A1	Hs.515715	0.981775	-0.748903	-0.275395	0.0223194	-0.383504	-0.300654	0.0393411	0.150485	0.0191297	0.208929	0.281981	-0.262601	-0.634188	0.0484737	0.156065		-0.141359	-0.0141816	0.179519	0.420684	-0.213127	-0.32057	-0.0770456	0.0743809	-0.093295	-0.199494	0.481424	-0.380302	0.39643	0.0822958	0.620257	0.229962	0.258669	0.136864	-0.041861	-0.206053	-0.130834	-0.533627	-0.595053	-0.374937	-0.354849	-0.70231	-0.0133924	0.0271812	-0.184748	0.0388856
607	AI309311*326E1	AI309311		0.0951597	0.149336	-0.0924667	-0.564564	-0.570517	-0.509707	0.062933	-0.122893	-0.0943549	-0.239249	-0.668736	-0.512189	-1.48462	-0.14411	-0.0245934		-0.0134252	0.0446463	-0.140334	-0.357883	-0.368204	-0.307946	-0.382689	0.276998	0.177898		-0.934496	-0.165885	-0.751671	-0.136993	0.192702	0.220805	0.129997	0.357447	0.0602146	0.329961	-0.230581	-0.463144	-0.884852			-0.172868	-0.367416	-0.401373	-0.127593	-0.835068
608	AI337107*326E5	ZAP3 protein	Hs.159471	0.10556	-0.329567	-0.138493	-0.547375	-0.139888	-0.204755	0.0175326	-0.487012	0.445057	-0.0528812	-0.0667929	-0.00845113	-0.344819	0.0945595	0.288449	0.456004	0.29406	0.508992	0.33545	0.473796	-0.0871336	-0.150044	0.173489	0.297282	0.0874454	-0.409825	-0.846437	-0.0974271	-0.200396	0.390293	0.281922	0.760232	-0.475071	0.370899	-0.438495		0.0938019	-0.81724	-0.769822		-0.455382	-0.16152	-0.601817	-0.421479	-0.463912	-0.141464
609	AI263095*326E9	Homo sapiens mRNA; cDNA DKFZp434I0812 (from clone DKFZp434I0812); partial cds	Hs.263671	-1.08526	-0.363742	-0.404533	-0.710242	0.0858488	0.0274339	-0.885329	0.0423093	1.14047	-0.663018	0.252973	-0.274285	-0.394663	-0.322599	0.138139		0.290087	-0.659187	1.03466	-0.165186	0.63916	0.917701	0.084023	-0.0897391	-0.225635	1.6274	-0.67124	1.27693	-0.5094	0.096786	0.141073	0.243477	-0.698572	-0.0763083	-0.269665	-0.308697	1.65185	0.0405999	0.100146		-0.175183	-0.261971	0.634928	-0.571763	0.656594	-0.163956
610	AI149393*327E1	phosducin-like PDCL	Hs.9302	0.251169	1.2929	-0.458058	0.225594	0.157366	-0.663353	0.443334	0.886895		-0.167142	-0.724174	-0.983912			-0.258782		0.251675	0.251661	-0.374815	-0.620788	-0.263645		-0.281942		0.0449342	0.0828146	-0.356339	0.540289	0.110424		-0.63348	-0.190289	0.160101	0.422327			-0.577181	-0.647384	-0.478322		-0.348473				-0.246338	-0.447299
611	AI190747*327E5	DEAD/H (Asp-Glu-Ala-Asp/His) box polypeptide 8 (RNA helicase) DDX8	Hs.171872	-0.482137	0.203361	-0.285623	-0.208146	-0.760026	-1.14893	0.282237	0.380338	-0.0493269	-0.106846	-0.514036	-0.553413	-0.208022	-0.410868	0.17762	-0.0864828	-0.091743	0.370099	-0.0709291	0.0999511	0.0695213		-0.266046	-0.189788	-0.219535	-0.313262	0.354028	-0.228642	0.952982	-0.561179	0.0773953	0.0107369	0.613091	-0.355811		-0.94551	-0.835259	-0.710149	-0.581974		-0.734632	-0.148108	-0.742855	0.113754	-0.682376	-0.568049
612	AI055851*327E9	multiple PDZ domain protein MPDZ	Hs.169378	0.208357	0.642936		-0.981754	-0.238131	-0.613923	-0.576877	-0.199993	-0.0977106	-1.53752	-0.452698	-0.644054	-0.166969	-1.08402	-1.12184		0.167536	0.0475975	-0.603573	-1.50648	-0.197866	0.581081	-0.421362	0.116153	0.0923574	-0.335194	-0.123552	-0.123319	-0.915168	0.40803	-1.17817		0.0913278	0.0761497		-0.79462	0.168625	0.0931052	-1.5131		-0.726457	-0.151485	-0.633898	0.394096	-0.902695	-0.565512
613	AI306488*328E1	Homo sapiens mRNA; cDNA DKFZp434F062 (from clone DKFZp434F062)	Hs.150874																	0.215573																											0.161154
614	AI289238*328E5	AI289238		1.39687	-0.104773	-0.581782	-0.216635	-0.399826	-1.13877	1.32155	-0.365551	1.24601	0.0691323	1.11622	0.937559	-0.481066	0.767126		0.539449	0.293673	0.816082	0.524627	0.380214	-0.123234	-0.781315	0.757353	0.261433	0.3886	0.282844	0.86509	0.0402773	1.65586	1.61318	0.652056	1.11758	-0.532001	0.752486	-0.0159825	-0.84182	1.18457	-0.394053	-0.478979	0.531136	-0.393262	0.418939	-0.383161	-0.0239924	-0.864139	1.28435
615	AI300766*328E9	paired box gene 1	Hs.155644	1.58449	0.337688	-0.349297	0.0264423	-0.374897	-1.01494			1.16477	0.0501183		0.926706		1.21257		0.381107		0.906285	0.631437	0.793983	0.331562						1.46309	0.260917					0.251154	0.563612						0.399414	-0.176924	0.669373		0.140826	-0.920923	1.73703
616	AI263109*329E1	splicing factor, arginine/serine-rich 5 SFRS5	Hs.166975	-0.994161	-0.623775	-0.577893	-0.673306	-0.429716	-1.0003	0.222768	-0.416441	2.6801	-0.0697958	0.532538	-0.0292904	-0.169903	-0.786674	-0.16081	1.21407	0.326533	0.66105	-0.0586762	-0.763156	2.03395	-0.535888	-0.0389071	-0.13787	-0.180825	-0.828116	-0.588864	1.45122	-0.204347	-0.66458	-1.48896	1.08827	-1.02896	-0.503683	-1.14217	-0.800825	-0.801352	-0.569244	-1.34642	-0.889855	0.397592	-1.21681	-0.948724	0.947569	-0.59988	-0.355704
617	AI253257 | AI793252*329E5	solute carrier family 22 (organic cation transporter), member 1	Hs.183572	-0.722759	-0.571468			0.150805		0.622444	-0.25459	2.40247	0.258142	0.651566	0.0221237					0.491949	0.668308	-0.136704	-0.314176	1.68748	-1.0493												-0.185399			-0.276398	-0.522027	-0.940415
618	AI371158*329E9	dentin matrix acidic phosphoprotein DMP1	Hs.93465	1.45378	1.06538	1.18376	0.969358	-0.157998	0.921915	0.684872	0.211845	2.81604	0.368007	0.750398	0.656027	0.680495		0.678342		0.751419	0.418827	1.02143	1.44782	1.46967	0.570506	0.883757	0.455894	1.51522	0.393359	0.638575	-0.0399723	0.23793	2.06858	0.267273		0.994218	1.83762			0.367717	0.962868	0.434053			1.35993		1.67552		0.591505
619	AI187350*330E1	G antigen 1 GAGE1	Hs.251677	-3.75264	0.326933	-3.42316	-3.19097	-4.45281	-3.7769	-3.29417	-3.15722	-0.796959	-1.57454	-1.14193	-2.13826		-3.19819	-2.56155	-0.913668	-0.862647	-3.05452	1.79446	-4.04555	-3.03203	-2.3976	-1.86214	-2.61913	-3.82283	-1.99633	-2.64296	-2.55799	-2.81832	-3.10626	-2.50412	-2.94868	-2.84027	-3.5681	-5.70827	-2.58363	-4.2162	-2.28104	-4.58233	-2.85508	-3.53786	3.93489	-2.90298	-3.24089	-2.96556	-1.99879
620	AI220580*330E5	transcription factor 20 (AR1) TCF20	Hs.201668	0.288548	0.229705	0.0238385	-0.151403	-0.195744	-0.0958612	-0.1661	-0.044231	0.211821	0.416066	-0.084329	0.0143731	0.983312	-0.122551	0.550281	0.537263	-0.28923	0.303844	0.386252	0.383523	0.0127205	0.149326	-0.123634	0.0814296	0.163491		0.373028	-0.270577	-0.0331034	0.401199	-0.186341	0.367147	0.00363107	0.417655	-0.478201	0.266898	0.456838	0.0450771	-0.330596	-0.271869	0.150577	0.731532		0.255825	-0.0262301	-0.28631
621	AI286022*330E9	4-aminobutyrate aminotransferase ABAT	Hs.1588	-1.29211	0.776355		0.173208	0.269274		0.623595			0.312562	0.0298854		1.92808				-0.184587	2.137	0.688293						0.476344	2.36977	0.80871		1.23168	0.698096		0.434801	-0.280474	0.420912			2.04439		1.10309					0.590872
622	AI394426*331E1	mitogen-activated protein kinase 11 MAPK11	Hs.57732	0.772956	-0.31211	0.632106	0.826561	-0.217028	0.40155	-0.0704809	-0.0185226	0.529615	-0.105887	-0.381856	0.103268			0.0960437		-0.342894	0.149295	-0.0514502		-0.0943995	-0.723066	-0.0327066	-0.134864	0.479172	-0.0650557	0.588373	-0.0470815	-0.166073	-0.737592	-0.552325		-0.378607	-0.291565		1.095	-0.453857	-0.00404771	-0.540036	-0.123761	-0.099446	0.942742	1.10995	-0.00136486		0.429223
623	AI399875*331E5	G protein-coupled receptor kinase-interactor 2 GIT2	Hs.57734	-0.0884459	-0.0615436	-0.169052	-0.351681	-0.694684		-0.462342	-0.33137	-0.111661	-0.739035	-0.579515	-0.364645		-0.2991	-0.532548	-0.220031	-0.218259	-0.663295	-0.373177	-0.435729	-0.551569	-0.149556	-0.216217	-0.472812	0.186739	-0.352647	-0.21463	0.0805133	-0.948656	0.240774	-0.102998		-0.362862	-0.281923			-0.7392	-0.156733	-0.30289	-0.217989	0.167706	-0.377085	-0.225693	-0.859172	-0.175504	-0.470015
624	AI417983*331E9	involucrin	Hs.157091	0.770597		4.54078	3.4121	0.276716				4.17614	3.07347	3.95495	3.31333		3.85849				5.02885	4.57728	4.46257	2.42979			3.47065	5.78044	6.99816	4.74149		5.19682	5.63934	3.21731	3.93222	4.09057	4.68305				4.20738				3.22479		4.43848		4.78317
625	AI659114*332E1	tubulin tyrosine ligase-like 1 TTLL1	Hs.94958	0.307027				-0.279751	0.216222					-0.15402			0.739777				0.749524		0.345346	-0.263135			0.181039	0.167436		-0.885939		-0.347701			0.333127		-0.194064			0.598728			-0.183931		0.19458		0.175135
626	AI658727*332E5	microseminoprotein, beta- MSMB	Hs.183752	0.0540942	0.022713	0.656681		0.115993	0.0186902					0.976447		1.96809					0.0847325									0.352756	1.03539	-0.193985	4.26281		0.039204									1.13277			0.23157
627	AI686498*332E9	enhancer of filamentation 1 HEF1	Hs.80261	3.40893	-1.2023	-1.10739	-1.39404	0.0739131	0.103925	1.55215	0.705291	-0.312527	1.16926	0.330054	-1.11155		0.0717931	0.0295197	-0.346714		-2.189	0.285213	-1.03897	-0.0599679		-0.205795	1.88651	-0.0952245		0.793498	1.04921	0.173564	-0.307471	-0.317516	-0.0104098	-0.541902	0.933942	-2.49862		-1.75136	-0.651035	-1.19771	0.430025	0.122507	-0.970621	1.66299	0.0743245	-0.535712	-1.62895
628	AI653182*333E1	CHK2 checkpoint homolog (S. pombe) CHEK2	Hs.146329	-0.309324				-0.502325	-0.194111											0.0305712																							-0.10292		0.631369
629	AI654707*333E5	chromosome 20 open reading frame 1 C20orf1	Hs.9329	-0.983595	0.147476	-0.440107	-1.19152	-0.226577	-0.694575	-0.445123	-0.058475		-1.38307	-1.53157	-2.01691		-0.480569			0.286216	-2.51715	-0.46896					-0.576795	-0.143821	0.230886	-0.914173	-0.160567	-0.585404	-0.745428			-1.18799	-0.421293			-1.35495	-1.62616	-0.29442				-0.111414		0.500022	-0.258579
630	AI652382*333E9	dTDP-D-glucose 4,6-dehydratase TDPGD	Hs.12393	-0.737574	0.792243	0.0626374	-0.462303	-0.17114	0.158328	-0.145301	-0.420755			-0.574407	-1.31603	0.431712	-0.238006	-0.641459		0.0446559	-0.516577	-0.618904	-0.88115	-0.5062	-0.0868174	0.0943612		-0.236796	-0.201915	-0.484294	0.364187	-0.122123	-0.121508	-0.463156	-0.368433	-0.801966	-0.750682			-0.286356	-0.711388	-0.501499		-0.451847	0.117505	-0.0300631	-0.189607	-0.219684	-0.779361
631	AI688230*334E1	peptidyl arginine deiminase, type II PADI2	Hs.33455	0.473032	1.01359	0.956048	0.746025	0.570934		0.821889	0.232146			0.763701	0.270901					-0.0129317	0.244628	-0.0890857		1.48699						1.57775	1.75454	1.96483	0.940267				0.146888				0.592355	1.24772			0.717438	2.33682		0.921847
632	AI674081*334E5	KIAA0408 gene product KIAA0408	Hs.118744	0.607868	1.0928		-0.240576	-0.56696			0.657287									1.38571	-1.23709	-0.896765	-0.758832	-0.0153784		-0.448954				-1.18853	1.78808						-1.54294								-0.123702
633	R36116*334E9	synaptonemal complex protein 2 SYCP2	Hs.202676	0.020958	1.5116	-0.602438	-0.968128	-0.814751		-0.478447	-0.865537		-0.773743	-0.649822	-1.18015			-0.811671		2.88382	-1.28215	-0.518886	-1.3581	-0.62118		-0.31825		-0.363547		-1.59941	2.13909	-0.894011				-0.372029	-0.622587			0.118087		-1.41218		-0.368649	-0.508717	1.42832	-0.911199	0.227482	-0.0577164
634	R67014*335E1	FYVE-finger-containing Rab5 effector protein rabenosyn-5 Rabenosyn-5	Hs.167279				0.167665		0.990211	0.727941	0.27024	1.03892		0.507343			1.31198	1.06626		0.151035			0.869808	0.621894		-0.215366				1.26901		1.2416				-0.0364238					0.925586								0.954211
635	R74485*335E5	R74485		0.189846	0.293546	0.70973	0.190305	-0.0847613	0.355764	0.0687428	0.112411			0.315059		1.42005	0.62217			-0.0137624	0.826367	0.189713	0.173664					1.07181	0.932138	-0.0381961	0.898101	0.264767				-0.0317735	0.507231					0.682578		0.71602	0.734236		0.84944	0.456719	0.739764
636	T91161*335E9	interleukin 1 receptor accessory protein IL1RAP	Hs.173880	-1.35317	-0.179111	0.297122	-0.394802	0.290691		-2.54091	-0.841721	-0.958298		-1.28612	-0.472699	-2.98441	-1.52074	-1.65851		-0.0122475	-1.09559	-0.785977	-1.07759	-0.399808	-1.85642	-0.272452		-1.53499	-0.555812	-1.16836	-0.435492	-0.902929		-0.904222		0.349988	-1.23848			-1.39832	-0.422842	-1.5151	-0.938033	-0.664877	-0.60043	-0.898802	-1.14614	-0.0771804
637	H90415*JK200C1b	breast cancer 1, early onset BRCA1	Hs.194143	-0.797381	-0.146857	-0.45166	-0.664027	-0.22285	-0.629211	0.130509	1.04496	-0.421094		-0.494785	-0.136675	-1.19986		-1.5954		-0.206629	-0.642886	-0.303098	-0.903013	-0.305615		-0.599011		-0.691218		-0.587436	0.128987	-0.604781				-0.0412177	-0.032714			-1.3168	-0.413859	-0.780097		-1.06891	-0.420664	0.137981	-0.461449	-0.0670071	0.037909
638	AA443351*JK200C9b	v-erb-b2 erythroblastic leukemia viral oncogene homolog 2 ERBB2	Hs.446352	-1.01431	-0.55535	-0.651157	0.626306	0.0667305	-0.29607	3.79074	0.443612	1.92431	2.31337	1.585	1.67995		1.73412	2.21566		0.792782	2.05286	2.00243	2.27743	1.21662	2.56948	0.907194	0.755646	1.67041	3.07971	2.19127	2.40558	2.52846	1.20696	2.10788	1.89187	0.999718	1.14596	1.39058		1.94837	-0.0194544	-0.140606	0.687767	0.161472	0.123483	3.3323	1.52417	0.951064	0.777477
639	empty	SSC blank							-4.32043							-4.59083	-4.85483	-4.94728	-4.456	-3.2224						-4.23547		-5.63333	-5.31061	-5.09904	-0.632423	-4.1087												-4.56114	-5.09378	-5.044	-5.67776	-5.07033	-5.33604
640	AA862999*JK200G1b	calcium-sensing receptor CASR	Hs.435615	-0.0715529	-1.02076	-0.381037	-0.920452	-1.41494		-1.16602	-0.645135		-1.12233	-0.976363	-1.21563	-0.202497	0.479744	-0.943353	-0.984461	-0.00155773	-1.37069	-0.156793	-0.920731	-2.06591	-1.49857	-0.649366	-0.530828	-0.834613	-0.383124	-0.2237	-0.515741	-0.60513	1.42929			-0.484367	-1.26687	-1.28452	-1.9701	-1.50207	-1.3587	-0.828169	-0.993363	-1.43213	-0.0130551	-0.345593	-0.341122	-0.591249	-0.0246883
641	AA877845*JK200G9b	LIM domain kinase 2 LIMK2	Hs.474596	-0.102501	-0.599811	0.321434	0.675561	-0.117733		-0.0922896	-0.729403	0.345145	-0.145543	0.152574	-0.0426348		0.0587206	1.05272	-0.132536	-0.323155	0.221256	0.297087	0.307188	-0.529619	0.547409	0.421189	0.0702154	-0.3882	0.117174	0.203995	-0.151658	0.201912	-0.454587		-0.836448	-0.0163889	-0.252683	-0.654245	0.194533	-0.622729	-0.0912058	-0.515913	0.508608	0.0249112	0.316964	-0.108327	-0.203465	-0.638151	-0.678978
642	AA040703*JK200G17b	profilin 2 PFN2	Hs.91747	0.910092	-0.819387	0.198459	-0.80836	-0.752541	0.767669	-0.0200839	-0.944655	0.0631807	0.430808	-0.090848	-2.13813	-0.421607	-0.313488	0.215018	-0.39097	-0.30271	0.0521784	-0.304291	-0.75442	-2.12467	0.642743	1.14666	-1.20789	-0.646047	-0.5931	0.0253637	-0.497135	-1.40902	-1.93551	-0.230969	-0.622187	-1.76057	-0.930227	0.0477496	-0.213624	-0.85402	-1.23351	-3.08591	-1.47573	-1.53227	-0.0484232	0.221611	-0.20995	-0.198119	-0.460018
643	empty	Data not found EMPTY
644	empty	Data not found EMPTY
645	empty	Data not found EMPTY
646	T43086*JK200O1b	T43086				0.660345				1.3012			0.142388								0.423945					0.0154097	0.863911									0.757476	0.109694
647	empty	Data not found EMPTY
648	empty	Data not found EMPTY
649	AA192553*1C1	uncoupling protein 3 (mitochondrial, proton carrier) UCP3	Hs.101337						0.0700162						0.8093					0.933137				-0.791992		-0.0763221																							0.0729599
650	T50788*1C5	UDP glycosyltransferase 2 family, polypeptide B15 UGT2B15	Hs.332172		0.0256437	0.98421	-0.0961501	0.407889		4.18964			1.44877	0.86401	1.25804			0.864707		0.160824	0.141405	0.329107	2.47809	1.5749												1.87679	0.383723				2.03979	1.5619			1.20095
651	R17676*1C9	plexin A0	Hs.322844	-2.24563	-2.54915	-2.50556	-2.27177	-2.08619	-2.01765	-2.22311	-1.66448	-2.06493	-1.11285	-2.49907	-1.92587	-1.14368	-1.86178	-1.25108	-2.34401	-1.31396			-1.58353	-1.3493	-1.44338	-1.27619	-2.38141	-2.1771	-2.38381	-1.15532	-0.509356	-2.26365	-1.40536	-2.03673	-2.35587	-1.7932		-2.16455	-2.35738	-1.53169	-1.95085	-1.96318	-2.11595	-1.49308	-2.42098	-2.33678	-1.77644	-1.81898	-3.13693
652	AA456616*2C1	ribosomal protein S5 RPS5	Hs.76194	1.12908	-0.232886	0.395136	-0.441815	0.583558	-0.63815	0.728191	0.491248	-0.143567	0.776695	-0.0244297	-0.312045	-0.101239	-0.188473	-0.271113	-0.7539	0.0629397	-0.124778		0.145857	0.896052	0.476507	0.351174	0.354812	-0.0825525	0.327161	0.578455	-0.176236	0.157708	0.385339	1.03095	0.263812	0.412906	-0.120204	-0.158029	0.530021	0.0430493	0.469518	0.565622	-0.174096	-0.606616	0.36144	1.15079	0.00202924	0.47087	-0.406726
653	AA464743*2C5	ribosomal protein L21 RPL21	Hs.184108	-1.38194	-1.19937	-1.18975	-0.433402	-0.834606	-1.17236	-1.58214	-1.03567	-0.481467	-0.905586	-0.598211	-0.893477	-0.146388	-0.621182	0.422025	-0.540603	-0.102394	-0.0684949		-1.03626	0.0420754	-0.474524	0.5426	-0.956546	-0.549038	-1.22583	-0.59697	0.245092	-0.263488	0.179122	-1.03295	-0.48664	-0.921308	-0.827295	-1.52703	-0.684601	0.125352	-0.636382	-1.33755	-1.17038	-0.510571	-0.95592	-0.799771	-0.450771	-1.15155	-0.848557
654	H84114*2C9	retinal outer segment membrane protein 1 ROM1	Hs.281564	-0.751435	-0.757951	-0.802592	-0.511646	-1.11076	-0.682671	-0.400899	-0.0349425	-0.792621	-0.78694	0.210705	-0.0598946	0.145818	-1.18276	-0.325572	-0.933859	-0.329346	-1.10143		-0.794442	-0.519232	-0.0385678	-0.498752	-0.130325	-0.656373	-0.264497	-0.381669	-0.566895	-0.843114	-0.451662	-0.360445	-0.455167	-0.786563	-0.196992	-0.324142	-0.300135	-0.108598	-0.282892	-1.03165	-0.638845	-0.831357	-0.409618	-0.613023	-0.0825561	-0.185426	-0.458146
655	R89808*3C1	phosphotidylinositol transfer protein PITPN	Hs.79709	0.458651	-0.138693	-0.444119	0.0927147	0.254528	0.475448	0.52757	-0.214953	0.664665	-0.121485	0.148518	0.153252		0.129708	0.0341368	0.258684	0.177876	0.898644		1.0969	0.300443	-1.34366	0.524646	0.409521	-0.16855	-0.849585	0.559517	-0.25866	0.562319	0.286401	1.32946	-0.133744	0.886522		-0.358911	0.359483	0.527432	-0.143841	0.0369646	-0.223689	0.0775648	0.29373	0.168	0.208588	-0.773676	-0.659515
656	R31938*3C5	Opiod receptor, kappa 1 OPRK1	Hs.89455	2.09027	1.12468	2.18125		1.68176	0.64586	0.901015			0.531878	3.85812	2.21502	3.22001	6.21831	1.63256		-0.169445	0.457552	0.708689	1.9079	0.970941	1.06412	1.18935		1.51711	0.929282			2.42182		1.55096		0.752176		2.2532						2.57293	2.36625				3.4153
657	T52484*3C9	nerve growth factor, beta polypeptide NGFB	Hs.2561	-0.945391	-1.12534	-0.196714	1.30623	-1.64037	-0.639267	-1.77935	-1.1762		-1.62705	0.000917291	1.77668			-0.611506		-0.234084	-1.63299		0.911484	-1.34091		-0.847095				0.028452		-0.862362		0.522988		0.16989	0.427206	0.228973	-1.4249					0.110448	-1.14589			-1.43668
658	H82442*4C1	inhibitor of DNA binding 2, dominant negative helix-loop-helix protein ID2	Hs.180919	0.0486659	-0.668556	0.418324	-0.515213	-1.26169	-0.55081		1.54984	1.20004	0.214588	0.698827			-0.0229274	-0.803937	0.757277	0.608593	-0.472508		0.785627	0.927791	0.995426	0.615416		0.250083	-1.29298	-0.126079	-0.166899	-1.57734		-0.0957639		-0.347108	1.76088	1.05427		-0.808085	0.51464			0.0982375	-0.377584		-1.10709	-2.19782	-0.198231
659	H78386*4C5	interleukin 1 receptor, type II IL1R2	Hs.25333	-0.0506254	-1.18647	1.61314	0.534097	1.58031	0.884685	1.52793	2.26509	0.783292	1.5673	1.05399	0.260277		0.655892	0.248498	-0.0403722	0.222987			1.63161	1.12726	1.47614	0.682418	1.53619	0.865555	-0.19923	1.69309	0.763761	0.527511	1.68741	1.31228	0.211104	1.4173		0.384964	2.59531	0.197608	1.34479	-0.918929		-0.707363	1.02578	-0.415811	-1.56805	1.34672	-0.497172
660	W72748*4C9	guanylate binding protein 2, interferon-inducible GBP2	Hs.171862	0.178396	-0.412412	1.44255	0.991938	3.15925	0.641433	2.59971		2.36249	2.28783	1.61083	3.41403			1.71288	0.228312	0.498718	1.539	1.03971	2.08935	2.25101	1.14528	0.879019		1.90474	3.26112	3.28545	3.63858	2.09138	2.97006	2.27459	0.913481	0.528518	1.27148	1.31382	2.59701	0.829399	2.18114	1.56308		3.16636		2.02318	2.27251	1.04297	1.26593
661	W68291*JK200B1a	integrin, beta 2 ITGB2	Hs.375957				2.32368	1.51406	-0.0173229		0.164788		0.0582865						-0.101344		-0.629217					-0.0285803			1.2835	0.59983						-0.283542						2.05865		2.59197
662	AA434397*JK200B9a	integrin, beta 5 ITGB5	Hs.13155	0.567509	-0.284213	-0.311322	0.0824249	-0.590389	-0.262458	-1.82473	0.328528	-2.09028	-0.0841025	-1.30013	-1.4709		-1.18331	-1.29506	-0.398689	-0.507031	-0.831769	-0.472436	-0.651847			-0.42984		-1.86342	0.0359925	0.335811	-3.41459	0.207148		-0.104894		-0.113238	-0.790816	-1.73345	-0.065464	-2.25533	-0.203734	-1.40607		-2.1506	-1.0955	-0.821701	-1.50654	-0.303079	-1.60395
663	T64134*JK200B17a	small inducible cytokine subfamily A (Cys-Cys), member 12	Hs.11383	1.58619	-0.0688823	0.500108	1.09807	3.33743		1.79646	2.4529		0.964335	-0.0902338	0.692032			0.297496	-0.830558	0.0860451	0.926291		0.357101			-0.170731		0.316954	1.48271	0.523992		0.0861402		0.540715		0.445123	1.34281	2.33377	0.742621	1.96084	1.58369	0.655077		1.1635	1.0932		0.0959279	1.18102
664	AA676797*JK200F1a	cyclin F CCNF	Hs.1973	-0.836116	0.987532	-0.175264	-0.210737	-0.400656	-1.47037	0.324353	-0.0524459		-0.128517	-0.123988	-0.571753			-0.305816	-0.0145646	-0.336657	-0.493593	0.313653	0.228724	-0.432996	-0.253226	-0.0908423		-0.26954	0.670448	0.290323	-0.0970687	-0.0569477		1.09323		0.0394485	0.223921	-0.59424	-0.572275	-0.472036	-0.579583	-0.0287012		-2.50269	-0.350721	-0.114129	0.329457	0.208104	0.021666
665	AA676957*JK200F9a	catenin (cadherin-associated protein), alpha 1, 102kDa CTNNA1	Hs.445981	-0.509079	-0.0247521	-0.321751	0.0789487	-0.201626	-0.546801	0.783531	0.368146	0.580168	0.655295	0.575199	0.294455	0.327972	0.660771	0.404951	0.731041	0.227693	0.633051	0.143895	1.01056	0.892801	-0.242553	0.776328		0.66297	0.0468692	0.5823	0.39269	0.627799	0.471394	0.54866	0.527066	0.312608	0.394788	0.678314	0.437859	0.444921	-0.350053	-0.00259834		-1.05625	-0.663786	-0.279389	0.00686004	0.0412306	-0.339128
666	W63749*JK200F17a	B-cell CLL/lymphoma 2 BCL2	Hs.150749	0.571728	0.284479	0.996989	0.914216	-0.193905	0.203592	0.474056	0.463941		0.366414	0.159308	0.578588	0.310198	-0.317851	0.988745	0.340273	0.163638	0.070318	0.38809	0.872317		0.132469	0.988882		0.438432	-0.279263	0.855347	-0.5113	-0.28728	0.576033	0.266716		0.664655	0.319159	-0.380872	0.236403	-0.0244901	0.438021	0.17863		0.256017	-0.302178	0.397723	1.34472	-0.283562
667	AA443351*JK200J1a	v-erb-b2 erythroblastic leukemia viral oncogene homolog 2 ERBB2	Hs.446352	-0.703059	-0.722018	-0.796249	0.582503	-0.0217308	-0.12265	3.78286	0.472886	1.73671	2.24854	1.44936	1.79617		2.06059	2.23379	0.826873	1.33685		1.9098	2.50944	1.2162	3.03944	1.00968	0.656585	1.63128	3.19334	2.46225	2.76463	2.60484	1.39497	2.23694	1.82177	0.882279		1.45544	-0.762434	2.02789	0.239722	-0.253354	0.95842	0.180167	-0.0110796	3.78028	1.75337	1.22107	0.989967
668	H90415*JK200J9a	breast cancer 1, early onset BRCA1	Hs.194143	-0.835449	-0.0845532	-0.585141	-0.823693	-0.179033	-0.569938	1.12559	1.02219		-0.196693	-0.351242	0.367239			-0.0873958	-1.3865	-0.420558	-0.215893	-0.0475938	-0.0807724	-0.188396	0.368615	-0.705083		0.0664012	0.611452	-0.032271	-0.505453	-0.0157058	-0.227346	-0.151145	0.0538886	1.27275	0.12305	0.787332	-0.493535	0.0810511	0.0146537	-0.794104		-1.59653	-0.529522	-0.386591	-0.132375	0.176349
669	empty	SSC blank
670	empty	SSC blank
671	empty	Data not found EMPTY
672	empty	Data not found EMPTY
673	AA037014*5C1	solute carrier family 21 (prostaglandin transporter), member 2 SLC21A2	Hs.83974	2.07633	0.598511	1.56106	1.53199	4.35234	1.59804	1.13268	1.1712		0.769598	0.640783	1.08347	1.96319	2.1627	1.71031	1.52481	0.127537			1.99131		0.805928	0.899171	1.80075	1.16301	1.06102	1.24935	1.1555	1.61128	1.05265	1.77702	1.01286	1.04444		1.92625	1.76237	0.815913	1.3339	1.63235	2.0177	1.8272	1.08604	2.26784	2.31949	1.4693	1.03785
674	N69672*5C5	glycosylphosphatidylinositol specific phospholipase D1 GPLD1	Hs.272529	0.0683777	0.280101	0.449913	0.392391	0.558946	0.0226249	0.443193	0.533648	0.617092	0.906044	0.54083	0.452825	0.84903	0.324867	0.154633	0.546739	0.351817			1.03787	0.779034	0.603959	0.778908	0.565699	0.248178	0.0725751	0.871931	0.555453	0.575974	0.491084	0.905413	0.0660637	0.586845		0.400238	0.797767	0.722055	0.401195	1.52052	0.813267	-0.212153	0.415367	1.09125	0.33972	0.389333	0.117433
675	AA430574*5C9	paxillin PXN	Hs.102497	-0.630787	-1.11114	0.822801	-0.897596	-0.0160296	-0.620326	0.261125	0.946441	0.546332	0.341749	0.0469608	-0.0137316		0.110711	0.25758	0.314351	-0.0551908		0.722925	1.24005	0.858244	1.07961	0.775091	0.68573	-0.101162	-0.317306	0.972272	-0.0573593	0.680826	-0.226416	0.52335	-0.420588	0.874496		0.756445	0.296792	0.46139	-0.614673	1.08282	0.821301	-0.499518	-1.31524	-0.246876	0.600986	0.455854	0.438462
676	H15077*6C1	KIAA0350 protein KIAA0350	Hs.23263	2.38875	-0.140894	0.0318823	0.768361	1.41819	-0.704137	0.675338	2.07279	0.464308	0.340859	0.179266	0.385973	0.777562		0.231305	0.371137	0.405322			1.15533	0.139851	0.209595	0.429135	0.224652	-0.34287	-0.582438	1.19032	-0.121765	0.301868		0.852116	-0.455912	0.272735		0.378922		0.449549	0.0779131	0.271671	0.637556	0.051274	0.429511		-0.154371	-0.0192598	-0.42786
677	R00035*6C5	KIAA0336 gene product GCC185	Hs.278671	0.160304	-0.380632	-0.542662	-0.311623	0.0897927	0.177665	0.090122	0.772119		-0.0308268	0.0665778	1.05355			-0.305514	1.23606	0.714978			-0.0855771	-0.228478	0.546462	0.596112	0.667926	0.124392	-0.203249	-0.158828	-0.0460237	-0.0531808		-0.0988545	0.346018	0.111556		-0.0925566	-0.139201	-0.699335	0.452772	0.444623	0.240014	1.24765	-0.0501402		0.477677	0.0456187	0.5969
678	N74380*6C9	KIAA0321 protein KIAA0321	Hs.8663	0.428996	-0.428599	0.500636	0.48237	0.345999	0.748064	1.67829	0.785993	0.615252	0.180032	0.252869	1.55028			-0.0524118	0.616637	0.331146		0.176452	1.43981		-0.142643	0.133262	-0.0231093	-0.0744912	-0.15458	0.270997	0.325669	-0.224963	0.442869	0.39007	-0.45382	0.351938		0.766944	-0.0296465	0.147398	0.217728	0.801552		0.216177	-0.335379		0.808338	0.0956246	0.0545734
679	H66484*7C1	SP140 nuclear body protein SP140	Hs.309943	0.200275	0.47396	0.348402	0.757769	0.658299	0.478327	0.580886	0.800511	-0.354654	0.251167	1.02101	2.06115			-0.451323	0.0791	0.347856			0.826007	1.24265	0.138036	0.0361944		-0.551637	-0.230493	0.309012	-0.134443	-0.446143	0.780461	0.214386	-0.533907	0.516098		0.792689	0.544075	0.238632	1.70146	1.27775		1.32046	0.335483		-0.188685	0.344559	0.162505
680	AA098980*7C5	protein kinase C-like 1	Hs.69171	-0.0842163	0.209858	0.548888	0.172861	0.0874232	0.228861	0.199556	0.51539	0.736033	0.403337	0.553916	0.78661		0.00725075	0.113636	0.768372	0.52488		0.147273	0.805729		0.701029	0.825562	0.598621	0.197811	-0.555264	0.307629	0.415418	0.507411	0.302014	0.141471	0.208129	0.339379		0.422787	0.273064	0.500497	0.477946	-0.19749	-0.0141818	0.33	0.0493957	0.451254	0.648307	0.344783	0.634092
681	AA146655*7C9	HLA class II region expressed gene KE4 HKE4	Hs.278721	-0.183202	-0.107632	-0.495493	0.0693364	-0.74604	-0.999825	0.275002	-0.343473	-0.327782	-0.311861	-0.475263	-0.641349	-0.482987	-0.267932	-0.328681	-0.722404	-0.601697		0.0572381	0.148764	-0.148815	0.157116	-0.343766	-0.734726	-0.881289	-0.222155	0.241121	-0.0626635	0.0242438	-0.684067	0.303362	0.0385962	-0.429144		0.212961	-0.432183	0.3382	-0.465556	0.187809	-0.518728	-0.14706	0.143933	0.623628	-0.0712628	0.216219	0.0287093
682	W58236*8C1	carnitine palmitoyltransferase II	Hs.274336	0.0654613	0.15279	0.0132529	0.129703	0.694063	-0.769925	0.742186	0.732375		0.450842	0.452008	0.116257		-0.215506	1.3115	0.0635084	0.325705		0.232467	1.55012		0.877809	0.958982		0.0695241	0.253262	0.590198	-0.0308191	0.295805		0.708262		0.229794		0.682259	0.404785	0.653447	0.394613	0.696647		-0.0933618	0.241575	0.398763	0.102763	0.209185	0.368943
683	R22790*8C5	cAMP response element-binding protein CRE-BPa H_GS165L15.1	Hs.149	0.392252	0.609617	1.75255	0.562967	0.238285	2.18054	0.102246	0.263776		-0.251437	0.379747	-0.0643937		1.38717	0.861382	0.189205	-0.0524039		-0.0217668			0.329382	0.47634	0.69751	1.02403	0.929025	0.606415	0.206708	0.118427	0.25525	0.594674	-1.47631	0.345166		0.406524	0.477824	-0.076302	-0.170467	-0.0649974		1.1962	1.1289	1.36765	0.982936		0.776379
684	H68107*8C9	butyrophilin, subfamily 2, member A1 BTN2A1	Hs.169963	0.205992	0.0755946	0.0272287	-0.00138593	0.103092	-0.259647	0.788182	0.116806	-0.0357859	-0.170074	0.262815	0.341908	0.203601	0.0315323	-0.0127609	0.44144	0.0221176		0.390759	0.273763	0.279305	0.176385	0.43851	0.271978	0.0395529	0.0409228	0.302551	0.00769048	0.121095	0.00597367	0.26289	0.140097	0.00541721		0.180553	0.101304	-0.060654	0.106143	0.411742	0.0508746	0.806577	0.125965	0.278103	0.518079	0.581571	0.205569
685	R94725*45C1	ESTs R94725	Hs.35354	0.308971			-0.578486	-0.236483		-0.880378	0.338995	-1.0991	-0.532455	-0.857977	-0.805599	-2.00644	0.474302	-1.08778		0.0149054				-1.41563	-0.921197			-0.734764	-0.514984	-2.1598	-2.38144	-2.18766	0.0656918	-0.193951	-1.6813				-0.452584	-0.327294	-0.149205	-0.87341		-1.21155	-0.642	-2.25651	-2.05603	1.21479	-1.5864
686	R94923*45C5	R94923	Hs.35395	0.76471			0.155349	0.261506	0.937619	-0.0969278	-0.0403626		0.00191295	0.462032	-0.0215075	0.168666		-0.123246	-0.219372	0.247396			0.720287	0.0205352		-0.653506	-0.274721	0.454571	0.222769	-0.387248		-0.514215	0.141115	0.336301	-0.648406					0.678635	0.936714	0.394095		-0.0716657	-0.178729	-1.0914	-0.218131	0.163055	0.785349
687	R95770*45C9	ESTs, Weakly similar to hypothetical protein FLJ13241 R95770	Hs.35455	0.697188			0.536302	0.368752	0.0473981	-0.227782	0.0279032		0.156458	0.120768	0.704572			-0.0471933	0.661639	-0.0406131			0.307252	0.650789	1.97529	-0.19875	0.590252	0.577265	0.186376	-0.0104443	-0.070129		0.215725	0.297708	-0.513541				-0.157198	1.04951	0.565685	0.748858		-0.225621	-0.16795	-0.292598	0.388346
688	H66839*46C1	ESTs, Moderately similar to hypothetical protein FLJ20234 H66839	Hs.268916	0.145026			-0.505011		-0.326007	-1.4132	-0.360383		-1.43506	-0.929951	0.505002	-1.01545	-0.245342		-0.00278814	0.14928			-0.043677	-0.824297		-0.502882		-0.816023	0.231902	-1.7275	-0.337807	-1.00726	-0.228901		0.747374	-0.0644081		-0.84458		-0.679397	0.897084	-0.106295		0.658194		-0.357662	-1.00709
689	H53878*46C5	Homo sapiens cDNA FLJ37623 fis, clone BRCOC2014013. H53878	Hs.268919	0.000507182	-0.0912137		-0.566013	-0.416578	-0.316569	-0.845689	-0.385812		-0.599325	-0.618264	0.627451	-0.270204		-1.06767	-0.0798141	-0.0439793			-0.689013	0.0918808	-0.905478	-0.800854	-0.272311	0.355283	0.100908	-0.336795			-0.84123		0.0407106	-0.376124			-0.24522	-0.342042	0.650664	-1.09353			0.0666605	-0.235191	-0.772613		-0.172932
690	H53829*46C9	Homo sapiens full length insert cDNA YQ85G03 H53829	Hs.36823	-0.102701	0.449286		-0.54975	-0.301236	-0.327991	-1.26451	0.465048		-0.275821	-0.271198	0.257036	-0.837976	-0.610376	0.327531	0.363716					-0.170054	0.0493187	-0.763004	0.153115	-0.217392	-0.924524	-1.12193	-0.44401	-0.948695	-0.735331	-0.907144	-0.375601	-0.0621154		-0.527433	-0.338482	-0.0255826	0.226812	-0.709783	-0.245182	0.22692	-1.05213	-1.28008	-0.51484	0.32542	0.116066
691	W68291*RJ200 AC1	integrin, beta 2 ITGB2	Hs.375957	0.363315	-0.737458		-0.463578	-0.0600477	0.162091	-0.517494	0.571387	-0.209762	0.0576635	-0.505169	-0.706679	-0.594365	-0.575181	-0.758544	-0.208103	-0.208448			-0.0537445	-0.469551	-0.454005	-0.105226	0.0659344	-0.276795	-0.00863683	-0.537908	-0.51545		0.240635	-0.412293	0.235683	-0.0670997		-0.699663	-0.048771	0.13	0.129989	0.0366206	0.10161	-0.25383	-1.13635	0.0566236	-0.318199	0.324562	-0.776426
692	AA434397*RJ200 AC5	integrin, beta 5 ITGB5	Hs.13155	0.642933	-0.315253	-0.124137	0.0671617	-0.472739	-0.335147	-1.24241	0.33035	-0.640525	-0.0430328	-1.04399	-1.04419	-1.3006	-0.633403	-1.09761	-0.807149	-0.425753			-0.153721	-0.284425		-0.888468	-0.746119	-1.46536	0.0589459	0.00779587	-2.6452	0.0717616	-0.197055	0.219068	-0.83472	-0.0853055			0.171693	-0.729636	-0.503207	-0.943269	-0.341291	-1.0126	-0.541991	-1.12108	-1.29881	-0.275266	-1.05093
693	T64134*RJ200 AC9	chemokine (C-C motif) ligand 13 CCL13	Hs.11383	-0.0672385	-0.806448	-0.868358	-0.124863	-0.283087	0.299227	-1.46294	-1.13159	-0.664168	-1.37256	-1.74526	-1.3757	-1.50658	-0.72719	-0.901082	-1.29675	-1.06021			-0.632076	-0.727873	-1.22145	-0.725601	-0.952941	-1.39273	-0.477902	-1.666	-1.95633	-0.172145	-1.35776	-1.11684	-0.975373	-1.30958		-1.21159	-0.225283	-0.753145	-0.0313885	0.340581	-0.165254	-0.929155	-1.3598	-1.13061	-1.6157	-1.22701	-0.345631
694	AA676797*RJ200 AC1	cyclin F CCNF	Hs.1973	-0.868069	1.16885	-0.16491	-0.506493	-0.595997	-0.620312	0.00211056	-0.607499		-0.283557	-0.240168	-0.480001	-1.07084	0.12408	-0.201146	-0.904272	-0.0615601			0.626419	-0.653345	0.321223	-0.393273	-0.727443	-0.406584	0.620262	-0.195247	0.0156704	-0.212865	-0.110245	1.07218	-0.200327	-0.293754		-1.18922		0.127563	-0.604447	0.0638132			0.0133614	-0.504327	-0.35845	-0.041214	-0.131194
695	AA676957*RJ200 AC5	catenin (cadherin-associated protein), alpha 1, 102kDa CTNNA1	Hs.445981	-0.416781	0.0388329	-0.277938	0.0342138	-0.133324	-0.327113	0.919035	0.471869	0.284946	0.650326	0.454735	0.445265	0.32758	0.897866	0.444704	0.726153	0.148977			1.00478	0.466291	-0.133827	0.62747	0.475473	0.479095	0.156549	0.461225	0.633074	0.524108	1.1217	0.714412	0.798652	0.465316		0.61291	0.339977	0.293271	-0.399475	0.0461767	0.12708	-0.613266	-0.628576	-0.528611	-0.0512035	-0.00229779	-0.151302
696	W63749*RJ200 AC9	B-cell CLL/lymphoma 2 BCL2	Hs.79241	0.0761828	0.531344	0.0993669	0.192637	-0.327673	0.389433	0.50973	-0.0857105	-0.23584	0.156047	-0.47593	0.838856	0.693371	0.523737	0.589941	-0.188208	0.293718				-0.399174	-0.128544	0.475921	-0.625821	0.138075	-0.661773	-0.452355		-0.825315	0.197521	0.634035	-0.563563	0.45716		-1.82777	0.174228	-0.172288	-0.0929654	0.722865	0.27739	0.575882	-0.176168		0.505745	-0.174353	-0.214072
697	H07878*9C1	G protein-coupled receptor 19 GPR19	Hs.92458	-0.762905	0.403039	-1.56377	-1.66652	-1.5701	-0.900091	2.01822	-1.27801	0.934279	0.729793	0.559601	-0.187711	-0.328615	0.0512078	2.2447	-1.51165	-0.177857			0.747658		2.1209	0.479689	-1.70232	0.377637	1.05701	0.718914	1.54991	1.72549	-0.429218	1.15643	1.44716	-0.62571		1.19571	-1.98846	-0.408729	-0.96213	-0.25581	-0.10005	-1.71652	-0.844602		-0.675194	-1.03326	0.568222
698	N95418*9C5	FK506 binding protein 8, 38kDa FKBP8	Hs.173464	-0.798782	-0.609137	-0.586133	-0.52427	-0.841523	-0.811822	0.302974	-0.755561	-0.430839	0.232469	-0.569223	0.45532	-0.174674	-0.648092	-0.505622	1.60585	2.33849			2.06714	1.69646	-0.471005	-0.28494	-0.951408	0.649424	-0.755792	2.32838	0.898452	0.27555	-0.73826	-0.641855	0.20406	1.59445		-0.160352	0.0469338	1.02837	0.180925	-0.403399	-0.890688	-0.690475	-0.358636	-0.17398	-0.112141	-0.915442	2.06311
699	AA406285*9C9	DR1-associated protein 1 (negative cofactor 2 alpha) DRAP1	Hs.295362	-0.0300747	0.374768	-0.26462	-0.408491	-0.0591363	-0.140739	0.0589189	-0.178094	-1.03197	-0.283499	0.133401	-0.332397	-0.686954	-0.543351	-0.305241	-0.65546	-0.935083			-0.150327	0.11237	-0.150362	-0.299209	-0.794248	-1.30772	-0.132886	-0.0924064	-0.71161	-0.353017	-0.692225	-0.319757	-0.463217	-0.518927		-0.404189	0.399362	-0.203	-0.252203	0.0592708	-0.136046	-0.547722	-0.229233	-0.23208	0.113317	-0.037305	-0.328988
700	R87964*10C1	integrin, alpha 8 ITGA8	Hs.91296	2.03767	-0.062705	0.199301	-0.158098	-0.458466	-0.36579	-0.0806364	-0.600019	-1.37168	-0.0163098	-0.3395	-0.687653			-0.0467878	0.290061	0.223081			0.798682		-0.83849	0.379303		0.157391	-0.977094	-0.0991786	0.173168	-0.178214		0.792527		0.303466		-0.0411326	0.283341	0.813042	-0.744764	0.516525		1.02294	-0.952856	0.594821	0.795506		0.699166
701	AA464196*10C5	hyaluronoglucosaminidase 1 HYAL1	Hs.75619						-0.704354	-0.972006	-0.360439		-1.10494	-1.70438	-1.10905			-0.490704	-1.26962	-0.101344			-0.137367		-3.34022	-0.522651	-1.45469	-1.66084	-1.65088	-0.934885	-0.472119	-1.63129	-0.784532	-0.847653	-1.39309				1.83305	-1.33577		-0.89937				-1.14679
702	R16667*10C9	spectrin SH3 domain binding protein 1 SSH3BP1	Hs.24752						1.19207	0.12279	0.369358	0.729613	1.1177	0.905214	1.47139	0.884486	0.324067	0.829105	1.13581	0.4639			0.917796	1.20877	1.37718	1.13647	0.835901	0.9722	0.664572	0.842846	0.551381	0.673652	1.19744	0.259227	0.808374			0.127081	1.00045	1.34749	1.26059	0.603342	0.102449	0.772185	1.72953	0.804338	0.88517	0.440294	0.989945
703	T72628*11C1	splicing factor 3a, subunit 1, 120kDa SF3A1	Hs.288883						-0.147978	-0.172885	-0.382139	-0.612518	-0.110621	0.40359	0.105845	-0.712316	-0.232937	-0.534887	-0.203603	-0.309083			-0.39258	0.162909	-0.0139484	-0.119712	-0.242588	-0.179561	-0.169552	-0.444775	0.197139	-0.391102	-0.544955	-0.23551	-0.188578			-0.209179	0.0111543	-0.505382	-0.0131137	-0.178579	-0.400136	-0.612166	-0.500762	-0.812293	-0.156722	-0.209113	0.0904152
704	AA447793*11C5	purine-rich element binding protein A PURA	Hs.29117						0.747389	0.083584	0.397945	0.952127	0.439508	0.86382	0.965536	0.610601		0.660083	1.52849	0.564703			0.541426	1.00162	0.420336	0.846738	0.0729098	1.09876	0.161792	0.645552	1.36644	1.34196	0.218934	0.465955	0.339111			0.384176	0.768688	0.421213	0.612718	0.107356	0.155917	0.17988	-0.284903	-0.412366	0.883114	-0.801772	0.322298
705	AA456101*11C9	phosphoinositide-3-kinase, class 2	Hs.32971						0.30279	0.352375	0.0499057	0.471386	0.91516	0.789555	0.394613	-0.218268		-0.210599	0.227269	0.0685855			-0.062878	0.134497	0.569387	0.705074	0.0680305	0.588067	-0.351099	0.231109	-0.728735	-0.297284	-0.060952	0.204508	-0.320156			0.0337505	0.0640155	0.278725	0.0986549	-0.219004	-0.182305	-0.583541	0.366909	-0.373973	0.284866	-0.155429
706	N70285*12C1	glycophorin A (includes MN blood group) GYPA	Hs.108694							0.852629	0.781523			0.461257	0.867783			0.10315		0.238021						0.466629		1.09235	0.724108					2.1587					1.22315	1.82754			-0.154903
707	R33642*12C5	glutathione S-transferase pi GSTP1	Hs.226795						1.80002	-1.99872	-0.112698	0.699169	1.0138	1.37783	1.09978		1.44065	0.751442	1.15997	0.191461			1.88972	1.37474	1.33427	1.39041	0.857126	0.354011	0.910713	1.33132	0.259065	1.2239	1.64229	1.24591	0.433937			1.09696	2.21664	0.94447	-0.584447	0.645995	-0.132204	0.111492	0.656511	0.634918	2.01443	1.89591	0.986553
708	R63065*12C9	glutathione S-transferase M3 (brain) GSTM3	Hs.2006						0.505441	-1.82568	0.61696	-3.05083	1.3571	-0.639383	-1.24464		-1.70334	0.21049	-2.6117	-1.06739			0.677582	-1.36397	0.77271	-1.75004	-0.959299	-2.88733	-2.44997	-0.334252	-2.71576	1.19309	-0.0436836	-1.81392	-1.70445			3.29411	0.775968	-2.08461	-1.74027	0.402525	-0.75356	-1.68386	-2.27611	2.69732	-2.59901	-1.86421	-1.599
709	H05489*13C1	deoxycytidine kinase DCK	Hs.709	0.84907	1.13548	-0.666885	-0.630031	-0.205523	-0.17239	0.142332	0.0804326	-0.603944	-0.467065	0.229969	0.0522253	-0.564262	-0.798152	-0.345504	-0.334015	-0.0618883			-0.629587	-0.58627	0.205917	-0.576422	-0.91058	-0.22627	-0.202878	-0.344645	0.155296	-0.165201	0.530789	-0.504323	-0.127608	-0.668767		0.625333	0.137898	0.111005	-0.0606933	-0.27703	0.0318656	-0.257337	0.468238	0.0534635	0.224265	-0.343552	-0.523916
710	AA410404*13C5	damage-specific DNA binding protein 2, 48kDa DDB2	Hs.77602	-1.164	-0.170691	-0.510606	-0.736043	-0.406483	0.104786	0.0343199	-0.120602	-0.754292	-0.0547397	-0.987837	-0.831447	-0.616212	-0.617011	-0.0850027	-0.200671	-0.112288			0.375521	0.378801	-0.158925	-0.0932781	-0.643304	-1.39625	-1.144	-0.327471	0.377585	-0.13386	-1.39027	-0.673493	-0.166809	0.0504815		-0.43681	0.304626	0.214898	-0.59528	-0.315942	-0.268279	-0.530008	-1.20782	-0.895064	0.46629	-0.067516
711	AA455300*13C9	cold shock domain protein A CSDA	Hs.1139	0.602562	-1.87462	0.95684	0.911362	0.676106	1.3124	-0.074297	2.84489	0.819782	-0.243656	-0.122637	1.60633	0.661815	1.38165	1.36288		-0.414865			0.928128	0.814471	0.342464	1.39461	1.24204	0.691721	0.902773	0.404346	0.310027	0.341402	1.71465	0.610634	0.252779	0.938794		0.501416	1.09931	0.308594	0.936851	0.162188	0.598126	0.416708	1.3023	0.346569	0.852723	0.607733	0.849641
712	H81200*14C1	hypothetical protein MGC2198 MGC2198	Hs.227152	-0.936442	-0.183121	-0.35733	-0.025158	-0.233757	-0.433942	0.714282	0.0784409	0.0618952		0.0151101	0.131623		0.222674	1.01613	-0.0726512	-0.0357209				0.743608	0.0367559	0.402485	-0.248667	0.0747642	-0.0238637	0.245558	0.00866781	0.197317	0.426465	0.256868	-0.00780006	0.0481894		0.341771	0.251998	0.100627	-0.628188	0.189074	0.0373354	-0.536191	0.387872	-0.398418	0.178641	-0.0451275	0.281015
713	AA262988*14C5	brain-derived neurotrophic factor BDNF	Hs.56023	-0.112391	-0.959461	-0.870604	-0.0281386	-0.0303388	-0.550812	0.0758692	1.30413	-0.583123	-0.128152	0.761064	-0.0151572		-0.656713	-0.53472	-0.7833	0.0723427			0.228532	-0.0880394	-0.279258	-0.0782504	-0.945059	-1.19159	-0.262332	-0.648769	-1.91746	-0.795221	-0.915813	-0.290061	-0.937564	-0.230924		0.071099	0.0254653	-0.383694	-0.89351	-0.846262	-0.240662	-1.58917	-0.621948	-1.77141	-1.02756	-0.974899	-0.581265
714	AA424833*14C9	bone morphogenetic protein 6 BMP6	Hs.285671	0.992626		0.0218252	0.308891	-0.182706	0.491244	-0.12895	2.74163		-0.281806	-0.0271857	0.499421					0.266431					0.0662814	0.131019	0.153975	0.207219	-0.293846	0.84674	-0.342014	0.339199	0.675864	0.592763	-0.658917	-0.0547955			-0.140145			-0.333674	-0.215255	-0.193754			0.356988		-0.619473
715	AA598492*15C1	stromal cell-derived factor 1	Hs.237356	0.367514	-0.0711347	0.279757	1.1602	0.349204	1.06268	0.0452185	-0.805367		-0.464638	-0.254408	-0.0801982			-0.147024		0.0448864			0.585339		-2.36596	-0.470693	-0.333271	-1.27363	0.583223	-0.410433	-1.88862	-0.968917	-0.184479	1.14455	0.0294348	-0.181026		1.1752	0.853603	-0.340973	-0.233028	1.41632	0.427761	-0.27127	0.172354		-0.757752	-0.123301	-0.747812
716	AA448184*15C5	ubiquinol-cytochrome c reductase, Rieske iron-sulfur polypeptide 1 UQCRFS1	Hs.170107	0.922944	0.437005	2.33187	0.518764	0.693414		-0.751757	0.902604		-0.227122	0.138264	-0.201497			0.561473		0.0347265			0.444116		-0.89538	0.485035	1.10367	0.353977		-0.404409	-0.258295	0.0906643	0.290141	-0.00119041	0.248021	0.171991		0.145311	0.649074	0.518334	-0.121839	-0.509626	-0.369342	1.04905	-0.144979		-0.0495914	-1.02618	-0.256333
717	AA487429*15C9	thrombospondin 4 THBS4	Hs.211426	-1.10095	-0.953917	-0.160185	0.367607	0.296323	-0.823434	2.48969	2.55974	1.16535	1.5461	1.1191	0.652919		1.30874	1.71833	0.373804	0.410667			1.8983	1.68174	2.09505	1.1922	1.73724	1.7544	0.347614	1.96658	2.45006	2.27423	1.97741	1.22947	1.15588	1.79826		0.901552	0.0597569	1.58745	-0.343789	1.07764	0.960369	-0.0694961	-0.45182	5.0565	1.62283	1.88511	-0.0763897
718	AA056390*16C1	Homo sapiens, Similar to RD RNA-binding protein, clone MGC:2263 IMAGE:3050953 AA056390	Hs.106061	0.060609	0.0355459	-0.0554989	-0.712827	-0.0829589	-0.383815	0.628902	0.210775	-0.539452	0.39889	-0.157947	-0.590391		-0.314053	-0.12169		0.618174			-0.753084	0.661239		-0.156693		-0.313992	0.274585	-0.0975359	0.111847	-0.570796	-0.331278		-0.437396	-0.289603		-0.328872	-0.115521	-0.895762	-0.7735	0.667984	-0.252051		0.383063	0.0747659	-0.334184
719	AA460157*16C5	retinoblastoma binding protein 2 RBBP2	Hs.76272	0.167169	0.774091	-1.14083	-1.09276	-0.643012	-0.0945373	-0.0522631	-0.394777	-0.233006	-0.20988	-0.0538767	0.0215058	-0.606491	-0.314248	-0.442957	0.045861	-0.620721			-0.397866	-0.0609289	-0.466311	-0.0205045	-0.625524	-0.141143	-0.429736	-0.18466	0.551952	-0.347096	-0.360835	-0.535411	-0.139467	-0.393706		0.0189891	-0.605778	-0.74715	-0.12266	-0.0463975	-0.492471	-0.454467	-0.684999	0.039893	-0.0545542	-0.830657	-0.381423
720	AA088745*16C9	RAB6A, member RAS oncogene family RAB6A	Hs.5636	-0.678068	-0.0257483	-0.311044	-0.175086	0.432759	-0.163085	0.240649	0.481228	0.254288	0.172819	-0.415694	0.27525	0.0773052	-0.213631	-0.227511	0.296091	0.422889			-0.138636	0.124173	0.397671	0.794668	0.479738	-0.0481875	0.00320472	0.0194083	0.90853	0.0118061	0.150344	-0.116785	0.585413	-0.229225		-0.0744618	0.288038	0.433606	0.0429686	0.340627	0.321726	0.786432	0.00988518	0.972778	-0.13313	0.161763	-1.48576
721	AA490039*17C1	NRAS-related gene D1S155E	Hs.69855	-0.750004	-0.410939	-1.17019	-0.514691	-0.827151	-0.192717	-0.631203	-0.134993	-0.109787	-0.529412	-0.237195	0.0166412	-0.378421	-0.370515	-0.599175	-0.0548696	-0.261509			-0.307563	-0.565557	-0.515675	0.236755	-0.446308	-0.401935	-0.789966	-0.263082	-0.472421	-0.447761	-0.532092	-0.589166	-0.581012	-0.489946		-0.450601	-0.237939	-0.364827	-0.0477628	-0.525007	-0.127437	-0.131456	-0.969788	-0.311904	-0.117098	-0.974429	-1.06502
722	AA442095*17C5	neural precursor cell expressed, developmentally down-regulated 4 NEDD4	Hs.1565	-0.60198	-0.476513	0.64517	-0.324137	-0.453819	-0.0637241	-0.359894	0.174637	-0.182737	0.262419	0.554603	0.155182	-0.326966	-1.32158	0.122138	0.0253998	0.117743	-0.194787	0.0205533	-0.131748	0.393933	0.332639	0.374754	-0.078232	-0.269519	0.0739054	0.361528	0.252252	0.31934	-0.191621	0.0756133		0.0545629	0.551689	-0.0616644	0.109892	-0.00535911	0.350659	0.584016	0.0605508	-0.558039		-0.0851095	0.249281	-0.44888	-0.14546
723	AA457042*17C9	myxovirus (influenza virus) resistance 1, interferon-inducible protein p78 (mouse) MX1	Hs.76391	1.16356	0.277278	2.86513	1.16345	2.87972	2.49923	2.51131	1.48177	1.69488	0.805654	0.854352	1.80053			1.71581	0.930685	0.559977			1.40931	2.15669	1.27891	1.02141	2.357	0.506443	0.871529	1.52154	3.36572	0.86906	0.669794	1.64433	0.531449	1.30811		1.78238	2.58422	0.54907	2.98314	2.98942	2.59685	1.66218	3.80104	2.80797	3.67425	1.63721	2.40143
724	AA431475*18C1	transmembrane protein with EGF-like and two follistatin-like domains 1 TMEFF1	Hs.78531	0.0505771	2.13442	-0.820149	-0.43445	-0.156992	-0.703681	0.46663	-0.0494982	-0.183282	-0.551834	-0.0745436	0.00947997		-0.165537	0.0725915	0.210668	1.27017			1.19066	0.157053		0.260688	-0.621597	-0.119604	-0.247577	0.69787	0.141472	-0.239458	-0.23389	-0.506271	-0.603609	0.737131		-0.239104	-0.729736	0.505574	-0.353283	-0.517766	-0.736616	-1.97703	1.0077	-1.79531	-0.397572	-0.88653	1.21948
725	AA490903*18C5	pleckstrin homology, Sec7 and coiled/coil domains, binding protein PSCDBP	Hs.270	0.674676	-0.182196	0.372134	1.20198	1.33947		0.409049	0.59901	-0.270743	0.0577028	0.740201	0.173259			-0.870088	-1.20805	1.35873		0.0535261	0.544039	0.204757	-0.519984	-0.0373007	1.20154		-0.128671	-0.0297741	-1.84063	-0.395143	-0.165759	-0.0681844	-0.159509	-0.00109731	-0.422401	0.762125	0.587573	0.11846	0.339116	1.49635	1.14955	2.62282	-0.373945	1.5032	-0.742982	-1.01163	-0.764138
726	AA029497*18C9	thymidine kinase 2, mitochondrial TK2	Hs.274701	0.290839	0.341641	0.0468289	0.313593	-0.0613071	-1.30327	0.509047	0.0639055		0.503496	0.418835	0.816582			0.240727	0.232744	-0.0127317	1.1059	0.594249	0.977239	0.0911059	-0.397968	0.444521	-0.474751	-1.73547	-0.588312	-0.0542094		0.41388	-1.13374	-0.199721	-0.561102	0.81736	0.11526	0.868424	0.501261	0.267854	-0.874546	0.0806718	0.307933	-0.00016086	-0.47436	-0.706688	-0.649353	-0.0800477	-0.526657
727	AA450205*19C1	translocation protein 1 TLOC1	Hs.8146	-0.273869	-0.671601	-0.625975	-0.118607	-0.255463	0.383059	0.00258111	0.386545	0.00973058	0.0174099	-0.00246468	0.499907	0.623151	-0.049399	-0.313352	0.344611	0.123177			-0.0906811	-0.102496	0.0667556	-0.0676691	0.13036	0.0656902	-0.254553	-0.0416972	0.428533	0.497258	0.134568	-0.168581	0.148321	-0.287455		-0.0301176	-0.241306	0.224527	0.143458	-0.230255	0.198067	0.66594	0.225968	0.821008	0.472006	0.0842814	0.259864
728	AA432063*19C5	thiosulfate sulfurtransferase (rhodanese) TST	Hs.248267	0.547299	0.0304307	-0.399983	-0.336354	-0.181998	0.103945	-0.226926	0.10455	-0.359435	-0.563852	-0.323954	-0.148642	-1.46413	-1.43779	-0.0612154		-0.0326796			-0.217835	-0.177706	-0.104921	0.387362	-0.234965	-0.69259	-0.956611	-0.378963	-0.278141	-0.588985	0.000850461	-0.446927		-0.207795		-1.46722	0.11303	-0.285524	-0.202804	-0.916019	-0.552271	-0.882002	-0.39871	-1.20754	-0.242542	-0.567509	-0.382074
729	H23202*19C9	protein tyrosine phosphatase, receptor type, R PTPRR	Hs.198288	0.727269		0.379255	0.160021	0.583709	0.994273	0.572432	0.729036	2.12247	0.844821	1.11061	0.225602	0.583229	-0.222224	3.57781		-0.0154504			1.95309	1.51543	2.63824	1.96965	0.216646	2.02058	0.334268	2.54285	1.94243	1.8591	3.32796	1.2373	-0.441886			1.30882	0.0534388	0.031489	0.128185	-0.128536	-0.114595	-0.320202	0.274587	0.888975	3.43174	-0.0824324	1.32415
730	AA598942*20C1	KIAA0097 gene product KIAA0097	Hs.76989	-0.710566		-1.32153	-1.25465	-0.315346	-0.81683	-0.0719488		-0.708695		-1.33349	-1.27113	-1.06985	-1.15025	-1.11227	-1.08309	-1.07125				-0.602017	-0.657933	-0.408474	-0.529487	-1.10937	-0.64422	-1.05252	0.0880154	-0.703493	-0.593338	-0.608201	-0.971888	-0.716771		-0.99308		-0.615119	-0.715037	-0.405707	-0.832509	-1.00452	-0.289612	-1.04309	-0.20482	-0.067173	0.26578
731	H67274*20C5	KIAA0088 protein	Hs.76847	0.865657		-0.842437	-0.598416	0.0167199	-0.655961	-0.188268	0.208256	-0.682166	-0.267809	-0.788288	-0.722675		-0.581026	-0.815458	-0.988194			-0.0472098	0.0808138	-0.260411	-0.155563	-0.467217	-0.466851	-1.52326	0.0625333	-0.341648	-0.461033	-0.699116	-0.625715	0.373376	-0.737016	-0.105615		-0.0350882	-0.204256	-0.50537	-1.35738	0.595155	-0.545737	-0.788956	-0.400224	-0.879326	-0.19286	-0.771751	-0.620555
732	AA429657*20C9	KIAA0080 protein	Hs.74554	1.94063	2.10467	-0.226453	0.183087	0.0561987	-0.19173	2.3312	0.0981455	-1.1302	-0.161045	-0.734293	-0.357432			-0.641665		-0.122172		-0.0416243	0.313516	0.310573	-0.687754	-0.0376669	-0.347596		-0.201977	-0.520431		-1.15509	-0.248386	0.508992	-0.757168	0.128861		0.141085	-0.154714	-0.383746	-2.24176	0.263676	0.0781876	-0.316727	-0.722826		-0.236512	-0.899736
733	R86843*21C1	Homo sapiens cDNA: FLJ22488 fis, clone HRC10948, highly similar to HSU79298 Human clone 23803 mRNA	Hs.34054	0.210678	0.296502	0.605421	0.326632	0.219278	-0.396299	0.94763	0.0751737	0.141494	0.560797	0.365852	0.283915	-0.329255	0.937493	0.33609		0.162861		-0.152034	1.12582		-0.110424	0.319758	-0.405711		0.147589	0.433874	-0.368131	-0.120433	0.00433604	0.338497	-0.130284	0.397618		0.297728	-0.0935819	-0.0813048	-0.352903	0.168106	5.08e-05	-0.637465	-0.442026	-0.52211	0.345453	-0.471829	-0.29532
734	AA455225*21C5	Human clone 23721 mRNA sequence	Hs.83572	-0.476291	0.307506	-0.664191	-0.99875	-1.252	-0.574661	-1.29574	0.0122131	-0.543992	-1.09291	-0.422117	-0.213424	-0.479541	-1.2605	-1.48261	-0.479097	-0.257269			-0.904667	-0.724699	-0.251569	-0.336115	-0.466775	0.0672279	-0.864604	-0.55666	-0.332873	-0.428207	-0.45058	-0.704261	-0.304801	-0.389734		-0.392414	-0.792966	-0.414623	-0.595885	-1.01998	-0.558723	-0.714695	-0.586392	-0.662707	-0.0423871	-0.381909	0.148413
735	AA113331*21C9	Human clone 23574 mRNA sequence	Hs.79385	0.149748	0.106561	0.111486	0.061714	0.171585	-0.0463804	0.386443	0.0880452	-0.168845	0.194799	-0.0163177	0.119898		-0.0887092	0.00235795	0.180126	-0.476326		0.139996	0.420065	0.232228	0.360277	0.400003	0.061962	-0.00195016	0.0720799	0.312814	0.0422025	0.0137186	0.15948	0.0455779	0.146979	0.207008		-0.0644292	0.34893	0.191252	0.332703	0.114828	0.0561758	-0.0690653	0.131723	0.225288	0.421962	0.0312452	-0.022901
736	AA421688*22C1	tissue specific transplantation antigen P35B TSTA3	Hs.264428	0.0933184	0.613556	0.756488	0.710927	0.738588	-0.784759	1.09105	0.867802		0.769434	0.696297	0.590589			1.10394	0.258503	-0.0224379		0.634752	0.751629	1.47394	0.994076	0.866171		-0.0722636	0.717352	1.77147	0.539796	0.313005		0.904835	0.614981	0.897806		0.470777	1.10515	0.965329	1.12336	0.44927	0.0841292		1.14001	0.345774	0.445914	0.805622	1.096
737	AA465369*22C5	transcription factor Dp-2 (E2F dimerization partner 2) TFDP2	Hs.19131	-0.872473	-0.731978	-1.93141	-2.17211	-2.09742	-1.34476	-0.601713	-0.805409	-0.860138	-0.995262	-0.0343276	-0.284229	-2.43641	-1.7716	-0.767332	-0.635039	-0.337753		-1.66315	-1.32939	-0.342869	-0.60129	-0.248416	-2.21431	-1.56568	-1.02851	-0.888243	-1.00492	-0.84257	-1.03072	-0.960206	-1.50284	-1.05603		-1.41177	-1.11159	-1.20926	-0.705807	-2.17576	-1.09466	-1.31033	-2.04176	-1.56844	-0.919071	-2.20222	-0.851511
738	AA485944*22C9	DEAD/H (Asp-Glu-Ala-Asp/His) box polypeptide 17, 72kDa DDX17	Hs.6179	-0.285535	0.492262	-0.0843542	0.105504	0.141883	0.0449148	0.668823	0.138786	0.66896	0.741782	-0.330767	0.0930555	0.0770513	-0.206939	1.14556		0.378729		0.323338	1.13956	0.753079	-0.708562	0.631763	0.321934	-0.200561	-0.854321		-0.422038	0.617083	0.240395	-0.0740088	-0.0789418	0.50884	0.383004	0.306558	0.303531	0.64323	0.0872918	-0.0532669	-0.0118207	0.0933562	0.10982	-0.0454586	0.368361	-0.0859628	0.303815
739	AA487442*23C1	RNA binding motif protein, X chromosome	Hs.146381		0.281161	0.0326226	-0.0457826	-0.0278911	0.204565	0.235527	0.041808	0.309138	0.41416	0.10116	0.116345	0.0381421	-0.157283	0.0958381	0.266997	0.302349		0.0517129	0.602411	0.137632	-0.0835654	0.560297	0.28292	-0.347748	-0.455531	0.386818	-0.652352	0.407249	0.267149	0.148993	-0.221443	0.201942	0.173062	0.276469	0.14783	0.489134	0.0923753	0.0137989	-0.0406681	-0.2986	-0.102554	0.0151585	0.326166	0.0497687	0.411677
740	T62086*23C5	serine (or cysteine) proteinase inhibitor, clade D (heparin cofactor), member 0	Hs.1478	-2.60343	-2.021	-2.32328	-2.21024	-3.13687	-2.5132	-2.73405	-1.58026	-2.35022	-1.33127	-3.44157	-2.92393	-4.52312		-2.63794	-2.10268	-1.32025		-1.85626	-3.07499	-2.44773	-1.51664	-1.41786	-2.08685	-2.76461	-2.61916	-2.91483	-3.57675	-1.5223	-2.41687	-1.84821	-2.26999	-1.01418		-2.44577	-2.84686	-3.31709	-3.71545	-3.35299	-1.34718	-3.00977	-2.93833	-3.58612	-3.25587		-2.55968
741	AA447551*23C9	RBP1-like protein	Hs.17428	-1.29671	-0.235027	-0.396397	-0.667709	-0.310249	0.253321	-0.504999	-0.706567	-0.30589	-0.323476	0.272976	-0.099772		-0.615483	-0.415253	-0.245018	-0.0475772		-0.855812	-0.621896	0.214368	-0.224938	0.0784103	-0.365493	-0.131887	-0.522409	-0.211242	0.0542765	-0.472599	-0.344616	-0.804882	-0.666314	0.139532	-0.457023	-1.03438	0.436403	-0.311463	-0.441947	-0.800208	-0.764291	-0.838159	0.418551	-0.0820718	-0.43462	-0.202978	0.284251
742	AA598676*24C1	reticulocalbin 2, EF-hand calcium binding domain RCN2	Hs.79088	0.621152	-0.0613626	-0.772145	-0.477964	-0.616429	0.703034	-0.553845		0.171016	0.0339143	-0.14694	0.133522		-0.382224	-0.421522	0.172719	0.00522868		-0.416152	-0.379477	0.185376		0.428831	-0.186867	0.0246606	-0.51795	0.2968	-0.148381	0.216868	-0.0473926	0.566108	-0.158078	-0.106769	0.658815	0.627879	-0.0508708	0.217195	-0.398942	-0.622358	-0.158423	-1.3131	-0.206275	0.537518	0.951714	-0.48324	0.890452
743	AA461332*24C5	chloride channel 3 CLCN3	Hs.174139	0.172549	1.4922	-0.0382122	0.601692	-0.0154569	0.487411	0.716741	-0.27481	1.54448	0.771749	0.990595	1.1316		1.29589	0.924487	1.90109			0.580621	1.91301	0.72702	1.29305	1.20753	0.728767	1.83914	0.372113	0.673662	0.740632	1.56945	1.17318	0.803419	0.622618	0.469622	0.670556	1.35167	0.613925	1.32274	0.604429	0.391283	0.626137	0.257503	0.87862	1.37999	1.48195	0.725496	0.595305
744	AA449831*24C9	growth factor receptor-bound protein 2 GRB2	Hs.296381	-0.0772782	0.23113	-0.256329	0.277663	0.108351	-0.240147	0.129763	0.0477465	-0.269781	-0.158126	-0.473296	-0.197434	-0.16684	0.468335	-0.149795	-0.321817	-0.355741		-0.0446368	0.195158	-0.163627	0.17811	-0.00750143	-0.018748	-0.16523	-0.0815461	0.0934754	0.131142	0.0651905	-0.170403	0.303829	0.0572799	-0.206723	-0.552708	0.384519	0.237726	-0.316092	0.21397	0.616754	0.447695	0.239004	0.097582	0.354904	0.0082362	-0.0768154	-0.477646
745	AA477781*25C1	cytochrome P450, family 51, subfamily A, polypeptide 1 CYP51A1	Hs.226213	-0.492126	-0.992664	-0.444171	0.0906562	-0.529442	1.6739	-0.919605	-0.415555	-0.345659	-0.885225	-0.483892	-0.982363	-1.94849	-1.641	-0.914751	-0.987353	-1.32019	-1.41079		-1.80693	-1.72654	0.45112	-0.547166	-0.484867	-0.60893	-0.661	-1.52523	-1.0622	-0.222299	-0.625371	1.52622	-0.65873		-0.83304	-0.542105	-0.98185	-0.566512	-0.28309	-1.16351	-0.398133	-0.865802	-0.818302	-0.79324	-0.972138	-0.678044	0.219576
746	AA487486*25C5	cyclin D1 (PRAD1: parathyroid adenomatosis 1) CCND1	Hs.82932	-0.978957	-1.59714	-1.77336	-0.364313	-0.0292895	-0.660773	-2.32994	-1.08245	1.03286	0.18917	1.69887	0.570336		2.46473	-0.643141	0.631119		1.1924		0.806949	-0.0476266	0.587678	0.172629	-0.321808	1.60902	-3.13199	-0.158744	-5.6784	0.674115	-0.384398	0.0887493	0.154347		0.169872	-1.12381	-1.17485	0.409305	-1.09568	-2.70316	-1.36081	-0.851011	1.50145	-2.992	-0.595963	0.14252	1.26172
747	AA461048*25C9	creatine kinase, mitochondrial 2 (sarcomeric) CKMT2	Hs.80691	0.344573		0.0784478	-0.46635	0.434585	0.237348	-0.31632	-0.0695517	0.711301	0.908291	1.29349	0.512199	0.612092		0.362233	0.733274	0.481251	0.548717		0.84149	0.9617	0.18976	0.505106	0.128348	1.18582		1.64383		-0.135971	0.428831	0.480491	-0.241514		0.645004		-1.02583	0.593351	0.472091	0.680044	0.288058		0.748403				0.980183
748	T72076*26C1	retinol-binding protein 4, interstitial	Hs.76461	1.32952	0.60191	1.28955	0.875158	0.940389	1.69678	1.12627	1.0113	0.687238	0.922689	0.847457	0.41386	1.72757	2.07511	1.99822		0.36958	0.801851		0.56918	1.63808	0.669002	1.71786	0.601583	1.12382	1.1086	1.92095	0.706659	1.27095	0.663643	0.718009	-0.124334		0.232043	1.7111	0.409931	0.551412		1.61254	0.38344	1.24173	1.271	1.92867	1.97356		1.33474
749	T63324*26C5	major histocompatibility complex, class II, DQ alpha 1 HLA-DQA1	Hs.198253	4.03538	2.47762	2.70846	5.28718	5.83619	4.09338	4.97156	3.41266	-0.0106957	2.08252	2.30909	5.7398		2.8204	1.37542	1.24511	0.553864	1.20079	2.91149	1.84767	1.64664	1.49032	2.05666	3.24758	0.725043	4.30252	2.8931		3.1394	2.04944	2.32168	1.44624	0.647256	1.34553	2.94587	4.99685	2.38717	4.21651	6.39401	5.06894	7.10481	2.07465	4.06358	2.36537	2.75504	1.3565
750	T86934*26C9	CD79A antigen (immunoglobulin-associated alpha) CD79A	Hs.79630	0.576636	-0.180716	0.587453	1.00278	0.769214	0.964879	1.453	0.511301	0.145712	0.57679	0.0390928	1.71834			-0.461836			-0.0524002			-0.226685	0.496482	0.839307	0.0691276		0.211156	0.593862		0.266547		1.03046			-0.033541		1.82618	0.463644	0.280613	3.27633	2.16131	2.83211		1.28156	0.00525711		0.325432
751	T96855*27C1	EST T96855	Hs.325080	-0.424164	-0.22737	0.76447	0.7235	-0.186604	2.11499	-0.0883597	0.152588	-0.215795	-0.464638	0.532479	0.690625	-0.336814		-0.517981	1.22858	0.0412327	-0.0102496	0.404622		0.849164	-0.335405	0.739775	0.900093	0.306815	-0.275317	-0.374171		-0.296222	0.341252	0.281911	0.11436	0.685788	0.772455	-0.0914329	2.48496	0.379528	2.02167	-0.0037761	0.546101	0.55663	2.01519		0.113456	0.765297	0.245781
752	AA065090*27C5	calcineurin-binding protein calsarcin-0	Hs.42346	0.0585184	-0.21562	-0.0672217	-1.05329	-0.161963	-0.731513		0.0371365	0.365696	-0.370509	0.0421548	-0.275417		-1.34445		-0.031188	-0.791393	0.332416		-2.38891		-0.198311	-1.78971	1.22767	-0.152569	-0.399668		0.460258	-0.0796419	-1.38015	-2.12317	-0.642416		0.908191	-0.548352	-1.04818	-1.29547	-0.115246	-1.25738	-0.445941	0.684516	-0.0416093	-0.324137	-0.585454	-0.0730002	-0.885879
753	AA025779*27C9	hypothetical protein FLJ12089 FLJ12089	Hs.11896	0.523492	-0.835302	-0.0537394	-0.519121	0.895776	0.287825	1.62141	1.06521	2.03618	1.00112	1.32792	2.11606		0.924017	0.622124	1.33849	1.59319	1.83927		1.18072	1.46384	1.70285	0.508472	1.33942	1.93548	1.26411	1.20828	1.8211	0.970272		0.974197	1.59621		1.45707	1.23765	0.243342	2.35872	1.59282	-0.246493	0.804158	1.88681	-0.0336653	1.38888	2.82375	1.29126	2.21298
754	R02578*28C1	CGI-20 protein CGI-20	Hs.107387	-0.349199	0.0979919	-0.589145	-0.323161	-0.548331	-0.370733	0.400154		0.329612	0.0546468	0.113526	-0.153315			0.0398403		0.0126591	0.593871		0.325607	1.28995		-0.0836022		-0.255249	0.379904	0.926442	-0.762287	-0.283401		-0.47704			-0.0194805	0.276912	-0.600561	0.117853	0.0505094	-0.0187163	0.015831	-0.895335	0.213892	-0.174823	0.716707	-0.332762	0.152149
755	W56287*28C5	F-box and leucine-rich repeat protein 11 FBXL11	Hs.219614	0.351561	-0.0217083	0.201348	0.443953	-0.21315	0.0826682	0.0876759	0.0254974	-0.00714256	0.0979792	0.107807	-0.194446	-0.0999422	-0.11372	0.933527	-0.269442	-0.331077	-0.429181		-0.167836	0.964802	0.395161	0.042366		-0.199722	0.552291	0.861319	0.597374	-0.228558	0.0597516	0.0784287			0.49261	0.196972	0.168772	-0.528774	-0.0140489	0.389323	-0.116136	-0.0765577	0.789095	-0.0415856	-0.215724	-0.369751	0.363802
756	N63745*28C9	ankyrin 1, erythrocytic ANK1	Hs.183805	0.492981	0.475213	0.591425	0.408148	0.267868	0.0958754	0.532459	-0.0596427		0.524416	1.28519	0.358364	-0.0883303	-0.324756	0.627833	0.924682	0.232718	0.455185		0.155001	0.985684	0.592009	0.583952	0.550397	0.33449	0.397472	0.466901	-0.0764289	-0.0543509		0.129139			0.0160368	0.565087	0.283312	0.198873	0.376854	0.328907	0.122566	-0.319127	0.365934	-0.141356	0.0498352	0.0842789	0.409474
757	H52098*29C1	ESTs H52098	Hs.19081					0.553484	-0.169167	-0.146341	-0.05429	0.874214	0.481265	0.286846	0.498688	1.80733	1.86191	0.273256		-0.0583947	1.52474		-1.27399	0.629265	-0.0649003			0.869493	0.20982	1.49434	0.361281	0.939828		-0.562049						0.128007	0.155642	-0.414843	-0.0863007	0.492914	1.97374		0.728517		0.48009
758	R99579*29C5	ESTs, Weakly similar to hypothetical protein FLJ21617; erythroid differentiation-related factor 1 [Homo sapiens] [H.sapiens] R99579	Hs.141347		0.398148	0.335163	-0.0942946	-0.0567954	-0.878058	-0.248616	0.28629		-0.114933	0.147378	0.56043	0.295015		-0.245206	0.184581		0.553139			0.562379	0.0166092		0.558554	0.482547	0.0635507	-0.36698	0.885535	-0.252325	0.310109	-1.81225	0.0783602		0.102315	-1.18655	-0.933286	-0.153646	0.16885	-0.647769	0.120702	0.678234	-0.0533613		-0.291194		0.760539
759	T78604*29C9	ESTs T78604	Hs.184407	-0.276438			-0.0966787		-0.343839	0.108034	0.0323214	0.497209	0.0562386	-0.149445	-0.0550557					-0.0733817	0.608688		-0.313603	0.82832	0.238998		0.229831	0.469952	0.994613	0.832391		-0.0650032	0.543682	-0.0974717	-0.240172						-0.180579	0.031186	-0.134327		0.985097		1.02942		0.290612
760	N57750*30C1	protein kinase, cAMP-dependent, catalytic, alpha	Hs.194350					-0.904971		-0.969265	-0.914713	0.174825	-0.645748	-0.618429	-0.756101						-0.31376		-1.13497	0.111054	-0.0204942	-0.528218				-1.83001				-1.44438				-0.943697	-1.35423	-1.14707	-1.03627	-1.44756	-0.560689				-1.1156
761	R70037*30C5	Data not found R70037			0.229138	0.561321	0.39125	0.2116	-0.444823	0.0382376	-0.002211		-0.248136	0.406759				0.0738463	0.338566	0.678546	0.755527		0.467223	-0.0411378			0.380943	0.774823	0.236309	0.504602		-0.0246007	0.00914172	0.181046	-0.970125				-0.638006	0.675704	0.579903	0.520692	-0.0314516				0.502348
762	R02591*30C9	WD repeat domain 22	Hs.509780	0.519433	0.349037	0.697526	0.375046	0.47826	-0.124294	0.612626	0.197462	0.914176	0.637319	0.611643	1.00086	0.627548	1.20697	0.744986	0.669074	0.0970815	1.07418		1.18962	0.192521	1.0474	0.222391	0.505369	0.328993	0.209648	0.683706	-0.0587755	-0.0187515	0.507619	0.528416	0.457682	-0.0603219	0.0816775	0.209498	0.563229	0.903644	0.245518	0.17013	0.681223	0.719442	0.605847	0.438551	1.1015	0.374673	0.420358
763	R01227*31C1	ubiquitin-conjugating enzyme E2, J1 (UBC6 homolog, yeast) UBE2J1	Hs.279948	0.055199	-0.485151	-0.851845	-0.216961	-1.10836	-0.287941	-0.417045	-0.809547	-0.170775	-0.710306	-0.819384	-0.145774		-0.705653	-0.662825		-0.848015	-0.655295	-0.723185	-0.908452	-0.794003	-0.415385	-0.0682596		-0.313573	-0.431006	-0.357654	-0.261728	-1.10766	-0.377927	-0.605647	0.0357908	-0.865334	-0.692431	0.0654249	-0.133407	-0.110564	-0.267876	0.265098	0.365181	0.586412	-0.96482	-0.00154407	-0.683625	-0.68255	0.30592
764	N64431*31C5	tubulin, beta 1 TUBB1	Hs.303023	-0.633943	-0.646298	-0.479132	-0.600503	-1.32752	0.00903236	-0.540354	-0.550841		-0.824925	-0.617135	-0.588186	0.0354873	1.4191	0.249343	0.215822	0.23187	-0.863209		-0.410321	-0.61461	-0.746328	-0.284639	-1.07754	0.340273	-0.423628	-0.194446	0.0231836	-0.109437	-0.407615	-0.341952			-0.620146	-0.856136	-1.25649	-0.790657	-0.321321	-0.161145		-0.605233	0.207315	-0.319899	-0.361044
765	R48248*31C9	hypothetical protein FLJ22002 FLJ22002	Hs.183171	-0.658145	-0.487945	0.696643	0.507141	-1.45884	-0.283095	-2.12172	0.947129		-2.47256	-1.14698	0.459144	-0.797112	0.354485	0.483962	-0.531214	-0.223197	-2.84614		0.0961577	-1.23686	-1.2257	-1.11794	-0.129181	-1.75552	-1.85956	-1.08752	0.105989	-1.69242	-0.0207449	-1.12152	-0.341231		-2.00469	-1.4129	0.32243	0.515623	-0.399096	-0.611667	0.030504	-0.381348	1.03311	-1.3622	-0.432987		-0.323942
766	H61530*32C1	hypothetical protein FLJ10290 FLJ10290	Hs.25516		0.48091	-0.232637	-0.146145	0.23738	-0.226837	0.201646			-0.0434595	0.169687		0.223603		0.252256		0.572165	0.0794255	-0.142031		0.348091				0.616938	0.334268	0.523967	0.405949	0.0264855		-0.756342	-0.13542		-0.0552166			0.304469		-0.0164497	-0.200165	-0.35918	0.358419	-0.652712	-0.0234994		0.117867
767	W72496*32C5	DKFZP564M112 protein	Hs.107942	-0.331209	0.260155	-0.411564	0.389821	0.0364726	-0.184005	-0.0717051	0.0896351	-0.0517659	-0.162039	0.458232	0.0938479	0.0830872	-0.172693	-0.994252	0.118509	-0.0444453	0.0954442		-0.170324	-0.403381	0.828649	-0.1851	0.307105	0.577735	0.400122	-0.105923	-0.518697	1.18985	0.925315	-0.221744	0.68696		-0.0280691	0.0192404	0.0882077	0.509533	0.408166	-0.688589	-0.110704	-0.0900328	0.729347	-0.146792	0.140402	0.446088	0.042275
768	N95450*32C9	ESTs, Highly similar to hypothetical protein FLJ10339 N95450	Hs.203963	-0.134606	0.441996	-0.706144	-0.761316	-0.783945	-0.126317	-0.826276	-0.222091	-0.781179	-0.468603	-0.333583	-0.0836131	-0.820999	-0.549126			-0.49204	-1.1336			-0.644687	-0.653161	-0.58319	-0.757423	-0.159642		-0.661757	0.674165	-0.72403		-0.562812	0.483709		-0.434682	-1.05009	-0.509857	-0.0262133	-0.808172	0.356503	-0.137251	-0.625614		-0.134617	-0.150725	-0.0552793	0.103761
769	R78554 | R78507*55C1	Data not found R78554 | R78507		0.616636	4.01758	0.659789	0.357601	0.387556		0.933923	0.714827	0.388901	0.557092	0.654105	0.218388	0.95352		0.916267		0.571553	1.40405			0.606485	0.65173	0.713105	0.280327	1.5888	0.515776	0.546442	0.925696	0.939549	0.822501	0.395578	-0.137595			-0.0549757	-0.612313	0.671604	0.642053	0.478787		0.217803	0.0282918	0.0222367	1.20012	0.257191
770	H87363*55C5	ESTs, Weakly similar to hypothetical protein FLJ20378 H87363		0.182109		-0.26225	-0.338985	-0.725689		-0.571109		-0.159969	-0.543749	-0.480821	0.325987		1.71092	-0.160209		0.407709	0.418896		0.306834	-0.178976	-0.225011	-0.596936	-1.00412	-0.747595	-0.0614033	-1.61841	-0.832575	-0.928292	-0.103029	-0.74692					-1.65151	0.675111	0.0461306	-0.150349		-0.245882	-0.739342	-2.05171	-1.11208	-0.507585	-0.757862
771	AA620357*55C9	transcription termination factor-like protein LOC80298	Hs.5009	0.0349328	0.578201	0.447985	-0.329657	-0.224825	-0.326345	0.11664	-0.162651	0.232038	-0.197154	0.219259	-0.0416735		-0.0455342	0.370632	-0.409312	0.119798	0.107081	0.0759114	-0.57812	0.447211	-0.481381	-0.266444	-0.385355	0.189109	-0.122036	-0.039766	0.0128012	-0.536241		0.0286077		-0.0395444	0.0987695		-0.109501	0.56445	0.173736	-0.41714		0.0373012	0.429332	0.202146		0.129786	-0.123605
772	H97186*56C1	potassium inwardly-rectifying channel, subfamily J, member 13 KCNJ13	Hs.296361	0.0795809		0.702783	0.294036	0.0237926		-1.01256	0.703574	0.266295			0.830454		1.71729			0.33953	0.971317	0.131686			0.577246	-0.0895383	0.584587	0.475712	0.223323	-0.158635	0.523715	-0.22282		0.0198887		0.722019	1.17456			1.30256		0.723304		0.450534	0.645527	-0.031443	0.658619	0.171036
773	N72009*56C5	ESTs	Hs.206710	-0.260255	0.224003	0.574355	0.196461	0.161865		-0.413742	0.0885692		-0.583756	-0.347988	0.0549809			-0.524787		0.323695	0.0560039	0.0641131			-0.696641	-0.716792	0.0240144	0.145269	-0.506431	-1.39904		-1.13666		-0.912152		0.315533	0.0224004		-0.664995	0.860763		0.16792		-0.605663				-0.0907358
774	W48560 | AA284259*56C9	hypothetical protein FLJ23150	Hs.137260	-0.811851	0.0997413	0.397056	-0.0389773	-0.00269439	-1.10103	-0.436829	0.0621155		-0.0506509	0.110687	0.272785		-0.355257	0.0133043	-0.0809592	0.374996	0.0158476	-0.134477	0.0957014		0.295958	-0.598466	-0.227919	0.157644	-0.00619011	-0.280094	-0.0847694	-0.243934	0.463424	0.0787949		0.2199	0.29818	-0.375248	-0.103463	-0.118172	-0.831878	-0.35774		-0.0314759	0.340727	0.102109	0.464752	-0.014872	0.30613
775	N55067*57C1	RAD23 homolog B (S. cerevisiae) RAD23B	Hs.178658	0.171788	0.455643	0.631786	-0.0771308	0.234404	-0.00541926	-0.389638	0.566502		-0.267693	-0.16358	-0.234225	-0.449649	0.125006	-0.139544	-0.0455748	0.162916	0.12594	-0.159085	-1.12159	-0.296931		-0.360426	0.267769	-0.0911809	0.0437182	-0.981572	-0.0721643	-0.351433	0.243433	-0.735827	0.745727	0.423032	0.226269	-1.60529	-0.45922	-0.415515	0.685026	0.339088	-0.224842	-0.217376	0.364262		-0.769527	-0.162478	-0.175641
776	AA007518*57C5	MAD, mothers against decapentaplegic homolog 6 (Drosophila) MADH6	Hs.153863	0.581936	0.224915	0.755724	-0.0350096	0.338357	-0.411514	0.0118254	-0.169765		-0.808476		0.175094	-0.750403		0.612747	0.118592	0.249607	-0.0211335	0.0148686		-0.27979		-0.29985	0.41398	-0.471665	0.202101			-1.31817	-0.182636	0.0529276	0.200953		0.155203	-0.770282	-0.91485	0.387966	-0.241888	0.271568		-0.346504	0.0411383		-0.390957	-0.232134	-1.0196
777	R76782*57C9	O-linked N-acetylglucosamine (GlcNAc) transferase OGT	Hs.100293	-0.400729	0.0126788	-0.190686	-1.30717	-0.121894	-0.78742	-0.571851	0.0432598	0.13624	0.315405	0.420287	0.491378	-0.0610781	-0.828522	-0.56838	0.711081	0.14315	0.791142	-0.0311496	-0.576432	0.778917	0.339557	-0.204611	0.13615	0.148103	-0.632433	-0.694726	0.459395	-0.542373	-0.546902	-1.36265	-0.203666	-0.381024	-0.297629	-0.943841	-0.977212	-0.587815	0.213454	-0.269272	-0.260745	0.865877	-0.15216	-0.809356	-0.431409	0.023547	-0.26239
778	W85697*58C1	heterogeneous nuclear ribonucleoprotein K HNRPK	Hs.129548	-0.44845	0.511586	0.105875	-0.678279	-0.0578136	-0.54189	-0.245885	0.157012	0.10127	-0.269066	-0.293798	-0.6954	-0.273063	-0.386465	0.202617	-0.226158	0.157528	-0.181035	-0.375615	-0.34271	-0.252827	0.073392	-0.395342	0.248263	-0.101216	0.0691642	-0.911439	0.338429	-0.512468	0.0122627	-0.347951	-0.234113	0.0796504	-0.22407	-0.942842	-0.209708	-0.375225	0.105883	-0.0241176	-0.190022	-0.50765	-0.394396		0.0758901	-0.270894	-0.205458
779	W94120*58C5	fumarylacetoacetate hydrolase (fumarylacetoacetase) FAH	Hs.73875	-0.322827	-0.355364	0.152205	-0.273901	0.0919425	-0.623275	-0.572573	-0.360266	-0.216833	-0.118445	0.161566	-0.272283	-0.280969	-0.331014	-0.405142	-0.509811	-0.356874	-0.274587	-0.24737	0.0136105	-0.176265	-0.0600909	-0.400901	-0.211945	-0.373235	-0.116446	-0.0516608	-0.836284	-0.243365	0.0977843	-0.264408	-0.162238	-0.573115	-0.192988		-0.249049	0.11857	0.00974104	-0.4464	-0.299201	-0.726344	0.154141		-0.307619	0.0178871	-0.289951
780	AA148548*58C9	fatty acid binding protein 3, muscle and heart (mammary-derived growth inhibitor) FABP3	Hs.49881	-0.738588	-0.778273	-0.410094	-0.211904	-0.988992	-0.900733	-0.751358	-0.70855	-1.02589	0.152212	-0.627355	-0.428575	-2.00202	0.211984	0.259735	-1.04223	-0.145963	-1.05808	0.484027	-0.414136	-0.522597	2.51624	-0.646933	-1.15997	0.0177227	-0.0416453	-0.150577	0.834535	0.0811348	-0.895571	0.0226942	-1.00816	-0.566645	-0.577663	-2.95328	-1.0017	-0.300099	-1.107	-0.512	0.578575	-0.740534	-0.850891	1.27993	-1.68129	-0.041274	1.37807
781	N70848*83C1	ESTs	Hs.238797	-0.844932	0.211864	-0.227189	-0.335413	-0.0132276	0.0444364	-0.120223	0.171411	1.03259	0.874984		0.203741	1.0432	0.350979	0.00402257	0.748759	0.733282	0.313645	-1.02945	-0.539539	-0.320442	-0.832337	0.823346		-0.360481	-0.899487	0.449875	0.514744	-0.320398	0.732972	-1.57855	1.03304	0.411715	-0.369479	-1.89206	-0.238084	0.190541	-0.303961	-1.80011	-0.17765	0.0515319	-0.0605818		0.511952	0.12696	-0.282011
782	W81135*83C5	KIAA0476 gene product KIAA0476	Hs.6684	0.585258	0.746746	0.376441	-0.0139527	0.130585	0.327669	0.533925	0.130801		0.0917292	-0.0670099	-0.469115	0.22354	1.13941	-0.420985		-0.208575	0.0816631	0.144847	0.277532	-0.0627029	-0.0670625	-0.467248	0.0201325	-0.217459	-0.111657	-0.245921	-0.090635	-0.31121	0.142908	0.22811		0.00500344	0.646235	-1.53411	0.195213	-0.440521		-0.0493609	0.341423	-0.266191	-0.0172262		-0.140636		1.26594
783	W85998*83C9	ESTs, Moderately similar to ALU1_HUMAN ALU SUBFAMILY J SEQUENCE CONTAMINATION WARNING ENTRY [H.sapiens]	Hs.20340	0.71888	-0.0860677	0.353148	-0.325401	-0.196788	1.25218	0.0878918	1.04413		-0.05855	-0.328383	0.635205	0.255461	1.17551	0.0661885	0.566531	-0.135349	0.625614	0.473811	1.08393	0.100345	-0.542177	-0.275818	0.205635	-0.44778	-0.451871	0.0209846	-0.658404	-0.06116	0.204752	0.355688	0.525524	0.412277	0.102087	-0.269571	-1.0611	-0.609065	-0.494809	-0.246482	0.194753	0.719429	-0.309845	-0.78307	0.792914		0.544077
784	W94401*84C1	ESTs	Hs.324342	-0.377783					0.221353	0.283241	0.224175		-0.0385387	-0.330122	-0.0268003	0.431776		0.349181	0.550148	0.255337	0.000232495	-0.179923	0.390513	-0.679047	-0.560654	-0.190536	0.0236266	-0.287433	0.0566611	-0.0356127	-0.0469478	0.241558	0.209875	-0.055154	0.339057	-0.545819	0.0331065	-0.039854	-0.084043	0.232966	-0.771935	-0.529733	-0.0879709	0.0457624	0.116322	-0.0876411	0.0768942		-0.204078
785	W69213*84C5	Kruppel-like factor 2 (lung) KLF2	Hs.107740	0.549324	1.13714	0.495427	0.295771	0.441655	-0.175615	0.228423	0.162207		-0.00460369	0.00597399	-0.76904	1.01592				0.182308	-0.0213065	0.347133		-0.669919	-0.639851	-0.289213	-0.036285	0.916623	0.285648	0.515889	0.338307	0.162535	0.711105	0.0931505	0.436858	0.0850021	0.172575		-0.664295			0.499105	0.0525479	0.0986687	0.901169	-0.0926705	0.391754	0.263717	0.840793
786	R88992*84C9	peroxisomal membrane protein 3, 35kDa (Zellweger syndrome) PXMP3	Hs.180612	0.230569	0.608469	-0.0416937	0.0564338	-0.407313	-0.555782	-0.491726	-0.431432		-0.026708	-0.006015	0.100451	-0.0387132		-0.143175	0.339441	-0.10613	0.363526	-0.134315	0.259923	0.229992	0.351563	-0.335627	-0.287653	0.242881	-0.50338	0.11637	0.647653	-0.555389	0.391476	-0.404812	0.719579	-0.0598543	0.256211	0.455839	-0.542863	-0.0386277	0.077835	-0.589383	-0.584979	-0.0932771	-0.0571507	-0.532636	0.0330752	-0.205696
787	AA011480*85C1	ESTs AA011480	Hs.154701	-0.2229	0.578194	0.0488129	1.16208	1.12836	0.798314	0.18201	1.22183		-0.0532975	0.170385	0.203869	0.408644		0.491669	0.373821	-0.344424	-0.734659	0.843395	0.802481			-0.353323	0.367831		0.746386	-0.0226455	0.376931	0.295319		0.857692	-1.368	0.0390422	0.169321		0.536704	1.18227	1.03941	1.56113	0.925159	2.34843		0.933396	0.940006	0.206108	0.524646
788	H65988*85C5	ESTs H65988	Hs.268957	0.234243		0.576553	0.197456	-0.127555	0.0273824	0.073311	-0.473802	-0.083223	-0.0913	0.0848644	0.268757	-0.547974	0.619948	-0.107057	0.16477	-0.0412478	0.245883	0.0682405	0.439395	0.0959355	-0.540243	-0.289402	-0.0883706	0.600994	0.025687	-0.117983	0.458691	0.0355685	0.00572377	-0.0837626	-0.260947	0.424618	0.539759		-0.547625	-0.729112	-1.21593	0.296862	-0.626548	0.108035		-0.154835	0.041224	0.212167
789	H66710*85C9	ESTs H66710	Hs.133525	-0.28524		0.269345	-0.171037	-0.658304		-0.78118			-0.582651	-0.335082	0.168398			-0.59762	-0.0220219	0.222861	-0.0782765	-0.0187448		-0.254588		-0.451342	-0.623909	-0.319288	-0.45075	-0.705457		-0.677757	0.438126	-0.507161	-1.03746	0.046516	-0.352645		-1.70006			0.69888	-0.470153	0.612503		-1.65016
790	AA664284*86C1	ubiquinol-cytochrome c reductase binding protein UQCRB	Hs.131255	-1.09977		-0.253967	0.366711	-0.945386	-0.523311	-0.858345	-0.336752	-0.645023	-0.404059	0.347792	-0.0130466	-0.124942	-0.526143	-0.0243211	-0.0165356	0.125735	-0.466	-0.68211	-0.517763	0.55369	-0.335147	-0.0498877	-0.713565	0.190157	-0.325078	0.131836	0.401029	-0.874565	1.01026	-0.886294	1.09566	-0.41867	0.0971563	0.194712	-0.339648	0.109391	-0.412835	-1.0475	-0.62773	-0.312019	-0.0935601	-1.04946	-0.452549	-0.377456	0.238991
791	N70734*86C5	troponin T2, cardiac TNNT2	Hs.296865	-0.454025	-0.111896	0.282452	0.399612		0.253232	-0.13857	-0.25553		0.0881667	0.771316	-0.014311	-0.0324299	0.58653	-0.134979	0.213429	0.226623	0.0522243	-0.585325	-0.337733	0.523256	-0.503016	-0.17315	-0.644475	-0.288981	0.391753	-0.0568278	-0.347061	-0.344396	0.395727	-0.853991		-0.0969078	-0.510523	-0.116116	0.16821	-0.000626173	-0.663063	-0.727841		-0.356211	0.300753	-0.896931	-0.656432	-0.229371	0.440265
792	AA663983*86C9	triosephosphate isomerase 1 TPI1	Hs.83848	-0.857042	-0.511929	0.432039	-0.295756	-0.336621	-0.19937	-0.779614	1.19628	0.391261	-0.137925	-0.152225	-0.239343	-0.215778	0.14653	-0.572603	-1.43997	-1.26631	-0.688185	-0.319011	0.404217	-0.305271	0.365058	-0.0344035	0.126304	0.715508	-0.0227762	0.271964	-0.191557	0.292862	0.184286	0.481417	0.101268	-0.132657	-0.139876	0.627537	0.427243	-0.114063	0.581124	-0.156667	-0.412761	-0.864901	0.159933	0.0253641	-0.455046	0.69115	0.0873641
793	W84789*87C1	pregnancy-associated plasma protein A PAPPA	Hs.75874			-1.49232	-1.19901	-0.91915	-0.196352	-0.545307	1.44426		-0.319194		-1.11947	-1.68503		-2.29192			-0.875544	-1.2536	-0.0185734	-0.726744		-0.439351		-0.415183		-1.424		-0.323058		-0.364583	0.645445	-0.843412	-1.06225		0.32664		-0.629186	-1.00275	-0.406261	-0.551482			-1.21986		-1.52256
794	AA429661*87C5	polymerase (DNA directed), delta 1, catalytic subunit 125kDa POLD1	Hs.99890					0.103518	0.551915	-1.09	1.06401		0.0882352	-0.516594	-0.457727						-0.168654		0.119719	-0.142312			-0.228178	0.313439		-0.0964161		-0.280898		0.345709	0.485211			0.17163	0.457251			-0.213427	-0.214603		-0.0786514		-0.409804
795	AA130714*87C9	placental growth factor, vascular endothelial growth factor-related protein PGF	Hs.2894	0.118797	-0.152672	0.808547	0.70419	0.556673	-0.175615	-0.0551091	0.406962		0.762701	0.628946	-0.0355825	0.663713			0.113645	0.701991	-0.116002	0.503665	1.13332	1.24716			0.3227	0.805191		0.983227				0.465031	0.540188	0.880436	-0.145267		1.6642	0.660361	1.09851	1.31259	0.410481	-0.229542	1.41621		0.303357		0.506967
796	AA034939*88C1	Homo sapiens cDNA: FLJ23176 fis, clone LNG10451	Hs.323511	1.09099	0.634108	0.431661	0.411421	0.508433	0.606199	0.0486533	0.289147	0.220285	0.402133	0.319807	0.0473407	0.521479	0.526509			-0.0165111	0.715473	0.620457	0.886133	0.0370765	-0.0295546		0.641884	0.90206	0.066817	0.448063	0.241092	0.623382		0.515399	0.900893	0.377993	0.30884	0.530716	0.720029	0.890368	0.946536	0.493483	0.916031	0.996782	0.418009	0.853337	0.534125	0.340488	0.370294
797	AA669526*88C5	ubiquitin-conjugating enzyme E2L 3 UBE2L3	Hs.108104	0.628047	0.315766	0.292682	1.32369	1.4288	1.3934	0.414388	1.26497		0.808916	0.396597	0.883119	0.728016	0.874868			-1.0524	0.658492	1.27899	1.08076		-0.312037	0.342795	1.30543	0.769202	0.784424	1.1676	0.592647	0.732341		0.71741	1.462	0.441592	0.674674	0.485607	1.35834	0.747183	1.23593	1.11289	1.70856	1.0529	1.08266		0.792055	0.898125	0.611835
798	N50513*88C9	zinc finger protein 177 ZNF177	Hs.172979			-0.277071	-0.380034	-0.14056	0.341722	0.467406	0.959673		0.353393	-0.183932	0.487593						0.954235					0.0279998		0.934548			0.846469	0.369573	-0.438037		0.772851	-0.245144	0.997756				1.18544	-0.547684	0.186361		1.01231		1.33112		0.807777
799	AA425861*89C1	enoyl Coenzyme A hydratase 1, peroxisomal ECH1	Hs.196176	-0.244509	-2.75826	-1.00218	-0.127465	-0.595151	-0.715204	1.30056	-0.933732	-0.619613	0.0466522	0.0518513	-0.540736	-0.186324	0.0463497			-0.965818	-0.243033	-0.236738	0.61462	0.102472	0.686448	0.187726		0.244895	2.21591	0.206058	-0.239612	0.234282	-0.706893	0.345295	0.492598	-0.252009	-0.536907	-1.67903	0.130588	0.494193	-1.52407	-0.0758372	0.0146058	-0.429672	0.665028		-0.172707	-0.000405269	-0.319929
800	H08816*89C5	leucyl/cystinyl aminopeptidase LNPEP	Hs.166733	-0.370975	-0.228673	-0.558995	0.499634	0.637354	0.0895464	-0.613242	0.246348	1.20338	0.415508	0.708784	0.879718	1.10194	0.572221			0.813727	1.02323	0.229161	0.769853	0.930386	-0.525349	1.11057		1.26723	-0.148431	0.721839	0.374402	0.970136		0.245814	0.834645	0.214133	0.0608176	0.388474	0.622081	0.955993	0.0306346	-0.239747	-0.225486	0.973877	-0.343343		1.27001	0.348358	0.724595
801	R83277*89C9	origin recognition complex, subunit 1-like (yeast) ORC1L	Hs.17908	-1.18842	-0.23483	-0.796258	-1.34976		-0.246135	-1.03591	-0.76807		-0.477211	-1.54776	-1.21037	-1.6198				-0.385749	-0.78477	-0.618532	-1.34878	-0.955101	-1.11385	-0.419915		-0.680395	-0.709847	-0.93161	-0.700557	-0.656097	-0.965025	-0.463914	0.49638	-0.740469		-0.992259	-0.0971173	-1.16941	-0.551363	-0.671201	-0.691473	-0.541597	-0.662797		-0.7101
802	AA022666*90C1	IKK-related kinase epsilon; inducible IkappaB kinase	Hs.321045	-0.945307	-0.522175	-0.669439	0.416347	0.299632		0.45814	0.137522	0.644013	0.761146	0.341279	0.332426						0.985672	0.256445	0.630901	0.608063		0.28334		0.692445	0.710638	1.54676		0.641447	-0.00550674			0.857494	0.4821	-0.0349257	-0.193606	0.269124	1.57218	0.823894	0.403286	0.875729			0.096297
803	T56948*90C5	alpha-fetoprotein AFP	Hs.153834	-4.68623	-4.2779	-4.65184	-4.90278	-4.78805	-4.9602	-4.83164	-5.99189	-4.92462	-5.01514	-5.14379	-5.17121	-4.6644	-5.35162	-5.0551	-3.39159	-4.50024	-4.80596	-4.86868	-4.66942	-5.42616	-6.0679	-4.25561	-4.13875	-5.25207	-5.58602	-5.20513	-5.103	-5.42016	-3.95423	-5.39524	-4.75383	-4.45836	-5.09514		-6.70623	-5.39629	-5.29629	-5.14347	-4.32051	-5.466	-4.9219	-5.66517	-5.31468	-6.10768	-5.15747
804	AA001536*90C9	KIAA0087 gene product KIAA0087	Hs.69749		-0.585667	-1.02302	-0.630519	-1.0585	-0.353226	-2.10733	-3.49597	-2.42734	-2.05834	-1.43445	-1.20411	-0.428468		-1.76781		-0.810999	-0.607854	-0.654103	-0.1416	-1.79437		-0.662317	-1.06155	-0.434527	-0.182955	-0.20564	-0.815239	-0.462169	-0.556141	-2.39978	-0.382296	0.338686	-0.976955		-2.15258	-1.11662	-1.76984	-1.83122		-0.86429	-0.180058	0.288835		-0.760852
805	AA052932*91C1	casein kinase 1, gamma 2 CSNK1G2	Hs.181390	-0.283935	0.807486	0.0499604	-0.454674	-0.560627	1.25103	2.67474	0.389487	1.52723	2.19134	1.76382	0.556681	1.57309	1.64116	2.48807	1.36156	0.936774	1.26778	1.34926	2.40826	2.27364	2.08002	1.52284	-0.143228	1.2127	0.736011	1.76352	2.24831	1.81028	2.34112	1.80335	2.25731	1.43013	0.167631	2.03785	0.0976955	1.7395	0.0468076	1.02758	1.08667	0.197368	0.325444	1.96833	1.30628	0.127939	1.47805
806	H45976*91C5	catenin (cadherin-associated protein), alpha 1	Hs.150917				-0.203213	-1.251	-0.301225	0.616781			0.268518	0.0171468		1.29911		-0.366167			-0.131346	-0.154977	-0.183512	-0.483223			-0.22833		0.103852	0.370673	-0.285933	0.15571		0.73388	-0.0240443	0.217994			-0.374859			0.332937		0.0559629		0.514457	-0.213869		-0.28322
807	R43576*91C9	basic leucine zipper nuclear factor 1 (JEM-1) BLZF1	Hs.158205	-0.526727		-0.461422	-0.923129	0.361393	0.270005	-0.527365	0.44163	-0.0267149	0.0566684	0.686074	0.377344	-0.140416	-0.753356			-0.27051	-0.286132	-0.514701	-1.06608	0.578383	0.211768	-0.176573		0.175905	-0.671876	0.0348939	0.472575			-0.274711		0.602636	-0.151457	-1.08184	0.615378	-0.153953	1.55515	-0.570395	-0.412683	0.0244206	1.19108	1.43322	1.07581	-0.232695	0.412199
808	AA018676*92C1	protein kinase, AMP-activated, gamma 1 non-catalytic subunit PRKAG1	Hs.3136	0.171185		0.663086	0.0272971	-0.242637	0.441399	0.0153815	0.282982	0.280242	0.366425	0.132546	0.189599	0.65575	0.551637	0.863193		0.0484623	0.145682	0.122477	0.634476	0.286928	0.826565	0.286004	0.131356	0.861044	0.0325461	0.657775	0.581673	0.351609	0.527209	0.380337	0.747544	0.327059	-0.00318875	0.64399	0.491703	0.955573	0.751159	0.247718	0.482343	0.515737	1.50329	0.700121	-0.104362	-0.036693	-0.347577
809	AA699390*92C5	Novel human gene mapping to chomosome 12	Hs.184938	-0.656513	0.00320792	0.153885	0.131575	0.47859	0.082365	0.306959	-0.638936		0.644178	0.114909	-0.10782	0.381604	0.122553			-0.0948742	0.347675	-0.036201	0.192219	0.274223	0.669813	-0.130565		0.669045	1.60238	0.836725	-0.343052	0.401071		0.651148		-0.231344	0.203661		0.179529	0.311066	0.0268359	0.268383		0.122629	0.455739	0.397723	0.222346	1.35568	0.472375
810	AA669637*92C9	proline rich 2 PROL2	Hs.75969	1.33656	-0.311976	0.0224196	0.601669	0.255869	0.581935	0.768566	0.685408	1.13668	0.325039	-0.0225187	1.34903	0.983781	1.2154	1.05107	1.12716	0.484059	1.08958	-0.155461	1.43884	0.0394441	0.0147646	1.25854	0.971106	0.896713	-0.149075	0.052726	-0.336908	-0.574651	1.2614	-0.0882016	0.825694	-0.157751	-0.600481	0.193613	0.860513	0.349879	0.441711	0.497263	0.853708	1.44141	-0.391031	0.14769	0.560398	-1.08473	0.27281
811	AA683550*93C1	interleukin-1 receptor-associated kinase 1 IRAK1	Hs.182018	-0.51738	-0.115683	-0.163477	-0.240405	0.216167	0.723399	0.0198908	0.674112	-0.686298	0.0291039	-0.530063	-0.522976	-0.218148	0.821797	-0.56491	-0.483047	-1.07108	-0.134301	-0.523935	0.170676	0.0655178	-0.292134	-0.500117	-0.0591128	-0.406705	0.282133	0.279063	-1.00284	0.194905	0.146	0.288844	-0.293495	-0.771557	-0.195834	-0.256525	-0.309057	-0.317021	0.108	-0.598055	-0.267652	-0.540185	0.0667836	0.595789	-0.448014	1.059	-0.399568
812	AA406180*93C5	solute carrier family 22 (organic cation transporter), member 1-like SLC22A1L	Hs.50868	-0.612685	-0.157445	-0.32942	0.845788	-0.013968	0.290013	0.671949			0.531266	0.0382143	-1.10049	0.21332	0.808047	-0.620242		-0.077836	0.378347	-0.513728	0.86549	-0.0650669	-1.33931		-0.018785	0.348402	0.557058	-0.349586	0.109737	0.0404403		-0.289467	0.977064	-0.0143853	-0.526524	-0.299303	-0.292027	-0.843554	-0.795309	-1.04303	0.460733	-0.0429117	0.099434	0.528477	-0.243964	0.0886834	-0.517652
813	R59167*93C9	Meis1, myeloid ecotropic viral integration site 1 homolog 2 (mouse) MEIS2	Hs.104105	-0.53663	0.0991682	-0.636451	-0.800765	-0.153714	0.282799	-0.546925	-0.164474	-0.53504	-0.186358	-0.554261	-0.0618058				-0.403388	-0.375486	-1.07308	-0.41396	-0.911686	-0.675325	-0.226417	-0.369703	0.019084						-0.721887	-0.708792	-0.0987118	-0.353625	-0.339356	-0.226801	-0.249659	-0.0779354	0.171094	-0.490338	-0.372658
814	H68885*94C1	tumor suppressing subtransferable candidate 3 TSSC3	Hs.154036						-0.0122158	-0.312833	-0.325783			-0.0877211	-0.901265											-0.373117									-0.630592		0.260354						-0.656429
815	R44140*94C5	golgi autoantigen, golgin subfamily a, 1 GOLGA1	Hs.172647	0.156573	0.161659	0.129007	0.245521	0.499004	0.38581	0.856841	0.593127	0.0018571	0.529077	-0.130167	-0.255186	0.40231	0.214139	0.433912	0.0932752	-0.0478489	0.445685	-0.0886367	0.477449	-0.140953	-0.16977	-0.32761	0.272384	-0.114493	-0.108935	0.220413	0.403057	0.00369874	0.322082	0.0630365	0.824443	0.493422	-0.354022	-0.319637	-0.0191117	0.0795159	0.0382802	0.39369	0.0269058	0.0642632	0.0426837	0.117458	0.518036	0.285548	-0.261618
816	AA460688*94C9	neuropeptide FF-amide peptide precursor NPFF	Hs.104555		-1.28568	-1.03156	-0.686561	-1.15481	-0.302508	-0.812552	-0.855054	-0.0674396	-0.186205	-0.220993	-0.0735866				0.0904344	0.0330366	-0.413752	-0.898891	-0.62736	-0.585674	0.136202	-0.271648	-0.703661						-0.110483	-0.15447	0.728663	-0.544985	-1.14669	-0.135213	-0.838741	-0.28769	-0.0296811	-0.103982	0.631779
817	empty	SSC blank							-0.121779																	-0.416712
818	T64134*SPADESB9	small inducible cytokine subfamily A (Cys-Cys), member 12	Hs.11383		-0.627547	0.982248		3.50609		1.4799	2.02002		-0.0883882					0.654597			1.23429			1.61613			1.6084			-0.0144302					-0.269489		1.68503						0.591345	1.18247
819	AA015793*SPADESB17	v-myb avian myeloblastosis viral oncogene homolog	Hs.531941	-2.30249	-0.740247	-2.76699	-2.86038	-3.71111	-5.11126	-3.94479	-4.78627	-4.60786	-4.56401	-6.51358	-2.92244	-5.85199	-5.19844	-2.22868		-2.00944	-4.89152	-3.71587	-2.61761	-4.53795	-3.97356	-2.23029	-2.70174	-2.28046	-3.29808	-3.6782	-3.989	-6.76991	-2.02397	-1.68879	-3.54945	-3.30305	-2.78677		-6.16635	-3.03217	-6.32064	-5.19232	-2.55433	-3.86599	-4.59871		-5.8546
820	AA676797*SPADESF1	cyclin F CCNF	Hs.1973		0.940769	-1.10501	-0.559531	-0.672864	-1.6328	-0.0704955	-0.773657	-2.90956	-1.09609	-0.46638	-1.22937	-1.04723	-0.503061	-0.914777		-0.443591	-0.856008	-0.0835509	0.333744	-1.25745	-1.40449		-0.253597	-0.529403	0.757276	-0.230142		-0.40053	-0.488586	1.01019	-0.00710123		-0.174073		-1.30088	-0.936806	-2.07835	-0.635286	-0.894505	-2.45023	-0.588083		-0.446585		-0.308842
821	W63749*SPADESF9	B-cell CLL/lymphoma 2 BCL2	Hs.79241	-1.87247	0.31434	-0.775742	-0.381676	-1.13496	-0.147761	-0.504732	-0.490787		-1.42685	-1.54245	0.0902888		-0.0272507	0.37494		-0.262953	-1.2573	-0.929362	-0.482076	-1.49562	-1.98024		-0.559538		-0.670791	-0.533644	-0.943852		-0.115059	-0.393275	-0.339456		-0.700061		-1.24366	-1.67505		-0.608027	-0.470144	0.369378	-1.39918		0.675052		-1.33208
822	N21576*SPADESF17	cytochrome P450, family 24, subfamily A, polypeptide 1 CYP24A1	Hs.89663		-1.03588	-0.472176		2.74501	0.268503	-0.151859	0.330731	1.65783	2.57499	4.12179	5.06561	3.59626	3.1511				3.84008	3.69891	0.5421	0.278053	6.08679	4.2237	2.6396	5.36353	4.88887	-0.108223	-0.595708	4.19553	2.40996	2.59364	5.26158	-0.344786	2.76749		-1.04618	4.85871	-0.0644414		0.256729	1.43149			6.15648		0.860358
823	AA442853*SPADESJ1	cyclin-dependent kinase 5, regulatory subunit 1 (p35) CDK5R1	Hs.500015				0.450668		-1.44383	-0.293144	-0.300209		-0.982346	-1.26796	-0.39102		-0.972846	-0.513088	-0.904272		-0.33363		-0.481951	-1.06165		-0.0144748		-1.32036		-0.663348	-1.03017	-0.477609	0.190808	-0.719731	0.811985		-0.0402124			9.06e-05			-0.962053			0.156893	-0.59111
824	H84153*SPADESJ9	cyclin D2 CCND2	Hs.376071	-1.04807	-2.0709	0.720273	-1.13856	-0.437615	-1.09923	-2.41407	-2.58593	-1.5481	-1.53659	-1.23846	-1.71135	-0.219649	-0.77691	-1.92847	-0.295247	-2.23125	-1.87487	-1.89539	-0.826621	-1.82829	-1.67927		-1.0616	-0.794987	-1.88896	-2.10348	-2.63573	-2.18728	-1.70336	-1.64004	-1.57416	-2.16639	-1.87026	-2.17406	-1.19877	1.9666	1.62795	-0.907547	0.121212	-0.301632	-1.16441	-1.37525	-1.96553	-0.921969	-1.13509
825	R35665*SPADESJ17	epidermal growth factor receptor EGFR	Hs.488293	-0.0848123		1.86753	1.40641		2.46625	0.706343	2.31364	0.418248	0.878447	0.638237	0.703673	0.340291	0.85361	0.490749		-0.126793	0.130895	0.509237	0.539783	0.524915	-0.837141			0.201968	1.3903	0.331056	-0.285563	0.968928	0.829801	0.992265	0.767366	1.15688	0.769743	0.780898	1.60639	-0.0203401	1.23508	1.14722	0.876628	1.11965	1.32614	0.45459	-0.263647	0.587954	1.25412
826	empty	Data not found empty
827	empty	Data not found empty
828	empty	Data not found empty
829	N40945*95C1	phosphatidylinositol transfer protein, membrane-associated PITPNM	Hs.93837	0.88694	0.611758	0.503369	0.592435	0.918086	1.20303	0.800366	0.19716		1.3215	1.1865	0.463	1.63801	1.60172	1.30803	0.965651	-0.910415	1.1461	0.89105	1.95077	0.884711	1.58313	0.297618	1.56617	0.527289	1.73127	0.986536	0.618521	1.2211	1.57267	1.7238	0.859948	1.15847	0.71007	0.431887		1.63211	0.718995	1.00873	0.5951	0.754287	0.348759	1.09995	1.41644	1.46916	1.3231
830	AA676836*95C5	acid sphingomyelinase-like phosphodiesterase ASM3A	Hs.42945		-0.0011585	0.63198	2.08564	0.662296	0.613912	1.76353	0.247508	2.72084	0.124209	1.55611	1.35814	0.346534	1.04084	1.34674	1.20516	0.429506	0.492514	0.412192	1.05023	0.92706	-0.071446	-0.0457583		1.59497	0.850907	1.63417	2.71375	2.29026	1.24713	0.843111	0.424216	0.174348	0.354894		0.371539	1.46938	0.967068	1.67216	0.965549	1.22253	0.950819	1.3681	1.67611	0.073342	0.0666835
831	AA620859*95C9	sarcospan (Kras oncogene-associated gene) SSPN	Hs.183428	-0.071567	-0.00525522	-0.242916	0.288374	0.509422	1.0234	0.683934	0.0842465		0.305196	0.638921	0.431943	0.225308		0.56052		-0.782188	0.186618	-0.53262	0.533082	-0.285607			0.868095	1.77566	0.316152	0.596968	0.385446	0.521571	0.755224			-0.827089	-0.551016	0.278567	0.354508	0.909761	0.615781	0.503101	0.503644	0.693652	0.681479	0.966333	0.393951	0.850866	0.86706
832	R48303*96C1	dermatopontin DPT	Hs.80552	1.30503	0.977456	0.618814	2.57287	1.42567	0.549059	0.595387	-0.302259		0.131969	-0.126188	-0.081015	0.259099	1.40628	-0.0710802	0.286437	-0.080438	0.16581	1.04668	1.05217	-0.613467		-0.247838	0.634718	0.645576		0.764258	-0.0678541	0.380246	0.531123	0.0260907	1.2717	0.0620201	-0.0492593		1.57232	0.545069	2.8411	1.90375		0.983411	0.479411		0.0128761	0.375894	0.302864
833	AA670380*96C5	candidate tumor suppressor OVCA2 OVCA2	Hs.84183						0.000529355	-0.978925	-0.782543		-0.564085	-0.809189	-0.714357	0.287157		-0.648222			-0.371397			-0.915886			0.824507			-0.250546		-0.320259										0.182541					0.153128		-0.407983
834	AA680129*96C9	polymerase (DNA directed), epsilon POLE	Hs.166846	-0.468004	0.280313	-0.807981	-1.21698	-1.23876	-1.01056	-0.398978	0.503804	-0.847687	-1.68121	-0.769289	-1.23258	-0.423442	-1.17804	-1.45127			-0.991825	-0.436569	-0.727145	-1.15465	-1.3957			0.174585	-0.0815318	-0.60113	-0.755186	-0.952634		-0.652436		-1.06259	-0.471422		-1.67446		-1.23725		-0.736742	-1.16304	-0.85306	-1.04581	-0.407336		-0.116786
835	R55796*97C1	prodynorphin PDYN	Hs.22584				0.252757		0.955358											0.157417						-0.396274				1.07074		0.728673
836	AA291513*97C5	B-cell CLL/lymphoma 7B BCL7B	Hs.16269	-3.20036	-2.47417	-2.59884	-2.15512	-2.85357	-2.68446	-2.10448	-2.47383	-2.86098	-2.99	-3.50254	-2.88895	-3.0999	-3.27643	-1.77384	-2.6708	-2.5969	-2.87761	-2.7779	-2.92557	-3.92946	-3.2812	-2.25477	-2.29115	-3.44354	-2.76736	-3.33617	-2.98576	-3.12741	-2.52947	-2.89539	-2.48533	-2.71125	-3.13844	-3.12873	-2.94351	-2.44976	-2.29016	-2.5016	-1.88126	-3.03634	-2.55225	-2.61669	-3.64355	-2.74101	-2.84283
837	H45449*97C9	arylsulfatase A ARSA	Hs.88251	1.10111	0.455996	0.650465	0.628924	0.553251	0.637094	0.559174	0.440264		1.86497	0.463106	0.581174	1.33364	1.09336	0.309652	0.720457	0.039607	1.4907	1.11832	1.10643	-0.0285902		0.147009	0.870141	0.355807	0.707877	1.5848	0.200238	0.450873	0.947155	0.0580364	1.26802	0.407704	0.679678	0.282955	0.641006	0.520686	0.853241	0.676392	0.724129	1.05153	1.1993	0.743331	0.970719		0.716876
838	AA488175*98C1	flotillin 1 FLOT1	Hs.179986	-0.0279237	1.14122	-0.00343927	0.819685	0.462593	0.455595	1.6915	1.50687	-0.178914	0.937996	0.58139	0.00406175	0.358666	0.765069			-0.110263	0.603116	0.494742	0.873659	0.102558	0.0560878		1.02968	0.0533618	-0.0549044	1.1587	0.257831	0.66038	0.344618	0.85002	0.697694	0.142425	0.309955	0.107275	0.627877		0.428976	0.321079	0.433453	0.0923298	0.465025	1.09545	0.682109	0.935402	0.868233
839	H17413*98C5	Homo sapiens cDNA: FLJ21781 fis, clone HEP00222	Hs.246218	0.758408	1.10524	0.240031	-0.0058619	0.0930219	0.985108	-0.250412	0.381728	0.613345	0.391147	1.12864	0.361379					0.215195	1.32366	1.49665	1.00026	2.48166	1.62082	0.805273	0.43373						0.870056	-0.105427	1.05155	0.780115	1.65641	0.505759	-0.739108	0.833367	1.15034	0.174051	0.0203142
840	T62575*98C9	Homo sapiens cDNA FLJ13372 fis, clone PLACE1000706, highly similar to Homo sapiens transcriptional intermediary factor 1 gamma mRNA	Hs.168005	-1.07465	-0.0586773	-0.845399	-0.929922	-0.636936	-0.578113	-0.358068	0.247467	-0.0342788	-0.0101308	0.160504	-0.0759644				0.360956	0.213292	-0.266883	-0.416491	-0.834837	-0.0887888	0.0694021	0.0628683	-0.0644375						-0.348385	-0.527312	0.548229	-0.171766	0.08301	-0.274237	-0.541427	-0.205902	0.650114	0.149714	-0.236409
841	AA461098*107C1	LSM3 homolog, U6 small nuclear RNA associated (S. cerevisiae) LSM3	Hs.111632	0.0800305	-0.26903	-0.433955	-0.517925	-0.0747662	-0.781208	0.158768	-0.407284	-0.333384	0.097299	0.080152	-0.422798	-0.370797	-0.116696	-0.464228	-0.39773	-0.0949369	-0.394749	0.0395133	-0.544321	0.455637	-0.0846328	-0.134845	-0.647197	-0.246947	0.470755	-0.0700948	0.188754	-0.295677	0.753838	-0.0804966	0.289163	-0.166321	-0.467792	0.35284	-0.153703	0.148779	0.157901	-0.160301	-0.388468	-0.81955	-0.377591	0.42184	-0.546052	0.003754	0.361164
842	AA436008*107C5	Homo sapiens mRNA; cDNA DKFZp434M245 (from clone DKFZp434M245)	Hs.5288	0.292486			-0.504844	-0.245565	-0.661379	-0.224702	0.108389	0.458149	0.334662	0.132127	0.962051	0.244763	1.47549	0.50166	0.389713	0.213479	0.578361	0.387564	1.19577	-0.455453	0.560334	0.872134	0.356927		-0.621582	0.374353	0.767921	0.569113	1.02346	0.234192	-0.00434533	0.427094	-0.289457	0.564654	0.0829673	0.349235	-0.87244	-1.50524	1.03751	-0.00145532	-0.0795604	-0.130297	-0.000448673	-0.343631	-0.114306
843	T59678*107C9	hypothetical protein DKFZp761E1824 DKFZP761E1824	Hs.28564	-0.0644129		-0.0533369	-0.608359	0.972165	-1.23744	0.726091	0.381786	0.898711	0.535932	-0.525178	-0.14165	0.945589	0.536133	0.535591	0.667975	0.336458	2.08382	0.401649	-0.0711838	0.404801	-0.299188	-0.0828585	1.16054	-0.620801	1.26421	-0.121307	0.537009	0.814749	0.814891	-0.448876	2.23597	0.347492	0.280494		-0.378368	0.200068	1.23672	0.726511		-0.0755976	-0.631659	0.411795	-0.0112613	-0.041588	-0.649373
844	T46979*108C1	KIAA1402 protein CSGlcA-T	Hs.86392	0.667969		-0.15257	-0.331223	-0.30396	-0.922664	0.0846723	0.949608		0.489263	0.470741	-0.238332	0.439642	0.373689		-0.297504	0.197027	0.625669	0.333904	-0.242525	0.410446	0.000635602		0.299814	1.17131	0.388918	0.319728	0.313787	-0.0772875		-0.298081	1.26006	-0.0822268	0.547007		-0.148513	0.899734	-0.271393	-0.434768		0.194595	-0.306676		0.204235	0.120903
845	AA486747*108C5	Ig superfamily protein Z39IG	Hs.8904	0.532243	0.192193	0.673786		-0.0578301			0.231068		-0.598943					-0.156425		0.283182	0.495801	-0.1168													-0.485222				-0.0799312
846	H09971*108C9	ESTs	Hs.90363	0.210839	0.447767	0.771327	-0.135359	0.348341	-1.4603	0.705236	0.453712		0.313589	0.884977	1.07903	-0.284805			-0.689905	0.0933373	0.565427	0.397444	0.820626			-0.304955	0.46237	-0.0603818	0.0286972	-0.117394	-0.171481	0.804044		1.06432	0.337834		0.261961		0.150821	1.24515	1.6156	0.752907		-0.0716657		-0.381404	0.519334	0.128937	0.623417
847	H80138*109C1	H80138		-0.120353	-0.0902826	-0.031793	-0.481271	-0.144943	-1.26187	-0.741534	-1.28179		-0.675264	-0.225761	-0.322096	-1.15386		-0.711676		0.0708947	-0.308805	-0.0799024	-1.12424	-0.0623277		-0.248339	-1.04554	-0.678509	-0.114441	-0.898625	-0.264543	-0.338402	-0.165139			-0.0921082	-0.45483			-0.510028	-0.0323902	-0.0318464	-0.29662		-0.957217	-0.336235	-1.39602	-0.392234	-0.295104
848	AA192166*109C5	myosin, light polypeptide 3, alkali; ventricular, skeletal, slow MYL3	Hs.517939	0.532243	0.0115785	0.209125		-0.337282	-1.51836	0.164153	-0.285009		-0.884978					-0.507501	-0.322839	-0.025398	-0.153408	-0.158892	0.478087	-1.07833		-0.759746	-0.492632					-0.4053	0.418788				-0.333328
849	AA219045*109C9	microtubule-associated protein 1B MAP1B	Hs.103042	-0.849942	0.929697	-0.512962	-0.657112	-0.40734	-0.109905	-0.0386863	-0.391155	-0.0106894	-0.0118728	0.220602	0.221041	-0.0400472	-0.000847806	-0.508532	-0.0739321	-0.00908253	-0.027135	-0.114063	-0.318569	-0.129681	0.407457	-0.307577	-0.0648755	0.135384	-0.186026	-0.197397	-0.801068	-0.281836	0.141878	-0.249659	0.288051	0.0371277	0.143963	0.237874	0.00195201	0.201525	0.0119635	-0.0365129	-0.145769	-0.190956	0.667682	-0.473838	-0.165069	0.196056	-0.701138
850	AA620553*110C1	flap structure-specific endonuclease 1 FEN1	Hs.4756	1.20179	0.971958				0.796245	0.216919	-0.226255		0.0976284		0.68247	2.89703		0.604474		-0.125693	0.653709		-0.170653	-0.215688			0.580516	2.1523	1.53461	1.54571		1.56876	1.21688		0.393475		0.294358					0.624364	0.090084	2.00846	2.17491	2.51164	1.94164	1.25584	1.41982
851	AA608537*110C5	Homo sapiens cDNA FLJ14028 fis, clone HEMBA1003837	Hs.281434	-0.202698	0.611918	0.454795	0.0252994	0.0634546	-0.362054	-0.579315	0.562003		-0.0147442	-0.714249	-0.162477	0.0943766	-0.406399	-0.45038	-0.129702	-0.101232	-0.134346	-0.270673	-0.217474	0.0678227	-1.48812	-0.40507	-0.0237677	0.749238	-0.437459	-0.280713	-0.144909	0.224335	0.664021	-0.591385	0.518487	-0.0552306	0.0763578	-1.82575	-0.0991194	0.284727	-0.541637	-0.438393	-0.340996	0.237369	-0.0700312	-0.296156	0.155186	-0.388068	-0.234578
852	AA621018*110C9	hypothetical protein FLJ20370	Hs.267566		0.459968		0.121177	0.0028153	-0.062724				-1.58401			1.32803	0.994555	0.618688		0.370107						-0.605637		1.12089		-0.811229	0.665227	0.115261											0.0564104		0.0848735	0.556962	-0.408163	0.144213	-0.347338
853	AA884709*177C1	cytochrome P450, family 11, subfamily B, polypeptide 1 CYP11B1	Hs.301118		0.688865	1.45075	0.870951	0.462769		1.16797			0.743618	0.75372	0.181392			0.615123	0.608238	0.105512	0.541398	0.296507												1.14236		0.616125	0.904186			1.5992	-0.080165		-0.0524237
854	AA885210*177C5	ets variant gene 2 ETV2	Hs.194061	-0.152761	0.267498	0.00729712	-0.00397444	0.49802	-0.228318	0.603339	0.638855		0.249562	0.0799093	0.311436						0.0186094	-0.363006	0.224815	0.012203		0.378783		0.251891	0.237061	0.621756	-0.169782	0.166649		0.112632	-0.0481462	-0.152671	-0.219672	-1.51068		0.418103	-0.648335	-0.0238539	-0.15045		-0.446565	-0.365429	0.19293
855	AA844930*177C9	glycoprotein 2 (zymogen granule membrane) GP2	Hs.53985	-0.183056	0.621857	0.453979	-0.273567	-0.0741046	-0.0113106	-0.101255	0.412441	0.0545432	0.454523	-0.575958	-0.176255			-0.122253		-0.297625	0.312873	-0.0461042		0.0707955		0.260544	0.163691	-0.342334	0.0917215	0.354446	0.617047	-0.562743	-0.480318	-0.69524		-0.0296748	0.159911			-0.496246	-0.230949	-0.824529	-0.347113	0.19663	0.0243064		-0.136694		0.854289
856	AA777192*178C1	laminin receptor 1 (67kD, ribosomal protein SA)	Hs.181357	-0.0804553	2.38072	-0.0825799	0.379108	0.182199	-0.191026	1.4883	0.580444	-0.348636	0.161687	-0.257883	-0.122599	0.0790538	0.240736	0.380973	-0.615432	-0.460421	-0.339876	0.554815	0.401491	0.136446	0.978651	0.0162548	-0.636649	0.369865	-0.362817	0.0846839	0.876266	0.470909	-0.466315	1.02413	-0.594523	-0.108944	0.361667	0.0692573	-0.370656	-0.359919	0.50572	-0.0728787	-0.0101804	-0.851939	0.259764	1.0059	0.209844	0.152756	0.226175
857	AA733105*178C5	protein tyrosine phosphatase, receptor type, D PTPRD	Hs.158112	-0.277392	0.777148	-0.22158	-0.0415849	-0.103512	-0.138493	0.968969	0.334753	0.131045	0.117171	-0.0470352	-0.145341	0.249017	-0.512689	-0.147904	0.206717	-0.532795	0.123541	-0.282725	0.11113	0.200581	0.0160916	0.157995	-0.239389	0.170075	0.00348102	0.588436	0.173704	0.294248	0.187165	0.360203		-0.103248	-0.303896	-0.884902	-0.385713	-0.225286	-0.282063	-0.0100918	-0.146236	-0.598547	-0.576168	-0.4107	0.39561	-0.47053	0.0264605
858	W88740*178C9	coilin COIL	Hs.966	-0.651354	0.36803	-0.425586	-0.631177	-0.449582	-0.57621	-0.0268897	-0.0417095	-0.683705	0.103757	-0.242534	-0.224856	-0.342882		-0.112857		-0.318217	-0.512098	-0.34712		0.258897	-0.512965	0.177943	-0.732621	0.541056	-0.427273	0.694121	0.18895	0.307289	-0.478666	-0.695334		-0.117529	-0.0726107	0.412825	-0.480748	-0.322247	-0.268356	-0.0548168	-0.391217	-0.710355	0.235172	0.491148	-0.601488		-0.147235
859	AA187143*179C1	IGF-II mRNA-binding protein 3 KOC1	Hs.79440			1.6448			-0.347202																	-0.335732																0.126545	-0.240045
860	AA772803*179C5	adenylate cyclase activating polypeptide 1 (pituitary) ADCYAP1	Hs.68137	0.640998	0.748688	-0.00136942	-0.0634899	0.0208905	0.59989		-0.455094	0.213105	0.372145	0.239277	0.419074	0.338241	0.184873	0.654158			0.0411161	0.22408		0.129526	-0.141559	0.385494	0.383225	-0.293184	0.286203	0.229286	0.204644	0.105273		-0.132394		0.138678	0.573733	-0.449918	0.68506	-0.0396607	0.0526438	-0.475608	0.393272	0.0299854	-0.0579678		0.749649
861	AA857035*179C9	biliverdin reductase B (flavin reductase (NADPH)) BLVRB	Hs.76289	0.439342		1.07108	2.3309	1.20604	0.600233	2.51147	1.13741	-0.558898	0.765001	1.2826	0.331687	0.865587	1.34967	2.25157		-0.454508	-0.416946	0.755752		0.193522	1.73533	1.10455	0.0646435	-0.0916035	2.78357		1.93222	1.31638	-0.13704	0.805257		0.267903	0.199144	0.781785	2.13074	-1.15118	-0.796425	0.433305	1.49743	0.487611	2.23294	2.38813	0.943057	1.26682	0.617783
862	W76339*180C1	nuclear factor (erythroid-derived 2)-like 3 NFE2L3	Hs.22900	-0.885655		-0.945513	-1.16731	-0.747065	-0.772203	-0.383908	1.33962	0.553093		0.0558498	0.459843	0.170757	-0.736143	-1.11178	0.101583	-0.587387	-0.407692	-0.242176	0.593764	-0.164263		0.0436518		0.0725811	-1.09147		0.394079	1.11778	1.34253	0.541017	0.430922	0.290605	-0.286281	1.08669	-0.642472	-0.304325		0.0865273	0.0234658	0.229396	-0.220836	-0.365438	-1.03034	1.22794	0.0589903
863	AA055440*180C5	sprouty homolog 1, antagonist of FGF signaling (Drosophila) SPRY1	Hs.88044	1.44874	1.32343	0.551441	0.795285	0.196724	0.338947	0.610835	-0.307569	0.308258	0.468983	-0.0429654	0.728122	0.798211	1.70769	0.364555		-0.103278	-0.327523	0.703394	-0.281715	0.405341	0.868913	1.32144	0.957789	-0.237078	-0.155788	0.88778	-1.04013	0.302605	1.34522	0.982894	1.71016		1.1067	1.84715	0.886742	0.712165	0.248984	0.414875	1.26404	1.19257	-0.0737934	1.74014	1.46382	0.265823	-0.129838
864	AA778346*180C9	HMT1 hnRNP methyltransferase-like 1 (S. cerevisiae) HRMT1L1	Hs.235887	-0.254585	1.0816	1.03131	-0.192608	0.0203617	-0.0720264	1.52663	0.590712	0.174141	0.826317	0.025313	0.0365468	0.86116		-0.382985		0.0214284	0.689684	-0.242858	0.930677	0.927435	0.553516	0.941929	0.219557	-0.758776	-0.183242	-0.383367	0.248731	0.33718	0.676336	0.513054	1.22902	0.292409	-0.616385	0.571345	-0.190136	1.23708	0.0327906	-0.312226		-0.175292	-0.809412	0.325192	0.12808	-0.128447	-0.036211
865	AA709414*181C1	nidogen (enactin) NID	Hs.62041	0.747039	-0.703215	-0.420732	-0.802428	-0.899104	-0.222693	-0.360491	-0.559719	-0.959201	-0.0914192	0.6121	0.241868	-0.627797	-0.905147	-0.32557	-0.307595	-0.0682555	-0.871183	-0.795167	-1.07533	-0.538679	-0.191076	-0.29661	-0.35691	-0.782838	0.602534	-0.356127	-0.59674	-0.522501	-0.127706	-0.375327	-0.628202	-0.941954	-0.662787	-0.272438	-0.139577	-0.653643	-0.0108794	-0.422014	-0.413574	-0.517802	-0.094684	-0.642634	-0.377576	-0.141226	-0.138705
866	AA620715*181C5	gamma-glutamyltransferase-like 4 GGTL4	Hs.284380	0.154796	-0.520947	-0.694243	-0.13105	-0.0751204	1.24133	-0.691399	-0.448505	-1.43209	0.467266	-0.392756	-0.547244	0.372598	1.75808	-0.333647		0.102094	-1.13886	-0.0515963	-1.43006	-0.542251	-1.09499	-0.633173	-0.638428	-0.898568	0.358699	-0.190789	-1.9227		-1.28638	-0.62265	-1.08382	-0.0545324	-1.15967	-1.35359		-0.85455	0.394492	-0.0417389	-0.284237	-0.709171	-0.232561		-0.873219	-0.924367	-0.425938
867	AA778663*181C9	tumor necrosis factor (ligand) superfamily, member 9 TNFSF9	Hs.1524	0.799512	0.313561	-0.170302	-0.197497	0.457599	2.75169	-0.0446872	-0.130122	-1.03476	0.236599	0.170993	-0.395974			-0.652705		0.0789977	-0.169878	1.20671	0.81356	-0.171152	-0.081113	-0.748658	-0.173781	-0.0744912	0.0707905	0.447342		-0.357494	0.662202	0.436368	0.0191245	0.0651803	-0.226094		0.342157	-1.14894	0.269181	0.190108	0.387516	1.43675	0.527216	-0.352515	-0.629958		-0.441935
868	R88709*184C1	PRO2463 protein PRO2463	Hs.90421	-0.639615	0.207785	-0.644726	-0.778735	-0.355792	-0.943908	-0.772424	0.698384	-0.867962	-0.606563	-0.686807	-0.459982	-1.29301		-0.721468	-0.656604	0.146621	-0.562729	-0.309228	-1.60504	-0.0746469		-0.511332	0.18836	-0.00027938	-0.857436	-0.400204	1.13143			-0.910756	-0.299063	0.0388486	-0.395483		-0.433931	-0.585303	-0.107095	-1.02302	-0.5639	-0.924085	0.210674	-0.369413	-0.882292	-0.623604	-0.956474
869	R92034*184C5	karyopherin alpha 6 (importin alpha 7) KPNA6	Hs.301553	0.845506	1.64932	0.45058	-0.0748547	0.725317	0.903682	1.67314	0.248825	0.620256	1.41612	0.298256	1.08807	1.56264	1.47459	0.438551		0.34279	1.43805	0.831605	1.34374	1.3977	0.16177	0.869521	0.111721	0.570325	0.934891	1.08159	-0.669416	1.72426	0.34437	1.29594	-0.447422	0.809838	1.2616	1.51363	0.620237	1.79356	0.582564	-0.275458	0.857272	0.00323269	1.72455	0.960772	1.13215	-0.378538	-0.473473
870	R89490*184C9	ESTs R89490	Hs.268835	1.39404	1.00395	1.62546	1.03643	0.959791	3.33113	1.41803	1.01755	0.996516	1.14613		0.721563			2.31549		0.293692	0.345353			1.19215	1.355	3.11235				3.283	3.69882	2.21273		1.05063				1.09551	0.455879	1.23719	1.73647	1.28747	0.62661		3.57427		3.47776	4.72569
871	AA455242*182C1	signal recognition particle 68kDa SRP68	Hs.273307	-0.0519507	0.195666	0.0815688	0.021567	-0.042492	-0.554723	1.04656	0.594555	0.264455	0.294755	0.384139	0.130035		0.285983	0.807891	-0.20641	-0.318938	-0.219708	0.128225	0.674098	0.330458	0.813477	0.454053	0.145195	0.504429	0.514007	0.373525	0.305052	0.743634	0.0530591	0.804557	0.491568	-0.169043	-0.331722	0.977519	0.430904	0.256535	0.0735701	0.423098	0.127736	-0.27508	0.378734	0.522334	0.481621	0.1925	0.133901
872	AA485214*182C5	nucleobindin 2 NUCB2	Hs.3164	-2.01048	-2.21177	-2.49284	-2.19553	-2.69281	-1.58887	-1.70352	-2.84859	-4.70502	-3.01335	-3.50467	-3.44543	-3.60644	-2.43196	-3.4971	-2.98711	-2.64	-3.90291	-2.89688	-4.26809	-2.70053	-2.87811	-2.51933	-2.27381	-3.37988	-3.16429	-3.16291	-1.1216	-3.87343	-3.09778	-3.35221	-2.17253	-2.50346	-3.21819	-3.31383	-2.48954	-3.80937	-2.37342	-2.21537	-2.04328	-1.65341	-1.56903	-1.46556	-2.39719	-2.3724	-3.69991
873	AA491261*182C9	hypothetical protein FLJ11149 FLJ11149	Hs.37558	-0.580009	0.576589	-0.423461	-1.24283	-0.675159	-1.04546	-0.6042	0.0431412	-1.88176	-1.30325	-1.30557	-1.33514	-0.611266	-1.38354	-1.27998	-0.661025	-0.19683	-1.17368	-0.991527	-2.25974	-1.25758	-1.24302	-0.848186	-0.857108	-0.988918	-0.611697	-0.951229	-0.612236	-1.03279		-1.33323		-0.778415	-0.934403	-1.39331	-1.14819	-0.999443	-0.763348	-0.894277	-1.11012	-0.942278	-0.623386	-0.435701	-0.799683	-0.783626	-0.906915
874	N63940*183C1	acetylcholinesterase (YT blood group) ACHE	Hs.154495	-0.517706	0.365312	0.20797	-0.216708	0.120331	-0.362728	-0.425427	-0.661153	0.287311	-0.0914565	-0.600485	0.101282	0.481759	-0.418656	-0.629531	0.155185	-0.303565	0.326504	-0.22327	-0.224471	-0.242005		-0.229263		0.116546	0.100556	-0.307671	-0.947202	0.0710366		-0.488698	-0.103116	-0.64977	-0.23933	-0.275271	0.358007	-0.481998	0.146773	0.111586	-0.332848	-0.0597315	0.0939006	0.235761	-0.718011
875	AA199733*183C5	ESTs	Hs.188697		-0.679306		0.134502	0.0369334	-0.538895	-0.727555	-0.504098	-0.331306	-0.227734	-0.26406	-0.465101	-0.0455128		-0.302004		-0.23995	-0.430915	-0.38412	-2.17334			0.0782212				-0.25787		0.250515		-0.710747		-0.0967154	-0.459648		-0.440901	-0.655402	0.237518	-0.241097	-0.332626			-0.828273	-1.22874
876	AA598844*183C9	ESTs, Weakly similar to Attractin [H.sapiens]	Hs.112492	4.25021	1.09303	1.18825	-0.0845317	-0.595968	1.02536	-1.48641			-0.708095					0.15225		0.126411	-0.584073	-0.309832				0.1895				1.70077						0.390804	-0.782159						-0.417663
877	AA953973*220C1	KIAA0610 protein	Hs.118087	-0.484138	0.437793	-0.0820858	-1.17215		-0.788534	-0.0817712	-0.565556	0.295067	-0.357218	-0.0152414	-0.38553	0.597524	-0.718612	-0.968526		0.229366	0.251694	-0.550977	-0.694585	-0.396259	0.701956	0.444793		-0.798979	-1.59532	-1.5963	0.722733	0.130205	-0.442954	-0.590103		0.290772	-1.46991	-0.970892	0.452018	0.584631	0.180738	-1.08336	0.264016	0.100667	0.284425	0.564604	-1.34697		-0.361535
878	AA968896*220C5	midkine (neurite growth-promoting factor 2)	Hs.82045	2.40915	1.63463	0.786079	-0.172875		1.48249	1.41238	-1.1349		0.479057	-0.17842	-0.636356	1.64592	1.71029			-0.542919	0.88654	0.04974	1.35463	-0.0825943				1.48809	1.1922	0.897244		1.33306		0.347677		1.09318	-0.946452					0.608841	-0.122761	0.741291	1.15439		1.73785		0.979285
879	AA969504*220C9	interferon, gamma	Hs.856				-0.306416			-0.698619			-0.762667	0.546629	-0.223523			0.0392807		-0.268331	-0.213348	-0.0365721								0.293463						0.0909038	-0.450542												-0.468164
880	R38360*221C1	hypothetical protein	Hs.145567																		0.272426															0.0787016
881	AA777034*221C5	brain-specific angiogenesis inhibitor 2	Hs.200586	0.0393527		0.398726	-0.253862		0.308722		-0.329827		-0.0326454	0.461209	0.0946623	2.15496				0.185719	0.322884	-0.640375					0.125562	1.32248	0.748977	1.58449		1.25167					-0.0487555										1.6514	0.253522	0.70125
882	AA669600*221C9	ESTs	Hs.196244						0.10007																							0.129794
883	AA705264*222C1	F-box only protein 4	Hs.49210							0.734491	0.806299		1.406		0.381452					0.126975																		0.560762	0.353319				-0.146444
884	AA779931*222C5	Homo sapiens, Similar to RIKEN cDNA 1700073K01 gene, clone MGC:12458, mRNA, complete cds	Hs.330664	0.0675213	-0.712964	-0.708419	-1.37649	-1.24873	-0.0501797	-1.152			-1.2033	-1.73835	-2.37713	-0.137372	0.658078	0.246926	-0.358976	0.101277	-1.22088	-1.05501	-0.57812	-1.15498	0.146886	-0.325992	-1.6458	-0.481026	1.34119	-1.39684	0.283348	-0.58566	-0.714163	-0.833197	-0.832158	-0.416909	-0.905867			-0.758715	-1.71457		-1.30608	-0.944161	-0.597771	1.17979	-0.717536	0.807605	-0.481018
885	AA779947*222C9	chromosome 14 open reading frame 1	Hs.15106	0.35272	-0.472967	-0.78026	-0.448616	-0.532751	-0.317995	0.105598	-1.17805	0.0479337	-0.599265	-1.00695	-1.12933	-2.29048	-0.879143	-0.0664954		0.115403	-0.574367	-0.228349	-0.461879	-1.24171	-0.406598	-0.627835	-0.767787	-0.788848	0.512326		-0.639084	-0.188548		-0.532392		-0.963293	-0.678019	0.065076	-1.95035	0.0374767	-1.34772	-1.21128	-0.997945	-1.18872	-1.00917	0.0505637	-0.924847	-0.872779	-0.579153
886	AA099593*223C1	KIAA0977 protein	Hs.300855	0.350404	-0.275109	-0.110728		0.32951	0.601837	1.78429				1.91296	0.972001	2.01657	1.18144	1.16968		0.736494	0.769443	0.405175	1.05439	2.31225		0.527243		0.947752	0.651257	0.536254	0.700286	2.92537		0.480881	1.3583	1.3586	0.640644	2.77815	0.452298	0.277044	1.54948	0.743939	2.36625	0.317397	0.314701	0.96713	1.40776	-0.112964	1.13427
887	AA101777*223C5	methylcrotonoyl-Coenzyme A carboxylase 1 (alpha)	Hs.47649	0.457931	0.256406	0.78386	0.411366	0.283851	1.69032	1.52169	-0.414774	1.86471	0.359475	0.935441	0.294179	2.23925	2.25898	2.33618	1.54013	0.680372	1.57161	-0.0809694	0.924468	1.21194	1.34065	1.42126	-0.0257934	1.00621	1.74545	1.23804	1.50164	0.949213	1.58563	1.29717	1.35946	0.740106	0.557444	1.41944	-0.060333	1.39529		0.743422	1.20057	1.28009	1.0798	2.50161	1.40231	1.06137	1.71535
888	AA122265*223C9	thyroid hormone receptor-associated protein, 240 kDa subunit	Hs.11861	-0.323003	-0.0801415	-0.0442331	-0.306981	-0.672666	-0.261625	0.0966916	0.324124	0.41427	-0.277823	-0.322749	-0.231205		-0.567044	0.105807		0.0545933	0.0382051	-0.457854	0.0781001	0.0586664	-1.03687	-0.15623		0.460735		0.288291	0.476435	0.180886		0.248795		0.431396	-0.244393	-0.0516547	-0.188642			-0.397285	-0.483641	-0.379657	-0.298572	-0.146179	0.240917	-0.581164	-0.16887
889	AI024865*288C1	ESTs	Hs.127929		0.914119	0.668388	1.07575	0.726119		0.737655			0.306592					0.561613			1.24494					-0.249749					2.84718												-0.250229
890	AI014965*288C5	ESTs	Hs.130940	0.151103	0.400686		0.333798		0.712365	0.590036	-0.318091		0.23966	1.25779	0.732406					0.32431	0.375928	-0.525108	-0.702957	0.373897		0.0702736										-0.977197	-0.0322388	0.209596	-0.145084		0.147201	-0.137069			0.614901
891	AI015815*288C9	EST	Hs.131023	0.663255	0.71091	0.694744	0.44273	0.159582					-0.850005							0.285617	0.456847					-0.376732				3.44776							0.507917
892	AI024698*289C1	Hypothetical protein DKFZp761D221 (DKFZp761D221)	Hs.132121	0.88652	0.261344	1.16777	0.735322	0.0135069	-0.458934		-0.552567		-0.812493			1.9352				0.651706	-0.468421	0.656855														-0.363959	0.580019						0.407813					-0.438184
893	AI023837*289C5	ESTs	Hs.129965	-0.0369802	-0.36071	-0.114334	-0.610509	-0.5864	-0.320107	-0.395776	-1.40649	-1.08494	-0.254794	1.14229	-0.231881	-0.531336	-0.942602	-0.10064	-0.0117176	0.420806	0.09392	-0.470566	-0.90453	0.402673	-0.159615	-0.630968	-0.933245	-0.492035	1.18333	-0.755069	-0.353846	-0.723072	-0.417786	-0.983301		-0.991763	-0.337376		-1.30393	-1.04291	-1.13811	-0.519875	-0.916014	-1.00485	-0.334702	-0.181164	-0.352789	-0.216121	-0.160544
894	AI024272*289C9	ESTs	Hs.112693	-0.143932	-0.919972	-0.620107	-0.743365	-1.16252	-0.387779	-1.54672	-3.61705	-0.952022	-1.81656	-2.31971	-1.87568	-0.877075	-0.60917	-0.685029		0.504811	-0.985327	-0.946989			-1.84185	-0.897393	-2.39228	-1.15429	0.611147	-2.01719	-1.52525	-1.27177	-1.97996	-2.43292		-0.563268	-1.10246			-1.8632	-1.72102	-1.60735	-1.36392	-1.17718	-1.21122	-0.602328	-1.08464		-0.964869
895	H65334*290C1	ZAP3 protein	Hs.159471	-0.329447	-0.564941	-0.451804	-0.873243	-0.833211	-0.168015	-1.56611		-0.130248	-1.50503	-1.69247	-1.27195	-0.244593	0.185527	-0.871477		0.217183	0.528252	-0.330419	-1.81438	-1.1589	-0.988478		-1.87562	-0.692732	0.0577764	-1.72016	-0.470341	-0.862559		-1.33763		-0.372859	-0.18499		-2.17976	-1.2942	-1.57279	-1.49806	-1.54036	-1.30527		-0.37683	-0.512496		-0.595532
896	R21530*290C5	minichromosome maintenance deficient (S. cerevisiae) 4	Hs.154443	-0.347185	0.911596	-0.222034	-0.413489	-0.0453247	-1.00827	0.682142	0.707327	-1.39927	-0.507837	0.00571084	-0.448583	-1.19845	-1.03596	-0.429504	-1.04337	-0.81398	-1.47829	-0.392642	-1.24408	-0.575277	0.0820086	-0.783102	-0.362173	-0.137479	0.18128	0.114233	0.674215	-0.0694535		0.126573		-0.751485	0.344864	-0.147356	-0.186337	-0.514412	-0.190948	-0.107178	-0.930287	-1.95003	0.596971	-0.353664	-0.404407		-0.37885
897	H72864*290C9	nuclear receptor subfamily 5, group A, member 2	Hs.183123	-0.213537		0.411853	0.804205	1.14201					0.0704449						0.850943	0.260389	1.06394	0.631505								1.72024						0.467202	1.40024
898	T57321*291C1	T57321	Hs.417549	-0.520792		-0.0681985	-0.55947	-0.572088	0.128523	-0.0874388	0.246496	-0.734315	0.0244175	-1.19575	-0.779321	-0.781493	-0.48644	-0.569912	-1.14822	-0.567816	-0.632802	-0.385261	-0.372176	0.538222	-0.801918	-0.201364	0.0395379	-0.857277	-0.535974	-0.0647226	-0.847643	0.331573	-0.81156	-0.355672		-0.317322	-0.777608	-0.457189	-0.598553	-0.883979	-0.900108	0.217967	0.0311162	-0.0198399	-0.588128	-0.548285	-1.19138	-0.884911	-1.4689
899	AA489363*291C5	erythrocyte membrane protein band 7.2 (stomatin)	Hs.160483	0.192318	-0.808172	-0.537695	0.814453	0.675226	0.406404	-1.25141	-1.5161	-2.32709	-1.15974	-0.965692	0.268864	-1.17813	-0.878852	-0.547254	-0.154651	-1.49143	-1.16637	0.113816	-1.56365	-1.37086	-0.893128	-0.667981	0.835962	-1.82481	0.598082	-1.07654	-0.431024	-0.243486	0.0490893	-0.937612		-0.399014	-0.469895	0.143529	0.949023	-0.169522	0.476802	0.686927	1.06091	0.788975	-1.02211	0.844014	-0.294765	0.541901	-1.13138
900	AA598631*291C9	spermidine/spermine N1-acetyltransferase	Hs.28491	0.583224	-0.224589	0.336414	1.23522	0.64746	1.15026	1.94702	0.746067	-0.305044	-0.892604	-1.73024	-0.334953	-1.01633	-0.697686	-0.572675		-0.15777	-0.605753	0.143544	-1.65806	-0.0692469	-1.24991	-0.148643	1.16668	-1.29414	0.119951	-0.331728	-0.811933	-0.739374	-0.601062	-1.78995		0.389737	0.470266	0.720417	0.617373	-0.204864		0.299782	0.290433	1.27962	-0.719689	0.250893	-1.45522	-0.744208	-0.878557
901	AA033807*292C1	procollagen (type III) N-endopeptidase	Hs.183138						0.228837	0.62559	0.385258	0.010698	0.371703	-0.261412	-0.492278				-0.501628	-0.500473			1.20992	-0.574166	0.0813826	-0.0194102	-0.410413	-0.0909326	1.00732	0.817746		0.351395		0.0614404					0.302622	0.0324975	-1.56682		-0.0875669	-0.468233	0.421357		0.571283
902	AA397895*292C5	protein phosphatase 2, regulatory subunit B (B56), epsilon isoform	Hs.173328	-0.085571	0.160477	-0.149889	0.018387	0.196495	0.52742	-0.0368748	0.201044	0.0688856	0.0070972	-0.189748	0.04921	-0.346099		0.126987	0.0423364	-0.139262	0.11912	-0.350541	-0.802846	-0.418353	-0.731154	0.254056	0.12084	-0.0714388		-0.10886	0.313026	-0.547914		-0.699998	0.114141	-0.457478	-0.184083	-0.962919	-0.253494	-0.128808	0.113147		-0.156358	-0.293718	-0.590352	-0.120343	0.129318	-0.275449	-0.00546512
903	H84722*292C9	crystallin, alpha A	Hs.184085		0.101948		1.52244	1.78098		2.03306	0.953533	4.11545	2.34776	1.91792	2.86241				0.699128	0.344742	4.02982		3.6077	2.0455		1.57514	1.63652			2.86078				2.31146		2.44113	3.30675			1.83616	2.57381		1.85841				3.29175
904	H05775*293C1	monoamine oxidase A	Hs.183109	-0.808046	-0.789966	-0.0786733	1.44067	0.927884	-0.172292	2.02613	1.9164	3.35925	3.34222	2.39827	2.56489	2.83368	4.05861	3.92715	2.92665	1.21222	2.91426	1.85956	3.20829	3.99919	3.49625	1.90268	1.90647	2.34371	2.69731	2.10008	1.87588	3.08616	3.24873	2.19223	2.3227	1.73322	2.75232	2.66287	1.60406	2.63214	1.323	1.40042	3.56226	1.83997	0.807888	1.21794	2.94449	-0.133609	-0.427983
905	AA598555*293C5	protein tyrosine phosphatase, non-receptor type 3	Hs.153932	0.613629	0.161125	0.184478	0.111029	0.248184	-1.19481	0.914264	0.677371	1.58794	1.068	-0.147768	-0.299941	0.702837		0.591414	-0.00472534	0.442381	1.26537	0.273307	0.260065	0.93563		0.263963	0.330014	-0.876529		-0.292916	-0.465775	0.0212795		-0.177434	0.306042	0.561498	0.476683						-0.300513		-0.443266	0.0340679	-0.370169		-0.9105
906	AA256304*293C9	distal-less homeobox 4	Hs.172648	0.307344	-1.01216	-0.800643	-1.26366	-1.64439	-0.476519	-0.392515	-0.526995	-0.0707856	-0.81505	-1.3495	-0.485367	-2.87219	-0.655929	-1.16782	-0.32778	-0.0868535	0.485824	-0.599629	-0.684353	-0.544539	-0.823854	-0.135557	-1.00391	-1.44059	-0.612758	-1.69616	-1.10598	-1.55975		-1.65427	-0.577393	-0.689582	-0.673558	-2.51113	-1.1897	-1.39348	-0.61361	-1.89456	-1.02121	-0.69408	-0.738061	-1.88045	-1.24704		-0.406904
907	AA237029*294C1	dynamin 1-like DNM1L	Hs.550499	-0.179904	0.074196	-0.318912	-1.06368	-0.472349	0.170894	-1.54413	0.495991	0.276644	-0.367178	-0.368863	-0.327185	-0.197995	-0.0133166	-0.160695		0.255277	0.205045	-0.469589	-0.747591	-0.370336	-0.839102	0.222717	-0.080996	0.101393	-0.556501	-0.353237	-0.031809	-0.55576	-0.000912893	-0.402441	0.419361	0.0292987	0.315924	-0.418619	-0.373228	-0.560603	0.48421	-1.15093	-0.682684	-0.35425	-0.318312	-0.125636	0.0674328	0.0836359	0.625885
908	AA283006*294C5	SMC4 (structural maintenance of chromosomes 4, yeast)-like 1	Hs.50758	-0.47844	-0.148381	-0.338966	-0.463899	-0.227014	0.206591	-0.692727	-0.123307	-0.448581		-0.422498	-0.238455	-0.224334	-0.250657	-0.215256	-0.096997		-0.961787	-0.930802	-1.19997	-0.63123	-0.420165	-0.247905	-0.144556	-0.0555089	-0.453047	-0.987498	0.39791	-0.65142	0.271911	-1.30501	0.0928199	-0.912299	-0.677234		-0.841268	-0.806622	-0.440903	-0.647176	-0.604794	-0.650625	-0.296321	-0.772619	-0.665983	-0.285069	0.284497
909	AA465402*294C9	AA465402		0.0674477	1.22503	-0.0828275	-0.790619	0.926993	0.452817	0.260411	-0.331034	-1.08432	-0.0175834	0.0901852	0.0454586	-0.219257	-0.131723	0.103056	-0.319711	0.0291186	-0.792551	-0.187561	-0.447999	-0.416091	1.05832	0.325054	-0.614629		0.926809	-0.503308	0.500206	-0.267984	0.410629	-0.222347	0.224156	-0.498614	-0.486615	-1.03201	-0.635814	0.22468	-0.350631	-0.31188	-0.407908	-0.976565	0.249989	0.643583	0.0234416	0.522781
910	AA933862*295C1	CD3E antigen, epsilon polypeptide (TiT3 complex)	Hs.3003	-1.56209	-1.74022	-1.00185	-0.84882	-0.824951	-2.0463	-1.66294	-3.05138		-2.90303		-1.2273			-2.7343		-0.17593	-2.42312	-1.73308				-1.24457				-1.97983						-1.0576	-1.96839				-2.52157	0.705758	0.0799873	1.50232				-1.86427	-1.53507
911	AA972853*295C5	Cas-Br-M (murine) ecotropic retroviral transforming sequence	Hs.99980	-0.253662	0.127201	-0.0720415	-0.388011	-0.115259	-1.00308	-0.468259	-0.369274	-0.942018	-0.114188	-1.10411		0.0981141		-0.829528	-0.0912338	-0.0441317	-0.284931	0.0620952				-0.511103		-0.975106	0.272403	-0.831427	-0.961676	-0.625222	-0.234874	0.72357		0.144359	-0.439733			-1.03416		-0.402931	-0.206986		-0.757544	-0.526334	0.0617941	-0.254229	-0.89609
912	AI001038*295C9	dystrophia myotonica-containing WD repeat motif	Hs.275924	-0.259109	0.120779	-0.835156	0.190859			0.537555	1.20889		-0.208361	-0.191796	-0.564974				-0.372209	0.0400201	0.999007					-0.209296		0.0600848		0.028578						-0.0603843	0.281145			-0.626858	-0.725758	-0.721541	-0.251432	-0.309002			0.623916
913	AI081658*296C1	WNT1 inducible signaling pathway protein 2	Hs.194679										-0.696683						-1.24873							-0.162341										-0.917889						-0.690623
914	AI024088*296C5	phosphoinositide-3-kinase, class 2, gamma polypeptide	Hs.22500		0.722601	0.770722	0.277882		-0.613342											0.16287						-0.802969
915	AI076019*296C9	perforin 1 (pore forming protein)	Hs.2200																																									3.63519
916	AI368184*297C1	related RAS viral (r-ras) oncogene homolog	Hs.9651	0.614957		0.563758	0.874593	0.854724	0.347592	-0.845353	0.555325		-0.622066	0.662869	1.57223	0.07478	0.0247598			-0.255673	0.414561	1.27277		-0.138677	2.26299	0.504364	0.776711	1.47606		-1.10951		0.610197	0.334123	0.0206495	0.850642	-0.873041	0.445683	-1.53538	1.38698	1.40518	0.788559	0.335195		0.463384			2.23983	-0.457436
917	AI290848*297C5	Fukuyama type congenital muscular dystrophy	Hs.55777		-0.0322103	0.298715	-0.115884	-0.299938	-1.31319	-0.861933	1.01094		-0.875528		0.204759						0.196071	-1.00688				-0.32368						-0.0483423					-0.109797										-0.736601
918	AI279026*297C9	hypothetical protein	Hs.155090			-0.254126	0.0405655	0.780847	-0.287173	-0.460449	1.4376		1.04579						-0.899452	0.130863	0.646691					-0.19289											-0.06369
919	AI339155*298C1	toll-like receptor 1	Hs.2474	0.565958	0.419733	1.35015	1.79956	1.77337	1.26896	0.093351	0.581554	-0.534591	0.24585	0.996614	0.738229	0.295408	-1.04316	0.879853		0.144669	0.0942805	-0.380352	-0.0971216	0.240634	0.088847	0.0687083	0.915878	-0.0385222	0.767845	0.253559	-0.2105	0.0841985	-0.0842706	0.0628412	0.35749	-0.906173	-0.436431	0.404898	0.839839	-0.0627753	0.588709	0.781378	0.965072	1.21725	0.841612	0.350063	-0.0404841	-0.00425388	0.311544
920	AI352345*298C5	carbonyl reductase 3	Hs.154510	0.568326	0.221902	0.579578	0.272248	0.278566	-0.33858	1.4887	-0.101549	-0.398157	0.536985		-0.0630463			0.111327		-0.211625	-0.206629	-0.469183	0.246366	-0.445977	-0.752347	-0.280709	-0.679412	-0.964594	-0.506401	-0.850805	0.86816	0.55913		0.206769	-0.684714	-0.16699	-0.41552		0.490068		-0.540456	-1.43189	-0.0346873	-0.940426	0.415304	1.86703	-0.747373	-0.717549	-0.723187
921	AI336142*298C9	protein phosphatase 1, regulatory (inhibitor) subunit 3 (glycogen and sarcoplasmic reticulum binding subunit, skeletal muscle)	Hs.127614		0.324072					0.762724											0.399852			0.09184																			-0.0841851
922	AI360264*299C1	peroxisomal biogenesis factor 7	Hs.79993	0.341196	0.072252	-0.196014	-0.368797	-0.3085	-0.889149	0.349944	0.0279989		-0.0758077					0.9052		0.810257	0.407193			0.0318523		-0.0999448	-0.284442	0.915285		0.726696			0.253515			0.138871	0.211954						-0.372941				0.0893056
923	AI362799*299C5	DNA segment on chromosome 21 (unique) 2056 expressed sequence	Hs.110757	0.182987	0.758319	0.0516108	-0.0218512	-0.0255427	-0.142473	0.692147	0.260292	-0.665795	-0.0736589	-0.155904	-0.0878709	0.531853		0.150143	-0.318255	-0.306644	-0.293699	-0.15892	-0.218462	0.0689412	0.442776	-0.288703	0.0861936	-0.00842011	0.467076	0.644311	0.255024	0.0474929	-0.171224	0.368377	-0.0989864	0.150172	-0.00582411	-0.181428	-0.100122	0.220203	-0.128289	0.1867	-0.186561	-1.05208	0.316989	0.703035	0.246859	0.273439	0.423211
924	AI362866*299C9	pituitary tumor-transforming 1	Hs.252587	-1.75419	0.992291	-0.378186	-1.05256	-0.725003	-1.28478	-1.33676	-0.277574	-5.45002	-1.81047	-1.56839	-1.85985	-3.608	-2.46618	-1.14534		-2.00599	-3.52498	-1.47135	-2.82263	-1.46887	-1.92157	-2.1207	-1.03208	-1.13875	-0.477739	-2.2081	-0.678849	-1.51539	-1.36924	-1.64713	-1.45706	-0.957184	-1.62981	-1.62993	-1.10676	-1.6191	-1.83672	-0.859291	-1.70438	-1.92311	-0.592613	-1.75021	-1.74874	-0.403932	-1.27845
925	AA878277 | AI732916*324C1	ESTs	Hs.125388						0.487984	-0.0911397														-0.0363647		-0.0222898						0.918008			-0.436103								-0.0260399
926	AA878224 | AI732881*324C5	ESTs	Hs.125386						1.38661		0.261573		0.110848	0.364577	0.0545582				-0.390342		0.676169			0.137545		0.163253						0.416603			-0.193456								0.283859
927	AA904085*324C9	hypothetical protein FLJ10063	Hs.154091		0.425334	0.521281	0.239354	-0.00425923	0.275546				0.677602							0.124009	1.90957					-0.135783										0.451801	0.883095
928	AA456007*325C1	RNA binding motif protein 5 RBM5	Hs.201675	-0.586696	0.00178367	-0.421982	-0.119179	0.114829	-0.768017	0.369288	0.301229	0.691789	0.218235	0.327289	-0.00101161	-0.103007		0.0958948	0.321547		1.1487	-0.173993		0.750432	-0.0701033	-0.093637		0.0872415	0.052124	-0.074435	0.0300707	0.13646	0.304902	-0.67407		-0.637952	-0.320229	-0.709515		-0.395499	0.101514	-0.548796	-0.135806	-0.108314	0.140867	0.123578	-0.199469		-0.111979
929	AA487257*325C5	high-mobility group (nonhistone chromosomal) protein 17-like 3	Hs.236774	-0.209635	1.11435	0.343373	-0.419808	-0.232232		0.133049	0.814701	0.498389	0.578062	0.578593	-0.123908						0.466606	0.0655975	-0.210106		0.0243819	0.214397		0.803386	-0.221607	0.594874		0.137805		0.0131734		0.397105	0.553906		-0.0976322	0.402138	0.732435	0.0469534	-0.184723	0.483841	0.450377	0.668548	1.21241		0.410961
930	R51209*325C9	protein phosphatase 2A, regulatory subunit B' (PR 53)	Hs.236963	0.489711	0.734521	-0.128275	-0.361626	-0.400647	-0.000621089	0.41155	-0.0899211	0.656459	0.51305	0.564261	0.649616	0.362559	-0.120195	0.0304758	0.588454	-0.218796	1.08963	0.14992	-0.122671	0.103008	1.40451	0.271304	0.549274	1.25937	-0.0434385	0.106922	0.114127	0.193874	0.490441	-0.465975	0.589921	0.154723	0.225589	-0.723393	0.0368131	0.187469	0.345792	-0.15191	0.0263437	0.678551	-0.107362	0.0108066	0.402732	-0.316973	0.317143
931	AA521474*326C1	helicase-moi	Hs.87889	-0.515459	-0.0769373	-0.355018	0.388311	-0.258251		0.0977562	0.2254	0.796708	0.257789	0.127886	0.570414	0.0934126	0.082771	0.286697	0.715513	0.451875	0.611783	0.184146	0.0754809	0.886215		0.0925149		0.345095		0.743822	1.02575	-0.0800853				-0.0868071	0.523709	-0.738677	-0.382606	0.899821	-0.0970442	-0.112659	-0.0145797	0.382214	0.493932	0.364707	0.0548136		0.901077
932	AA489523*326C5	eukaryotic translation elongation factor 1 delta (guanine nucleotide exchange protein)	Hs.223241	-0.0317632	0.745851	-0.0990999	0.68013	0.313604	-0.280113	0.580999	0.572449	-0.618246	0.681836	0.215423	-0.181531	0.693337	0.49874	1.37322		-0.433106	0.0908603	0.134698	0.39193	1.55658	0.285975	0.306021	0.0932619			1.54669	0.122823	-0.104265	0.99727		1.1474	-0.33418	0.432156		-0.104806	0.503897	0.473765	0.340261	-0.044938				0.759352		-0.306281
933	W72103*326C9	Homo sapiens mRNA; cDNA DKFZp564N1063 (from clone DKFZp564N1063)	Hs.236443	-0.403889		0.0964824	-1.00808	-0.108333	0.262285	-1.09224	-0.338126	-0.534217	0.374587	-0.26587	-0.480115	0.459972	0.268423	0.355194		-0.401303	0.539646	-0.241162	-0.67372		0.534664	-0.230787	0.2995	-0.252076	0.44758	-0.345235	-0.491311	-0.642271	0.548905	-0.318948		-0.198637	-0.0360657	-1.38079	-1.37687	-0.247343	-0.450874	-1.00758		0.253378	0.0927144	0.0730937	-0.746612	0.0564598	0.382832
934	AI123992*327C1	fatty acid desaturase 3	Hs.21765																					-0.452235
935	AI095488*327C5	hypothetical protein DKFZp564F013	Hs.128653	0.11541	-0.20945	-0.137915	-0.139874	-0.42287	-0.0862635	-1.77527	-1.00055	-0.465721	-0.181712	-0.49582	-0.862819	-0.741232	-0.622672			-0.0915884	-1.05471	-0.512722		0.828942	-0.527236	-0.0519772	-0.282367	-0.636532	0.242447	-0.319742	-0.0507117	-1.00862	-0.686031	0.935107		-0.407796	-0.135256	-0.579478	-0.763564	0.575703	-0.105422	-0.605107	0.372984	0.222727	-0.514924		-0.0557856	-0.0969342	0.156141
936	AI049675*327C9	GDNF family receptor alpha 1	Hs.105445	-1.84583	-1.95028	-2.70057	-2.94951	-3.7752		-5.02362		-4.50373	-3.19387			-0.542944		-3.86398		0.930486	-3.97941	-2.8578		-0.631866	-4.0168	-2.14679	-3.46102	-4.0081	-5.06015	-2.88713		-4.62049	-3.1679	-3.32771		-3.57406	-3.58144						-1.85388	-4.19312				-2.46301	-5.57994
937	AI272833*328C1	cathepsin G	Hs.100764				-0.999176	-0.949288		-0.930222	-0.35369		-0.871975								-0.760602	-1.20273		-0.501191												-0.780857	-1.21252						-0.964564
938	AI278206*328C5	Homo sapiens clone IMAGE 21721	Hs.146007		-0.188843		-1.24289			-0.177684	-0.341462		0.0196403	0.240402	-0.339729						0.181075			0.422495													0.0814494						-0.0547834
939	AI279830*328C9	KIAA0823 protein	Hs.45719							-0.618452			0.00262639		0.397081									0.233465																			0.624742
940	AI368611*329C1	KIAA0138 gene product	Hs.159384	0.271936	0.349011	-0.0206405	0.145029	0.0399045	0.212045	0.522239	0.160022	-0.034747	0.281261	1.14917	0.230639			0.675426	0.62338	0.217871	0.312933	-0.37925	0.409095	0.875354	0.471287	-0.0132421	0.254825	-0.0124391	0.181449	0.274475			0.628497		0.44712	-0.908812	0.0532106		0.282652	-0.0386509	0.14216	-0.0281385	-0.253253		0.284152	-0.296896	0.229664	0.0816964	0.638611
941	AI369785*329C5	neural proliferation, differentiation and control, 1	Hs.105547	1.2593	-0.0167656	-1.07796	-0.00957209	-0.384029	-0.776854	1.29227	0.574884	1.36626	0.150514	0.214198	-0.0569344	1.14531		0.795802	0.353944	-0.284213	1.6718	-0.0955134	2.05501	0.650098	0.0923367	0.713028	-0.0480326	-0.440156	1.18969	1.08937		0.778606	0.0756359	0.715661	-0.412638	0.311625	0.275162		-0.982175	0.0945186	-0.758645	-0.596027	-0.0299625	0.180751	-0.345541	0.140523	0.541912		-0.209854
942	AI364359*329C9	Zic family member 2 (odd-paired homolog, Drosophila) ZIC2	Hs.132863	0.114567	0.0216904	-0.642529	-0.653158	-1.0726	-1.01523	-0.387095	-0.414655		0.508305	0.609083	-0.296613	0.0617957		-0.926186	0.0338356	-0.136578	0.696905	0.501275	0.648033	0.750628	0.62753	0.24326	-0.295534	0.701173	0.188191	0.635065	0.892487	0.643648	-0.285529	0.400925	0.338173	0.64539	0.807173	-0.372285	-0.786349	0.298069	-0.69355	0.503157	0.0939323	-0.927507	-0.663061	-0.153261	0.4597	-0.938117	-0.19649
943	AI038082*330C1	Human DNA sequence from clone 34B21 on chromosome 6p12.1-21.1. Contains part of a gene for a novel protein with ZU5 domain similar to part of Tight Junction Protein ZO1 (TJP1) and UNC5 Homologs, the gene for a novel BZRP (peripheral benzodiazapine re	Hs.132724	-0.181993	0.702417	0.402611	0.147553	-0.68148		-0.185819			0.541719		0.496763			-0.0863499	-0.186644	-0.571908	0.465768					0.206386						0.257748	-0.580613				-0.0898556						-0.178015
944	AI081918*330C5	SCAN domain-containing 2	Hs.283825			0.570837	-0.0279478		0.92074										-0.365998		1.1187											0.36459					0.249207
945	AI078570*330C9	phosphoglucomutase 5	Hs.167473						-0.932113																																		-0.533649
946	AI418741*331C1	AI418741		-0.728994	0.0919181	-0.202596	0.317028	-0.0149849	0.171719	1.91666		1.97661	0.896441	0.690729	1.59726	1.75255			2.10844	0.0296854	0.761082	0.253498	2.41719	0.350267	1.40868	1.72071	0.330999	0.969931	0.543131	1.54061	2.85214	0.724002	1.86413	1.74396	2.24175	0.546185	0.638082			2.3966		0.0843176					1.58387		3.21819
947	AI380344*331C5	peroxisome proliferative activated receptor, alpha	Hs.998						0.210943		-0.795792										0.170721																-0.248404						0.153145
948	AI380629*331C9	v-src avian sarcoma (Schmidt-Ruppin A-2) viral oncogene homolog	Hs.198298				0.128766	-0.180464	0.223891	1.24797	-0.282405		1.80789	1.42932	0.898455					0.0981118	2.41704	2.10532	2.72625	2.07746		0.999559		1.65435		2.67784	2.25584	2.55158		2.2032		1.72344	2.21821			1.22455	0.0464344	2.323	1.02115			1.31324	1.99635
949	AI582245*332C1	desmoglein 3 (pemphigus vulgaris antigen)	Hs.1925	2.48317	0.223952	6.99536	7.85279	2.31488	7.38215	-0.47865			0.102021	-0.344281	2.68105	0.895716		0.663015		0.360149	0.15921	1.69633					2.59059	0.646733		-0.216915		-0.0391892		1.29076		1.99623	1.44738		7.28275	0.253201				1.5887	7.35107	0.98189	0.731063		1.13011
950	AI624998*332C5	Homo sapiens mRNA full length insert cDNA clone EUROIMAGE 375854	Hs.126901	-0.168229	0.482758		1.80994	-0.189841	1.93534	0.878673			-0.0506621	-0.409293	0.662379			-0.34311			0.225882	-0.467468				-0.360251		-0.143704		-0.00718624		0.259869		0.620486		-0.0405838	0.103164		4.10378										-0.468177
951	AI655379*332C9	transient receptor potential channel 3	Hs.150981	0.227571		0.393722	0.560519	0.731982	0.863269	0.614126	0.34169	1.24733	0.575113	0.640115	0.389831	0.755245	0.285269	0.388265	0.921489	-0.210174	0.968196	0.688547	1.15355		1.23798	0.882422	0.603048	1.72678	0.732736	0.752125	0.145634	0.491206	1.12389	0.562134	0.76373	0.137328	0.36999	0.501021	0.915676	0.17437	0.57099	0.542378	0.193157	-0.480256	3.54771	-0.0532708	1.07474	0.711963	0.251201
952	AI650675*333C1	neuromedin B	Hs.83321			0.67484	1.41366			0.184528	-0.606777		1.1058	0.919232	0.62398						0.219647	2.76997								1.46608				0.449784		-0.028765	1.27745		2.35547	1.8487	0.431802	0.787783							1.1172
953	AI652076*333C5	solute carrier family 35 (UDP-N-acetylglucosamine (UDP-GlcNAc) transporter), member 3	Hs.159322	-0.563554	-0.394782	0.136636	-0.0919769	-0.174563	0.389502		0.950343	1.13949	0.303985	0.484607	1.07307					0.516023	0.316391	0.0261394	0.247406		0.969674	0.251985	0.378212	0.602961	-0.270899	0.648475	2.26672	0.300928		0.425837		0.219761	0.593752			0.42509	-0.266845	0.3979		0.55823	0.76329		1.25684	0.434585	0.134894
954	AI652290*333C9	mitotic spindle coiled-coil related protein	Hs.16244	-0.234381	1.00949	-0.299881	-0.815969	-1.98274	-0.66768	-0.58398	0.856053	-1.14245	-0.972777	-0.856504	-1.49198		-0.951233	-1.33657		-1.17095	-2.51091	-0.895182			0.107381	-1.31222	-0.293211		-0.332992	-1.12505	0.477647	-0.347436		-0.204134		-1.14075	-0.598131	-1.38798	-0.68949	-0.304621		0.508846		-1.50291	0.456767		-0.535697	0.249422	0.117677
955	AI680557*334C1	collagen, type IV, alpha 6 COL4A6	Hs.408	1.04895	1.28881	1.6561	-0.353618	3.03692		-0.771741	1.95971	0.121925	2.35431	0.379462	2.3257		2.35545	0.424283	1.92683		2.18168	1.80219	0.712474	1.27668	0.806816	1.55966		1.63394		-0.455218	0.162079			2.2476		1.63344	1.39749	2.52884	1.52506	0.0609482	1.11982	-0.242323	2.11886	0.879411	0.0437722	0.359816	-0.334187	0.929892	1.88481
956	AI682350*334C5	small nuclear ribonucleoprotein polypeptide A	Hs.173255	-0.466556	0.170077	-0.443336	-0.608671	-0.482542	-0.857538	0.139551	0.287783	-1.16792	0.0404184	0.288016	-0.0750047	-0.8899		0.0065071		-1.16713	-0.502633	-0.271887	-0.128124	-0.12148	-1.12844	-0.277435	-0.741725	-0.016039	0.575323	-0.241199		-0.50477		0.34113		-0.783008	-0.30705		0.240844	-0.561502	-0.626477	-0.192844	-0.666429	-1.08255	-0.0824763	-0.884032	0.0731429		0.0559945
957	AI682462*334C9	reticulon 4 RTN4	Hs.429581	-0.256024	1.02435	0.0057827	-0.154522	0.440203	0.0365169	0.0127367	0.442802	-0.444536	0.103018	-1.00832	-0.262354	-0.323042	0.150169	-1.23758	0.117552	0.64255	-0.163994	-0.0694035	-0.591944	0.312334	-0.698944	0.782192	0.597242	-0.240978	-0.014747			-0.0448466	-0.332674	-0.0980856	0.164013	0.401346	-0.469364	1.08839	0.0180014	1.0974	0.25996	0.548555	0.808583	-0.642909	-0.308702	0.2132	-0.652048	-0.115838	1.10488
958	R91567*335C1	ESTs, Weakly similar to ALU4_HUMAN ALU SUBFAMILY SB2 SEQUENCE CONTAMINATION WARNING ENTRY [H.sapiens]	Hs.38540	-0.204777	0.425267	0.498823	-0.0198336	-0.275735	-0.270691	-0.0135627	-0.250812		-0.117071	-0.584638	0.0530485	0.275651		-0.0611172	-0.0711671	0.369687	0.372059	-0.127015	-0.256503	-0.0480201	-0.322335	0.0203529	0.0337794	-0.472231	-0.400233	-1.12851	-0.576718	-0.954269	-0.169047	-0.28981	-0.102793	-0.789468	-0.382651	0.647381	0.576815	-0.169452	-0.0345411	0.152964	-0.106713	0.062313	-0.273591	-0.116603	-0.860019	-0.0734123	0.108106
959	N52627*335C5	N52627		1.18342	0.156051	-0.259323	-0.128851	-0.570342	-0.782904	-0.0103319	-0.360026	0.540002	0.00868162	0.8364	0.689665	-0.214182		0.971664		-0.0703716	0.367791	0.535721	0.487792	-0.102188	-0.258391	0.847176	0.0814279	0.248158	0.464633	0.874179	-0.306482	0.34659	1.42042		0.80271	0.0624486	0.520194	0.181455	-0.529839	1.18657	-0.00864	-0.203877	0.395313	-0.67884	-0.104787	-0.785364	0.458828	-0.169789	1.51817
960	R26795*335C9	ESTs	Hs.302298	0.146313	0.323325	0.382007	0.115056	-0.444977		0.0567074			0.0124522	0.238753	-0.062544	-0.103202				-0.249997	0.093796	-0.516765		-1.10675					0.332016	-0.378585		-0.278796		-0.867169	-0.728158	-0.548416	-0.110659				-0.345838		-0.286187
961	W68291*JK200B1b	Integrin beta 2, (antigen CD18 (p95), lymphocyte function-associated antigen 1; macrophage antigen 1 (mac-1) beta subunit) (ITGB2)	Hs.375957	-0.19107	-0.610878		1.98814	1.18798	0.0118827	0.427514	0.390689		-0.262266		0.0721786						-0.253015			-0.868185					2.064	0.960976							-0.452517				0.351269	2.28931	0.493154	2.28028
962	AA434397*JK200B9b	integrin, beta 5 ITGB5	Hs.13155	0.531541	-0.310322	-0.576205	0.0930026	-0.539325	-0.271459	-1.83449	0.271652		-0.116992	-1.1491	-1.92982	-2.63282		-1.64393		-0.208449	-0.932735	-0.651946	-1.03014		-2.50326	-1.04272		-2.05324	-0.0792803	0.312868		0.22994	-0.473105	0.0978432		-0.639089	-1.01894	-1.84368	-0.160513	-1.91722	-0.863427	-2.16982	-0.828895	-2.66719	-1.15666	-1.69124	-2.0536	-1.31068
963	T64134*JK200B17b	small inducible cytokine subfamily A (Cys-Cys), member 13 CCL13	Hs.414629	1.8181	0.079649	1.03466	1.65566	3.54717		1.38773	1.28415		0.254972	0.200491	-0.310375			0.47254	-2.17305	0.177579	0.97378	1.27776	0.228283	1.32079	-0.214552			0.335695	1.78554	0.609849		-0.00543751	-0.445266	0.230812		0.36937	1.31849			1.26708	1.49021	0.831634	1.73315	0.687418		1.52884	-0.368955		0.389577
964	AA676797*JK200F1b	cyclin F	Hs.1973	-0.898863	1.01532	-0.304266	-0.501906	-0.632415	-0.765441	0.432435	0.163287	-0.316766	-0.0387445	0.0805603	-0.53558			-0.566981	-0.269553		-0.450736	0.211206	0.664195	-0.129216	0.255782	0.394289		-0.0679472	0.650193	0.790229	-0.220768	-0.293327		1.08423		0.004778	-0.0179335	-1.8764	-0.306098	-0.325117	-0.535077	-0.0524411	-0.0965682	-1.65958	-0.575805	-0.493342	0.45879	-0.238314	0.0784203
965	AA676957*JK200F9b	catenin (cadherin-associated protein), alpha 1 (102kD) CTNNA1	Hs.445981	-0.433648	0.082236	-0.264798	0.0974052	-0.20364	-0.238356	0.808775	0.49887	0.888424	0.638515	0.687563	0.305101	0.341058	0.682879	0.409111	0.551806	0.185489	0.57384	0.209853	1.03982	0.504719	-0.298638	0.804527	0.41995	0.611882	0.140048	0.581542	0.692686	0.625609	0.615023	0.565886	0.586159	0.289944	0.269604	0.60278	0.390634	0.263534	-0.178332	0.0781983	0.307016	-0.930954	-0.987885	-0.450366	0.213149	-0.0314841	-0.123471
966	W63749*JK200F17b	B-cell CLL/lymphoma 2 BCL2	Hs.150749	0.399051	0.368683	0.0967899	0.513963	-0.283376	0.734986	0.326084	0.572215	0.551768	0.511734	0.308282	0.54821	-0.676822	-0.00993685	1.12704	-0.00320655	0.145248	0.18277	0.469009	0.729172	0.225826	0.209334	0.178194	0.323083	0.512548	-0.023405	1.04661	-0.482928	-0.126197	0.641993	0.745568	-0.0794281	0.664718	0.256934		0.576696	-0.233761	0.759896	0.467475	0.648444	-0.00476651	0.12277	0.262182	1.76754		0.203799
967	AA443351*JK200J1b	v-erb-b2 erythroblastic leukemia viral oncogene homolog 2 ERBB2	Hs.446352	-0.545988	-0.773985	-0.853999	0.663694	0.0991897	-0.2638	3.75834	0.24991	1.78932	1.95335	1.67558	1.74766	1.33943	1.98511	2.21372	0.870564	1.57261	1.90536	1.85388	2.55139	1.00896	2.92344	0.91734	0.764175	1.73052	3.16448	2.34509	2.77352	2.57151	1.45831	2.09529	1.96629	0.928257	1.03554	1.38316	-0.567169	1.92921	0.236977	-0.153731	1.02888	0.145432	0.303621	3.8086	1.80943	1.00164	0.812176
968	H90415*JK200J9b	breast cancer 1, early onset BRCA1	Hs.194143	-0.920445	-0.147707	-0.0586568	-1.29553	-0.235465	-0.600446	1.90614	0.462212	0.869223	0.310955	0.248495	0.376826	-0.231757		-1.3728	-1.43626	-1.19155	-0.100804	0.0644462	0.115162		0.950591	-0.508335		-0.129172	0.080078	-0.191973	0.140643	-0.880069	0.0326247	0.180506	0.239463	0.0264526	0.123885			0.459802	0.371284	-0.213764		-1.58825	-0.689195	-0.72222	-0.831814	0.0933069	-0.0582722
969	empty								-0.268338																	0.113317			0.0049892
970	empty								-0.45193																	0.0254784
971	empty
972	empty
973	AA406372*1A1	zinc finger protein, X-linked	Hs.2074	0.114307	-0.388255		2.79009	-0.654437	0.512463	-0.448999	-0.0969086		-0.474113	0.990845	0.45456			-0.0836861	-0.0236189	-0.436604	-0.374119	-0.534804		-0.412515		-0.446655		0.288687	-0.529834	-0.0895196				-0.45612		0.198755	0.329794	-0.434075	1.91275	-1.13233	-0.885354	-0.96321		0.0755951	2.67259	-0.276394
974	N77807*1A5	myeloid/lymphoid or mixed-lineage leukemia (trithorax (Drosophila) homolog)	Hs.199160	-0.817501	0.0452771	-0.157473	-0.573698	-0.45389	-0.778091	0.420729	-0.0694329		-0.0618556	-0.0708428	0.0912775			-0.258832	0.276823	0.328741	0.446125	0.789633	0.808093	0.633617	-1.97788	0.183574		-0.0960314	-0.33916	0.00611589			0.139236	-0.0872353		0.291409		-0.4462		-0.377536	-0.771651	-0.00528228		-0.124482	-0.59439
975	W49672*1A9	wingless-type MMTV integration site family, member 5A	Hs.152213	-0.3294		0.368602	0.236398		0.839449	-0.425102	-0.49741		-0.18209	-0.119691	0.391462			-0.451727	0.485929	0.514291	-0.0919813					-0.112627			-0.135704	0.00170613							-0.376537				0.231248	-1.08781		0.0161924	-0.347586		0.358296		-0.45428
976	AA447684*2A1	small proline-rich protein 1B (cornifin)	Hs.1076	2.46794	0.304216	8.23872	8.09298	0.679089	5.36824	3.16978			1.98605	5.0535	4.19043			4.17132	-0.592271	0.441184	-0.692839	0.478649				0.285059		0.590352	1.78443	2.52792		3.99372	2.87974	4.22572		4.3695	3.15514		6.87223		2.74598	-1.07021			8.20406	2.07315
977	H29485*2A5	Sjogren syndrome antigen B (autoantigen La)	Hs.83715	-0.506647	-1.69601	-0.170003	-0.151607	0.536231		-1.51539	-0.891589	-0.717618	-1.29369	-0.89307	-1.07394			0.0292031	-0.648919	-0.458455	-0.70229	-0.601531	-1.34502	-0.32463	-1.02394	0.113456		-0.82477	-0.900632	-0.703814	-0.417551	-0.743548	-0.564428	-1.27058	-0.782037	-0.608425	-0.930952	-1.52993	-0.521734	-0.480403	-0.354548	-1.04449	0.950508	-0.243263	-0.589558	-0.851025	-0.78073		-0.869823
978	H39991*2A9	selectin E (endothelial adhesion molecule 1)	Hs.89546							1.42087	0.169141	3.08914	2.70244	3.01576	2.56533			3.10478	2.56633	1.56486	3.01634	2.84635	3.15791	2.41973	2.77292	2.92016		3.65124	3.35431	3.22951	3.1275	4.39349	3.15586	3.23966	1.93972		2.02494	3.26389	0.861087	3.42209	1.99486	1.39514	0.815534	2.0709	1.40825	3.65494	3.75084		2.23871
979	AA464176*3A1	phosphoinositide-3-kinase, catalytic, gamma polypeptide	Hs.32942	-0.867019	1.55693	-0.0997513	-0.310299	-0.518754		-0.234411	-0.663785		-1.32561	-0.70246	0.00169251	-0.422012		-0.854175	-0.293841	0.264045	-1.23213	-0.269817	-1.43775	-0.182883		-0.179819		-1.75982	-0.425661	-0.627743	-2.07892	-0.468617	-0.980934	-1.64782		-0.738908	-1.1821	-1.72067	-0.294375		-0.931072	0.595364		0.989351	-1.51972	-0.610657	-1.32928		-0.798609
980	R66310*3A5	peptidylglycine alpha-amidating monooxygenase	Hs.83920	0.972929	0.79237	2.27224	-1.06086	0.219588		-0.455283	0.1938	-0.701973	-2.62065	-1.39694	-0.657193	-0.986721		-0.914794	-0.778639	-0.340787	-0.819713	-0.530918	-0.604485	-1.60661	-3.07196	-0.254448		-1.19463	-0.522543	-1.2522	-3.41398	-1.58778	-0.906803	-1.2695		-0.875607	-1.6106	-0.370087	0.0764343	-0.677528	-0.749535	-1.67226		-0.884682	-1.42045	-1.58097	-1.19295		-0.9191
981	AA053393*3A9	putative receptor protein	Hs.15196							-0.264091										0.481716				1.10014		-0.0671356
982	H69834*4A1	ESTs, Highly similar to 1312232A kininogen L,high MW [H.sapiens]	Hs.289056	0.92778	0.681693	0.873292	0.0420691	0.700178		-0.884947	1.51405	0.470176	0.550422	0.344705	0.361807	0.225856		-0.0773813	0.777991	0.176657	0.041383	1.03784	0.358969	0.43039	-0.11684	0.781834	0.611158	0.554677	0.525398	0.420979	-0.0181227	0.375392	0.222521	0.142243	0.276736	0.963273	0.565248	-0.283335	0.403051	0.416126	0.400846	0.172441		0.0532026	-0.333889	0.57062	1.0942		-0.512317
983	T99236*4A5	jun B proto-oncogene	Hs.25292	2.38531	0.219224	1.75585	2.61885	2.52505		2.1821	2.90372	2.56145	1.95602	1.95892	1.49493	2.18152		1.93252	2.56083	1.99405	2.175	2.71859	2.89979	1.86588	2.54546	2.8008	2.018	2.80111	0.69479	2.79116	1.33578	2.04501	2.53636	2.1857	2.69544	2.98539	2.77031	1.34403	2.55483	2.74184	1.68422	1.39725	1.91527	2.24415	2.23402	2.43529	2.47891		2.49249
984	AA416883*4A9	interferon regulatory factor 2 IRF2	Hs.83795		1.18713	0.891081	1.43899	1.28635	1.7748	2.17036	0.977789	1.75541	1.46001	1.0448	2.14997	2.06338		1.81356	1.7791	1.83149	2.01784	1.55634	2.24159	1.3303	2.07258	2.38374		1.06692	1.07598	1.83168	0.975178	2.09318	0.991019	1.66964	0.902685	1.92911	1.5887	1.74743	1.38486	1.3416	1.13576	1.61822		1.63642	1.11966	1.74737	2.21995		1.53198
985	R19956*JK200A1a	vascular endothelial growth factor VEGF	Hs.73793	0.311562	-0.613987	0.200726	-0.0896912		-0.151108	-0.323051	-0.0660557	-0.318186	-0.159059	0.161456	-0.409242	-0.755007		-0.461567	0.0435129	0.287742	-0.448932		0.164681	-0.166824		-0.335489		-0.739279	-0.384865	-0.506306		-0.285975		0.186473		0.464641	-0.0877953	-0.440351	0.293775	-0.203572	-0.57944	0.279052	-0.393293	-0.347348	-0.604811	-0.424938	-0.521773
986	R22050*JK200A9a	topoisomerase (DNA) II Beta	Hs.475733	-0.312376	0.208288	-0.198987	-0.553562	0.186991		0.027339	0.181153	0.624849	0.184452	1.79804	1.03831	0.483378		-0.382187		0.931936	0.535179	0.441169	0.237447	0.546759	1.3305	0.798794		0.822389	0.618869	1.068	1.5168	0.696764	0.286326	0.196495		0.917809	0.775661		-0.516556	0.96444	0.688519	-0.13002		-0.15451	-0.786811	0.519389	0.980031		0.706164
987	H73714*JK200A17a	replication factor C (activator 1) 1 (145kD)	Hs.507475	-0.488042	0.212514	0.406613	0.244846	0.153547	-0.0812064	0.215192	0.30457	-0.127538	0.0245431	0.351501	0.23033	0.416452		0.0585217	-0.107159	1.59808	-0.212894	0.255517	0.272281	0.26661	0.130061	0.0593097	0.271376	0.165754	0.071062	0.17892	-0.246955	0.0478869	-0.0713813	-0.0247341		0.247026	-0.0510312	0.212303	0.561211	0.362166	0.266281	0.199964	-0.249223	-0.0388903	0.431379	0.227685	0.612158		0.135163
988	AA045192*JK200E1a	retinoblastoma 1 (including osteosarcoma) RB1	Hs.408528	-1.42803	-0.672191	0.566474	0.417252	-0.398785	0.840074	-1.22621	-0.483069	-0.0465233	-0.0375599	0.847548	-0.655619	0.254371		-0.503666	0.0597396	-0.206388	0.000263589	0.139863	-0.28634	0.310042	-0.0851188	0.286701		-0.463367	0.261714	0.101123	-1.02425	0.238505		0.392734		1.05228	0.252951	-0.0932317	0.472353	-0.0526995	0.0678376	-0.798372	0.0142099	0.180324	0.0783162	-0.802748	0.0333897		-0.408469
989	AA443300*JK200E9a	matrix metalloproteinase 15 MMP15	Hs.80343	-0.44469	-0.453333	-0.312483	-0.0233254	-0.679395	-0.709314	0.0600972	-0.0871668	-0.0233367	0.173667	1.6057	0.0368012	-0.231763		-0.0111901	0.240051	-0.323339	0.0767434	0.388559	0.777379	0.305847	0.241682	-0.300229		0.161772	0.0195545	0.785813	-0.391315			2.22865		0.215639	1.84247	0.180243	-0.850595	0.0746714	-1.52558	-0.474365		-1.0764	-0.361383	0.201627	0.397956		-0.189502
990	AA436187*JK200E17a	integrin, alpha M (complement component receptor 3, alpha; also known as CD11b (p170), macrophage antigen alpha polypeptide)	Hs.172631	0.246306	0.225264	0.812577	0.983586	1.37626	0.854894	0.0544625	0.675983	0.153353	0.300394	1.20161	0.265961	-0.197858		0.199582		1.90515	0.584641	0.989172	1.4647	2.38454		0.0943006			0.555007	1.60375	0.168402			-0.224727		0.472459	0.306886	0.245697	0.215334	1.03048	0.570259	1.16697			0.706894	-0.0851866	0.305023		1.33575
991	R14663*JK200I1a	R14663	Hs.799	-0.49248	-1.56219	-0.553236	-0.596747	-0.48536	-0.702224	0.804128	-0.861581	-0.134979	0.141271	0.744337	0.143736	0.160302	-0.0814899	-0.751302	0.0537773	0.161898	0.817402	-0.0107183	-0.432615	0.185427	0.128525	0.218462	-0.82227	0.164204	-0.126683	0.624308	0.381805	0.787118	-0.731448	0.0135206	-0.430718	0.68835	0.685706	0.520188	-1.1039	-0.901336	-0.876976	-0.802566		-0.572003	-0.576201	-0.273444	-0.0969455		-0.609283
992	H73714*JK200I9a	replication factor C (activator 1) 1 (145kD)	Hs.507475	-7.26547	-6.22562	-5.16981	-5.60844	-6.94707	-7.3055	-7.26973	-7.54406	-7.04085	-7.29105	-6.9989	-6.71342			-5.04394	-5.94697	-3.19411	-6.47353	-5.74029	-5.86207	-7.29988		-5.9359	-6.16324	-5.46383	-6.97039	-5.953	-0.517755	-6.46707	-6.96677	-7.85654	-6.25732	-5.27528	-6.6505	-5.04069	-6.52584	-7.31912	-6.4972	-7.81437	-5.65871	-5.11239	-5.89303	-5.54875	-6.55155		-6.72049
993	H84153*JK200I17a	Cyclin D2 CCND2	Hs.376071	-1.1407	-2.63273	0.775782	-1.13214	-0.406522	-2.02381	-2.08149	-2.61376	-2.1952	-2.16628	-1.83913	-1.91709			-2.12255	-0.214116	-1.45354	-1.93159	-1.58685	-1.51599	-2.16794	-4.83067	-1.75925		-1.04894	-2.25868	-2.24386	-2.07767	-2.17311	-2.49132	-2.12959	-2.14408	-1.6977	-1.66001	-3.45966	-1.71806	1.46451	1.22329	-1.0123	-0.461217	-0.928038	-1.84929	-2.07787	-2.49304		-1.63114
994	R89981*JK200M1a	R89981								-0.211751				-0.594529	-0.227419			0.0806898		-0.0916296		-2.774				-0.633591			0.0473604		-0.477193	0.0823384
995	empty
996	empty
997	W73892*5A1	RNA binding motif protein 5	Hs.201675	-0.465054	0.0889697	-0.315352	-0.14978	0.231099		0.322575	0.143223	0.572452	0.242333	1.22438	0.284168	0.171123	-0.132051	0.244091	0.881569	0.544504	0.866775	-0.204162	-0.263881	0.639455	0.468509	0.273502	0.466915	0.223105	0.0694292	-0.0437169	0.431532	-0.0344174	0.396978	0.214086	-0.226007	-0.706475	-0.288981	0.490386	0.358007	0.326674	0.167391	-0.0687254	-0.352447	-0.239258	0.122256	-0.284031	0.253672		0.746115
998	R73608*5A5	solute carrier family 16 (monocarboxylic acid transporters), member 4	Hs.23590	-0.496337	0.521024	0.449155	-0.220081	-0.0533995		-0.614922	0.653331		-0.384372	-0.216571	0.2357	-0.0920282	0.853704	-0.0394866	0.147653	0.335279	0.195512	-0.0785493	-0.0145105		0.0663215	0.587934	-0.265931	0.143034	-0.0912822	-0.341044	0.198308	-0.507158	-0.910632	-0.56777		0.553936	-0.142979	0.828279		0.842474	-0.140529	-0.0399794		0.384478	0.11708	0.61128	0.180053		-0.0178037
999	AA054287*5A9	RNA binding motif protein 3	Hs.301404	-0.625583	-0.268197	-0.226311	-0.939717	-0.783033	-0.457803	-1.77564	-0.849418	-0.167049	0.773721	-0.545546	-0.441755	0.584276	-0.161777	-0.609506	-0.262738	-0.788043	0.239578	-0.28526	-0.344224	0.611147	-0.676918	-0.151886	-0.668873	0.218076	-0.907373	0.635331	-0.871869	-0.551998	0.492741	-0.611778	-0.436105	-0.64707	-0.512309	0.23275	-0.834484	0.116778	-0.669441	-0.0235293	-0.915461	-0.0881601	-0.436253	-0.454726	-0.775891		-1.28886
1000	N47966*6A1	phosphatidylinositol glycan, class B	Hs.247118	-1.30093	-1.00182	-0.034226	-0.793057	-0.0602189	1.06707	0.0672253	-0.00719173	-0.0339113	0.62658	0.0881614	0.753007	-0.0347703		-0.327182	0.696214	0.0904412	0.385846	-0.265999	0.0773777	1.11465		0.809248		0.403936	-0.902228	-0.0137345	-0.327884	-0.310776	-0.880911	-0.22035		0.311116	0.143569	0.413746	-0.337422	0.292294	-0.22516	-0.12797			-0.972041	-0.308983	0.207779		0.231164
1001	AA195636*6A5	msh homeo box homolog 2 (Drosophila) MSX2	Hs.89404	-0.966803	-1.87187	-0.110441	-0.378781	-0.303398		1.17591	-0.74663	1.90583	2.04282	1.73873	0.786932	1.14853	2.33119	1.10078	1.85934	1.09804	1.72164	1.32583	1.81764	2.04864	1.51137	2.29371		1.65071	1.44625	2.3353	1.23881	2.29847	1.12435	0.839861	1.00833	0.703128	1.69228	0.830685	-0.444038	1.00493	0.958797	1.67787		-0.697918	-0.565359	1.06996	1.69732		-0.118431
1002	N58136*6A9	D15F37 (pseudogene)	Hs.286132	0.0697263	0.534202	0.272049	0.0446562	-0.0941406		0.558902	0.695063		0.428651		0.892803	0.113751	-0.198856	-0.00565491	0.743668	0.461318	0.971046	0.403409	0.468278	0.433875	-0.0759648	0.599727		0.30518	-0.220873	0.434999	0.207936	0.159985	0.295482	0.243038		0.50218	0.793749	0.414705	0.243805	-0.124263	0.132502	-0.00186584		-0.313689	0.517148	0.183652	0.505642		0.709012
1003	H65343*7A1	KIAA0125 gene product	Hs.38365	0.828889	1.83216		0.360842	0.263059		0.650314	0.50343		0.89222		1.25183	0.322781		0.307393	0.167748	0.271217	0.319809	0.103818	1.41353	0.617184	-0.289547	0.768482		0.55954	0.144691	0.628458	-0.0246138	0.340876	0.215347			0.447018	0.245686	0.606744	0.491686	0.805405	0.956729	0.907591		0.746105	0.821654	0.452317			0.591979
1004	H73080*7A5	KIAA0094 protein	Hs.82007	-0.212239	0.220791	-0.36665	0.150949	-0.0918879	0.288297	0.196119	-0.280061	0.641149	0.403505	0.554549	0.536726	0.179659	0.758047	0.88363	1.05006	0.310257	0.517424	0.26202	0.74141	0.335416	0.74215	1.11192		0.726953	0.0410181	0.429059	0.130374	0.335759	0.410732	0.445971		0.64259	0.663103	0.839463	0.300476	0.164347	0.0846103	0.325254	0.160318	-0.0921953	0.632301	-0.181031	0.553059		0.316066
1005	AA112486*7A9	proteasome (prosome, macropain) 26S subunit, non-ATPase, 5	Hs.193725	-0.0892744	-0.042051	0.165516	0.0115484	0.126746	0.0690053	-0.431963	0.813205	-0.024042	-0.414437	0.223725	-0.517097	-0.361112	-0.831564	0.144224	-0.155666	-0.0161132	-0.532426	-0.122777	-0.482356	-0.690083	-0.361772	-0.116993		-0.307478	0.0515655	-0.437043	-0.0225312	0.0387028	-0.746775	-0.376711		0.000122644	-0.326217	-0.39141	0.12043	-0.5572	0.32995	-0.0779027	-0.347217	-0.249334	-0.00763058	-0.264262	-0.0206611		-0.311234
1006	R99911*8A1	Homo sapiens mRNA; cDNA DKFZp586F1822 (from clone DKFZp586F1822)	Hs.82719	-0.0584285	0.579355	-0.100307	-0.551319	-0.626641	0.0592482	0.0782748	0.3309	0.0671988	0.138077	0.942185	0.385504	0.0369914	-0.369228	-0.699901	0.203375	0.0740982	0.318875	-0.0481488	0.0914835	0.091373	0.0633043	0.411782		0.379356	-0.139651	0.296467	0.451252	0.476334	-0.242998	-0.208408		-0.122283	0.138875	-0.120125	-0.498346	0.303259	0.0831832	-0.341101		-0.139486	-0.323689	0.155835	0.390198		-0.210539
1007	R01428*8A5	WIRE protein WIRE	Hs.421622	0.0439191	0.139141	0.32956	0.168115	0.154041	-0.113951	0.904975	0.846156	0.365865	0.392487	1.34508	0.534335	0.284385		0.525221	0.506806	0.193386	0.737606	0.494337	1.09476	0.669428	0.798584	0.551265		0.568397	0.565858	0.830888	0.323569		0.298826	0.880602		0.3211	0.711335	0.688162	0.257181	0.348034	0.148554	0.579927		-0.305676	0.322104	0.472439	0.758306		0.488928
1008	T56021*8A9	carboxypeptidase D	Hs.5057	2.01166	1.85104	1.80482	1.38727	1.91054	2.26546	1.47979	1.1107	0.510013	1.77019	2.44091	1.00185	2.6969	2.89038	2.21333	1.75312	0.330936	1.35565	1.20233	1.16012	1.62959	2.44153	1.07019		3.06289	2.09886	2.35665	2.15294	2.11328		1.96714		0.40525	0.801428	1.34404	0.923771	1.54455	2.09535	2.44684		2.84413	2.58885	2.5446	2.62367		2.04607
1009	R97106*45A1	ESTs	Hs.167546	0.557491	0.569243		0.290931	0.318792		0.419516	0.844667		0.352784	0.919927	1.00104	-0.362271	0.215691	-0.234981	0.572972	0.236103	1.07963		2.07074	1.08134	1.41863	0.129915		0.395048	0.141963	-0.0449113	0.232695	-0.601898	0.573208	1.13912		0.604506	0.894776	0.697568	0.436815	0.865804	1.29955	1.14389		0.480266	-0.39988	-0.3216	-0.229925		1.10812
1010	R93080*45A5	ESTs	Hs.35035	0.578193	0.385267	1.17005	0.243657	-0.110982	-0.262571	-0.277301	-0.0424783		0.0880967	0.277819	0.271251	0.0856272	-0.294949	-0.0343293	0.676543	-0.030992	0.999443	0.499932	0.284353	0.264278	0.761719	0.319644		-0.0662536	-0.189571	-0.94775	0.0207731	-0.699925		0.181442		0.198505	0.583257		-0.0216699	-0.0630615	0.185606	-0.210401		0.116229	-0.259508	-0.856286	-0.387023		0.542652
1011	N49893*45A9	ESTs	Hs.35058	0.340494	0.367044	1.41781	0.482499	1.51497		0.833164	1.77546		0.124255	1.71121	1.32488		1.52679		0.107692	-0.0244965	1.50296	1.17198	1.67799		0.170775			0.347186	0.171719	0.00335177		-0.0843731	1.63209	0.0435311		0.604387	0.0323119	0.445226	0.651472	1.30899	1.81761	1.42773		-0.15111	0.130425	0.0153904	0.659546	1.27411	0.730286
1012	H48255*46A1	ESTs	Hs.36212	-0.0742788			0.221613	0.306376	-1.30351		0.333789		0.819708	-0.123353	0.69324		0.545683	0.26421	0.145624	-0.486747	0.793904		0.735748		0.643312	0.112817	0.194916	0.378856	-0.15416	0.609431			0.706448	0.325072		0.362148	0.398927	0.33994	0.274131	0.726184	0.586392	0.851441		0.238588	-0.691807	-0.0467687	-0.112666	0.66807	-0.348783
1013	H48537*46A5	ESTs	Hs.36258	0.939633	0.834159	1.56119	1.6053	0.710697			0.372426		-0.0281011	0.747529	0.677714			0.0638394	0.359282	-0.297841	0.764238	0.697809	0.463286	1.16278	0.101909	0.468568	0.253931	0.422499	0.374045	0.196068	0.0436255	-0.11256		-0.243696		1.03744	0.699705	-0.210357	0.192652	0.268565	0.657747	0.499725		0.224186	0.037012	0.0453349	0.0792244	0.215146	0.671651
1014	H54623*46A9	ESTs	Hs.36300	0.554793	0.698706	1.10627	0.381269	0.614207		-0.030771	0.899511		0.2733	0.435842	0.441295	1.09021	0.624951	-0.0140053	0.0302227	0.331391	0.318163	0.184229	0.771456	1.60653	0.569493	0.492432	0.080744	0.330742	-0.195246	-0.286968	0.286259	-0.424665	0.0463872	0.106945		0.494723	0.152765	0.33994	0.370285	0.854961	1.15249	0.465377		0.313617	-0.224752	-0.199929	-0.225464	0.359474	0.840037
1015	R19956*RJ200 AA1	vascular endothelial growth factor VEGF	Hs.73793	0.206114	-0.35621	-0.0712757	-0.0966499	-0.232973		-0.216482	-0.238069	0.0206221	-0.0244988	-0.277873	-0.298753	-0.690163	-0.371493		-0.188014	-0.59739	-0.596049	-0.187108	-0.276076	-0.118145	-0.270735	0.128206	-0.0851915	-0.137226	-0.352487	-0.496012	-0.717698	-0.457559	0.184144	-0.316915	0.215205	0.0312763	0.489774	-0.143823	-0.226625	0.0732968	0.0297725	-0.158313	-0.159288	-0.0508429	-0.716247	-0.100586	-0.273661	-0.0282667	-0.0118292
1016	R22050*RJ200 AA5	topoisomerase (DNA) II Beta	Hs.475733	-0.102893	0.169722		-0.365729	-0.473385		0.10618	-0.435083		0.283264	1.00792	0.449685	0.104784	0.698106	0.0275993	0.600337	0.169101	0.110015	-0.00817853	0.302049		1.04426	0.667674	-0.416011	0.735714	0.440251	0.130053	1.27252	0.00647915	0.404897	-0.213287		0.399709	0.409211	-0.0876732	-0.833294	1.05727	0.874228	-0.379348		-0.289249	-0.332432	0.283359	0.477339	-0.432381	0.631783
1017	H73714*RJ200 AA9	replication factor C (activator 1) 1 (145kD)	Hs.507475	0.0864216	0.258313	0.435628	0.160834	-0.00979641		0.30849	0.114229	0.0826748	0.186869	0.162888	0.269133	0.427448	-0.126732	0.133697	0.0637504	0.0302886	-0.188001	0.164547	0.247348	0.0526037	0.377182	0.21781	0.0770099	0.194071	0.00748176	-0.14047	-0.378488	-0.116164	0.314436	-0.0126573	0.136605	0.265539	0.308781	0.212045	0.510694	0.624406	0.335152	0.159725	0.111972	0.0749873	0.292078	0.49479	0.573985	0.226816	0.375986
1018	AA045192*RJ200 AA1	retinoblastoma 1 (including osteosarcoma) RB1	Hs.408528	-1.53445	-0.528218	0.619597	0.469321	-0.328217		-1.46494	-0.947352	-0.00250368	0.206355	0.505687	-0.445784	0.384188	-0.223568	-0.407837	0.202888	0.345651	0.182463	0.316755	-0.0256302	0.405571	0.305237	0.432994	-0.442342	-0.616438	0.509419	-0.21783	-1.29698	0.222379	0.156603	0.0924055	-0.223483	1.33991	0.287711	0.140314	0.730076	0.407981	0.457519	-0.638769	0.489498	0.660944	0.279948	-1.30293	-0.225089	0.257471	-0.637349
1019	AA443300*RJ200 AA5	matrix metalloproteinase 15 MMP15	Hs.80343	0.0878856	0.262423	0.811254		-0.118025	0.816985	0.244981	0.104807		0.179248	0.62311	0.250772	0.191726	0.378758	0.211366	0.115974	0.221869	0.305011	0.619739	0.607144	0.439604	-0.00169201	-0.106714	0.137921	0.271351	0.482395	0.640845	0.117173	0.438593	0.37952	0.82144		0.56056		0.5489	-0.0191448	0.753466	0.445967	0.0554869		-0.282164	0.285676	0.096901	0.220304	0.214079	0.446555
1020	AA436187*RJ200 AA9	integrin, alpha M (complement component receptor 3, alpha; also known as CD11b (p170), macrophage antigen alpha polypeptide)	Hs.172631		-0.353349		0.770919	0.550895		-0.0510739	0.312778		0.195188	0.496833	0.379698	0.479727	0.737172	0.487769	0.529299	2.35921	0.740276	0.839332	1.52397	1.51968	0.390527	0.475786	0.0990265	0.597786	0.728847	1.68059	0.580898	0.999434	-0.256632	0.543965		1.35816	0.414135	0.271317	0.212478	0.943512	0.547893	1.10684	0.844519	0.344237	0.891271	0.508846	-0.0843198	0.0242637	1.45653
1021	N62562*9A1	hypothetical protein 24636	Hs.4187	-0.829542	0.330277	-0.8824	-0.989406	-1.44173	-1.11136	1.86916	-1.73793	0.760126	0.67368	0.888385	-0.186855	-0.203175	0.150918	2.05243	-1.10647	-0.249951	-0.780594	0.294893	0.409946	0.265923	1.84379		-1.41361	0.384291	1.02746	0.422616	1.5456	1.90543	-0.721856	1.17569	0.72216	-0.569374	1.5186	1.0594	-1.93409	-0.561541	-0.962787	-0.304481	0.805838	-2.04426	-0.292259	1.02846	-0.698451	-0.861083	0.479881
1022	N54596*9A5	insulin-like growth factor 2 (somatomedin A)	Hs.251664	-2.17332	-5.31091	-4.27745	-3.13201	-4.36967	-3.90713	-4.72426	-5.58887	-1.41743	-0.784527	-1.66919	1.29277	-3.55666	-4.51815	-4.06372	2.00888	2.37721	0.960343	1.44542	2.47518	2.51574	-3.78467	-2.57888	-4.15036	1.53418	-4.18123		1.73867	0.815292	-2.52764	-2.1815	1.0666	2.02888	0.610065	-3.44485	-4.40563	2.7025	0.871653	-4.50697	-3.57625	-3.9945	-4.10258	-4.89301	-1.90461	-4.19404	2.72568
1023	W72322*9A9	ELAV (embryonic lethal, abnormal vision, Drosophila)-like 1 (Hu antigen R)	Hs.12379	0.443256	0.643255	-0.227657	-0.345604	-0.340701	-0.724405	0.340322	0.332965	0.264368	0.484232	0.699819	0.347586	0.0383857	0.24521	0.413139	0.600182	0.67434	0.165977	0.642906	1.02282	0.394233	0.921667	-0.124213	-0.158641	0.401229	0.145308	0.875777	0.48023	0.596916	0.487588	1.1757		0.752083	0.135637	0.622006	0.420051	0.74555	0.399902	0.37811	-0.133283	-0.424168	0.139473	-0.171103	0.572616		0.834106
1024	R01118*10A1	squalene epoxidase	Hs.71465	0.192627	0.596635	-0.539882	1.08688	-0.503311	0.405818	-0.278762	-0.509831	-0.382009	-0.3642	0.252699	-1.69685	-3.22146	-1.7723	-0.948515	-1.47373	-0.144039	-2.16783	0.674638	-0.12977	-0.0385123	0.748912	-1.09175		-0.831179	1.19018	0.114065	-0.68217		0.126147	0.812761		-0.693636	0.159962	0.26074	-0.287245	-0.689865	0.537376	-1.06573	-0.547207	-2.07854	0.548511	-1.36444	-1.26454	-0.978586	0.285575
[truncated: 9,344 more rows]
[truncated: 47 more columns]
